# Supplementary material for: Target deconvolution of HDAC pharmacopoeia highlights MBLAC2 as common off-target
Source: Research Square preprint supplement (doi:10.21203/rs.3.rs-646613/v1), 2021-07-12
Supplement: Supplementary file 3 [file 7087538f06eeb49d530b642e.docx]

**Methods**

**Preparation of iC.** 4-Azidobutanamine (1 µmol) was reacted with DMSO-washed NHS-activated (~20 µmol/mL beads) sepharose beads (1 mL) and triethylamine (20 µL) in DMSO (2 mL) on an end-over-end shaker overnight at RT in the dark. Aminoethanol (50 µL) was then added to inactivate the remaining NHS-activated carboxylic acid groups. After 1 h the beads were washed with 40 mL DMSO.

Alkyne-NHOTHP (1 µmol) (Supplementary Note) was then clicked to the azide-functionalised beads via incubation in 1:1:2 (v/v/v) DMSO:tBuOH:H2O (2 ml total volume including beads), 0.1 mM TBTA, 2 mM CuSO4 and 2 mM sodium ascorbate for 16h at RT in the dark on the end-over-end shaker. The beads were then washed with 20 mL of 1:1:2 (v/v/v) DMSO:tBuOH:H2O, 30 mL of 50 mM EDTA in water and 30 mL ethanol, then reacted with 10 mM HCl inEtOH (10 mL) for 16h at RT in the dark. Beads were washed with 50 mL ethanol to yield **iC**, stored at 4 °C in EtOH.

**Preparation of iQ.** Quisinostat (1 µmol) was reacted with DMSO-washed NHS-activated (~20 µmol/mL beads) sepharose beads (1 mL) and triethylamine (20 µL) in DMSO (2 mL) on an end-over-end shaker overnight at RT in the dark. Aminoethanol (50 µL) was then added to inactivate the remaining NHS-activated carboxylic acid groups. After 16 hours the beads were washed with 10 mL DMSO and 30 mL EtOH to yield **iQ**, stored at 4 °C in EtOH.

**Preparation of iA.** 6-Aminocaproic acid (1 µmol, 100 µL of 10 mM stock solution in 50 mM HCl tBuOH) was reacted with DMSO-washed NHS-activated (~20 µmol/mL beads) sepharose beads (1 mL) and triethylamine (15 µL) in DMSO (2 mL) on an end-over-end shaker for 16 h at RT in the dark. (TLC with Kaiser test staining was used to monitor successful conversion). Aminoethanol (50 µL) was then added to inactivate the remaining NHS-activated carboxylic acid groups. After 2 h on an end-over-end shaker at RT, the beads were washed with DMSO (4 x 10 mL) and resuspended in anhydrous DMF (2 mL total volume). HATU (10 µmol, 100 μL of 100 mM stock in DMF), O-(tetrahydro-2Hpyran-2yl)-hydroxylamine (12 µmol, 120 μL of 100 mM stock in DMF), Hünig’s base (20 µmol, 100 μL of 200 mM stock in DMF) and triethylamine (20 μL) were then added and the beads were incubated at RT for 16 h on an end-over-end shaker. Next, the beads were washed with 10 mL DMF and 30 mL ethanol, then reacted with 10 mM HCl in EtOH (10 mL) for 16 h at RT in the dark to deprotect the hydroxamate. Beads were washed with EtOH (3 x 10 mL) to yield **iA**, stored at 4 °C in EtOH.

**Preparation of other affinity matrices.** Probes **2** and **3** are respectively *para* and *meta* linkable analogues of reported class IIa inhibitor MC15681. Probe **4** is an analogue of a HDAC8 inhibitor2, 3. Probe **6** is a linkable analogue of Vorinostat4**. 8**-**15** feature alternative chelating groups to hydroxamate, grafted on hybrid structures of Vorinostat, Santacruzamate and LMK235: methoxymethyl ketone (8, 10, 11) found in a bicyclic tetrapeptide5, ethyl carbamate (12, 13, 14) found in Santacruzamate6 and 4-hydroxymethylimidazole (15) computationally suggested as superior to hydroxamic acid7.Amino-linkable compounds (2-6, 8-15) were immobilized on DMSO-washed NHS-activated sepharose beads with a coupling density of 1 µmol per mL beads via incubation with 20 µL triethylamine per mL beads on an end-over-end shaker for 20 h at RT in the dark. Remaining free NHS-groups were inactivated by blocking with 50 µL of aminoethanol per mL beads.

**Preparation of cell lysates for affinity pulldown assays.** Cell lines COLO-205, MV4-11, K-562, BT-549 and PC3 were grown in RPMI 1640 medium (PAN Biotech), SW620, OVCAR-8 and MCF7 were grown in IMDM medium (PAN Biotech), PATU-8998-S as well as SK-N-BE(2) were cultured in DMEM/HAM’s F-12 medium (PAN Biotech) and HEK293 in DMEM (PAN Biotech). All media were supplemented in with 10% FBS (PAN Biotech) and cell lines were internally tested for Mycoplasma contamination. Cells were lysed in lysis buffer (0.8% Igepal, 50 mM Tris-HCl pH 7.5, 5% glycerol, 1.5 mM MgCl2, 150 mM NaCl, 1 mM Na3VO4, 25 mM NaF, 1 mM DTT and supplemented with protease inhibitors (SigmaFast, Sigma) and phosphatase inhibitors (prepared in-house according to Phosphatase inhibitor cocktail 1, 2 and 3 from Sigma-Aldrich)). The protein amount of cell lysates was determined by Bradford assay and adjusted to a concentration of 5 mg/mL.

**(Competition) Pulldown assays.** For the selectivity profiling of HDAC inhibitors, lysates from SW-620 and MV4-11 cell lines were combined in a 1:1 ratio of protein amount to give a lysate mix with 5 mg/mL protein concentration. The 0.5 mL lysate mix (adjuster to 5 mg/mL protein concentration and 0.4% Igepal) was pre-incubated with 9 doses of HDAC inhibitor (DMSO vehicle, 3 nM, 10 nM, 30 nM, 100 nM, 300 nM, 1000 nM, 3000 nM, 30000 nM or for Valproic acid and Phenylbutanoic acid DMSO, 1 µM, 3 µM, 10 µM, 30 µM, 100 µM, 300 µM, 1000 µM, 3000 µM ) for 1 h at 30 °C in an end-over-end shaker, followed by incubation with 18 µL affinity matrix (1:1:1 mixture of iC, iQ and iA) for 30 min at 30 °C in an end-over-end shaker.

To assess the degree of protein depletion from lysates by the affinity matrix, a second pulldown (PDPD) with fresh beads was performed using the unbound protein fraction from the vehicle control flow through.

The beads were washed (1x 1 mL of lysis buffer without inhibitors and only 0.4% Igepal, 2x 2mL of lysis buffer without inhibitors and only 0.2% Igepal) and captured proteins were denatured with 8 M urea buffer, alkylated with 55 mM chloroacetamide and digested with Trypsin according to standard procedures. Resulting peptides were desalted on a C18 filter plate (Sep-Pak® tC18 µElution Plate, Waters), vacuum dried and stored at -20 °C until LC-MSMS measurement.

Other pulldown-based assays were performed according to the same protocol with minor changes: For triplicate pulldowns assessing cell line typical HDAC expression or affinity matrix enrichment properties, the pre-incubation step with HDAC inhibitor as well as the PDPD were omitted and pulldown was performed at 4 °C for 45 min. For Pulldown assays for probe comparison (Fig S1d), 1 mg protein from a 1:1 mix of MV4‑11 and SW620 lysate was used as input. For kinetics experiments the pre-incubation with 30 µM compound was performed over increasing time periods (0 min, 15 min, 30 min, 1 h, 2 h, 6 h, 8 h, 24 h at 4 °C and 0 min, 15 min, 30 min, 45 min, 1 h, 2 h, 4 h, 6 h, 8 h at 22 °C) followed by pulldown at 4 °C for 45 min or at 22 °C for 15 min.

**LC-MSMS measurement of (competition) pulldown assays.** Peptides were analyzed via LC-MS/MS on a Dionex Ultimate3000 nano HPLC coupled to an Orbitrap HF (Thermo Fisher Scientific) mass spectrometer. Peptides were loaded on a trap column (100 μm x 2 cm, packed in house with Reprosil-Gold C18 ODS-3 5 μm resin, Dr. Maisch, Ammerbuch) and washed with 5 μL/min solvent A (0.1 % formic acid in HPLC grade water) for 10 min. Peptides were then separated on an analytical column (75 μm x 40 cm, packed in house with Reprosil-Gold C18 3 μm resin, Dr. Maisch, Ammerbuch) using a 50 min gradient ranging from 4-32 % solvent B (0.1 % formic acid, 5 % DMSO in acetonitirile) in solvent A (0.1 % formic acid, 5 % DMSO in HPLC grade water) at a flow rate of 300 nL/min.

The mass spectrometer was operated in data dependent mode, automatically switching between MS1 and MS2 spectra. MS1 spectra were acquired over a mass-to-charge (m/z) range of 360-1300 m/z at a resolution of 60,000 (at m/z 200) in the Orbitrap using a maximum injection time of 10 ms and an automatic gain control (AGC) target value of 3e6. Up to 15 peptide precursors were isolated (isolation width of 1.7 Th, maximum injection time of 75 ms, AGC value of 1e5), fragmented by HCD using 25 % normalized collision energy (NCE) and analyzed in the Orbitrap at a resolution of 15,000. The dynamic exclusion duration of fragmented precursor ions was set to 30 s.

**(Competition) Pulldown assay protein identification and quantification.** Protein identification and quantification was performed using MaxQuant8 (v 1.6.1.0) by searching the LC-MS/MS data against all canonical protein sequences as annotated in the Swissprot reference database (v03.12.15, 20193 entries, downloaded 22.03.2016) using the embedded search engine Andromeda9. Carbamidomethylated cysteine was set as fixed modification and oxidation of methionine and N-terminal protein acetylation as variable modifications. Trypsin/P was specified as the proteolytic enzyme and up to two missed cleavage sites were allowed. Precursor tolerance was set to 10 ppm and fragment ion tolerance to 20 ppm. The minimum length of amino acids was set to seven and all data were adjusted to 1% PSM and 1% protein FDR. Label-free quantification10 and match between runs was enabled (except for search of experiment corresponding to Fig S1d). The mass spectrometry proteomics data have been deposited to the ProteomeXchange Consortium via the PRIDE11 partner repository with the dataset identifier PXD026657.

**(Competition) Pulldown assay data analysis.** For the competition assays, relative binding was calculated based on the protein intensity ratio to the DMSO control for every single inhibitor concentration. EC50 values were derived from a four-parameter log-logistic regression using an internal R script that utilizes the ‘drc’ package in R12. The obtained EC50 values were multiplied with a protein-dependent correction factor (cf), resulting in the apparent Kd value (Kdapp). The correction factor is determined by calculating the ratio of the protein intensity of two consecutive pulldowns of the vehicle control sample13. Correction factors were set to the median of correction factors derived from all competition assays (cfHDAC1=0.46, cfHDAC2=0.41, cfHDAC3=0.44, cfHDAC8=0.33, cfHDAC6=0.46, cfHDAC10=0.42, cfHDAC4=0.54, cfHDAC5=0.36, cfHDAC7=0.60, cfALDH2=0.38, cfISOC1=0.39, cfISOC2=0.32, cfGATD3A=0.46, cfMBLAC2=0.54). Targets of the inhibitors were annotated manually. A protein was considered a target or interactor of a target if the resulting binding curve showed a sigmoidal curve shape with a dose dependent decrease of binding to the beads. Additionally, the number of unique peptides and MSMS counts per condition were taken into account.

Heatmaps were generated using the R package ‘pheatmap’. Initial clustering of drugs for the target landscape was based on the relative affinities using the Euclidian distance measure.

For comparison of the novel affinity matrix iA to control beads and iQ, we used iBAQ intensities obtained from MaxQuant analysis. We only calculated fold changes for proteins that were detected in all replicates of the iA pulldown. For the iQ and control beads pulldown duplicates with one missing value we imputed the missing value by multiplying the iBAQ intensity of the valid value with the imputation factor of one plus the mean standard deviation over all replicates without missing values (1+mean(SD)), resulting in rather overestimated intensity of the protein in the control sample. To calculate the significance of the fold change, a t-test with Benjamini-Hochberg correction was applied. Proteins that have been identified in every replicate of the iA pulldown but in none of the iQ or control bead pulldown replicates are highly significant enriched targets, but cannot be assigned to actual values. Hence they are listed along an arbitrary high fold change value and set to an arbitrary low p-value for plotting with the other enriched proteins.

For kinetics experiments, we calculated the LFQ-intensity of different drug incubation time points divided by the intensity of the vehicle control PD of the same experiment. This relative binding to the beads was then plotted against the total incubation time (i.e. drug pre-incubation plus pulldown-incubation time) to give the binding kinetics curves.

**CATDS score calculation.** The CATDS (Concentration And Target Dependent Selectivity)14 is a defined as the target engagement for a specific target at defined concentration relative to the target engagement of all targets of the drug at this concentration and calculated as followed:

The target engagement can be directly read from the dose response profiles. A CATDS score of 1 means highest possible selectivity, i.e. only one target is hit by the drug (in the observed range).

**Screen for inhibitor-induced cell morphology.** 24 h after seeding SW620 in microtiter-plates at 3x103 cells/well, each compound was added in quadruplicates at 1 µM and 0.1 µM concentrations. Morphology of the cells was monitored for 60 h of compound exposure using an automated live cell imaging system (IncuCyte S3, Sartorius). The bright light images were processed by ilastik15, a supervised machine learning image analysis tool kit, in order to assign and quantify different morphotypes. The areas covered by the morphotypes (number of pixels) were used to calculate the fraction of each morphologies in the different wells.

**Palmitoyl-CoA hydrolysis assay.** MBLAC2 was expressed and purified from insect cells as previously described16. Palmitoyl-CoA was purchased from Sigma and stored at a stock concentration of 1 mM in 50 mM MES, pH 7.4 containing 0.05% DDM. [3H]-palmitoyl-CoA was synthesized using [3H-]palmitate (45 Ci/mmol, PerkinElmer Life Sciences), CoA (Sigma), and acyl CoA synthase (Sigma) as described17.

To screen for MBLAC2 palmitoyl-CoA hydrolase inhibitors, MBLAC2 (30 nM) was incubated with each inhibitor (300 nM) at 30 °C for 10 min. A reaction hot mix (RHM) was prepared by mixing non-radioactive palmitoyl CoA with [3H]-palmitoyl CoA to a final concentration of 6.25 µM (specific activity 4,000 dpm/pmol). The hydrolysis reaction was initiated by adding 200 µL of the RHM to 50 µL of the enzyme:inhibitor solution at 30 °C. The reaction was allowed to proceed for 10 min and then terminated with 0.5 mL of Dole’s reagent (2-propanol:heptane:1 M H2SO4, 25:5:1). The [3H]-palmitic acid product was isolated by extraction with 250 µL heptane followed by vigorously shaking for one hour. The organic layer collected was quantified by scintillation spectrometry. To determine the IC50 values for selected HDAC inhibitors, various concentrations of each inhibitor (3 µM to 1 pM) were prepared in 50 mM Tris, pH 7.4 prior to incubation with MBLAC2.

**Ceramidase Assay.** The ceramidase activity of MBLAC2 was evaluated by monitoring the hydrolysis of a fluorescent ceramide analog, C12-NBD-ceramide (Avanti Polar Lipids) as previously described18. Purified MBLAC2 (1 nM to 1 µM) or native cell lysate was incubated with C12-NBD-ceramide (1 µM) at 37 °C for up to 6 h. The reaction was terminated by boiling followed by solvent evaporation. The lipids were resuspended in 30 µL of chloroform/methanol (2:1, v/v) and applied to a TLC plate, which was developed with chloroform/methanol/25% ammonium hydroxide (90:20:0.5, v/v). Separation of the lipid mixture was visualized with Versadoc Imaging System (Alexa Fluor 488 filter).

**Knockdown of MBLAC2 in HEK293 cells**

Transfection was performed using the protocol from siPOOL Biotech (https://www.sitoolsbiotech.com/pdf/siPool%20Transfection%20Protocol.pdf) following the reverse transfection instructions and using a final concentration of 1 nM or 3 nM siRNA-POOL (30 MBLAC2 targeting siRNAs) for knockdown of MBLAC2 or 3 nM control-siRNA (Pool of 30 scrambled siRNAs). Lipofectamine RNAiMAX (Invitrogen, 13778-030) was used as transfection reagent. In brief, siRNAs were pre-diluted in Opti-MEM (Gibco) and combined with a pre-mixed Opti-MEM/RNAiMax dilution, incubated for 5 min at RT and transferred to the bottom of 6-well cell culture plates. Detached HEK293 cells were resuspended in DMEM containing 10% Exosome-depleted FBS (qualified one shot, Gibco, A27208-03) as FBS replacement (to avoid extracellular particle contamination stemming from FBS) and added to the transfection mix in 6-well plates to settle down for 10 min before transfer to the incubator (37 °C, 5% CO2, cell confluence of 15%). For the knockdown test with western blot readout, cells were incubated for 1,2 and 3 days before lysis. For every treatment duration, cells were transfected with 3 nM control siRNA POOL, 1 or 3 nM MBLAC2 siRNA POOL. For the proteomics and EV-counting experiment (in triplicates), knockdown cells were incubated for 3.5 d after siPOOL transfection, reaching 80% confluency. For lipidomics experiments (in triplicates) transfection and cultivation happened on glass dishes (to avoid plastics-derived contamination during planned lipid-extraction from attached cells).

**Treatment of HEK293 for exosome characterization.** HEK293 cells were seeded in 6-well cell culture dishes with a confluence of 15% and cultured in FBS-free DMEM (10% exosome-depleted FBS (Gibco, A27208-03)). After 4h cells were treated with ACY-775 or ACY738 (triplicates, 3 µM final concentration) for 3.5 days.

**Extracellular vesicle (EV) sample preparation and EV-counting.** Supernatants of ACY-775, ACY-738 treated and MBLAC2-siPOOL/control siRNA transfected HEK293 cells were collected and stored at -80 °C. Thawed supernatant samples were applied to qEV (35 nm, qEVoriginal, IZON) size exclusion chromatography to collect supernatant samples in the size range of extracellular vesicles. Briefly, the column was first washed and equilibrated with sterile PBS. Then, 1 mL of cell culture supernatant were pipetted onto the column and 0.5 mL fractions were collected in Eppendorf-reaction vessels. The fractions of column flow through (6-8, i.e. 3 - 4.5 mL of flow through after applying sample), that contain most particles in the size range of 30 - 150 nm were were analyzed using a NTA-particle tracker. Measurement of particle number and size distribution of EVs was performed using the scatter mode of a PMX110-Z ZetaView Nanoparticle Tracking Analyzer by Particle Metrix, equipped with a 520 nm laser. Two video cycles were recorded over all 11 positions in the measurement cell while the temperature was held constant at 24 °C. The following recommended parameters were used for the measurement: Sensitivity (80), Shutter (70), Frame rate (30), Min. Brightness (20), Max. Brightness (255), Min. Area (5), Max. Area (1000), Tracking radius (100), Min. Tracelength (15), nm/class (5) and classes/decade (64). Results were analyzed using the ZetaView Software Version 8.05.12 SP1 by Particle Metrix.

**Extracellular vesicle count data analysis.** The particle count data from NTA (binned in 5 nm diameter) for each fraction (6/7/8, fraction 7 containing most particles) of a replicate were summed up and normalized to the protein concentration of the corresponding replicate (as approximation for the cell volume; concentration determination by BCA assay, see below). The normalized particle size distributions of the replicates were plotted using GraphPad PRISM (v5.01).

**MBLAC2 western blot.** Protein lysates were generated by harvesting cells in lysis buffer (0.8% NP40, 50 mM Tris-HCl pH 7.5, 5% glycerol, 1.5 mM MgCl2, 150 mM NaCl, 1 mM Na3VO4, 25 mM NaF, 1 mM DTT and supplemented with protease inhibitors (SigmaFast, Sigma) and phosphatase inhibitors (prepared in-house according to Phosphatase inhibitor cocktail 1, 2 and 3 from Sigma-Aldrich)). The protein amount of cell lysates was determined by Bradford assay. Proteins were separated by SDS-PAGE and electro-transferred onto PVDF membranes. Blots were stored in Tris-buffered saline, supplemented with 0.05 % Tween (TBS-T) and 4 % BSA for 1 h at room temperature and then incubated with primary antibody against MBLAC2 (Abcam #ab122411, 0.2 mg/mL, rabbit polyclonal IgG; diluted 1:250 in TBS/0.05 % Tween, 5 % non-fat milk or BSA) and beta-Aktin (Santa Cruz Biotechnology #sc-47778, 0.2 mg/mL, monoclonal mouse IgG, diluted 1:500 in TBS/0.05 % Tween, 4% BSA) overnight at 4 ºC. Subsequently, blots were washed in TBS-T and probed with the corresponding fluorophore-conjugated secondary antibody (ODYSSEY donkey-anti-rabbit (#926-68023), goat-anti-mouse (#926-32210), 1:20,000 in TBS/0.05 % Tween, 4% BSA) for 3 h at room temperature. The immuno-reactive signals were detected by excitation of the respective fluorophore. Acquisition and quantification of the band intensities were carried out with the Odyssey (Licor) imaging system and corresponding software. Intensities of proteins were normalized to input beta-Actin and then normalized to the control siRNA POOL transfected samples of each treatment duration to calculate the relative MBLAC2 knockdown after 1,2 and 3 days of transfection.

**Deep proteome sample preparation**

**Protein Digestion**. After 3.5 days of transfection or drug treatment, HEK293 cells were washed with PBS and lysed by adding 100 µL lysis buffer (4% SDS in ddH2O) before scraping cells off the surface. Lysates were transferred to 2 mL eppendorf reaction vessels. To hydrolyse DNA and reduce viscosity, lysates were first diluted with 500 µL lysis buffer, heated at 95 °C for 10 min and then mixed with trifluoroacetic acid (TFA) to a final concentration of 2%19. Next, N-methylmorpholine (Sigma) was added to 4% (v/v) final concentration for neutralization. Protein concentration of lysates was determined using a standard BCA-assay protocol (PierceTM BCA Protein Assay kit, #23225).

Protein cleanup and digestion was performed according to an adapted SP3 protocol20. In brief, lysate volumes corresponding to 42 µg of protein were added to 5 µL Sera-Mag beads 1:1 mix (cat# GE45152105050250 and GE65152105050250, GE Healthcare) before adding ethanol to a final concentration of 80% (v/v) and incubating at RT for 15 min under constant shaking (800 rpm). Beads were then immobilized to reaction vessel wall by magnets and washed twice with 1 mL of 80% ethanol and once with 80% acetonitrile. Beads were resuspended in 70 µL of 50 mM HEPES buffer (pH = 8.5) and incubated with Dithiothreitol (DTT) (10 mM final concentration, 45 min at 37 °C, 600 rpm shaking) for reduction. Proteins were alkylated by adding chloroacetamide to a final concentration of 55 mM (30 min at RT, 600 rpm shaking in the dark). To digest the proteins, trypsin was added (trypsin:protein = 1:50) and incubated with beads at 37 °C and 800 rpm shaking for 16 h. Digested protein peptides were collected by immobilizing beads on vessel walls using magnets and transferring the peptide solution to eppendorf reaction vessels.

**StageTip Desalting21**. To construct a StageTip, six C18 disks were packed into a 200 µL pipette tip. The StageTips were activated with 200 µL acetonitrile (centrifugation at 1000 g), followed by washing with 200 µL Buffer B (0.1 % formic acid in 50 % acetonitirile) at 1000 g and equilibration by washing with 200 µL Buffer A (0.1% formic acid in ddH2O) at 1000 g. Peptide samples were acidified to a final concentration of ca. 1% formic acid (pH > 2) and loaded on StageTips with 500 g centrifugation. The loading step was repeated with the flow through. Peptides attached to the C18 material were washed twice with 200 µL buffer A and eluted by adding twice 40 µL of buffer B and collecting the flow through. The eluent was frozen at -80 °C and vacuum dried before further processing.

**TMT labelling**. Samples were reconstituted in 20 μL of 50 mM HEPES (pH = 8.5) and labelled with 100 μg (5 μL of 20 μg/μL) TMT10plex (Thermo Scientific, channel 126 was used for MBLAC2-KD and 127N was used for control replicates) for 1 h at 25 °C under 500 rpm constant shaking. The labelling reaction was stopped by adding 3 μL 5% Hydroxylamine in ddH2O. After combining TMT labelled samples in reaction vessel they were acidified with 20 μL of 10 % formic acid in ddH2O. Samples were frozen at -80 °C and vacuum dried before further processing.

**High-pH RP-HPLC fractionation**. In brief, the pooled TMT-labelled peptides were reconstituted in 50 μL Buffer A (25 mM ammonium bicarbonate, pH = 8) and separated using a Dionex Ultra 3000 HPLC system equipped with an Waters XBridge BEH130 C18 3.5 μm column (2.1 × 150 mm) operated at a flow rate of 200 µl/min with a constant 10% of 25 mm ammonium bicarbonate (pH = 8.0) in the running solvents. A 57 min linear gradient from 7 to 45% ACN in ddH2O followed by a 6 min linear gradient up to 80% ACN was employed. Ninety-six Fractions were collected and subsequently pooled to 48 fractions (fraction 1 + 49, fraction 2 + 50, and so on). Peptide fractions were frozen at −80 °C and dried by vacuum centrifugation.

**Full proteome LC-MSMS.** Peptides were analyzed via LC-MS/MS on a Dionex Ultimate3000 RSLCnano System equipped with a Vanquish pump module coupled to an Orbitrap Fusion Lumos (Thermo Fisher Scientific) mass spectrometer. Peptide fractions were dissolved in 1% FA and injected directly onto a commercially available Acclaim PepMap 100 C18 LC column (2 μm particle size, 1 mm ID × 150 mm; Thermo Fisher Scientific). Peptides were separated using a 25 min linear gradient ranging from 4-32 % solvent B (0.1 % formic acid, 3% DMSO in acetonitrile) in solvent A (0.1 % formic acid, 3% DMSO in HPLC grade water) at a flow rate of 50 µL/min.

The mass spectrometer was operated in data dependent mode, automatically switching between MS1, MS2 and MS3 spectra, with cycle time set to 1.2 s. MS1 spectra were acquired over a mass-to-charge (m/z) range of 360-1560 m/z at a resolution of 60,000 in the Orbitrap (OT) using a maximum injection time of 50 ms, an automatic gain control (AGC) target value of 4e5 and dynamic exclusion set to 50 s.

For MS2 spectra, the intensity threshold was set to 1E4, default charges were set to state 2–6. The isolation width was set to 0.6 m/z and HCD collision energy [%] was set to 32. The AGC target value was 1.2E4, and the first mass was fixed at 100 m/z. The Iontrap was used to detect the MS2 spectra with the rapid scan function. The maximum injection time was 40 ms. Regarding MS3-Filter, precursor selection range was set to 400–2000 and exclusion mass widths were set to 20 m/z for low and 5 m/z for high. For MS3 scans, Synchronous precursor selection was enabled, the number of SPS precursors was set to 8, the MS isolation window was 1.2 m/z, and HCD collision energy was 55%. The Orbitrap was used to detect the MS3 spectra at 50,000 resolution and over a scan range of 100–1000. The AGC target was 1E5 with a maximum IT of 86 ms.

The raw data was analyzed using MaxQuant8 (version 1.6.10.2) and default settings, except for minor changes: Isotope impurities of the TMT lot (#TE268169) were specified to allow MaxQuant the automated correction of TMT intensities. TMT-labelling modification was set for Lysine and N-terminal aminogroups and ITMS was set to a match tolerance of 0.4. For all searches, carbamidomethylated cysteine was set as fixed modification and oxidation of methionine and N-terminal protein acetylation as variable modifications. Trypsin/P was specified as the proteolytic enzyme with up to two missed cleavage sites allowed. Searches were based on canonical Swissprot reference database (v03.12.15, 20193 entries, downloaded 22.03.2016, annotated in-house with PFAM domains). The mass spectrometry proteomics data have been deposited to the ProteomeXchange Consortium via the PRIDE11 partner repository with the dataset identifier PXD026657.

**Full proteome data analysis.** For data analysis and visualization, mostly Microsoft Excel, GraphPad Prism (v5.01), RStudio (version [4.0.2]), and the Perseus software (v. 1.6.2.3) were used22-24. Firstly, all reversed hits and “only identified by site” protein entries were removed from the MaxQuant output. Then, the reporter intensities of channels 1,2 and 5 (i.e. TMT126, TMT127N, and TMT128C; corresponding to MBLAC2 knockdown, control siPOOL transfection and DMSO control) were log2 transformed and median-centered to the overall median of the respective dataset. Further, samples were adjusted with ComBat24 from the ´sva´ package (version [3.30.1]) to remove batch effects between replicates. Protein groups without missing values were analyzed in Perseus22, 23 (v1.6.2.2) by using the built-in two-sample t-test function and Benjamini-Hochberg multiple-testing correction (MBLAC2/control, S0 = 0.107, FDR = 1%). Resulting table containing fold changes, p and q values was exported and used to plot volcano plots in GraphPad PRISM (v5.01).

**Lipidomics sample preparation.** HEK293 were cultured on glass dishes for 45 h after transfection in DMEM (containing 10% exosome depleted FBS, Gibco, A27208-03) until they reached a confluency of 80%. The supernatant was discarded and cells were gently washed with PBS. For Lipid extraction, 500 μL of 2:1 (v:v) Methanol:Chloroform was pipetted twice onto cells in the glass dish and broken up cell fragments were collected in glass vials and sonicated for 10 min. After centrifugation to remove cell debris, extracted lipids were stored in extraction buffer at -80 °C until injection to LC-MSMS.

**Lipidomics LC-MSMS measurement.** The lipid analysis was performed using a Nexera UHPLC system (Shimadzu) coupled to a Q-TOF mass spectrometer (TripleTOF 6600, AB Sciex) according to a published analytical method25: Separation of the lipid extract was performed using a UPLC BEH C18 2.1x100, 1.7 µm analytical column (Waters Corp.) with 300 µL/min flow rate. The mobile phase was water/acetonitirile (40:60, v:v) with 10 mM ammonium formate and 0.1% formic acid (eluent A) and isopropanol/acetonitirile (90:10, v:v) with 10 mM ammonium formate and 0.1% formic acid (eluent B). The gradient profile was 32% B from 0 to 1.5 min raising to 97% B at 21 min, which was held for 4 min. Afterwards, the column was equilibrated at starting conditions. A volume of 5 µL per sample was injected. The autosampler was cooled to 10 °C and the column oven heated to 40 °C. The samples have been measured in the Information Dependent Acquisition (IDA) mode. MS settings in the positive mode were as follows: Gas 1 55, Gas 2 65, Curtain gas 35, Temperature 500 °C, Ion Spray Voltage 5500, declustering potential 80. The mass range of the TOF MS and MS/MS scans were 100 - 2000 m/z and the collision energy was set to 35 V with a 15 V spread. MS settings in the negative mode were as follows: Gas 1 55, Gas 2 65, Cur 35, Temperature 500 °C, Ion Spray Voltage -4500, declustering potential -80. The mass range of the TOF MS and MS/MS scans were 100 - 2000 m/z and the collision energy was set to -35 V with a 15 V spread.

**Lipidomics Data analysis.** Data was analyzed using MS-DIAL426 software (ver. 4.38). Raw files from positive and negative ion mode were analyzed separately and loaded as lipidomics profile data type. Changes or specifications regarding the default parameter settings were: Defining solvent type as HCOONH4, allowing all adduct types for all lipid classes for identification, and selecting adduct types for positive mode ([M+H]+, [M+NH4]+, [M+Na]+) or negative mode ( [M-H]-, [M-H2O-H]-, [M+FA-H]-).

Data from knockdown and control were aligned as class and normalized using the mTIC normalization function of MS-DIAL4. The raw MS-DIAL4 outputs for negative and positive mode were processed separately. Lipids that were present in less than half the samples or which showed a retention time of less than one minute were discarded. Additionally, only the lipids that were identified based on their MS2 spectrum were included in the further analysis. Quotient normalization27 as well as log2 transformation was applied to the data. For the volcano plots the log2 fold change between control and knockdown was calculated and a t-test was performed. The resulting p-values were adjusted for multiple testing using the Benjamini-Hochberg procedure supplied by the statsmodels package28. For visualization, t-test results of positive and negative mode data were combined and presented in a volcano plot generated in GraphPad Prism.

1. Mai, A. *et al.* Class II (IIa)-selective histone deacetylase inhibitors. 1. Synthesis and biological evaluation of novel (aryloxopropenyl)pyrrolyl hydroxyamides. *J Med Chem* **48**, 3344-3353 (2005).

2. Heimburg, T. *et al.* Structure-Based Design and Synthesis of Novel Inhibitors Targeting HDAC8 from Schistosoma mansoni for the Treatment of Schistosomiasis. *J Med Chem* **59**, 2423-2435 (2016).

3. Heimburg, T. *et al.* Structure-Based Design and Biological Characterization of Selective Histone Deacetylase 8 (HDAC8) Inhibitors with Anti-Neuroblastoma Activity. *J Med Chem* **60**, 10188-10204 (2017).

4. Bantscheff, M. *et al.* Chemoproteomics profiling of HDAC inhibitors reveals selective targeting of HDAC complexes. *Nat Biotechnol* **29**, 255-265 (2011).

5. Islam, M.N. *et al.* Bicyclic tetrapeptides as potent HDAC inhibitors: effect of aliphatic loop position and hydrophobicity on inhibitory activity. *Bioorg Med Chem* **22**, 3862-3870 (2014).

6. Pavlik, C.M. *et al.* Santacruzamate A, a potent and selective histone deacetylase inhibitor from the Panamanian marine cyanobacterium cf. Symploca sp. *J Nat Prod* **76**, 2026-2033 (2013).

7. Chen, K., Xu, L. & Wiest, O. Computational exploration of zinc binding groups for HDAC inhibition. *J Org Chem* **78**, 5051-5055 (2013).

8. Cox, J. & Mann, M. MaxQuant enables high peptide identification rates, individualized p.p.b.-range mass accuracies and proteome-wide protein quantification. *Nat Biotechnol* **26**, 1367-1372 (2008).

9. Cox, J. *et al.* Andromeda: a peptide search engine integrated into the MaxQuant environment. *J Proteome Res* **10**, 1794-1805 (2011).

10. Cox, J. *et al.* Accurate proteome-wide label-free quantification by delayed normalization and maximal peptide ratio extraction, termed MaxLFQ. *Mol Cell Proteomics* **13**, 2513-2526 (2014).

11. Perez-Riverol, Y. *et al.* The PRIDE database and related tools and resources in 2019: improving support for quantification data. *Nucleic Acids Res* **47**, D442-D450 (2019).

12. Ritz, C., Baty, F., Streibig, J.C. & Gerhard, D. Dose-Response Analysis Using R. *PLoS One* **10**, e0146021 (2015).

13. Medard, G. *et al.* Optimized chemical proteomics assay for kinase inhibitor profiling. *J Proteome Res* **14**, 1574-1586 (2015).

14. Klaeger, S. *et al.* The target landscape of clinical kinase drugs. *Science* **358** (2017).

15. Berg, S. *et al.* ilastik: interactive machine learning for (bio)image analysis. *Nat Methods* **16**, 1226-1232 (2019).

16. Malgapo, M.I.P., Safadi, J.M. & Linder, M.E. Metallo-beta-lactamase domain-containing protein 2 is S-palmitoylated and exhibits acyl-CoA hydrolase activity. *J Biol Chem* **296**, 100106 (2020).

17. Jennings, B.C. *et al.* 2-Bromopalmitate and 2-(2-hydroxy-5-nitro-benzylidene)-benzo[b]thiophen-3-one inhibit DHHC-mediated palmitoylation in vitro. *J Lipid Res* **50**, 233-242 (2009).

18. Okino, N., Tani, M., Imayama, S. & Ito, M. Purification and characterization of a novel ceramidase from Pseudomonas aeruginosa. *J Biol Chem* **273**, 14368-14373 (1998).

19. Dagley, L.F., Infusini, G., Larsen, R.H., Sandow, J.J. & Webb, A.I. Universal Solid-Phase Protein Preparation (USP(3)) for Bottom-up and Top-down Proteomics. *J Proteome Res* **18**, 2915-2924 (2019).

20. Hughes, C.S. *et al.* Single-pot, solid-phase-enhanced sample preparation for proteomics experiments. *Nat Protoc* **14**, 68-85 (2019).

21. Rappsilber, J., Mann, M. & Ishihama, Y. Protocol for micro-purification, enrichment, pre-fractionation and storage of peptides for proteomics using StageTips. *Nat Protoc* **2**, 1896-1906 (2007).

22. Tyanova, S. & Cox, J. Perseus: A Bioinformatics Platform for Integrative Analysis of Proteomics Data in Cancer Research. *Methods Mol Biol* **1711**, 133-148 (2018).

23. Tyanova, S. *et al.* The Perseus computational platform for comprehensive analysis of (prote)omics data. *Nat Methods* **13**, 731-740 (2016).

24. Johnson, W.E., Li, C. & Rabinovic, A. Adjusting batch effects in microarray expression data using empirical Bayes methods. *Biostatistics* **8**, 118-127 (2007).

25. Witting, M., Maier, T.V., Garvis, S. & Schmitt-Kopplin, P. Optimizing a ultrahigh pressure liquid chromatography-time of flight-mass spectrometry approach using a novel sub-2mum core-shell particle for in depth lipidomic profiling of Caenorhabditis elegans. *J Chromatogr A* **1359**, 91-99 (2014).

26. Tsugawa, H. *et al.* A lipidome atlas in MS-DIAL 4. *Nat Biotechnol* **38**, 1159-1163 (2020).

27. Dieterle, F., Ross, A., Schlotterbeck, G. & Senn, H. Probabilistic quotient normalization as robust method to account for dilution of complex biological mixtures. Application in 1H NMR metabonomics. *Anal Chem* **78**, 4281-4290 (2006).

28. Seabold, S., Perktold, J. Statsmodels: Econometric and statistical modeling with python. *Proceedings of the 9th Python in Science Conference* (2010).
