# Supplementary material for: Target deconvolution of HDAC pharmacopoeia highlights MBLAC2 as common off-target
Source: Research Square preprint supplement (doi:10.21203/rs.3.rs-646613/v1), 2021-07-12
Supplement: Supplementary file 8 [file efede3d4141c0d1854a07ce9.xlsx]

## Sheet: Sheet1
			#!{C:Group1}MBLAC2_KD	control_KD	DMSO	MBLAC2_KD	control_KD	DMSO	MBLAC2_KD	control_KD	DMSO	MBLAC2 siRNA/control siRNA				MBLAC2 siRNA/DMSO				DMSO/control siRNA
Gene_names	Majority_protein_ID	Protein_names	1_R1	2_R1	5_R1	1_R2	2_R2	5_R2	1_R3	2_R3	5_R3	-Log Student's T-test p-value MBLAC2_KD_control_KD	Student's T-test q-value MBLAC2_KD_control_KD	-log10 q value	Student's T-test Difference MBLAC2_KD_control_KD	-Log Student's T-test p-value MBLAC2_KD_DMSO	Student's T-test q-value MBLAC2_KD_DMSO	-log10 q	Student's T-test Difference MBLAC2_KD_DMSO	-Log Student's T-test p-value DMSO_control_KD	Student's T-test q-value DMSO_control_KD	-LOG10 q	Student's T-test Difference DMSO_control_KD
RBM47	A0AV96	RNA-binding protein 47	12.6689	13.5955	13.3743	13.0464	13.4997	13.0676	13.0671	13.6343	12.9375	2.06039	0.054182	1.26614	-0.64907	0.470999	0.480893	0.317951	-0.199039	1.53242	0.114559	0.940972	-0.450031
TTC26	A0AVF1	Intraflagellar transport protein 56	17.9834	18.2379	18.1868	18.1712	18.1912	18.0568	17.9219	18.3157	18.1541	1.25473	0.162635	0.788786	-0.222779	0.562061	0.417209	0.379647	-0.107084	1.0183	0.237498	0.62434	-0.115695
UBA6	A0AVT1	Ubiquitin-like modifier-activating enzyme 6	21.6994	21.889	21.8657	21.7567	21.8289	21.8844	21.7015	21.8955	21.8732	2.23459	0.0438968	1.35757	-0.151915	2.8678	0.0189069	1.72338	-0.155219	0.0519172	0.938228	0.0276916	0.0033048
ESYT2	A0FGR8	Extended synaptotagmin-2	20.1498	20.1983	20.3415	20.2446	20.118	20.3189	20.1642	20.1976	20.3476	0.138788	0.836758	0.0774	0.0149186	2.08511	0.0459256	1.33795	-0.149789	2.37706	0.0418051	1.37877	0.164707
KIAA1598	A0MZ66	Shootin-1	20.1802	20.0833	19.8373	20.1221	20.1233	19.8634	20.1779	20.0186	19.9332	1.11248	0.201294	0.696169	0.0849984	2.92167	0.0179229	1.74659	0.282125	2.03528	0.060413	1.21887	-0.197127
TMEM223	A0PJW6	Transmembrane protein 223	16.3944	16.4028	16.3148	16.4086	16.3377	16.458	16.3845	16.3794	16.3792	0.481198	0.512553	0.290261	0.0224838	0.101256	0.863643	0.0636657	0.0118357	0.0826198	0.90447	0.043606	0.0106481
ARHGAP10	A1A4S6	Rho GTPase-activating protein 10	15.6697	15.559	15.4439	15.6794	15.4786	15.4284	15.6967	15.5812	15.4672	1.94232	0.0624033	1.20479	0.14236	4.16347	0.00646613	2.18936	0.235418	1.31576	0.154862	0.810056	-0.0930586
MEX3A	A1L020	RNA-binding protein MEX3A	16.8574	16.9381	16.8089	16.9483	16.8689	16.8003	16.8953	16.9066	16.8294	0.0428821	0.944074	0.0249941	-0.00416247	1.46422	0.103175	0.986427	0.0875003	1.86628	0.0739783	1.1309	-0.0916627
ILVBL	A1L0T0	Acetolactate synthase-like protein	19.707	19.7773	19.9429	19.7605	19.735	19.9732	19.8001	19.7182	19.9548	0.142914	0.832557	0.0795858	0.0124009	2.6796	0.022365	1.65043	-0.201084	3.38816	0.0165899	1.78016	0.213485
PLEKHG3	A1L390	Pleckstrin homology domain-containing family G member 3	12.5975	12.2645	12.2625	12.4299	12.5317	12.2852	12.3687	12.5184	12.4639	0.0871778	0.895849	0.0477652	0.0271594	0.616011	0.381181	0.418869	0.128185	0.396132	0.592793	0.227097	-0.101026
SH3PXD2B	A1X283	SH3 and PX domain-containing protein 2B	19.7066	19.5807	19.6224	19.6962	19.57	19.6425	19.7112	19.5488	19.6253	3.73612	0.00947945	2.02322	0.138145	3.19866	0.0149543	1.82524	0.0745818	2.31271	0.0442019	1.35456	0.063563
NBAS	A2RRP1	Neuroblastoma-amplified sequence	18.0087	18.1372	18.0397	18.1019	18.0033	18.1481	18.0286	18.1108	18.0758	0.305428	0.665313	0.176974	-0.037351	0.413168	0.527828	0.277507	-0.0414524	0.0264987	0.96865	0.0138333	0.00410144
TARSL2	A2RTX5	Probable threonine--tRNA ligase 2, cytoplasmic	18.0991	18.1395	18.1818	18.1623	18.0723	18.2154	18.0794	18.1451	18.1772	0.0533961	0.934781	0.0292903	-0.00530879	1.31343	0.130509	0.884358	-0.0778287	1.29212	0.160321	0.795009	0.0725199
KIAA1467	A2RU67	Uncharacterized protein KIAA1467	14.3173	14.4684	14.9433	14.4909	14.4864	14.8012	14.4834	14.6124	14.6702	0.562023	0.455827	0.3412	-0.0918617	1.73907	0.071065	1.14834	-0.374361	1.44351	0.128707	0.890398	0.2825
TYW5	A2RUC4	tRNA wybutosine-synthesizing protein 5	13.9422	13.8154	13.8132	13.944	13.9314	13.7445	13.9111	13.6876	13.9905	0.78347	0.329091	0.482685	0.12098	0.48835	0.467833	0.329909	0.0830555	0.137894	0.842649	0.0743532	0.0379241
FUOM	A2VDF0	Fucose mutarotase	14.1792	14.1928	14.6463	14.317	14.184	14.5979	14.2013	14.5228	14.3861	0.219821	0.749938	0.124974	-0.0673596	1.57652	0.0882396	1.05434	-0.310945	0.822593	0.315459	0.501057	0.243585
KIAA0922	A2VDJ0	Transmembrane protein 131-like	14.4947	14.2707	14.3156	14.5975	14.1555	14.2865	14.4531	14.543	14.0578	0.715513	0.361181	0.442275	0.19201	1.48395	0.100244	0.99894	0.295094	0.296801	0.683181	0.165464	-0.103084
VWA8	A3KMH1	von Willebrand factor A domain-containing protein 8	19.1415	19.1224	19.1849	19.1731	19.1036	19.175	19.0901	19.2186	19.1532	0.111997	0.867868	0.0615463	-0.0133057	0.627188	0.374474	0.426579	-0.0361379	0.245019	0.73603	0.133105	0.0228322
SBNO1	A3KN83	Protein strawberry notch homolog 1	19.808	19.7582	19.7851	19.8112	19.7513	19.8068	19.773	19.8005	19.7966	0.627689	0.412327	0.384758	0.0274162	0.0298802	0.956879	0.019143	0.00122388	0.721433	0.370454	0.431266	0.0261923
GTPBP10	A4D1E9	GTP-binding protein 10	19.3012	19.5304	19.5913	19.3668	19.5167	19.5178	19.3	19.5152	19.6002	3.03031	0.0182706	1.73825	-0.198059	2.71134	0.0216729	1.66408	-0.247131	0.8587	0.298387	0.525221	0.0490716
WDR91	A4D1P6	WD repeat-containing protein 91	18.4996	18.4383	18.3861	18.4928	18.4098	18.4376	18.4537	18.5101	18.355	0.370676	0.603261	0.219495	0.0292931	1.47534	0.101466	0.99368	0.0891209	0.71278	0.37502	0.425945	-0.0598278
KLRG2	A4D1S0	Killer cell lectin-like receptor subfamily G member 2	18.0054	17.8122	17.7861	17.9366	17.8229	17.8327	17.9766	17.7371	17.8842	2.25166	0.0433415	1.3631	0.182159	1.79151	0.0664409	1.17756	0.138538	0.484711	0.523152	0.281372	0.0436211
LCHN	A4D1U4	Protein LCHN	15.3272	15.7264	15.6195	15.4181	15.5185	15.6913	15.3202	15.7744	15.5782	1.70272	0.0865165	1.0629	-0.317918	2.41304	0.0294807	1.53046	-0.274487	0.195814	0.78037	0.107699	-0.0434316
VPS37C	A5D8V6	Vacuolar protein sorting-associated protein 37C	15.507	15.4043	15.4622	15.5509	15.3808	15.3677	15.5897	15.4579	15.6472	1.8229	0.073541	1.13347	0.134919	0.265591	0.66927	0.174399	0.0568336	0.38594	0.602121	0.220316	0.0780856
TRAPPC13	A5PLN9	Trafficking protein particle complex subunit 13	17.6635	17.6165	17.6879	17.7067	17.58	17.6363	17.6539	17.7156	17.6409	0.355887	0.615495	0.210776	0.0373338	0.353562	0.58371	0.233803	0.0196813	0.150471	0.828216	0.0818562	0.0176525
CNOT1	A5YKK6	CCR4-NOT transcription complex subunit 1	22.2116	22.1931	22.2165	22.2705	22.1384	22.2029	22.181	22.2468	22.1848	0.278677	0.690104	0.161085	0.0283051	0.285513	0.647006	0.189092	0.0196737	0.0945648	0.891585	0.0498374	0.00863139
PALM3	A6NDB9	Paralemmin-3	14.1982	13.859	14.1638	13.977	13.725	14.3625	14.2108	13.7311	14.131	1.81948	0.0738675	1.13155	0.356979	0.359314	0.578495	0.2377	-0.0904125	2.21406	0.0488784	1.31088	0.447391
PGP	A6NDG6	Phosphoglycolate phosphatase	20.5001	20.5578	20.5148	20.5141	20.5813	20.5248	20.5197	20.5858	20.5052	2.43385	0.0348744	1.45749	-0.0636438	0.168585	0.777794	0.109135	-0.00363413	2.35537	0.0425752	1.37084	-0.0600096
C5orf51	A6NDU8	UPF0600 protein C5orf51	17.1794	17.311	17.4516	17.2866	17.2831	17.424	17.2204	17.3319	17.3112	1.09548	0.206376	0.68534	-0.0798766	1.45825	0.104061	0.982714	-0.166818	0.896513	0.282758	0.548585	0.0869414
RCCD1	A6NED2	RCC1 domain-containing protein 1	16.0431	16.2663	16.0306	16.0248	16.2775	16.0834	16.1429	16.1244	16.2255	1.16709	0.18525	0.732241	-0.152498	0.24675	0.68894	0.161819	-0.0429211	0.649761	0.41037	0.386825	-0.109577
TCAF2	A6NFQ2	TRPM8 channel-associated factor 2	11.6849	12.3511	11.6549	11.8979	11.4153	12.3591	11.3489	12.0965	12.3242	0.409639	0.568505	0.245266	-0.310415	0.77322	0.295507	0.529433	-0.468849	0.16517	0.8136	0.0895891	0.158435
TUBAL3	A6NHL2	Tubulin alpha chain-like 3	13.8849	14.6092	14.262	14.0242	14.3774	14.2648	13.8336	14.5221	14.363	2.57852	0.0296998	1.52725	-0.588668	2.35782	0.0317277	1.49856	-0.38242	1.28408	0.161533	0.791738	-0.206248
FBLL1	A6NHQ2	rRNA/tRNA 2-O-methyltransferase fibrillarin-like protein 1	19.4018	19.5806	19.6454	19.5779	19.36	19.5969	19.3591	19.732	19.5499	0.365798	0.607529	0.216433	-0.111253	0.978003	0.215854	0.66584	-0.151111	0.131516	0.849858	0.0706534	0.0398579
SMCHD1	A6NHR9	Structural maintenance of chromosomes flexible hinge domain-containing protein 1	21.5005	21.6952	21.5986	21.497	21.6566	21.6282	21.4882	21.6895	21.6019	3.90667	0.00847828	2.07169	-0.185165	3.46498	0.0114745	1.94027	-0.114297	2.01373	0.0621341	1.20667	-0.0708675
GATSL2	A6NHX0	GATS-like protein 2	15.3457	15.5716	15.5486	15.6094	15.4296	15.4068	15.3431	15.656	15.4933	0.46988	0.520631	0.28347	-0.119683	0.197917	0.744172	0.128327	-0.0501734	0.37412	0.612448	0.21293	-0.0695095
UNC119B	A6NIH7	Protein unc-119 homolog B	19.0323	19.0938	19.1587	18.9892	19.0791	19.2394	19.0786	19.0252	19.2122	0.419033	0.560135	0.251707	-0.0326277	2.07941	0.0462969	1.33445	-0.170064	1.91674	0.0702675	1.15325	0.137436
METTL15	A6NJ78	Probable methyltransferase-like protein 15	17.137	17.0278	17.2463	17.2392	17.0116	17.1486	17.1685	17.1038	17.1513	1.49291	0.116337	0.934282	0.13383	0.0036999	0.995015	0.00217058	-0.00049909	1.45384	0.126835	0.896759	0.134329
LIPT2	A6NK58	Putative lipoyltransferase 2, mitochondrial	11.4906	11.4725	12.427	11.8828	11.8691	11.6171	11.3043	12.1338	11.971	0.444795	0.539244	0.268215	-0.265903	0.701517	0.330008	0.481476	-0.445804	0.233023	0.74651	0.126964	0.1799
CCDC85C	A6NKD9	Coiled-coil domain-containing protein 85C	17.7253	17.672	17.4224	17.6353	17.6427	17.5122	17.7244	17.5858	17.4796	0.718388	0.359717	0.444039	0.0614821	2.30878	0.0336526	1.47298	0.223626	1.94866	0.0676622	1.16965	-0.162144
SAC3D1	A6NKF1	SAC3 domain-containing protein 1	16.1816	16.1576	16.2632	16.3121	16.069	16.2733	16.3349	16.0347	16.2704	1.4591	0.122139	0.913145	0.189107	0.0521079	0.925585	0.0335836	0.00724665	2.11045	0.0550948	1.25889	0.181861
RGPD3	A6NKT7	RanBP2-like and GRIP domain-containing protein 3	18.071	18.0639	17.8674	18.0413	17.8957	18.0212	17.9898	18.092	17.9199	0.0911489	0.891525	0.0498667	0.0168114	0.894991	0.244463	0.611788	0.0978699	0.45987	0.542496	0.265603	-0.0810585
ZSWIM8	A7E2V4	Zinc finger SWIM domain-containing protein 8	14.431	14.3176	14.2028	14.2374	14.0622	14.5221	14.4476	14.0741	14.3937	0.964641	0.25123	0.599929	0.220718	0.00247409	0.996638	0.00146276	-0.000868797	0.823841	0.315018	0.501664	0.221587
TBKBP1	A7MCY6	TANK-binding kinase 1-binding protein 1	11.3386	11.9803	11.6148	11.3744	11.9754	11.4618	11.8399	11.3931	11.5985	0.45132	0.535386	0.271333	-0.26529	0.0856884	0.88409	0.0535037	-0.0407391	0.486511	0.521733	0.282552	-0.224551
DDX11L8	A8MPP1	Putative ATP-dependent RNA helicase DDX11-like protein 8;Putative ATP-dependent RNA helicase DDX12	17.0902	16.9954	16.0609	16.9509	17.0967	15.9597	16.9088	17.0515	16.0703	0.44661	0.538449	0.268855	-0.0645568	3.8931	0.00792475	2.10101	0.953005	4.60837	0.007619	2.1181	-1.01756
FAM171A2	A8MVW0	Protein FAM171A2	13.6814	13.2324	13.0522	13.2244	13.4677	13.119	13.2738	13.1036	13.5816	0.280418	0.688359	0.162185	0.125291	0.256321	0.67853	0.168431	0.142242	0.0288258	0.965863	0.0150846	-0.0169516
PHF20L1	A8MW92	PHD finger protein 20-like protein 1	13.7907	13.9761	13.9179	14.0035	13.4246	14.0153	13.9082	13.7884	13.8852	0.421076	0.558846	0.252708	0.171069	0.204856	0.73706	0.132497	-0.0386731	0.558466	0.469996	0.327906	0.209742
NUDT19	A8MXV4	Nucleoside diphosphate-linked moiety X motif 19, mitochondrial	18.0156	18.0881	17.9864	17.9232	18.1187	18.0442	17.9629	18.005	18.09	1.12349	0.197704	0.703986	-0.103363	0.842813	0.264532	0.577521	-0.0729752	0.268249	0.711731	0.147684	-0.0303879
MIF4GD	A9UHW6	MIF4G domain-containing protein	16.8636	17.091	17.1693	16.9407	17.0645	17.1583	17.0416	16.8956	17.1089	0.355783	0.61551	0.210765	-0.0683861	1.64055	0.0813052	1.08988	-0.196835	0.939443	0.266971	0.573536	0.128449
HACD1	B0YJ81	Very-long-chain (3R)-3-hydroxyacyl-CoA dehydratase 1	12.4231	11.3284	11.5991	11.7549	11.2897	12.1276	12.1241	11.4175	11.7001	1.7325	0.0836858	1.07735	0.755517	0.506404	0.454862	0.34212	0.291787	1.3061	0.157118	0.803775	0.46373
LOC93622	B2RBV5		12.8989	12.2661	12.9942	12.6679	12.6684	12.8039	12.8786	12.4744	12.794	1.18	0.181773	0.74047	0.345484	0.190136	0.751671	0.123972	-0.0489235	1.38195	0.140214	0.853208	0.394407
MYO9A	B2RTY4	Unconventional myosin-IXa	14.629	14.7734	14.9439	14.8352	14.6576	14.8479	14.9334	14.6594	14.7973	0.452312	0.534277	0.272233	0.102409	0.254998	0.680015	0.167482	-0.0638323	1.3502	0.147143	0.832261	0.166242
TMEM114	B3SHH9	Transmembrane protein 114	14.2302	14.3605	14.092	14.0947	14.3181	14.37	14.2477	14.2525	14.2131	0.970611	0.248935	0.603915	-0.119502	0.134154	0.818755	0.0868463	-0.0341791	0.421071	0.572078	0.242545	-0.0853233
RABGAP1L	B7ZAP0	Rab GTPase-activating protein 1-like, isoform 10	18.1061	18.0273	18.4533	18.1159	17.9928	18.3995	18.1032	18.1893	18.2558	0.252279	0.716965	0.144502	0.0385958	1.93892	0.0548784	1.2606	-0.261115	1.62189	0.102277	0.990221	0.299711
WASH3P	C4AMC7	Putative WAS protein family homolog 3;WAS protein family homolog 2;WAS protein family homolog 1	18.6904	18.6749	18.5578	18.6719	18.6342	18.6008	18.6369	18.731	18.5478	0.159374	0.81458	0.0890662	-0.0136515	1.90385	0.0571075	1.24331	0.097592	1.57635	0.10829	0.96541	-0.111244
FAM195B	C9JLW8	Protein FAM195B	17.6506	17.7384	17.6923	17.6053	17.7257	17.7499	17.7102	17.7114	17.6915	1.04526	0.221426	0.654772	-0.0697842	0.707869	0.326741	0.485796	-0.0558338	0.267565	0.712455	0.147242	-0.0139503
C11orf98	E9PRG8	Uncharacterized protein C11orf98	17.5616	17.5154	17.3067	17.5174	17.4247	17.4177	17.5802	17.4272	17.3825	1.29689	0.15303	0.815224	0.0972595	2.09103	0.0454822	1.34216	0.184086	0.915716	0.275331	0.560144	-0.0868263
DNASE2	O00115	Deoxyribonuclease-2-alpha	19.061	18.8998	19.0572	19.0516	18.9728	18.9829	19.0259	19.0402	18.9433	0.833234	0.306378	0.513742	0.0752462	0.6707	0.347782	0.458693	0.0517343	0.169023	0.810229	0.0913924	0.0235119
AGPS	O00116	Alkyldihydroxyacetonephosphate synthase, peroxisomal	22.0387	22.1968	22.1114	22.0618	22.1815	22.1142	22.0728	22.1142	22.1743	1.75585	0.0811107	1.09092	-0.10642	1.52798	0.0936355	1.02856	-0.0755641	0.40044	0.589019	0.229871	-0.0308558
UBXN8	O00124	UBX domain-containing protein 8	14.8124	14.5243	14.5483	14.7973	14.4517	14.6097	14.7556	14.5675	14.5815	2.71477	0.0256473	1.59096	0.273907	2.9764	0.0174639	1.75786	0.208577	0.790216	0.332829	0.477778	0.0653292
KIF2A	O00139	Kinesin-like protein KIF2A	20.8989	20.9522	20.9917	20.9485	20.9238	20.9944	20.9564	20.9186	20.9838	0.0501771	0.93811	0.0277464	0.00304159	1.41141	0.112202	0.949999	-0.0553881	2.23138	0.0478163	1.32042	0.0584297
DDX39A	O00148	ATP-dependent RNA helicase DDX39A	21.0469	21.1768	21.2071	21.139	21.118	21.2017	21.1541	21.0171	21.2486	0.0562047	0.931745	0.030703	0.00934664	1.35093	0.123251	0.909209	-0.10585	1.10684	0.208045	0.681844	0.115196
PDLIM1	O00151	PDZ and LIM domain protein 1	21.9207	21.8261	21.8107	21.7735	21.8308	21.9298	21.9567	21.6915	21.8857	0.627792	0.412327	0.384758	0.100798	0.0423836	0.938835	0.0274109	0.00820223	0.739924	0.359855	0.443872	0.0925961
ACOT7	O00154	Cytosolic acyl coenzyme A thioester hydrolase	20.8377	20.8138	20.9916	20.8576	20.7528	21.0233	20.8662	20.6753	21.0518	1.22182	0.170108	0.769275	0.106561	3.02013	0.0169384	1.77113	-0.168366	2.48655	0.0364745	1.43801	0.274927
MYO1C	O00159	Unconventional myosin-Ic	21.0468	21.2354	21.0937	21.1239	21.2036	21.0409	21.0268	21.2283	21.1172	2.13487	0.0494164	1.30613	-0.156622	0.185987	0.756571	0.12115	-0.01813	2.31555	0.0441472	1.3551	-0.138492
SNAP23	O00161	Synaptosomal-associated protein 23	19.982	20.2212	20.0524	19.8894	20.2219	20.1559	20.0247	20.0498	20.1379	1.33337	0.145154	0.838171	-0.198917	1.37049	0.119355	0.923159	-0.150033	0.303399	0.676096	0.169992	-0.0488841
HAX1	O00165	HCLS1-associated protein X-1	19.6694	19.8167	19.7116	19.6641	19.8051	19.7418	19.7145	19.6431	19.8052	0.549118	0.464181	0.333313	-0.0723146	1.03371	0.198399	0.702461	-0.0702051	0.0111398	0.986734	0.00579984	-0.00210953
AIP	O00170	AH receptor-interacting protein	21.5535	21.5469	21.7209	21.5338	21.5046	21.7587	21.6122	21.4799	21.727	0.850437	0.298464	0.525107	0.056022	2.52124	0.0258969	1.58675	-0.169048	3.22859	0.0179869	1.74504	0.22507
GTPBP1	O00178	GTP-binding protein 1	21.228	20.9811	20.9752	21.2502	20.9503	20.9328	21.2225	20.8845	21.0504	3.23915	0.0153005	1.8153	0.294959	2.6572	0.0228615	1.6409	0.247456	0.459578	0.542742	0.265407	0.0475038
STXBP3	O00186	Syntaxin-binding protein 3	20.8459	21.0729	20.9054	20.8359	21.0045	20.9847	20.8661	21.04	20.9612	3.03012	0.0182706	1.73825	-0.189834	1.80096	0.0657612	1.18203	-0.101138	1.35076	0.147089	0.832421	-0.0886955
AP4M1	O00189	AP-4 complex subunit mu-1	14.5179	14.5702	14.7315	14.4396	14.6386	14.7229	14.3975	14.7872	14.6788	1.36504	0.139357	0.85587	-0.213687	2.58225	0.0243584	1.61335	-0.259418	0.278074	0.701538	0.153949	0.0457315
ARVCF	O00192	Armadillo repeat protein deleted in velo-cardio-facial syndrome	15.9696	15.7398	15.7007	15.8782	15.6759	15.8819	16.0229	15.6548	15.7357	2.2446	0.0435279	1.36123	0.266724	1.23936	0.145237	0.837922	0.184133	0.605698	0.438927	0.357608	0.0825907
SMAP	O00193	Small acidic protein	19.7392	19.7859	19.677	19.4827	19.8701	19.7796	19.9461	19.3666	19.8748	0.0835475	0.900662	0.045438	0.0484956	0.138057	0.814492	0.0891129	-0.0544319	0.245278	0.73603	0.133105	0.102928
AP3B1	O00203	AP-3 complex subunit beta-1	21.2587	21.3779	21.4473	21.338	21.3258	21.4215	21.2288	21.4484	21.3919	1.06141	0.216564	0.664415	-0.108889	1.79023	0.0664834	1.17729	-0.145049	0.391559	0.596393	0.224468	0.0361602
APBB1	O00213	Amyloid beta A4 precursor protein-binding family B member 1	17.6483	17.507	17.7753	17.6784	17.464	17.7411	17.6611	17.5358	17.7318	2.68092	0.0262718	1.58051	0.160339	2.26682	0.0360339	1.44329	-0.0867621	3.25208	0.0179292	1.74644	0.247101
NDUFS8	O00217	NADH dehydrogenase [ubiquinone] iron-sulfur protein 8, mitochondrial	20.6648	20.6467	20.6012	20.789	20.5514	20.6141	20.6163	20.7515	20.5658	0.199917	0.771703	0.11255	0.0401745	0.836144	0.267544	0.572604	0.0963122	0.398548	0.590544	0.228748	-0.0561377
NFKBIE	O00221	NF-kappa-B inhibitor epsilon	15.7514	15.6828	15.8806	15.7213	15.7441	15.7967	15.8213	15.6175	15.8727	0.819056	0.312798	0.504736	0.0832218	1.00245	0.208183	0.681555	-0.0852823	1.68889	0.0938014	1.02779	0.168504
PSMD11	O00231	26S proteasome non-ATPase regulatory subunit 11	22.4804	22.7158	22.5346	22.5833	22.6681	22.4802	22.5037	22.6232	22.6093	1.63122	0.0958225	1.01853	-0.146583	0.144066	0.808646	0.0922413	-0.0189082	1.30051	0.158445	0.800123	-0.127675
PSMD12	O00232	26S proteasome non-ATPase regulatory subunit 12	22.1215	22.3076	22.3103	22.2089	22.2951	22.2393	22.1257	22.3276	22.3062	2.20801	0.0455217	1.34178	-0.158059	1.6587	0.0792175	1.10118	-0.133211	0.426262	0.569272	0.24468	-0.0248483
PSMD9	O00233	26S proteasome non-ATPase regulatory subunit 9	19.3923	19.347	19.4707	19.3645	19.3743	19.4822	19.441	19.3068	19.4678	0.885874	0.282661	0.548734	0.056558	1.50722	0.0966293	1.01489	-0.0742906	2.54122	0.0345207	1.46192	0.130849
ATOX1	O00244	Copper transport protein ATOX1	19.1692	19.3387	19.4646	19.1716	19.3139	19.4488	19.3819	19.0029	19.5225	0.0602905	0.928575	0.0321831	0.0224349	1.48877	0.0994799	1.00226	-0.237755	1.10888	0.207399	0.683193	0.26019
MEN1	O00255	Menin	17.0517	17.1523	17.2318	17.1096	17.1946	17.0957	17.0627	17.2604	17.1135	1.6185	0.097436	1.01128	-0.12773	0.714453	0.323341	0.490339	-0.0723267	0.449345	0.550358	0.259355	-0.0554034
CBX4	O00257	E3 SUMO-protein ligase CBX4	16.9509	17.1457	16.8899	16.8287	17.1879	17.0129	16.8982	17.043	17.0945	1.8569	0.0699761	1.15505	-0.232947	0.701932	0.329921	0.48159	-0.106505	0.795558	0.32993	0.481578	-0.126442
PGRMC1	O00264	Membrane-associated progesterone receptor component 1	22.8225	22.6597	22.7886	22.7631	22.6658	22.7765	22.7752	22.6322	22.7807	2.5248	0.031516	1.50147	0.134371	0.0982506	0.866935	0.0620134	0.00506083	3.53453	0.0149864	1.8243	0.129311
SUPT5H	O00267	Transcription elongation factor SPT5	21.5472	21.7273	21.6133	21.5784	21.699	21.6154	21.5953	21.6106	21.6835	1.30394	0.151469	0.819677	-0.105364	1.10887	0.176378	0.753556	-0.0637741	0.421915	0.571674	0.242852	-0.0415897
TAF4	O00268	Transcription initiation factor TFIID subunit 4	17.9907	17.8796	17.9457	17.9952	17.8115	17.9523	18.0318	17.8111	17.9968	2.55251	0.0304025	1.51709	0.171815	0.926019	0.233015	0.632616	0.04094	2.03134	0.0607611	1.21637	0.130875
DFFA	O00273	DNA fragmentation factor subunit alpha	20.3401	20.8251	20.5961	20.3396	20.8015	20.6048	20.3983	20.6932	20.649	3.10798	0.0174674	1.75777	-0.413921	3.26769	0.0139626	1.85503	-0.257276	1.63346	0.100853	0.996311	-0.156645
RFXAP	O00287	Regulatory factor X-associated protein	16.3821	16.1999	16.1374	16.2005	16.2146	16.2647	16.3247	16.2249	16.1545	0.759396	0.339267	0.469459	0.0893021	0.809244	0.278435	0.555277	0.116877	0.272557	0.707331	0.150377	-0.0275745
HIP1	O00291	Huntingtin-interacting protein 1	18.764	18.6035	18.829	18.7607	18.6211	18.7896	18.7654	18.6157	18.774	5.00099	0.00645066	2.1904	0.149925	0.974054	0.217137	0.663267	-0.0341345	3.36718	0.0166967	1.77737	0.184059
CLIC1	O00299	Chloride intracellular channel protein 1	22.551	22.7052	22.6379	22.6553	22.5907	22.602	22.5218	22.7517	22.5707	0.783685	0.329091	0.482685	-0.106515	0.241589	0.693939	0.158679	-0.0275256	0.697292	0.383996	0.415674	-0.078989
EIF3F	O00303	Eukaryotic translation initiation factor 3 subunit F	21.9652	22.08	22.0326	22.0061	22.0594	22.0034	21.928	22.1638	21.9953	1.58164	0.103641	0.984467	-0.134619	0.806981	0.279396	0.55378	-0.0440063	1.25536	0.168507	0.773382	-0.090613
WWP2	O00308	NEDD4-like E3 ubiquitin-protein ligase WWP2	16.5661	16.5236	16.6952	16.7402	16.573	16.6086	16.5505	16.6742	16.6387	0.141037	0.834094	0.0787848	0.0286471	0.163259	0.783871	0.105756	-0.0285924	0.488073	0.520638	0.283464	0.0572395
CDC7	O00311	Cell division cycle 7-related protein kinase	17.824	17.8629	17.7532	17.7955	17.8223	17.8106	17.8083	17.871	17.7589	1.17132	0.184019	0.735138	-0.0427825	0.80929	0.278435	0.555277	0.0350552	1.51862	0.116684	0.932988	-0.0778376
PDHX	O00330	Pyruvate dehydrogenase protein X component, mitochondrial	19.0043	19.1833	19.2083	19.0396	19.2624	19.0952	19.076	19.1655	19.1384	1.97134	0.060343	1.21937	-0.163793	1.29314	0.134746	0.870485	-0.107325	0.564545	0.465294	0.332272	-0.0564683
QSOX1	O00391	Sulfhydryl oxidase 1	14.3102	14.265	14.0216	14.3047	14.0828	14.2937	14.3042	14.3025	14.1389	0.589282	0.43639	0.360126	0.0895678	0.918342	0.235385	0.628222	0.154966	0.249093	0.732195	0.135373	-0.0653979
DCTN6	O00399	Dynactin subunit 6	16.8723	16.9347	17.0732	16.911	16.8861	17.0349	17.168	16.4977	17.1759	0.562207	0.455772	0.341252	0.210922	0.471661	0.480663	0.31816	-0.11091	1.04608	0.227618	0.642794	0.321832
SLC33A1	O00400	Acetyl-coenzyme A transporter 1	16.0077	16.2784	16.1737	16.2948	16.0424	16.1473	16.0834	16.2223	16.2035	0.178354	0.793522	0.100441	-0.0523777	0.20388	0.738412	0.131702	-0.0461801	0.028528	0.966314	0.0148815	-0.00619761
WASL	O00401	Neural Wiskott-Aldrich syndrome protein	19.1443	18.9348	18.9599	19.0672	18.9975	18.9475	19.0445	19.087	18.8814	0.668745	0.387725	0.411476	0.0788714	1.79704	0.0659818	1.18058	0.155673	0.693708	0.385266	0.414239	-0.0768019
IPO5	O00410	Importin-5	23.7915	23.9204	23.8999	23.9472	23.8139	23.8549	23.7565	23.9623	23.8957	0.385147	0.590782	0.228573	-0.0671628	0.357168	0.580226	0.236403	-0.0517699	0.120912	0.860793	0.0651012	-0.0153929
POLRMT	O00411	DNA-directed RNA polymerase, mitochondrial	19.7964	20.0095	19.9821	19.8548	19.9546	19.9915	19.7977	19.9571	20.003	2.40833	0.0363404	1.43961	-0.157452	3.01986	0.0169384	1.77113	-0.175867	0.414838	0.577874	0.238167	0.0184148
EEF2K	O00418	Eukaryotic elongation factor 2 kinase	17.0088	17.3093	17.1563	17.0565	17.2534	17.1238	17.0296	17.2873	17.0613	3.52987	0.0109439	1.96083	-0.251705	1.24047	0.145019	0.838575	-0.0821559	2.20177	0.0493911	1.30635	-0.169549
SAP18	O00422	Histone deacetylase complex subunit SAP18	20.344	20.4143	20.7007	20.4795	20.4559	20.4747	20.3544	20.5912	20.5057	0.615976	0.419058	0.377726	-0.094518	0.944932	0.226719	0.644512	-0.167766	0.341925	0.640831	0.193256	0.0732479
EML1	O00423	Echinoderm microtubule-associated protein-like 1	16.7228	16.6588	16.7589	16.7865	16.6821	16.6958	16.6866	16.714	16.7406	0.636211	0.407624	0.38974	0.0469913	0.00196758	0.996862	0.00136496	0.000209173	0.883465	0.287243	0.54175	0.0467822
IGF2BP3	O00425	Insulin-like growth factor 2 mRNA-binding protein 3	21.9854	22.0393	21.9862	21.9818	22.0639	21.954	22.0159	21.974	22.0034	0.468862	0.521516	0.282733	-0.0313435	0.295917	0.638164	0.195068	0.0131868	0.661538	0.403227	0.394451	-0.0445302
DNM1L	O00429	Dynamin-1-like protein	21.4545	21.5392	21.5471	21.4965	21.4852	21.5598	21.4245	21.5823	21.5348	1.03343	0.225516	0.646822	-0.0770295	1.79797	0.0658781	1.18126	-0.0887318	0.150444	0.828216	0.0818562	0.0117022
RTCA	O00442	RNA 3-terminal phosphate cyclase	19.9162	20.0191	20.002	19.9776	19.9107	20.0707	19.8841	20.0955	20.0186	0.614592	0.419788	0.37697	-0.0824286	1.4156	0.111532	0.952602	-0.104434	0.141929	0.838953	0.0762626	0.0220051
PIK3C2A	O00443	Phosphatidylinositol 4-phosphate 3-kinase C2 domain-containing subunit alpha	19.806	19.7553	19.723	19.8279	19.6986	19.7912	19.7028	19.9083	19.7116	0.0391743	0.948834	0.0228097	-0.00848262	0.332382	0.604537	0.218577	0.0370007	0.270276	0.709434	0.149088	-0.0454833
IFRD1	O00458	Interferon-related developmental regulator 1	14.7673	15.5464	15.3032	14.7443	15.242	15.5045	14.8955	15.344	15.3795	2.32713	0.0398171	1.39993	-0.57511	2.85537	0.019156	1.7177	-0.593362	0.0590871	0.930556	0.0312577	0.0182524
PIK3R2	O00459	Phosphatidylinositol 3-kinase regulatory subunit beta	16.4506	16.3841	16.1221	16.4017	16.4146	16.1442	16.4356	16.2799	16.1613	0.739368	0.348777	0.457452	0.0697816	4.00539	0.00724148	2.14017	0.286809	2.16363	0.0519288	1.28459	-0.217027
GOLIM4	O00461	Golgi integral membrane protein 4	18.0396	18.2094	18.0911	17.9593	18.2658	18.1032	18.0359	18.1662	18.1028	2.184	0.0467627	1.3301	-0.202199	1.52507	0.094016	1.0268	-0.0874068	1.77194	0.0843794	1.07376	-0.114792
TRAF5	O00463	TNF receptor-associated factor 5	13.2874	13.5567	13.2026	13.4673	13.0398	13.0877	13.2791	13.2008	13.2182	0.18247	0.789739	0.102516	0.0788326	1.11461	0.174796	0.757469	0.175125	0.239976	0.740368	0.130552	-0.0962928
AGRN	O00468	Agrin;Agrin N-terminal 110 kDa subunit;Agrin C-terminal 110 kDa subunit;Agrin C-terminal 90 kDa fragment;Agrin C-terminal 22 kDa fragment	13.4705	13.1263	14.0399	13.84	13.4069	13.6262	13.6505	13.5618	13.6797	0.802922	0.320899	0.493631	0.288669	0.311639	0.623219	0.205359	-0.128277	1.07689	0.217206	0.663129	0.416946
PLOD2	O00469	Procollagen-lysine,2-oxoglutarate 5-dioxygenase 2	20.2215	20.3376	20.2875	20.2533	20.228	20.3528	20.1596	20.3162	20.324	0.886459	0.282478	0.549015	-0.0825106	1.52218	0.0944889	1.02462	-0.109994	0.288494	0.691114	0.16045	0.0274836
MEIS1	O00470	Homeobox protein Meis1	15.2179	14.9678	15.021	15.1282	14.934	15.1457	15.1497	14.8429	15.2021	2.25511	0.0431977	1.36454	0.250432	0.285106	0.647386	0.188837	0.0423762	1.47857	0.123318	0.908974	0.208055
EXOC5	O00471	Exocyst complex component 5	19.2283	19.3826	19.375	19.3992	19.2448	19.3643	19.2455	19.311	19.3801	0.117894	0.860478	0.0652601	-0.0218054	0.685096	0.339715	0.468886	-0.082119	0.684995	0.389498	0.409495	0.0603135
NDUFA4	O00483	Cytochrome c oxidase subunit NDUFA4	20.4455	20.2234	20.9703	20.6859	20.1044	20.7878	20.509	20.512	20.6022	0.883275	0.283517	0.547421	0.266858	0.870492	0.253316	0.596337	-0.239983	1.46103	0.125558	0.901157	0.50684
PSMD14	O00487	26S proteasome non-ATPase regulatory subunit 14	21.6077	21.7023	21.6547	21.7434	21.6348	21.6225	21.6416	21.7418	21.6456	0.217513	0.751922	0.123827	-0.0287075	0.216537	0.722481	0.141174	0.0233123	0.728827	0.365913	0.436623	-0.0520198
ZNF593	O00488	Zinc finger protein 593	16.943	16.7703	16.8086	16.8834	16.8606	16.739	17.1283	16.5275	16.8586	1.00613	0.235181	0.628597	0.265437	1.05466	0.192066	0.716548	0.182841	0.321754	0.65852	0.181431	0.0825958
BIN1	O00499	Myc box-dependent-interacting protein 1	18.4835	18.4729	18.4499	18.4095	18.5755	18.4299	18.5038	18.3049	18.515	0.0599782	0.928726	0.0321123	0.0145226	0.0058743	0.991606	0.00366107	0.000689189	0.0576716	0.931403	0.0308626	0.0138334
KPNA3	O00505	Importin subunit alpha-4	18.9795	19.4569	19.3915	19.1696	19.3702	19.2893	19.0631	19.2817	19.4737	1.79216	0.0765004	1.11634	-0.298861	1.82785	0.0636849	1.19596	-0.3141	0.0726807	0.916521	0.0378576	0.0152384
STK25	O00506	Serine/threonine-protein kinase 25	16.9076	16.7584	16.7778	16.8125	16.6618	16.9503	16.9934	16.5488	16.7965	1.4417	0.125409	0.90167	0.248161	0.345103	0.591356	0.228151	0.0629864	1.06664	0.220546	0.656501	0.185174
BCL9	O00512	B-cell CLL/lymphoma 9 protein	16.1682	16.0135	16.0273	16.0302	16.0123	16.0764	16.1937	16.0003	16.0466	1.12629	0.196943	0.705658	0.122011	0.69665	0.33295	0.477622	0.0806224	1.3031	0.157783	0.801941	0.0413882
KRIT1	O00522	Krev interaction trapped protein 1	14.5175	14.7	14.4344	14.5201	14.5873	14.4976	14.4409	14.6682	14.5368	1.69914	0.0869431	1.06076	-0.159003	0.0271093	0.961801	0.0169149	0.00319544	1.64831	0.0986718	1.00581	-0.162199
PES1	O00541	Pescadillo homolog	21.9713	22.0397	22.0029	22.0371	22.0149	21.9804	21.9686	22.1136	21.9443	0.79247	0.325083	0.488006	-0.0637468	0.229294	0.708305	0.14978	0.016468	1.10279	0.209679	0.678445	-0.0802148
EBAG9	O00559	Receptor-binding cancer antigen expressed on SiSo cells	16.4329	16.7892	16.6827	16.5416	16.7083	16.6292	16.4321	16.7375	16.6569	2.50489	0.0324174	1.48922	-0.276101	2.04448	0.0482322	1.31666	-0.187379	1.45725	0.126271	0.898698	-0.0887229
SDCBP	O00560	Syntenin-1	20.5898	20.6665	20.6772	20.6327	20.6013	20.704	20.6253	20.5791	20.7244	0.00365241	0.995082	0.00214127	0.000328064	1.97001	0.0528103	1.27728	-0.0859248	1.36216	0.144621	0.839767	0.0862528
MPHOSPH10	O00566	U3 small nucleolar ribonucleoprotein protein MPP10	20.631	20.7026	20.544	20.5682	20.7178	20.5966	20.635	20.5725	20.6505	0.446851	0.538449	0.268855	-0.05292	0.141632	0.811008	0.0909749	0.0143611	0.535514	0.486568	0.312856	-0.0672811
NOP56	O00567	Nucleolar protein 56	23.1919	23.3474	23.2327	23.2126	23.3446	23.2	23.1911	23.3512	23.2316	4.47044	0.0071904	2.14325	-0.149178	0.826876	0.27112	0.566839	-0.0229041	3.49925	0.0157546	1.80259	-0.126274
DDX3X	O00571	ATP-dependent RNA helicase DDX3X;ATP-dependent RNA helicase DDX3Y	23.5409	23.4921	23.5022	23.6115	23.5483	23.381	23.5934	23.3842	23.5144	0.952911	0.256438	0.591018	0.107087	1.14805	0.166256	0.779222	0.116105	0.0480666	0.943937	0.0250568	-0.00901731
RNASET2	O00584	Ribonuclease T2	19.2279	19.3569	19.3543	19.2251	19.3599	19.3664	19.2259	19.4365	19.3176	2.42893	0.0350872	1.45485	-0.158156	2.90899	0.0180379	1.74381	-0.119775	0.570999	0.460753	0.336532	-0.0383816
PODXL	O00592	Podocalyxin	16.6326	16.5881	16.6866	16.6088	16.5525	16.7667	16.6092	16.74	16.6253	0.0596322	0.928772	0.032091	-0.00998688	0.846033	0.263141	0.579812	-0.0759761	0.394965	0.593525	0.226561	0.0659892
CYR61	O00622	Protein CYR61	14.8727	14.3758	14.9187	14.6264	14.5741	14.9731	14.7559	14.369	15.0776	1.47719	0.119349	0.92318	0.311983	1.31174	0.130723	0.883648	-0.238183	2.59347	0.0331102	1.48004	0.550166
PIR	O00625	Pirin	19.0527	19.2196	18.9448	19.1309	19.1335	18.9673	19.1084	19.1954	18.9749	1.16204	0.186505	0.72931	-0.0855312	2.24868	0.0368792	1.43322	0.135003	2.90031	0.024116	1.6177	-0.220535
PEX7	O00628	Peroxisomal targeting signal 2 receptor	13.8251	14.0275	14.2168	13.8868	14.1345	14.0515	13.617	14.3101	14.0857	1.51838	0.112574	0.948562	-0.381065	1.62827	0.0826476	1.08277	-0.341699	0.152213	0.826519	0.082747	-0.0393658
KPNA4	O00629	Importin subunit alpha-3	20.0082	20.2409	20.2602	20.0886	20.1812	20.2122	20.0941	20.0752	20.3023	0.849583	0.298621	0.52488	-0.102175	2.16033	0.0415214	1.38173	-0.194601	0.774148	0.34132	0.466839	0.0924263
PPP6C	O00743	Serine/threonine-protein phosphatase 6 catalytic subunit;Serine/threonine-protein phosphatase 6 catalytic subunit, N-terminally processed	20.8769	20.9483	21.0804	21.0313	20.8882	21.0217	20.8782	21.0658	21.0101	0.204193	0.767309	0.11503	-0.0386715	0.910396	0.238583	0.62236	-0.108587	0.547094	0.477947	0.32062	0.0699151
NME4	O00746	Nucleoside diphosphate kinase, mitochondrial	17.381	17.4021	17.4555	17.4352	17.3962	17.3773	17.3739	17.3571	17.4617	0.184212	0.787927	0.103514	0.0115821	0.448669	0.497906	0.302853	-0.034778	0.689462	0.387421	0.411817	0.04636
PIK3C2B	O00750	Phosphatidylinositol 4-phosphate 3-kinase C2 domain-containing subunit beta	12.371	12.356	12.8458	12.601	12.4004	12.6125	12.654	12.2641	12.5746	0.989081	0.241413	0.61724	0.201819	0.486318	0.469362	0.328492	-0.135628	1.64186	0.099466	1.00233	0.337447
MAN2B1	O00754	Lysosomal alpha-mannosidase;Lysosomal alpha-mannosidase A peptide;Lysosomal alpha-mannosidase B peptide;Lysosomal alpha-mannosidase C peptide;Lysosomal alpha-mannosidase D peptide;Lysosomal alpha-mannosidase E peptide	18.0321	17.8946	17.6241	18.1193	17.746	17.7554	18.0254	17.8811	17.7058	1.74895	0.0816913	1.08782	0.218402	2.76188	0.0208075	1.68178	0.363845	1.12177	0.204633	0.689024	-0.145443
UBE2C	O00762	Ubiquitin-conjugating enzyme E2 C	20.0876	20.2613	20.333	20.1929	20.3224	20.1433	20.1556	20.253	20.2683	1.61614	0.0978559	1.00941	-0.133505	0.741328	0.310298	0.508221	-0.102821	0.197278	0.778763	0.108595	-0.0306835
PDXK	O00764	Pyridoxal kinase	19.6045	19.7485	19.6725	19.6754	19.6432	19.7224	19.5946	19.7647	19.7152	0.959832	0.253202	0.596532	-0.0939535	1.23538	0.146003	0.835637	-0.0785217	0.138599	0.842104	0.0746343	-0.0154317
SCD	O00767	Acyl-CoA desaturase	19.2563	19.7062	19.4499	19.2391	19.6484	19.4796	19.2634	19.5882	19.5631	3.46259	0.0117852	1.92866	-0.394652	2.67259	0.0224923	1.64797	-0.244576	1.45125	0.1272	0.895511	-0.150076
PPAP2B	O14495	Lipid phosphate phosphohydrolase 3	15.7688	15.844	15.9478	15.949	15.6383	15.9629	15.7999	15.7853	15.9513	0.431369	0.550939	0.258896	0.0833581	0.963214	0.220972	0.655662	-0.114759	1.49481	0.120617	0.918592	0.198117
ARID1A	O14497	AT-rich interactive domain-containing protein 1A	20.1004	20.1379	20.0632	20.1144	20.1221	20.0822	20.0897	20.0897	20.111	0.40237	0.575737	0.239776	-0.0150814	0.440743	0.504066	0.297512	0.016037	0.717084	0.372555	0.42881	-0.0311184
CDK2AP1	O14519	Cyclin-dependent kinase 2-associated protein 1;Cyclin-dependent kinase 2-associated protein 2	15.5329	15.5823	15.2881	15.3396	15.5866	15.4775	14.6316	16.1891	15.0815	0.843459	0.301642	0.520508	-0.617949	0.142815	0.809838	0.091602	-0.114332	1.02027	0.237164	0.624952	-0.503617
SDHD	O14521	Succinate dehydrogenase [ubiquinone] cytochrome b small subunit, mitochondrial	16.0017	15.9575	15.7711	16.1676	15.7236	15.8507	15.8381	16.1576	15.8043	0.131482	0.846365	0.0724422	0.0562747	0.925078	0.233198	0.632275	0.193794	0.46649	0.536807	0.270182	-0.137519
TMEM194A	O14524	Transmembrane protein 194A	17.4777	17.6605	17.6892	17.5998	17.5818	17.6066	17.4888	17.6763	17.6228	1.13299	0.194501	0.711077	-0.117413	1.18804	0.157703	0.80216	-0.117418	4.2872e-05	0.999901	4.2872e-05	5.08626e-06
TXNDC9	O14530	Thioredoxin domain-containing protein 9	18.7341	18.8212	18.8009	18.7495	18.8187	18.7869	18.7967	18.7697	18.7866	0.789876	0.32629	0.486396	-0.043129	0.741897	0.310041	0.508581	-0.0313822	0.270056	0.709434	0.149088	-0.0117467
DPYSL4	O14531	Dihydropyrimidinase-related protein 4	18.932	18.6674	19.2251	18.8929	18.5843	19.3216	18.9955	18.6278	19.1773	2.91446	0.020868	1.68052	0.31365	2.35688	0.031745	1.49833	-0.301196	3.64182	0.0136341	1.86537	0.614847
TRAFD1	O14545	TRAF-type zinc finger domain-containing protein 1	17.6199	17.6559	17.4211	17.6279	17.6344	17.4574	17.7138	17.5135	17.4133	0.418244	0.560922	0.251097	0.0526034	2.60396	0.0236624	1.62594	0.223263	1.67377	0.0959561	1.01793	-0.170659
COX7A2L	O14548	Cytochrome c oxidase subunit 7A-related protein, mitochondrial	18.1406	17.8915	17.937	18.1423	17.983	17.7924	18.1335	17.9557	17.884	2.69931	0.0259357	1.5861	0.195399	2.49509	0.0265725	1.57557	0.267687	0.651351	0.409186	0.388079	-0.0722885
NDUFAB1	O14561	Acyl carrier protein, mitochondrial	18.979	19.0931	19.1396	18.9833	19.1586	18.9309	19.2707	18.175	19.6352	0.333981	0.636251	0.196372	0.268745	0.274921	0.658816	0.181236	-0.157606	0.488479	0.520385	0.283675	0.426351
UBFD1	O14562	Ubiquitin domain-containing protein UBFD1	20.9496	20.9147	20.8524	20.9112	20.9302	20.8803	20.9031	20.946	20.8737	0.204101	0.767338	0.115013	-0.00896327	1.46445	0.103175	0.986427	0.0525023	2.11785	0.0544905	1.26368	-0.0614656
CYB561D2	O14569	Cytochrome b561 domain-containing protein 2	13.3159	13.9392	13.3084	13.402	13.6656	13.4825	13.559	13.541	13.4237	0.987865	0.241928	0.616313	-0.289655	0.0838401	0.886384	0.0523782	0.020757	1.13838	0.199514	0.700026	-0.310412
CIT	O14578	Citron Rho-interacting kinase	19.0517	19.036	19.0356	19.0704	19.0034	19.0577	19.0375	19.0667	19.0129	0.360389	0.611417	0.213662	0.0178216	0.481144	0.47312	0.325029	0.0177879	0.000490561	0.999433	0.000246232	3.36965e-05
COPE	O14579	Coatomer subunit epsilon	20.3723	20.421	20.5911	20.449	20.3777	20.5458	20.4188	20.4765	20.5102	0.117586	0.860496	0.065251	-0.0117124	1.86229	0.0606184	1.2174	-0.135664	1.5464	0.113163	0.946294	0.123952
RFXANK	O14593	DNA-binding protein RFXANK	13.279	14.0725	13.0411	13.804	13.3138	13.3937	13.4012	13.7121	13.6042	0.308686	0.661716	0.179329	-0.204726	0.258611	0.675776	0.170197	0.148356	0.573827	0.458981	0.338205	-0.353082
CDC42EP2	O14613	Cdc42 effector protein 2	12.4464	12.6449	12.6854	12.1772	12.6667	12.9284	12.6102	12.6472	12.4195	0.891171	0.28078	0.551633	-0.241683	0.618144	0.379565	0.420714	-0.266502	0.0583849	0.930744	0.0311697	0.0248191
AP3D1	O14617	AP-3 complex subunit delta-1	20.8016	21.0021	20.975	20.8518	20.9625	20.9709	20.8713	20.9481	20.9981	2.0991	0.05137	1.28929	-0.12933	2.47091	0.0275558	1.55979	-0.139767	0.223344	0.754665	0.122246	0.0104364
CCS	O14618	Copper chaperone for superoxide dismutase	19.0314	18.9104	18.8657	19.0275	18.9099	18.8542	19.0199	18.9362	18.8512	3.49357	0.011393	1.94336	0.107428	5.15293	0.00555678	2.25518	0.169268	2.50232	0.0357487	1.44674	-0.0618401
ABLIM1	O14639	Actin-binding LIM protein 1	16.4994	16.4384	16.3924	16.5045	16.4837	16.3919	16.5936	16.3189	16.4933	0.960793	0.252725	0.597352	0.118824	1.10197	0.178474	0.748424	0.106654	0.0714942	0.917072	0.0375964	0.0121702
DVL1	O14640	Segment polarity protein dishevelled homolog DVL-1;Putative segment polarity protein dishevelled homolog DVL1P1	13.7481	13.7866	14.0438	13.749	14.0558	13.7528	13.9499	13.918	13.7177	0.435913	0.546921	0.262076	-0.104478	0.063251	0.912316	0.0398547	-0.0224209	0.251648	0.729444	0.137008	-0.0820573
DVL2	O14641	Segment polarity protein dishevelled homolog DVL-2	19.2787	19.2904	19.1947	19.2033	19.2909	19.2276	19.298	19.2539	19.2091	0.230018	0.738563	0.131612	-0.0184072	0.748389	0.307039	0.512806	0.0495497	1.92655	0.0694353	1.15842	-0.0679569
CHD1	O14646	Chromodomain-helicase-DNA-binding protein 1	20.5977	20.525	20.4718	20.6304	20.4887	20.4793	20.5845	20.4659	20.515	2.14287	0.0488382	1.31124	0.110994	2.42588	0.0292082	1.53449	0.115481	0.0723147	0.916561	0.0378388	-0.00448672
CHD2	O14647	Chromodomain-helicase-DNA-binding protein 2	17.5932	17.6604	17.7581	17.5147	17.7265	17.7233	17.6448	17.6674	17.722	1.09327	0.20713	0.683756	-0.100532	1.71597	0.0733901	1.13436	-0.150237	0.967484	0.255753	0.592179	0.0497049
GOSR2	O14653	Golgi SNAP receptor complex member 2	17.6119	17.7657	17.7661	17.6504	17.8256	17.7629	17.7502	17.8104	17.7096	1.34936	0.142222	0.847033	-0.129757	0.76969	0.297131	0.527052	-0.0753841	0.993445	0.246506	0.608173	-0.0543728
IRS4	O14654	Insulin receptor substrate 4	22.8288	22.7852	23.0378	22.7696	22.7897	23.082	22.8497	22.7664	23.0067	0.641695	0.404274	0.393325	0.0355841	2.65174	0.0229166	1.63985	-0.226145	3.46914	0.0159133	1.79824	0.26173
TOR1A	O14656	Torsin-1A	18.5071	18.6203	18.5773	18.5133	18.5779	18.6226	18.4087	18.6758	18.6445	1.5466	0.108429	0.964853	-0.148253	1.61494	0.0838142	1.07668	-0.138411	0.102352	0.881927	0.0545676	-0.00984192
TOR1B	O14657	Torsin-1B	17.8262	17.5648	18.0693	17.8634	17.537	18.0081	17.818	17.6605	17.9595	2.46926	0.0338093	1.47096	0.248466	2.15114	0.0418205	1.37861	-0.176442	3.00923	0.0218945	1.65966	0.424908
STX16	O14662	Syntaxin-16	16.5199	16.8391	16.6908	16.4079	16.8269	16.7558	16.6854	16.4549	16.8874	0.493204	0.503728	0.297804	-0.169264	1.13902	0.168788	0.772659	-0.240296	0.196846	0.77919	0.108357	0.0710322
ADAM10	O14672	Disintegrin and metalloproteinase domain-containing protein 10	17.1631	17.4247	17.3709	17.2108	17.3124	17.431	17.1508	17.406	17.3674	2.20102	0.0459179	1.33802	-0.206138	2.8345	0.0195694	1.70842	-0.214874	0.0760394	0.912793	0.0396279	0.00873566
ABCD4	O14678	ATP-binding cassette sub-family D member 4	13.6834	13.5985	13.6106	13.7187	13.8683	13.6709	13.7097	13.7548	13.5546	0.175752	0.796414	0.0988609	-0.0365658	1.2262	0.1484	0.828567	0.0919189	0.686897	0.388962	0.410093	-0.128485
EI24	O14681	Etoposide-induced protein 2.4 homolog	18.6472	18.5073	18.5707	18.5892	18.4983	18.6092	18.7086	18.3674	18.6273	1.54536	0.108455	0.96475	0.190667	0.527652	0.440835	0.355724	0.045929	1.39946	0.137048	0.863129	0.144739
TP53I11	O14683	Tumor protein p53-inducible protein 11	16.9789	16.749	17.062	16.804	16.6224	17.108	16.9914	16.5372	17.0957	1.54165	0.10902	0.962496	0.288553	1.24005	0.145108	0.838309	-0.163811	2.69898	0.0303927	1.51723	0.452365
KMT2D	O14686	Histone-lysine N-methyltransferase 2D	17.4609	17.4477	17.3423	17.4501	17.4386	17.3854	17.4412	17.4398	17.3521	0.615893	0.419058	0.377726	0.00871849	2.50876	0.0263017	1.58002	0.0908254	2.44867	0.0389415	1.40959	-0.0821069
RGPD8	O14715	RANBP2-like and GRIP domain-containing protein 8;RANBP2-like and GRIP domain-containing protein 5/6	16.0852	16.151	16.1781	16.0825	16.1765	16.2138	16.1523	16.217	16.0994	1.17867	0.182191	0.739473	-0.0748577	0.630907	0.372035	0.429417	-0.0571232	0.172722	0.806049	0.0936383	-0.0177345
TRDMT1	O14717	tRNA (cytosine(38)-C(5))-methyltransferase	14.6928	14.8745	14.9936	14.5248	15.0638	14.9003	14.5195	15.0579	14.8742	2.11951	0.0503936	1.29762	-0.419716	2.15388	0.0418205	1.37861	-0.34365	0.455975	0.545464	0.263234	-0.0760657
APAF1	O14727	Apoptotic protease-activating factor 1	16.997	16.9062	16.9826	16.9921	16.9254	17.0829	16.8553	16.9305	17.0226	0.227895	0.740695	0.130361	0.0273755	0.672986	0.346831	0.459883	-0.0812887	1.64785	0.0987102	1.00564	0.108664
RIOK3	O14730	Serine/threonine-protein kinase RIO3	16.9798	16.9325	16.9316	16.9878	16.8084	17.0404	16.9566	16.8974	17.0089	1.17608	0.182785	0.738059	0.0952969	0.218797	0.720177	0.142561	-0.0188917	1.09423	0.212188	0.673278	0.114189
MAP2K7	O14733	Dual specificity mitogen-activated protein kinase kinase 7	19.1389	19.013	19.1364	19.2033	19.0025	19.118	19.1501	19.0854	19.0599	1.78538	0.0773588	1.11149	0.130435	0.909013	0.239083	0.621451	0.0592906	0.957176	0.259387	0.586051	0.0711441
ACOT8	O14734	Acyl-coenzyme A thioesterase 8	15.5684	15.6661	15.7096	15.5813	15.5588	15.8633	15.5861	15.6318	15.8442	0.555959	0.459474	0.337739	-0.0402536	2.02094	0.0496165	1.30437	-0.227083	1.49631	0.12033	0.919626	0.186829
CDIPT	O14735	CDP-diacylglycerol--inositol 3-phosphatidyltransferase	17.8714	17.9356	18.1949	17.9286	17.8696	18.1631	17.7879	18.0976	18.1266	0.593069	0.433634	0.362877	-0.104956	2.56072	0.0248555	1.60458	-0.298892	1.2889	0.160949	0.793312	0.193936
PDCD5	O14737	Programmed cell death protein 5	21.3116	21.1144	21.0839	21.1325	21.2156	21.1761	21.2436	21.2007	21.105	0.357465	0.613975	0.21185	0.0523637	0.843674	0.264214	0.578045	0.107576	0.58472	0.451985	0.344876	-0.055212
PRMT5	O14744	Protein arginine N-methyltransferase 5;Protein arginine N-methyltransferase 5, N-terminally processed	22.8008	22.9062	22.8444	22.8345	22.8707	22.838	22.8144	22.8343	22.8944	1.10332	0.203938	0.690501	-0.0538673	0.977207	0.216188	0.665169	-0.0423946	0.15704	0.821687	0.0852935	-0.0114727
SLC9A3R1	O14745	Na(+)/H(+) exchange regulatory cofactor NHE-RF1	20.7598	20.6039	20.6792	20.7579	20.6222	20.6504	20.7692	20.6549	20.6142	3.0415	0.0182706	1.73825	0.135278	2.4065	0.0297047	1.52718	0.114351	0.36423	0.621721	0.206404	0.0209268
CHEK1	O14757	Serine/threonine-protein kinase Chk1	19.2527	19.4148	19.373	19.2954	19.3698	19.3417	19.2629	19.4354	19.3234	2.37432	0.0378311	1.42215	-0.136328	1.75694	0.0693796	1.15877	-0.075688	1.17843	0.188309	0.725129	-0.0606403
TNFRSF10B	O14763	Tumor necrosis factor receptor superfamily member 10B	14.4214	13.4591	14.1555	14.257	13.2281	14.4	14.1874	13.3983	14.3708	3.15773	0.016699	1.77731	0.926781	0.0677108	0.907845	0.0419883	-0.0201209	3.10039	0.0194186	1.71178	0.946902
FPGT	O14772	Fucose-1-phosphate guanylyltransferase	17.0736	17.1904	17.4164	17.1535	17.1537	17.4827	17.1339	17.1945	17.432	1.01621	0.231861	0.634772	-0.059166	3.30554	0.0133305	1.87515	-0.323367	3.42175	0.0159368	1.7976	0.264201
TPP1	O14773	Tripeptidyl-peptidase 1	18.1306	18.0083	18.2642	18.0285	18.1069	18.2573	18.1628	18.0447	18.2012	0.470886	0.520159	0.283864	0.0539939	1.38122	0.1176	0.929593	-0.133573	2.23193	0.0478163	1.32042	0.187567
TCERG1	O14776	Transcription elongation regulator 1	22.3962	22.2724	22.3308	22.361	22.2545	22.3578	22.3933	22.2217	22.3559	2.70082	0.0259357	1.5861	0.13396	1.16482	0.161984	0.790528	0.0353216	2.33995	0.0431769	1.36475	0.0986385
NDC80	O14777	Kinetochore protein NDC80 homolog	19.1914	19.3801	19.3131	19.228	19.4303	19.2525	19.3011	19.2547	19.3888	0.870704	0.289112	0.538933	-0.114827	0.697687	0.332311	0.478456	-0.0779616	0.219533	0.757505	0.120615	-0.0368652
NRP1	O14786	Neuropilin-1	13.9072	14.0975	13.9571	13.8904	14.1363	13.8698	13.5582	14.314	13.9798	1.40573	0.13215	0.878934	-0.397343	0.563246	0.416589	0.380292	-0.150278	1.52884	0.115252	0.93835	-0.247065
TNPO2	O14787	Transportin-2	18.758	18.7863	18.8291	18.8284	18.7139	18.881	18.7034	18.8383	18.8832	0.115594	0.863176	0.0639007	-0.0162576	1.18106	0.159111	0.798301	-0.101177	0.991024	0.247377	0.60664	0.0849196
UNC13B	O14795	Protein unc-13 homolog B	17.5872	17.7219	17.5157	17.6245	17.749	17.4537	17.7514	17.4407	17.8533	0.0536203	0.934437	0.02945	0.0171801	0.128334	0.825013	0.0835393	0.0467765	0.0650034	0.924751	0.033975	-0.0295963
POLR3A	O14802	DNA-directed RNA polymerase III subunit RPC1	20.8084	20.9532	20.7857	20.7736	20.949	20.7875	20.7993	20.8065	20.8848	1.03933	0.223341	0.651032	-0.109161	0.303141	0.631357	0.199725	-0.0256062	0.647852	0.41133	0.38581	-0.0835546
CPLX1	O14810	Complexin-1	14.2046	13.7863	14.4326	14.3431	13.633	14.3793	14.478	13.2459	14.5257	1.92967	0.0636212	1.1964	0.786799	0.506714	0.454632	0.34234	-0.103954	2.23134	0.0478163	1.32042	0.890753
PSMA7	O14818	Proteasome subunit alpha type-7	22.8026	23.0217	22.8582	22.8542	22.9497	22.8709	22.8282	22.9091	22.9091	1.66137	0.0916685	1.03778	-0.131833	1.12563	0.171679	0.765284	-0.0511176	1.04452	0.228005	0.642056	-0.0807158
SCAMP3	O14828	Secretory carrier-associated membrane protein 3	20.0589	20.0469	20.0616	19.9952	20.0288	20.1311	20.1567	19.8924	20.0863	0.525433	0.482108	0.316855	0.0808595	0.167972	0.778113	0.108957	-0.0227763	0.916191	0.275147	0.560435	0.103636
PHYH	O14832	Phytanoyl-CoA dioxygenase, peroxisomal	15.3989	15.1767	15.4581	15.2324	15.2133	15.4429	15.1564	15.2762	15.313	0.202113	0.769265	0.113924	0.0405048	0.76833	0.297679	0.526252	-0.142092	1.54541	0.113296	0.945784	0.182597
BACH1	O14867	Transcription regulator protein BACH1	14.3786	14.1741	14.2831	14.351	14.2574	14.1192	14.1506	14.1743	14.3198	0.522092	0.48473	0.3145	0.0914596	0.21657	0.722481	0.141174	0.0527128	0.223814	0.754335	0.122436	0.0387468
BCKDK	O14874	[3-methyl-2-oxobutanoate dehydrogenase [lipoamide]] kinase, mitochondrial	16.6203	16.7477	16.4415	16.4998	16.693	16.5934	16.6366	16.6628	16.482	1.09138	0.207808	0.682338	-0.115601	0.566902	0.41434	0.382643	0.0799179	1.71002	0.0914691	1.03873	-0.195518
MGST3	O14880	Microsomal glutathione S-transferase 3	18.0363	18.443	18.4144	18.3484	18.263	18.2966	18.1421	18.3309	18.4989	0.738517	0.34918	0.456951	-0.170049	0.98092	0.215029	0.667502	-0.227702	0.297099	0.683044	0.165551	0.0576534
GEMIN2	O14893	Gem-associated protein 2	19.5259	19.4685	19.5046	19.4519	19.4818	19.5697	19.5044	19.4349	19.4921	0.550299	0.463449	0.333998	0.0323277	0.359128	0.578527	0.237676	-0.0280565	1.01999	0.237164	0.624952	0.0603841
TAX1BP3	O14907	Tax1-binding protein 3	17.1575	17.2606	17.3123	17.1475	17.2319	17.3854	17.2307	17.1278	17.3691	0.229782	0.738563	0.131612	-0.0282154	2.17344	0.0409121	1.38815	-0.177055	1.49676	0.120311	0.919696	0.148839
GIPC1	O14908	PDZ domain-containing protein GIPC1	20.1054	20.0316	20.1689	20.0535	20.0524	20.1908	20.1646	19.91	20.212	0.937335	0.262741	0.580472	0.109851	1.13046	0.170605	0.768009	-0.0827389	1.85449	0.075096	1.12438	0.19259
LIN7A	O14910	Protein lin-7 homolog A	15.8247	15.9513	15.792	15.8444	15.9561	15.8396	15.9652	15.6931	15.7465	0.0392716	0.94876	0.0228436	0.0112527	0.762932	0.300557	0.522074	0.0854069	0.336711	0.644408	0.190839	-0.0741542
IKBKB	O14920	Inhibitor of nuclear factor kappa-B kinase subunit beta	18.1304	18.1282	18.0758	18.1885	18.055	18.0307	18.1191	18.0676	18.1044	0.934758	0.263799	0.578726	0.0623779	1.17091	0.161015	0.793134	0.0756798	0.160155	0.818394	0.0870376	-0.0133018
TIMM23	O14925	Mitochondrial import inner membrane translocase subunit Tim23;Putative mitochondrial import inner membrane translocase subunit Tim23B	20.204	20.2248	20.3634	20.3466	20.0764	20.337	20.1275	20.3915	20.3199	0.0144179	0.981702	0.0080202	-0.00485166	0.805934	0.279718	0.553279	-0.114044	0.522165	0.496355	0.304207	0.109193
HAT1	O14929	Histone acetyltransferase type B catalytic subunit	21.8591	21.8986	21.9931	21.9823	21.7884	21.9849	21.8539	21.8812	22.0262	0.320891	0.648637	0.187998	0.0423679	1.10523	0.177305	0.751278	-0.102976	1.78687	0.082748	1.08224	0.145344
UBE2L6	O14933	Ubiquitin/ISG15-conjugating enzyme E2 L6	14.4359	14.5803	14.6224	14.5803	14.3511	14.5856	14.4087	14.4971	14.6806	0.00455372	0.994163	0.00254236	-0.00119019	1.21029	0.152269	0.817389	-0.154533	0.992329	0.246888	0.607501	0.153343
CASK	O14936	Peripheral plasma membrane protein CASK	19.5329	19.6649	19.6475	19.5647	19.6121	19.6879	19.5659	19.5966	19.6614	1.39951	0.133263	0.87529	-0.0700614	2.64204	0.0231331	1.63577	-0.111108	0.795499	0.32993	0.481578	0.0410468
PLD2	O14939	Phospholipase D2	15.216	15.4449	15.1787	15.2052	15.4918	15.1284	15.2224	15.4301	15.1231	3.62996	0.0104906	1.9792	-0.24102	1.74315	0.0707501	1.15027	0.0711498	3.58055	0.0143726	1.84246	-0.31217
UQCRQ	O14949	Cytochrome b-c1 complex subunit 8	20.5891	20.4665	20.3255	20.6705	20.4845	20.1768	20.4935	20.6142	20.2672	0.380499	0.594702	0.2257	0.0626138	2.09294	0.0453545	1.34338	0.327868	1.85521	0.0750281	1.12478	-0.265254
HGS	O14964	Hepatocyte growth factor-regulated tyrosine kinase substrate	20.8669	20.9375	21.014	20.876	20.9173	20.9981	20.8895	20.9144	20.984	2.01848	0.0567036	1.24639	-0.0456219	3.43428	0.0117859	1.92864	-0.121241	2.58439	0.0331851	1.47906	0.0756187
AURKA	O14965	Aurora kinase A	17.4213	17.3927	17.3367	17.3892	17.3804	17.4014	17.4092	17.3402	17.3721	0.899191	0.278143	0.555732	0.0354691	0.807269	0.279281	0.553959	0.036485	0.0137095	0.983586	0.00718787	-0.00101598
RAB29	O14966	Ras-related protein Rab-7L1	18.1052	18.0278	18.1403	18.1931	17.9842	18.1373	18.0614	18.1506	18.0554	0.447957	0.537602	0.269539	0.0657228	0.0650417	0.910318	0.0408068	0.00890795	0.425077	0.569515	0.244495	0.0568148
CLGN	O14967	Calmegin	18.3712	18.2643	18.4337	18.4626	18.1477	18.3808	18.4422	18.0526	18.5403	1.80155	0.0754067	1.12259	0.270458	0.183521	0.759391	0.119535	-0.0262299	1.73655	0.0887049	1.05205	0.296688
DSCR3	O14972	Down syndrome critical region protein 3	17.3765	17.6243	17.5919	17.5215	17.535	17.5883	17.3896	17.6174	17.5357	1.39609	0.133809	0.873514	-0.163047	1.34321	0.124745	0.903977	-0.142791	0.234398	0.745681	0.127447	-0.0202554
PPP1R12A	O14974	Protein phosphatase 1 regulatory subunit 12A	20.6293	20.4712	20.4506	20.5988	20.4779	20.4856	20.6254	20.4834	20.4185	3.79274	0.00922082	2.03523	0.140326	2.81356	0.019927	1.70056	0.166295	0.588671	0.449432	0.347336	-0.0259686
SLC27A2	O14975	Very long-chain acyl-CoA synthetase	15.3874	15.2596	15.4045	15.4609	15.3539	15.2618	15.3742	15.388	15.3427	0.717734	0.359909	0.443808	0.0736577	0.65282	0.359082	0.444806	0.071209	0.0143708	0.982593	0.00762646	0.00244872
GAK	O14976	Cyclin-G-associated kinase	19.9105	19.8484	19.7893	19.9058	19.8405	19.8	19.841	19.907	19.7869	0.266179	0.703253	0.152889	0.0204633	1.83258	0.0631851	1.19939	0.0937061	1.5749	0.108529	0.964453	-0.0732428
HNRNPDL	O14979	Heterogeneous nuclear ribonucleoprotein D-like	23.1797	23.1709	22.9997	23.0622	23.2023	23.0608	23.2715	22.7974	23.2536	0.32761	0.642181	0.192343	0.11428	0.273065	0.660289	0.180266	0.0664552	0.115128	0.866983	0.0619895	0.0478249
XPO1	O14980	Exportin-1	23.6244	23.7904	23.7781	23.7462	23.6952	23.7491	23.6023	23.7499	23.8043	0.766921	0.335507	0.474298	-0.0875346	1.18362	0.158661	0.79953	-0.119532	0.429736	0.566244	0.246996	0.0319977
BTAF1	O14981	TATA-binding protein-associated factor 172	19.8171	19.7636	19.818	19.8587	19.7231	19.8029	19.8012	19.8154	19.8073	0.853351	0.297309	0.526793	0.0583172	0.386772	0.553032	0.25725	0.0162627	0.708424	0.377188	0.423442	0.0420545
ARHGEF10	O15013	Rho guanine nucleotide exchange factor 10	15.8641	15.9785	16.0945	16.1618	15.7813	15.9556	16.0761	15.7795	16.1129	0.783584	0.329091	0.482685	0.187571	0.0701655	0.904753	0.04347	-0.0203508	1.18283	0.187331	0.727391	0.207922
ZNF609	O15014	Zinc finger protein 609	15.7541	16.0047	15.9795	15.9979	16.0158	15.9187	16.0516	15.7085	16.0763	0.0636577	0.924773	0.0339648	0.0249001	0.216392	0.722601	0.141102	-0.0569684	0.300841	0.678924	0.168179	0.0818685
ZNF646	O15015	Zinc finger protein 646	14.2222	14.1481	13.6305	14.2448	13.8924	13.8176	13.9637	14.031	14.0507	0.440545	0.542828	0.265338	0.119709	0.96093	0.222011	0.653626	0.310612	0.600771	0.441998	0.35458	-0.190903
SPTBN2	O15020	Spectrin beta chain, non-erythrocytic 2	19.949	20.1151	20.0073	19.9263	20.0923	20.0443	19.9635	20.1172	19.9731	3.56504	0.0108383	1.96504	-0.161937	1.25173	0.142656	0.84571	-0.0619755	1.97687	0.0651699	1.18595	-0.0999616
SEC16A	O15027	Protein transport protein Sec16A	20.7882	20.8206	20.7135	20.7683	20.8413	20.7147	20.7667	20.7739	20.7794	0.826285	0.309594	0.509207	-0.0375824	0.775791	0.294197	0.531362	0.038482	1.21096	0.179369	0.746252	-0.0760644
PLXNB2	O15031	Plexin-B2	16.8379	16.8305	16.9731	16.8532	16.772	16.9939	16.7371	16.9037	16.9792	0.188854	0.78279	0.106355	-0.0260213	2.02361	0.0495997	1.30452	-0.172719	1.7193	0.0906118	1.04282	0.146697
KHNYN	O15037	Protein KHNYN	15.9614	16.3036	16.4514	16.05	16.2794	16.3021	16.1848	16.3746	16.0922	1.63398	0.0953649	1.02061	-0.253778	0.81634	0.275312	0.560175	-0.2165	0.126406	0.855575	0.0677421	-0.0372785
TECPR2	O15040	Tectonin beta-propeller repeat-containing protein 2	16.089	15.688	16.1062	16.127	15.7317	16.2085	15.8498	16.1027	15.8366	0.502585	0.496815	0.303805	0.181158	0.0707694	0.903766	0.043944	-0.0284713	0.537577	0.48486	0.314383	0.209629
U2SURP	O15042	U2 snRNP-associated SURP motif-containing protein	21.992	22.0326	21.9626	22.0137	21.988	21.9814	21.9676	22.0026	22.0212	0.3726	0.602302	0.220185	-0.0166334	0.0421484	0.939068	0.027303	0.00269699	0.373696	0.612652	0.212786	-0.0193303
SETD1A	O15047	Histone-lysine N-methyltransferase SETD1A	18.8536	18.8258	18.9595	18.6971	19.2157	18.7509	18.8664	18.8638	18.8931	0.528608	0.479753	0.318982	-0.162738	0.308448	0.626596	0.203012	-0.0621287	0.294216	0.685824	0.163787	-0.100609
SYNJ2	O15056	Synaptojanin-2	13.7665	13.2227	13.4823	13.8397	13.4912	13.4083	13.8174	13.0411	13.3476	1.8624	0.0693411	1.15901	0.55618	3.04826	0.0166996	1.77729	0.395096	0.518448	0.498433	0.302393	0.161084
KIF3B	O15066	Kinesin-like protein KIF3B;Kinesin-like protein KIF3B, N-terminally processed	18.7788	18.6349	18.5455	18.732	18.5535	18.6475	18.7777	18.5559	18.6153	2.37888	0.037556	1.42532	0.181435	2.04206	0.0483556	1.31555	0.160069	0.205035	0.771548	0.112637	0.0213661
PFAS	O15067	Phosphoribosylformylglycinamidine synthase	22.6235	22.5641	22.6082	22.5791	22.5748	22.6291	22.6279	22.5712	22.6182	1.18624	0.180085	0.744523	0.0401802	0.190567	0.751062	0.124324	-0.00833003	2.68796	0.0304575	1.51631	0.0485102
DCLK1	O15075	Serine/threonine-protein kinase DCLK1	15.6596	15.3004	15.6071	15.7024	15.2828	15.5532	15.5896	15.1955	15.7361	2.97166	0.0197184	1.70513	0.390986	0.104345	0.85888	0.0660676	0.0183849	2.38239	0.0415282	1.38166	0.372601
CEP290	O15078	Centrosomal protein of 290 kDa	17.464	17.542	17.3285	17.2853	17.6345	17.3898	17.5195	17.3159	17.4202	0.250002	0.719122	0.143197	-0.0745099	0.224542	0.713702	0.146483	0.0434551	0.52768	0.492449	0.307639	-0.117965
ANKRD28	O15084	Serine/threonine-protein phosphatase 6 regulatory ankyrin repeat subunit A	18.1594	18.2466	18.2518	18.2104	18.1435	18.294	18.2457	18.0951	18.291	0.352378	0.619017	0.208297	0.0434189	1.21698	0.15057	0.822262	-0.0737883	1.18009	0.18811	0.725588	0.117207
ARHGEF11	O15085	Rho guanine nucleotide exchange factor 11	13.9827	14.2656	13.8605	14.2177	13.8776	14.1412	14.2013	13.9819	14.2082	0.266043	0.703279	0.152872	0.0922038	0.186907	0.755744	0.121625	0.0639442	0.0623544	0.927553	0.0326615	0.0282596
KIAA0391	O15091	Mitochondrial ribonuclease P protein 3	18.5635	18.4545	18.4793	18.5852	18.3953	18.5006	18.5195	18.4161	18.5557	2.17447	0.0471666	1.32637	0.13408	0.671517	0.347527	0.459011	0.0442117	1.45743	0.126271	0.898698	0.0898685
CHUK	O15111	Inhibitor of nuclear factor kappa-B kinase subunit alpha	19.1168	19.3633	19.3585	19.1147	19.3159	19.3868	19.0694	19.4018	19.3238	3.05247	0.0182706	1.73825	-0.260026	3.36753	0.0122916	1.91039	-0.256095	0.0435278	0.948231	0.0230859	-0.00393041
LSM1	O15116	U6 snRNA-associated Sm-like protein LSm1	19.0294	19.184	19.0009	19.0169	19.1952	19.0347	18.9849	19.0886	19.1264	1.7941	0.0763772	1.11704	-0.145537	0.476124	0.477284	0.321223	-0.0436357	0.944019	0.264827	0.577038	-0.101901
NPC1	O15118	Niemann-Pick C1 protein	19.077	19.1333	19.1625	19.084	19.1008	19.1484	19.1087	19.085	19.1712	0.406477	0.571705	0.242828	-0.0164515	2.42518	0.0292082	1.53449	-0.0708338	1.59025	0.106531	0.972524	0.0543823
TBX3	O15119	T-box transcription factor TBX3	15.6359	15.4918	15.2303	15.5126	15.5115	15.3022	15.6412	15.3677	15.2707	1.06574	0.215775	0.665999	0.139579	2.66298	0.0227309	1.64338	0.328881	1.72588	0.0897813	1.04681	-0.189302
AGPAT2	O15120	1-acyl-sn-glycerol-3-phosphate acyltransferase beta	12.882	12.3428	12.9106	13.0496	12.5322	12.5246	12.8063	12.6228	12.7591	1.7106	0.0856931	1.06705	0.413326	0.609737	0.385023	0.414514	0.181227	0.766802	0.344874	0.462339	0.232099
DEGS1	O15121	Sphingolipid delta(4)-desaturase DES1	17.5222	17.4185	17.9603	17.5443	17.5696	17.6968	17.7743	16.8603	18.1622	0.649361	0.39963	0.398342	0.330793	0.973417	0.217205	0.66313	-0.326186	1.2138	0.178468	0.748441	0.656979
SCAMP1	O15126	Secretory carrier-associated membrane protein 1	19.231	18.8573	19.1976	19.1592	18.8271	19.2352	19.2271	18.7544	19.2307	3.28781	0.0143761	1.84236	0.392848	0.231799	0.705199	0.151688	-0.0154502	3.62292	0.0140052	1.85371	0.408298
SCAMP2	O15127	Secretory carrier-associated membrane protein 2	18.9856	18.9054	19.0267	18.9459	18.9155	19.0459	19.0275	18.9059	18.9809	1.50521	0.114347	0.941775	0.0774008	0.444601	0.500588	0.30052	-0.0314891	2.29279	0.0450096	1.34669	0.10889
ARPC1B	O15143	Actin-related protein 2/3 complex subunit 1B	20.2602	20.1303	20.1787	20.3184	19.9998	20.2205	20.3471	19.9471	20.2519	2.03169	0.0557728	1.25358	0.282863	1.29229	0.134746	0.870485	0.0915381	1.51319	0.117488	0.930006	0.191325
ARPC2	O15144	Actin-related protein 2/3 complex subunit 2	21.5327	21.7251	21.7907	21.672	21.6263	21.7273	21.5692	21.6551	21.8241	0.692601	0.374135	0.426971	-0.0775121	1.70198	0.074858	1.12576	-0.189414	1.28545	0.161449	0.791966	0.111902
ARPC3	O15145	Actin-related protein 2/3 complex subunit 3	20.4204	20.54	20.7231	20.5364	20.5939	20.5533	20.5008	20.5405	20.6315	0.869833	0.289343	0.538587	-0.0722853	1.17866	0.159506	0.797223	-0.150073	0.676421	0.394781	0.403644	0.077788
BET1	O15155	BET1 homolog	17.137	17.4615	17.3196	17.0342	17.5648	17.3261	17.1182	17.3164	17.4883	1.95338	0.0616195	1.21028	-0.351096	1.94108	0.0547771	1.2614	-0.2815	0.313478	0.667366	0.175636	-0.0695966
POLR1C	O15160	DNA-directed RNA polymerases I and III subunit RPAC1	21.0295	21.1016	21.0824	21.0789	21.0386	21.1003	21.0274	21.1361	21.0453	0.636871	0.407308	0.390077	-0.0467911	0.587815	0.39941	0.398581	-0.0307344	0.186971	0.790983	0.101833	-0.0160567
PLSCR1	O15162	Phospholipid scramblase 1	15.1536	15.5503	15.4298	15.5587	15.1138	15.388	15.0573	15.6201	15.4025	0.318414	0.651128	0.186333	-0.17153	0.414612	0.526676	0.278457	-0.1502	0.0459078	0.946198	0.024018	-0.0213305
TRIM24	O15164	Transcription intermediary factor 1-alpha	19.2257	19.3558	19.1002	19.2466	19.3304	19.0872	19.1946	19.2799	19.205	1.68096	0.089261	1.04934	-0.0997238	1.06914	0.188306	0.725135	0.0915057	1.93252	0.0688854	1.16187	-0.19123
PGRMC2	O15173	Membrane-associated progesterone receptor component 2	21.1758	21.1632	21.1404	21.1729	21.1355	21.1932	21.1515	21.0816	21.2279	0.727263	0.355668	0.448955	0.0399653	0.314741	0.620249	0.207434	-0.0204417	0.798579	0.32855	0.483398	0.060407
CETN3	O15182	Centrin-3	15.8358	15.9951	15.6553	15.6852	15.9329	15.8468	15.8766	15.7349	15.9115	0.380138	0.594908	0.22555	-0.0883926	0.0182754	0.974453	0.0112391	-0.00530338	0.308435	0.670609	0.173531	-0.0830892
PFDN6	O15212	Prefoldin subunit 6	21.3536	21.1764	21.0969	21.3027	21.1909	21.1462	21.3573	21.0472	21.2383	1.82117	0.0736826	1.13263	0.199696	1.76989	0.0683309	1.16538	0.177396	0.133163	0.848839	0.0711745	0.0223001
WDR46	O15213	WD repeat-containing protein 46	19.8327	20.0009	19.9094	19.8092	19.9832	19.9539	19.9091	19.8337	19.9863	0.660083	0.393136	0.405457	-0.088913	1.24587	0.143892	0.841964	-0.0995191	0.064138	0.925842	0.0334632	0.0106061
GSTA4	O15217	Glutathione S-transferase A4	16.5021	16.6253	16.5819	16.642	16.5598	16.5349	16.6021	16.5832	16.5559	0.0555122	0.932563	0.030322	-0.00736618	0.217632	0.721627	0.141687	0.0244751	0.607447	0.437622	0.358901	-0.0318413
NKRF	O15226	NF-kappa-B-repressing factor	21.8131	21.8802	21.8864	21.7887	21.8877	21.8944	21.828	21.8402	21.8975	1.47553	0.119626	0.922174	-0.0594247	2.64634	0.0231029	1.63633	-0.0828368	0.707701	0.377188	0.423442	0.0234121
GNPAT	O15228	Dihydroxyacetone phosphate acyltransferase	19.2232	19.3636	19.4821	19.3542	19.2882	19.4058	19.227	19.3582	19.4613	0.623889	0.414523	0.382451	-0.0685412	1.6924	0.0757114	1.12084	-0.181591	1.56348	0.110407	0.957003	0.11305
LAMA5	O15230	Laminin subunit alpha-5	12.7937	14.6711	13.5047	12.095	16.1546	12.0199	12.8419	14.9272	12.8565	2.17613	0.0471258	1.32674	-2.67411	0.165752	0.780638	0.10755	-0.216838	1.76078	0.0856153	1.06745	-2.45727
ZNF185	O15231	Zinc finger protein 185	12.387	12.1734	12.6608	12.1588	12.3246	12.7486	12.6432	11.9351	12.6691	0.630232	0.410526	0.386659	0.251988	0.973589	0.217205	0.66313	-0.296495	2.03001	0.0608716	1.21559	0.548484
CASC3	O15234	Protein CASC3	17.4504	17.411	17.2503	17.2613	17.3834	17.3604	17.6297	16.8086	17.6354	0.478366	0.514559	0.288565	0.246057	0.0710392	0.903475	0.0440839	0.031716	0.398896	0.590379	0.228869	0.214341
MRPS12	O15235	28S ribosomal protein S12, mitochondrial	18.1542	18.0724	18.0476	17.9607	18.1027	18.1802	18.2078	17.8697	18.211	0.369785	0.603927	0.219016	0.0926126	0.161227	0.786423	0.104344	-0.0387313	0.672365	0.397137	0.40106	0.131344
LEPROT	O15243	Leptin receptor gene-related protein	10.9817	10.6055	11.6938	11.2608	11.5112	10.351	11.3197	10.7475	11.053	0.317663	0.651883	0.18583	0.232689	0.143034	0.809682	0.0916854	0.154847	0.0561151	0.933525	0.0298739	0.0778421
ACOX3	O15254	Peroxisomal acyl-coenzyme A oxidase 3	15.0146	15.4056	15.1795	15.3756	15.2175	15.1383	15.1191	15.3724	15.2221	0.594424	0.432848	0.363664	-0.162091	0.0312754	0.954955	0.0200169	-0.0102037	1.13701	0.199684	0.699658	-0.151888
RER1	O15258	Protein RER1	19.1146	19.2697	19.1608	19.2822	19.2063	19.0521	19.0789	19.3278	19.148	0.693708	0.373535	0.427669	-0.109391	0.207173	0.734054	0.134272	0.0382671	1.40246	0.136469	0.864965	-0.147658
SURF4	O15260	Surfeit locus protein 4	19.3295	19.5447	19.5482	19.4951	19.4429	19.5245	19.3555	19.6659	19.4696	0.892373	0.280354	0.552294	-0.157789	1.00391	0.207828	0.682296	-0.120732	0.209474	0.767309	0.11503	-0.0370566
SPTLC1	O15269	Serine palmitoyltransferase 1	19.3642	19.4576	19.5654	19.4508	19.5508	19.4498	19.434	19.4983	19.4825	1.0669	0.215506	0.66654	-0.0858765	0.889245	0.246036	0.609001	-0.0828832	0.0228704	0.972095	0.0122915	-0.00299327
SPTLC2	O15270	Serine palmitoyltransferase 2	19.0134	18.9545	19.0953	19.1363	18.9029	19.0122	19.0987	18.7688	19.1817	1.45404	0.123034	0.909976	0.207387	0.0785556	0.893504	0.0489035	-0.013588	1.39474	0.137716	0.861016	0.220975
FANCG	O15287	Fanconi anemia group G protein	13.3882	13.6514	13.537	13.7258	13.6163	13.2746	13.5562	13.379	13.7044	0.0201703	0.975466	0.0107878	0.00785128	0.117994	0.839786	0.0758312	0.0513919	0.103406	0.880829	0.0551084	-0.0435406
OGT	O15294	UDP-N-acetylglucosamine--peptide N-acetylglucosaminyltransferase 110 kDa subunit	21.8075	21.5935	21.6522	21.8546	21.5815	21.602	21.8113	21.674	21.5741	2.50358	0.0324677	1.48855	0.208128	2.84781	0.0193667	1.71295	0.215038	0.0651035	0.924751	0.033975	-0.00690969
PPM1D	O15297	Protein phosphatase 1D	12.6326	13.1765	12.7886	12.652	12.8767	13.0765	13.0948	12.8157	12.72	0.362812	0.60971	0.214876	-0.163151	0.135768	0.817379	0.0875763	-0.0685565	0.238697	0.741211	0.130058	-0.0945943
SIVA1	O15304	Apoptosis regulatory protein Siva	13.0453	13.1175	13.3833	13.1994	13.2893	13.1586	13.0998	13.3918	13.0191	0.757897	0.340067	0.468436	-0.151413	0.247917	0.687772	0.162556	-0.0722043	0.234175	0.745681	0.127447	-0.0792087
PMM2	O15305	Phosphomannomutase 2	20.5787	20.4082	20.3073	20.5529	20.3936	20.3412	20.529	20.3966	20.364	3.29555	0.0142902	1.84496	0.154063	3.23208	0.0142735	1.84547	0.21604	1.65459	0.0979293	1.00909	-0.0619774
RAD51B	O15315	DNA repair protein RAD51 homolog 2	14.905	15.2066	15.2446	15.0308	15.0879	15.1528	14.7791	15.215	15.2764	1.47193	0.120319	0.919666	-0.26484	1.76281	0.0687735	1.16258	-0.319617	0.422538	0.571625	0.242888	0.0547765
POLR3G	O15318	DNA-directed RNA polymerase III subunit RPC7	16.7099	16.6869	16.1374	16.6156	16.7853	16.2118	16.7173	16.3849	16.4547	0.189855	0.781993	0.106797	0.0619361	1.82087	0.0642507	1.19212	0.413019	1.07204	0.218609	0.660332	-0.351082
CTAGE5	O15320	cTAGE family member 5	17.6273	17.7446	17.6817	17.5804	17.75	17.6846	17.7312	17.5875	17.7448	0.275529	0.692997	0.159268	-0.0476799	0.512101	0.450937	0.345884	-0.0573476	0.0585754	0.930556	0.0312576	0.00966771
TM9SF1	O15321	Transmembrane 9 superfamily member 1	17.5874	17.7807	17.8231	17.5138	17.8027	17.8193	17.5662	17.8623	17.7316	2.86152	0.0220834	1.65593	-0.259447	2.50341	0.0263509	1.5792	-0.235527	0.245021	0.73603	0.133105	-0.0239201
MID1	O15344	E3 ubiquitin-protein ligase Midline-1	17.4008	17.3477	17.525	17.434	17.28	17.5499	17.4075	17.3279	17.5058	1.87965	0.0679431	1.16785	0.0956027	2.64077	0.0231331	1.63577	-0.112827	3.02758	0.0211886	1.6739	0.208429
HMGB3	O15347	High mobility group protein B3	23.2172	23.1461	23.0694	23.0673	23.1639	23.1933	23.2472	22.9899	23.1969	0.420097	0.559343	0.252322	0.0772807	0.126381	0.827957	0.081992	0.0240224	0.313923	0.66705	0.175842	0.0532583
PPM1G	O15355	Protein phosphatase 1G	22.5497	22.5625	22.4722	22.5635	22.5858	22.4586	22.5498	22.5593	22.4861	0.71343	0.362535	0.44065	-0.0148735	3.06015	0.0165775	1.78048	0.0820471	2.96095	0.0227744	1.64255	-0.0969206
INPPL1	O15357	Phosphatidylinositol 3,4,5-trisphosphate 5-phosphatase 2	18.7155	18.8369	18.788	18.7365	18.8418	18.8168	18.7555	18.8098	18.7424	2.4485	0.0344509	1.4628	-0.0936852	0.884241	0.247715	0.606048	-0.0465673	0.923321	0.272666	0.564369	-0.0471179
FANCA	O15360	Fanconi anemia group A protein	15.8561	15.7862	15.6818	15.8625	15.8584	15.6199	15.7734	15.8858	15.6979	0.112074	0.867851	0.0615546	-0.012771	1.93396	0.0551999	1.25806	0.164188	2.01531	0.0620198	1.20747	-0.176959
EIF3D	O15371	Eukaryotic translation initiation factor 3 subunit D	22.9629	23.0491	22.9471	22.989	22.9958	22.9806	23.0126	22.9005	23.0616	0.048035	0.939418	0.0271413	0.00641505	0.0790127	0.893051	0.0491236	-0.00826708	0.0951218	0.891136	0.0500558	0.0146821
EIF3H	O15372	Eukaryotic translation initiation factor 3 subunit H	21.0803	21.1299	21.2042	21.1461	21.1207	21.174	21.0823	21.1816	21.2033	0.647445	0.400942	0.396918	-0.0411746	1.72829	0.071945	1.143	-0.0909214	1.093	0.21271	0.672213	0.0497468
HDAC3	O15379	Histone deacetylase 3	16.3138	16.3573	16.457	16.4484	16.3588	16.3916	16.317	16.4693	16.4042	0.241487	0.726624	0.13869	-0.0353921	0.522939	0.444181	0.35244	-0.0578664	0.206096	0.770471	0.113243	0.0224743
NVL	O15381	Nuclear valosin-containing protein-like	21.1452	21.2828	21.2108	21.1784	21.2383	21.2629	21.2081	21.1764	21.2664	0.705232	0.367192	0.435107	-0.0553157	1.27525	0.138172	0.859578	-0.0695025	0.147933	0.830694	0.0805588	0.0141869
BCAT2	O15382	Branched-chain-amino-acid aminotransferase, mitochondrial	19.8512	19.4311	19.4052	19.9306	19.3637	19.3636	19.7504	19.472	19.4274	2.64093	0.0276288	1.55864	0.421786	2.88673	0.0184628	1.7337	0.445314	0.254959	0.725765	0.139204	-0.0235284
BIRC5	O15392	Baculoviral IAP repeat-containing protein 5	17.0652	17.3917	17.2947	17.2319	17.2861	17.3067	17.1761	17.1622	17.3644	0.673151	0.384789	0.414778	-0.122267	1.42738	0.109397	0.960993	-0.164167	0.236417	0.743233	0.128875	0.0419
IPO8	O15397	Importin-8	19.6875	19.9081	19.9295	19.8048	19.7869	19.951	19.7143	19.9396	19.8865	1.14648	0.190609	0.719856	-0.142699	2.01284	0.0499985	1.30104	-0.186822	0.366963	0.618948	0.208346	0.0441233
STX7	O15400	Syntaxin-7	18.7083	18.6309	18.6855	18.6192	18.7303	18.6882	18.7355	18.6272	18.6737	0.195992	0.776441	0.109892	0.0248502	0.0502137	0.928371	0.0322784	0.00517591	0.22594	0.752584	0.123445	0.0196743
SLC31A1	O15431	High affinity copper uptake protein 1	17.5265	17.8056	17.6678	17.5931	17.662	17.767	17.6477	17.6888	17.7042	1.08253	0.210666	0.676405	-0.129712	1.27709	0.137754	0.860895	-0.123875	0.0375154	0.956147	0.0194755	-0.00583712
ABCC4	O15439	Multidrug resistance-associated protein 4	18.5762	18.673	18.7325	18.669	18.6052	18.7128	18.6312	18.6058	18.7421	0.0241404	0.970774	0.0128819	-0.00253169	1.66829	0.0782829	1.10633	-0.103654	1.86256	0.074444	1.12817	0.101122
ABCC5	O15440	Multidrug resistance-associated protein 5	13.3633	13.2284	14	13.8184	13.2494	13.7365	13.5685	13.6552	13.6148	0.464959	0.524525	0.280234	0.205736	0.503898	0.456651	0.340415	-0.200376	1.06332	0.221496	0.654634	0.406111
CD3EAP	O15446	DNA-directed RNA polymerase I subunit RPA34	19.9356	19.9281	19.8022	19.8161	19.8926	19.9382	19.9364	19.85	19.8505	0.0428195	0.944074	0.0249941	0.00576528	0.223966	0.714529	0.14598	0.0323442	0.227266	0.751347	0.12416	-0.0265789
P4HA2	O15460	Prolyl 4-hydroxylase subunit alpha-2	19.6976	19.6808	19.8434	19.7239	19.6198	19.8475	19.7206	19.6409	19.8266	1.56158	0.106476	0.97275	0.0668653	3.55116	0.0109239	1.96162	-0.125108	3.26854	0.0179141	1.74681	0.191973
MAGEB2	O15479	Melanoma-associated antigen B2	17.3949	17.3867	17.2802	17.3752	17.2516	17.4657	17.3321	17.3443	17.3949	0.381055	0.594426	0.225902	0.0398871	0.0793459	0.89277	0.0492605	-0.0128574	0.322108	0.658475	0.181461	0.0527445
YKT6	O15498	Synaptobrevin homolog YKT6	19.9358	20.2452	20.2933	20.1318	20.1303	20.2337	20.0013	20.2137	20.2995	1.2156	0.17206	0.764319	-0.173436	1.83476	0.0629445	1.20104	-0.252531	0.919561	0.273806	0.562558	0.0790952
NUPL2	O15504	Nucleoporin-like protein 2	18.2583	18.1858	18.0905	18.1672	18.2248	18.2024	18.2192	18.1702	18.1331	0.276368	0.69243	0.159624	0.0213127	0.804188	0.280633	0.551861	0.0729535	0.639773	0.416483	0.380402	-0.0516408
ARPC5	O15511	Actin-related protein 2/3 complex subunit 5	19.7101	19.8804	19.837	19.7825	19.7786	19.8435	19.6911	19.8389	19.8683	1.21235	0.172939	0.762106	-0.104766	1.84008	0.0624773	1.20428	-0.121702	0.21161	0.765015	0.11633	0.0169366
POLR2D	O15514	DNA-directed RNA polymerase II subunit RPB4	19.3213	19.2564	19.1711	19.2356	19.2627	19.268	19.3073	19.2051	19.2426	0.65498	0.39597	0.402338	0.0466194	0.706163	0.32772	0.484498	0.0608292	0.155125	0.823349	0.0844158	-0.0142097
MAFG	O15525	Transcription factor MafG	15.3945	15.1973	15.497	15.2064	15.2272	15.6156	15.272	15.2947	15.5275	0.340652	0.630401	0.200383	0.0512349	1.75527	0.0695307	1.15782	-0.255705	2.59064	0.0331851	1.47906	0.306939
PDPK1	O15530	3-phosphoinositide-dependent protein kinase 1;Putative 3-phosphoinositide-dependent protein kinase 2	18.6208	18.6409	18.636	18.6311	18.6738	18.6614	18.6613	18.6968	18.6283	0.741874	0.347612	0.458905	-0.0327663	0.0939091	0.873198	0.0588874	-0.00413513	0.682765	0.391016	0.407805	-0.0286312
TAPBP	O15533	Tapasin	17.0047	16.6282	16.7736	17.0812	16.5816	16.7283	17.0321	16.7118	16.6457	3.07866	0.0178725	1.74781	0.398823	2.75374	0.0209327	1.67918	0.323454	0.636369	0.418682	0.378116	0.0753689
RNF113A	O15541	RING finger protein 113A	19.1326	19.0017	19.0591	19.0332	19.0205	19.1216	19.1204	18.9824	19.0428	1.32469	0.147308	0.831775	0.09386	0.204779	0.73706	0.132497	0.0209115	1.29488	0.159574	0.797039	0.0729485
KDM6A	O15550	Lysine-specific demethylase 6A	15.7967	15.7938	15.8595	15.8326	15.8504	15.7862	15.7898	15.7446	15.7874	0.109064	0.871136	0.059914	0.0100505	0.0586824	0.917977	0.0371684	-0.00468032	0.139778	0.840642	0.0753887	0.0147308
DHX15	O43143	Pre-mRNA-splicing factor ATP-dependent RNA helicase DHX15	23.7126	23.767	23.7802	23.7388	23.7239	23.8151	23.7191	23.7377	23.809	0.577078	0.445324	0.351323	-0.0193698	2.36866	0.031438	1.50255	-0.0779578	1.61026	0.104091	0.982587	0.058588
RNMT	O43148	mRNA cap guanine-N7 methyltransferase	20.5241	20.5077	20.4395	20.4921	20.5125	20.4805	20.4608	20.4782	20.5209	0.122655	0.855254	0.0679046	-0.00712013	0.150976	0.7993	0.0972899	0.0120557	0.301791	0.677956	0.168799	-0.0191758
ZZEF1	O43149	Zinc finger ZZ-type and EF-hand domain-containing protein 1	18.2104	18.0786	18.1242	18.2537	18.0001	18.1422	18.2707	18.0133	18.1248	2.6814	0.0262718	1.58051	0.214258	2.42642	0.0292082	1.53449	0.114468	1.7904	0.0823576	1.0843	0.0997899
ASAP2	O43150	Arf-GAP with SH3 domain, ANK repeat and PH domain-containing protein 2	12.9871	12.4981	12.6158	12.4476	12.7225	12.9037	12.6616	12.6031	12.7886	0.207131	0.763453	0.117218	0.0908861	0.147752	0.80334	0.0951008	-0.0705811	0.695144	0.384611	0.414978	0.161467
TTI1	O43156	TELO2-interacting protein 1 homolog	17.6398	17.5436	17.587	17.5884	17.6467	17.5687	17.5786	17.6213	17.5603	0.0146034	0.981563	0.00808183	-0.00160408	0.667224	0.349856	0.456111	0.0302575	0.425036	0.569515	0.244495	-0.0318616
RRP8	O43159	Ribosomal RNA-processing protein 8	19.3456	19.289	19.3094	19.3658	19.2472	19.3394	19.3102	19.4007	19.2281	0.227331	0.740801	0.130298	0.0282415	0.580695	0.405091	0.392448	0.0482089	0.129546	0.852619	0.0692449	-0.0199674
PJA2	O43164	E3 ubiquitin-protein ligase Praja-2	16.9617	16.9855	16.8353	16.8289	17.0584	16.8991	16.9993	16.8098	16.9704	0.0834487	0.900662	0.045438	-0.021239	0.16495	0.781577	0.107028	0.0283712	0.233394	0.74614	0.12718	-0.0496101
SIPA1L1	O43166	Signal-induced proliferation-associated 1-like protein 1	13.9823	14.0388	13.8107	13.7039	14.0921	14.0004	13.8868	13.8171	14.0446	0.46015	0.528546	0.276917	-0.125015	0.361502	0.576983	0.238837	-0.0942183	0.0999046	0.884688	0.0532098	-0.030797
CYB5B	O43169	Cytochrome b5 type B	17.8785	18.1575	18.0794	18.1303	18.0198	17.9363	18.1888	17.5263	18.4156	0.314772	0.654739	0.183932	0.164682	0.172405	0.772371	0.112174	-0.0778961	0.435707	0.56216	0.25014	0.242578
PRPF4	O43172	U4/U6 small nuclear ribonucleoprotein Prp4	21.3966	21.474	21.4215	21.3495	21.5087	21.4089	21.3843	21.4086	21.4639	1.2538	0.162668	0.788698	-0.0869516	1.17746	0.15957	0.797049	-0.0546347	0.406166	0.584224	0.233421	-0.0323168
PHGDH	O43175	D-3-phosphoglycerate dehydrogenase	24.44	24.7821	24.8132	24.4112	24.8179	24.7644	24.4793	24.7757	24.7631	3.90494	0.00847828	2.07169	-0.34838	3.70753	0.00917725	2.03729	-0.336718	0.215088	0.762756	0.117614	-0.0116622
NDUFS4	O43181	NADH dehydrogenase [ubiquinone] iron-sulfur protein 4, mitochondrial	18.7259	18.6688	18.5109	18.7198	18.7133	18.4205	18.813	18.48	18.624	0.786204	0.327855	0.484318	0.132205	1.62164	0.0834112	1.07878	0.23443	0.479327	0.526839	0.278322	-0.102224
PHF1	O43189	PHD finger protein 1	11.3756	11.8601	11.2798	11.2542	11.5899	11.7079	11.7514	11.4177	11.3243	0.339556	0.63138	0.199709	-0.162155	0.0387604	0.943676	0.0251769	0.023077	0.422044	0.571625	0.242888	-0.185232
DYNC1LI2	O43237	Cytoplasmic dynein 1 light intermediate chain 2	20.3328	20.2973	20.329	20.3505	20.3095	20.3326	20.3186	20.3105	20.3137	1.3015	0.152003	0.818147	0.0281881	0.336497	0.600232	0.221681	0.00886726	1.26549	0.16585	0.780284	0.0193208
PSMD3	O43242	26S proteasome non-ATPase regulatory subunit 3	23.3014	23.4021	23.3616	23.3848	23.3674	23.2981	23.3581	23.337	23.3818	0.26771	0.701635	0.153889	-0.020724	0.00871527	0.987771	0.00534364	0.000932693	0.27666	0.70271	0.153224	-0.0216567
HOXC11	O43248	Homeobox protein Hox-C11	13.5951	13.1912	13.4003	13.4452	13.5225	13.1561	13.5252	13.1952	13.3914	0.862774	0.292761	0.533487	0.218906	1.06395	0.189684	0.72197	0.205902	0.0322999	0.962146	0.0167589	0.0130037
RBFOX2	O43251	RNA binding protein fox-1 homolog 2;RNA binding protein fox-1 homolog 1	18.5633	18.5159	18.4762	18.4962	18.4595	18.5948	18.5509	18.3687	18.6995	0.868148	0.290118	0.537425	0.0887826	0.323544	0.612767	0.212704	-0.05336	0.852568	0.300805	0.521714	0.142143
PAPSS1	O43252	Bifunctional 3-phosphoadenosine 5-phosphosulfate synthase 1;Sulfate adenylyltransferase;Adenylyl-sulfate kinase	21.4006	21.467	21.5958	21.3965	21.45	21.6124	21.4084	21.507	21.5571	1.87042	0.0686159	1.16358	-0.0728289	3.43056	0.011834	1.92687	-0.186593	2.07293	0.0577583	1.23839	0.113764
ZNHIT1	O43257	Zinc finger HIT domain-containing protein 1	16.0083	15.5734	15.4913	15.7806	15.7255	15.6523	15.9461	15.5101	15.6032	1.52717	0.11125	0.953699	0.308694	1.78111	0.0673653	1.17156	0.329399	0.0926381	0.893643	0.048836	-0.0207052
ZW10	O43264	Centromere/kinetochore protein zw10 homolog	20.5228	20.6422	20.6719	20.6342	20.553	20.6681	20.5015	20.685	20.6573	0.582435	0.441494	0.355075	-0.0739403	1.28077	0.137131	0.862865	-0.112969	0.425876	0.569385	0.244594	0.0390288
B4GALT5	O43286	Beta-1,4-galactosyltransferase 5	12.9764	12.7668	12.9757	12.7266	13.1949	12.8075	12.642	13.2607	12.8151	0.725496	0.356542	0.447889	-0.292475	0.299866	0.635003	0.197224	-0.0844301	0.562175	0.467056	0.330631	-0.208045
SART1	O43290	U4/U6.U5 tri-snRNP-associated protein 1	21.8531	21.8617	21.7504	21.7667	21.8856	21.809	21.87	21.7805	21.7918	0.10106	0.88151	0.0547728	-0.0126966	0.563021	0.416716	0.38016	0.046189	0.74525	0.356957	0.447384	-0.0588856
GPAA1	O43292	Glycosylphosphatidylinositol anchor attachment 1 protein	18.3827	18.1504	18.3877	18.4368	18.1837	18.2741	18.3409	18.1409	18.4289	2.76246	0.0244487	1.61174	0.228481	0.161622	0.785949	0.104606	0.0232194	1.88731	0.0718545	1.14355	0.205261
DAPK3	O43293	Death-associated protein kinase 3	12.8373	12.468	12.5264	12.1083	12.7758	12.8162	12.8296	12.4353	12.468	0.0411714	0.945985	0.024116	0.0320476	0.0147385	0.979287	0.00909006	-0.0117769	0.103186	0.880829	0.0551084	0.0438245
TGFB1I1	O43294	Transforming growth factor beta-1-induced transcript 1 protein	11.572	11.6229	10.4023	11.4435	10.7878	11.168	11.1984	11.7803	10.5166	0.00765768	0.991022	0.00391665	0.0076189	1.26747	0.139799	0.854495	0.70899	0.835229	0.309786	0.508938	-0.701371
ZBTB43	O43298	Zinc finger and BTB domain-containing protein 43	14.1157	14.2543	14.296	14.0733	14.3289	14.3346	14.1886	14.2584	14.2523	1.69122	0.0879721	1.05566	-0.154639	1.8231	0.0640378	1.19356	-0.168419	0.151515	0.827131	0.0824258	0.01378
AP5Z1	O43299	AP-5 complex subunit zeta-1	15.0497	15.0046	14.7127	14.9748	14.7756	15.0158	14.9375	15.1021	14.7819	0.0928202	0.889963	0.0506279	0.0265999	0.704783	0.328686	0.483219	0.15053	0.392325	0.595787	0.224909	-0.12393
HSPA12A	O43301	Heat shock 70 kDa protein 12A	17.5549	17.5812	17.6941	17.6903	17.4974	17.6822	17.5338	17.6114	17.7364	0.189991	0.781948	0.106822	0.0296446	1.00958	0.206127	0.685865	-0.111261	1.68997	0.0936895	1.02831	0.140906
CCP110	O43303	Centriolar coiled-coil protein of 110 kDa	15.4707	15.3848	15.4741	15.4987	15.3623	15.5156	15.4371	15.3865	15.375	2.0246	0.0563322	1.24924	0.0909119	0.110938	0.848415	0.0713915	0.0138896	0.843033	0.306008	0.514267	0.0770222
ADCY6	O43306	Adenylate cyclase type 6	12.8266	12.7227	13.0398	12.6507	13.0508	12.8822	12.5552	13.1589	12.7579	0.913344	0.272865	0.564053	-0.299972	0.882475	0.248194	0.605209	-0.21579	0.211376	0.765292	0.116173	-0.0841818
CTIF	O43310	CBP80/20-dependent translation initiation factor	15.1751	16.8737	15.3179	15.7782	15.7338	15.6231	15.0905	16.9621	15.1441	1.22445	0.169261	0.771442	-1.17527	0.0177675	0.974592	0.0111772	-0.0137885	1.29742	0.159074	0.798401	-1.16148
PPIP5K2	O43314	Inositol hexakisphosphate and diphosphoinositol-pentakisphosphate kinase 2	19.3463	19.3455	19.2942	19.2838	19.3507	19.3588	19.3148	19.3398	19.3179	0.762156	0.337765	0.471385	-0.0303599	0.121154	0.83503	0.078298	-0.00867017	0.494488	0.515675	0.287624	-0.0216897
MAP3K7	O43318	Mitogen-activated protein kinase kinase kinase 7	18.2911	18.1659	18.1857	18.2747	18.1543	18.2629	18.2655	18.0887	18.2855	2.30008	0.0411996	1.38511	0.140793	0.447646	0.498261	0.302543	0.0323861	1.31515	0.154862	0.810056	0.108407
EEF1E1	O43324	Eukaryotic translation elongation factor 1 epsilon-1	20.0906	20.1186	20.4805	20.2381	20.0255	20.3456	20.0408	20.173	20.4115	0.0843984	0.899523	0.0459877	0.0174459	1.82214	0.0641407	1.19287	-0.289376	2.21135	0.0489545	1.31021	0.306822
MSI1	O43347	RNA-binding protein Musashi homolog 1	18.8008	19.1015	18.8183	18.7614	19.1162	18.8371	18.8102	18.862	19.0622	1.31867	0.148518	0.82822	-0.235789	0.652523	0.359109	0.444773	-0.115089	0.458107	0.543742	0.264607	-0.1207
RIPK2	O43353	Receptor-interacting serine/threonine-protein kinase 2	17.7629	17.676	17.8044	17.6719	17.762	17.8579	17.7147	17.6836	17.8153	0.0865744	0.896542	0.0474292	0.00928434	1.61746	0.0838142	1.07668	-0.109403	1.68501	0.0944604	1.02475	0.118687
WDR62	O43379	WD repeat-containing protein 62	15.7369	15.7733	16.1208	15.9148	15.8512	15.8936	15.7149	16.0225	15.8671	0.408676	0.569441	0.244551	-0.0934655	0.771817	0.296025	0.528672	-0.171611	0.289546	0.69036	0.160924	0.0781453
HNRNPR	O43390	Heterogeneous nuclear ribonucleoprotein R	23.2175	23.3693	23.2947	23.198	23.4214	23.2335	23.3213	23.0554	23.464	0.109331	0.871104	0.0599301	-0.0364412	0.467394	0.483905	0.31524	-0.0851491	0.134514	0.846751	0.0722441	0.048708
PRPF3	O43395	U4/U6 small nuclear ribonucleoprotein Prp3	22.2428	22.1266	22.0807	22.1454	22.1476	22.171	22.2588	22.0315	22.1635	1.06229	0.216293	0.664958	0.113759	0.778448	0.292909	0.533268	0.0772406	0.326584	0.654205	0.184286	0.0365187
TXNL1	O43396	Thioredoxin-like protein 1	21.0267	21.1033	21.0086	21.0304	21.1099	21.0361	21.0627	21.0532	21.0549	1.08172	0.210809	0.67611	-0.0488974	0.141391	0.811194	0.0908754	0.00673358	1.1682	0.190812	0.719394	-0.055631
TPD52L2	O43399	Tumor protein D54	20.4329	20.1534	20.2929	20.2727	20.1705	20.3873	20.3758	20.1352	20.3436	1.90595	0.0656906	1.1825	0.207406	0.129594	0.823909	0.0841209	0.0191377	2.53053	0.0348232	1.45813	0.188268
EMC8	O43402	ER membrane protein complex subunit 8	19.7072	19.7215	19.8425	19.7416	19.6482	19.8451	19.7887	19.4962	19.9288	0.813845	0.315369	0.50118	0.123827	1.57344	0.0884538	1.05328	-0.126338	1.591	0.106408	0.973024	0.250165
COCH	O43405	Cochlin	13.5754	13.5218	13.535	13.9418	13.0736	13.59	13.8397	13.3794	13.3466	1.26117	0.161401	0.792094	0.460732	1.0528	0.192564	0.715424	0.295132	0.474507	0.530822	0.275051	0.165599
ERI3	O43414	ERI1 exoribonuclease 3	18.9677	19.4976	19.4939	19.198	19.3445	19.3806	18.9381	19.6056	19.4228	1.79577	0.0761851	1.11813	-0.447997	1.96326	0.0532678	1.27354	-0.397867	0.238934	0.741211	0.130058	-0.0501302
PRKRIR	O43422	52 kDa repressor of the inhibitor of the protein kinase	15.658	15.963	16.0718	16.0837	15.7276	15.9255	15.7528	16.0504	15.9272	0.196003	0.776441	0.109892	-0.0821616	0.447189	0.49859	0.302256	-0.143327	0.221079	0.757299	0.120733	0.0611658
SYNJ1	O43426	Synaptojanin-1	17.2937	17.3137	17.2368	17.3291	17.2582	17.2976	17.2711	17.3726	17.3086	0.171984	0.800568	0.0966016	-0.0168654	0.238097	0.697759	0.156295	0.0169245	0.352138	0.632495	0.198943	-0.03379
FIBP	O43427	Acidic fibroblast growth factor intracellular-binding protein	18.0307	18.3005	18.2035	18.0411	18.2474	18.2158	18.0239	18.29	18.2012	3.88713	0.00847828	2.07169	-0.247368	4.8778	0.00569057	2.24484	-0.174954	1.89637	0.0712596	1.14716	-0.0724144
EIF4G3	O43432	Eukaryotic translation initiation factor 4 gamma 3	18.915	18.9916	19.048	18.9653	18.9651	19.0494	18.8991	19.0006	19.0551	1.23183	0.167412	0.776212	-0.0593046	2.46351	0.0278175	1.55568	-0.124395	2.40631	0.0405446	1.39207	0.0650908
PPIH	O43447	Peptidyl-prolyl cis-trans isomerase H	21.578	21.6924	21.8149	21.7432	21.6309	21.7179	21.636	21.6776	21.803	0.100981	0.881532	0.0547621	-0.0145702	1.03575	0.197876	0.703608	-0.12619	1.45161	0.127167	0.895626	0.11162
SUV39H1	O43463	Histone-lysine N-methyltransferase SUV39H1	13.9934	13.7829	13.6358	13.9837	13.7685	13.6914	13.8474	14.0543	13.6836	0.281814	0.687473	0.162745	0.0729287	2.24432	0.0371408	1.43015	0.271238	0.983036	0.250038	0.601993	-0.198309
HTRA2	O43464	Serine protease HTRA2, mitochondrial	18.2381	18.0814	18.084	18.225	17.9295	18.245	18.2322	17.9932	18.1887	2.1895	0.0465116	1.33244	0.230389	0.554127	0.421814	0.374879	0.0591946	1.24541	0.170685	0.767805	0.171194
OIP5	O43482	Protein Mis18-beta	16.6709	16.4646	16.4848	16.64	16.5719	16.422	16.485	16.6814	16.4721	0.110849	0.869225	0.0608679	0.026029	1.07762	0.185472	0.731723	0.139011	0.797376	0.329136	0.482625	-0.112982
AKR7A2	O43488	Aflatoxin B1 aldehyde reductase member 2	19.5822	19.9126	20.0531	19.6252	19.8703	20.0105	19.6207	19.9717	19.9442	3.16839	0.0165278	1.78179	-0.308831	3.47141	0.0114745	1.94027	-0.393224	0.911177	0.276916	0.557652	0.0843932
EPB41L2	O43491	Band 4.1-like protein 2	22.4939	22.7237	22.5676	22.4775	22.7295	22.5754	22.519	22.5892	22.6712	1.74954	0.0816913	1.08782	-0.183989	1.41787	0.111179	0.953977	-0.107913	0.601176	0.441998	0.35458	-0.0760759
TGOLN2	O43493	Trans-Golgi network integral membrane protein 2	15.0797	15.7385	15.4777	15.0168	15.6817	15.4675	15.0976	15.6225	15.5034	3.92172	0.00847828	2.07169	-0.616172	4.01184	0.00720909	2.14212	-0.418161	2.31058	0.0442019	1.35456	-0.198011
RAD51C	O43502	DNA repair protein RAD51 homolog 3	16.1883	16.2717	16.0496	16.0202	16.1898	16.2862	16.099	16.0783	16.3182	0.449095	0.536992	0.270032	-0.0774002	0.519539	0.446258	0.350414	-0.1155	0.138697	0.842052	0.074661	0.0380999
LAMTOR5	O43504	Ragulator complex protein LAMTOR5	18.2727	18.5114	18.2461	18.0707	18.6549	18.2632	18.534	18.0307	18.4459	0.174354	0.798446	0.0977542	-0.106541	0.0606053	0.915845	0.0381779	-0.025966	0.150774	0.827998	0.0819706	-0.0805753
B4GAT1	O43505	Beta-1,4-glucuronyltransferase 1	18.0371	17.894	18.2037	18.0512	17.8249	18.2514	17.9884	17.9176	18.1992	1.91587	0.064669	1.1893	0.146725	2.7939	0.0202458	1.69367	-0.192558	3.32527	0.0172135	1.76413	0.339283
MED7	O43513	Mediator of RNA polymerase II transcription subunit 7	13.8361	14.2051	13.9015	14.0606	14.0687	13.9402	14.0974	13.7973	14.0983	0.0614467	0.92712	0.032864	-0.0256764	0.0617929	0.91432	0.0389016	0.0180556	0.11878	0.863005	0.0639867	-0.043732
WIPF1	O43516	WAS/WASL-interacting protein family member 1	15.9603	15.6154	15.6235	15.5356	15.8569	15.7712	15.9426	15.5681	15.7265	0.331226	0.639266	0.194318	0.132702	0.294652	0.639031	0.194478	0.105764	0.0968522	0.888563	0.0513118	0.0269378
FOXO3	O43524	Forkhead box protein O3	16.6929	16.3702	16.4203	16.6603	16.2889	16.5621	16.7517	16.1343	16.6084	2.38245	0.0374597	1.42644	0.437178	1.28357	0.136661	0.864356	0.171315	1.38764	0.139049	0.856831	0.265863
XRCC3	O43542	DNA repair protein XRCC3	16.185	16.0756	16.2106	16.0971	16.1499	16.2468	16.1235	16.1428	16.2236	0.129677	0.847979	0.0716149	0.0124283	1.50975	0.0963674	1.01607	-0.0918007	1.7995	0.0811847	1.09053	0.104229
RNF13	O43567	E3 ubiquitin-protein ligase RNF13	16.377	16.296	16.1567	16.3746	16.345	16.0705	16.4407	16.2468	16.2213	1.33121	0.145686	0.836582	0.101466	2.15197	0.0418205	1.37861	0.247931	1.31713	0.154767	0.81032	-0.146465
AKAP10	O43572	A-kinase anchor protein 10, mitochondrial	14.1222	14.3989	14.2661	14.4522	14.1072	14.2817	14.4029	14.3026	14.2021	0.157211	0.816809	0.0878797	0.0561838	0.290183	0.642795	0.191927	0.0758025	0.0774488	0.911094	0.0404367	-0.0196187
DENR	O43583	Density-regulated protein	20.956	20.9125	20.9594	20.8643	20.9295	21.0015	20.9464	20.926	20.9638	0.00512393	0.993299	0.00292001	-0.000462214	0.756498	0.303515	0.517819	-0.0526841	1.65991	0.0974066	1.01141	0.0522219
XPOT	O43592	Exportin-T	20.8251	21.1064	21.0938	21.0295	20.9562	21.0127	20.7892	21.1961	21.0313	0.935271	0.26371	0.578874	-0.204974	0.979736	0.215334	0.666887	-0.164665	0.210714	0.765655	0.115967	-0.0403093
DNPH1	O43598	2-deoxynucleoside 5-phosphate N-hydrolase 1	19.6892	19.6874	19.8316	19.6465	19.7485	19.808	19.7815	19.4473	19.9364	0.319148	0.650276	0.186902	0.078029	1.27859	0.137516	0.861648	-0.152902	1.08527	0.21478	0.668006	0.230931
TIMM44	O43615	Mitochondrial import inner membrane translocase subunit TIM44	22.1326	22.1847	22.2292	22.1289	22.2008	22.2032	22.125	22.1985	22.2108	3.55221	0.0108383	1.96504	-0.0658277	3.35638	0.0124003	1.90657	-0.0855567	1.00229	0.243365	0.613741	0.019729
TRAPPC3	O43617	Trafficking protein particle complex subunit 3	19.8252	19.7245	19.789	19.8716	19.6955	19.7983	19.8034	19.706	19.7821	2.33502	0.0394754	1.40367	0.124723	0.990787	0.211929	0.673809	0.0436026	2.95316	0.0228416	1.64127	0.0811208
CHMP2A	O43633	Charged multivesicular body protein 2a	19.4169	19.5692	19.6773	19.4834	19.5067	19.645	19.5909	19.373	19.7006	0.0638332	0.924539	0.0340749	0.0141169	1.53714	0.0924195	1.03424	-0.177237	1.47665	0.123484	0.90839	0.191353
NCK2	O43639	Cytoplasmic protein NCK2	17.8431	17.6064	17.8273	17.8485	17.639	17.7779	17.8649	17.6184	17.7929	4.42826	0.0071904	2.14325	0.230871	1.52212	0.0944889	1.02462	0.0528088	3.28474	0.0177494	1.75082	0.178062
TSPAN6	O43657	Tetraspanin-6	18.209	18.382	18.2103	18.3471	18.2915	18.11	18.149	18.2109	18.338	0.319442	0.650085	0.18703	-0.0597903	0.0611198	0.915245	0.0384625	0.0155551	0.38455	0.603376	0.219412	-0.0753454
PLRG1	O43660	Pleiotropic regulator 1	21.0361	21.2075	21.213	21.0618	21.1826	21.2064	21.1066	21.1225	21.2359	1.46369	0.121468	0.915539	-0.102695	2.58742	0.024197	1.61624	-0.150282	0.824193	0.314949	0.50176	0.0475864
PRC1	O43663	Protein regulator of cytokinesis 1	20.0611	20.2114	20.2374	20.1017	20.1909	20.1886	20.0612	20.1722	20.2604	2.57134	0.0298643	1.52485	-0.116812	2.44629	0.0283251	1.54783	-0.154067	0.708886	0.376989	0.423671	0.0372556
RGS10	O43665	Regulator of G-protein signaling 10	19.1915	19.1062	19.0201	19.0801	19.1254	19.1013	19.1988	19.0243	19.0842	0.654942	0.39597	0.402338	0.0714671	0.900853	0.242165	0.615888	0.0882161	0.158344	0.82025	0.0860538	-0.0167491
ZNF207	O43670	BUB3-interacting and GLEBS motif-containing protein ZNF207	20.2627	20.2942	20.053	20.1037	20.4192	20.1222	20.274	20.022	20.3419	0.086898	0.896288	0.0475523	-0.0316995	0.148553	0.802496	0.095557	0.0410849	0.19086	0.786274	0.104426	-0.0727844
NDUFB5	O43674	NADH dehydrogenase [ubiquinone] 1 beta subcomplex subunit 5, mitochondrial	19.2849	19.2394	19.5344	19.4749	19.169	19.3835	19.4247	19.1537	19.5029	1.52761	0.11125	0.953699	0.207452	0.46579	0.484727	0.314502	-0.0787385	2.24469	0.0474631	1.32364	0.28619
NDUFB3	O43676	NADH dehydrogenase [ubiquinone] 1 beta subcomplex subunit 3	19.6708	19.4538	19.516	19.7152	19.4597	19.4881	19.6683	19.4822	19.4627	3.63133	0.0104906	1.9792	0.219536	3.08164	0.0163865	1.78551	0.195862	0.600578	0.441998	0.35458	0.023674
NDUFA2	O43678	NADH dehydrogenase [ubiquinone] 1 alpha subcomplex subunit 2	19.5759	19.3803	19.1178	19.4224	19.3707	19.1129	19.5169	19.4509	19.1018	0.951424	0.256897	0.590241	0.10442	3.03059	0.0168674	1.77295	0.394212	3.45072	0.0159368	1.7976	-0.289792
ASNA1	O43681	ATPase ASNA1	20.3312	20.2964	20.0803	20.3653	20.2801	20.0882	20.2969	20.2487	20.2018	1.09003	0.208304	0.681302	0.0560824	2.03954	0.048541	1.31389	0.207649	1.65724	0.0977429	1.00991	-0.151566
BUB1	O43683	Mitotic checkpoint serine/threonine-protein kinase BUB1	16.5122	16.6478	16.497	16.4954	16.6228	16.51	16.5562	16.4674	16.5686	0.417091	0.56168	0.250511	-0.0580629	0.0470473	0.932444	0.0303771	-0.00392087	0.374761	0.612274	0.213054	-0.054142
BUB3	O43684	Mitotic checkpoint protein BUB3	21.7711	21.9124	21.9019	21.856	21.8777	21.8574	21.7689	21.9727	21.867	1.42553	0.128353	0.891596	-0.12227	1.13893	0.168788	0.772659	-0.0767835	0.668151	0.399217	0.398791	-0.0454865
ACTN4	O43707	Alpha-actinin-4	24.0956	24.2744	24.2334	24.1029	24.2755	24.2117	24.1339	24.1849	24.2634	1.8495	0.0705792	1.15132	-0.134124	2.56004	0.0248555	1.60458	-0.125369	0.0930432	0.893322	0.0489922	-0.00875473
GSTZ1	O43708	Maleylacetoacetate isomerase	19.6118	19.555	19.8565	19.7068	19.5349	19.7555	19.6344	19.6169	19.7584	1.01883	0.23101	0.636369	0.0820618	1.47162	0.102012	0.99135	-0.139127	2.23025	0.0478163	1.32042	0.221189
WBSCR22	O43709	Probable 18S rRNA (guanine-N(7))-methyltransferase	18.0925	17.9701	17.9369	18.0627	18.0171	17.9204	18.0378	18.0523	17.8908	0.829821	0.307982	0.511475	0.0511506	2.69018	0.0222159	1.65334	0.148295	1.62341	0.102154	0.990744	-0.0971444
TRIAP1	O43715	TP53-regulated inhibitor of apoptosis 1	18.9425	18.4779	18.9707	18.7969	18.5828	18.9761	18.7671	18.7877	18.8267	0.970836	0.248887	0.603997	0.21936	0.537951	0.433583	0.362927	-0.0889708	1.3925	0.138136	0.859692	0.308331
GATC	O43716	Glutamyl-tRNA(Gln) amidotransferase subunit C, mitochondrial	18.8614	18.7231	18.7732	18.7643	18.7431	18.854	18.8422	18.6981	18.8218	1.44978	0.12376	0.907418	0.101166	0.0578181	0.918636	0.0368563	0.00632858	1.61619	0.102997	0.987177	0.0948378
HTATSF1	O43719	HIV Tat-specific factor 1	21.7048	21.6908	21.6481	21.6709	21.7005	21.6524	21.725	21.5667	21.7581	0.445461	0.538738	0.268623	0.0475368	0.131117	0.822162	0.0850426	0.0140063	0.234819	0.745436	0.12759	0.0335306
AP1G1	O43747	AP-1 complex subunit gamma-1	21.5245	21.695	21.6524	21.6986	21.5587	21.6219	21.5506	21.7037	21.6434	0.355213	0.615955	0.210451	-0.0612221	0.364684	0.573949	0.241127	-0.0479914	0.0992634	0.885441	0.0528405	-0.0132306
STX6	O43752	Syntaxin-6	14.5742	14.5955	14.6985	14.5828	14.806	14.6124	14.7171	14.4478	14.6956	0.0242106	0.970757	0.0128894	0.00823307	0.33648	0.600232	0.221681	-0.0441777	0.18581	0.792157	0.101189	0.0524108
SYNGR1	O43759	Synaptogyrin-1	16.327	16.3541	16.8928	16.538	16.2862	16.6932	16.3048	16.5828	16.6651	0.0524895	0.93576	0.0288354	-0.0177689	1.60029	0.0856241	1.0674	-0.360399	1.3915	0.138213	0.859451	0.34263
SYNGR2	O43760	Synaptogyrin-2	17.9354	17.9036	18.2904	18.0701	17.9289	18.1097	17.9053	18.2122	17.9759	0.149525	0.824541	0.083788	-0.0446053	0.675315	0.345372	0.461713	-0.15505	0.339464	0.642485	0.192137	0.110444
SGTA	O43765	Small glutamine-rich tetratricopeptide repeat-containing protein alpha	21.6315	21.6377	21.6767	21.5287	21.7018	21.704	21.6461	21.5439	21.7117	0.164423	0.809583	0.0917387	-0.0257187	1.16659	0.161866	0.790843	-0.0953687	0.671725	0.397137	0.40106	0.06965
ENSA	O43768	Alpha-endosulfine	21.5466	21.3686	21.2965	21.3413	21.4393	21.3353	21.5082	21.2784	21.353	0.588546	0.436714	0.359803	0.103284	0.986048	0.213246	0.67112	0.137098	0.274221	0.705151	0.151718	-0.0338147
SLC25A20	O43772	Mitochondrial carnitine/acylcarnitine carrier protein	18.6931	18.7406	18.9353	18.865	18.6792	18.848	18.7052	18.8413	18.8794	0.00328549	0.995587	0.00192097	0.000731786	1.02471	0.201096	0.696596	-0.133131	1.17149	0.190453	0.720212	0.133863
NARS	O43776	Asparagine--tRNA ligase, cytoplasmic	22.5235	22.7483	22.6766	22.5578	22.7252	22.6857	22.6002	22.6047	22.7554	1.24838	0.163619	0.786166	-0.132244	1.91963	0.0560448	1.25146	-0.145414	0.0920605	0.893815	0.0487523	0.0131702
SPOP	O43791	Speckle-type POZ protein	15.2729	15.1851	15.2659	15.374	15.2523	15.1819	15.2901	15.115	15.3001	1.19426	0.178036	0.749492	0.128212	0.600853	0.390826	0.408017	0.06307	0.543507	0.480545	0.318266	0.065142
MYO1B	O43795	Unconventional myosin-Ib	21.1524	21.2639	21.0954	21.2062	21.2094	21.1265	21.1575	21.2529	21.1299	1.36951	0.138679	0.85799	-0.0700665	1.26202	0.140746	0.851564	0.0547339	2.47929	0.0368573	1.43348	-0.1248
SSNA1	O43805	Sjoegren syndrome nuclear autoantigen 1	18.2765	17.9928	18.0429	18.2079	18.053	18.0942	18.2236	18.0608	18.057	2.59005	0.029327	1.53273	0.200457	2.57349	0.0244702	1.61136	0.171307	0.47983	0.526717	0.278423	0.0291506
SLC25A17	O43808	Peroxisomal membrane protein PMP34	17.3944	17.3752	17.5474	17.5992	17.2154	17.5284	17.3556	17.3749	17.6061	0.621897	0.415818	0.381097	0.127874	0.631373	0.371801	0.429689	-0.110909	1.83044	0.0776437	1.10989	0.238782
NUDT21	O43809	Cleavage and polyadenylation specificity factor subunit 5	21.6481	21.7908	21.8308	21.7258	21.7648	21.823	21.6621	21.8367	21.781	1.69357	0.087643	1.05728	-0.118772	2.02172	0.0496165	1.30437	-0.132915	0.209983	0.766677	0.115388	0.0141436
LANCL1	O43813	LanC-like protein 1	19.991	20.1653	20.1492	20.0182	20.1175	20.1561	19.9909	20.217	20.0945	2.28228	0.0418688	1.37811	-0.166574	2.46198	0.0278635	1.55496	-0.133242	0.407667	0.583063	0.234285	-0.0333316
STRN	O43815	Striatin	20.1262	20.0643	20.1086	20.0963	20.0452	20.1535	20.1565	19.9965	20.1519	1.57124	0.104993	0.978838	0.0909875	0.196669	0.74533	0.127651	-0.0116558	1.83234	0.0775033	1.11068	0.102643
RRP9	O43818	U3 small nucleolar RNA-interacting protein 2	20.2381	20.3068	20.2684	20.2306	20.2463	20.3167	20.2207	20.3066	20.2657	1.28277	0.156552	0.805341	-0.0567633	1.4442	0.106467	0.972784	-0.0538349	0.0381113	0.955344	0.0198403	-0.00292842
SCO2	O43819	Protein SCO2 homolog, mitochondrial	19.4428	19.3042	19.3547	19.4733	19.3011	19.291	19.4143	19.3121	19.3423	2.86625	0.0219097	1.65936	0.1377	1.93521	0.0551532	1.25843	0.114119	0.524649	0.494743	0.305621	0.0235806
AKAP8	O43823	A-kinase anchor protein 8	19.5016	19.5118	19.3854	19.5063	19.4947	19.3563	19.5468	19.435	19.384	0.620017	0.416703	0.380173	0.0377337	2.94337	0.0176421	1.75345	0.142975	1.85762	0.0748882	1.12559	-0.105242
GTPBP6	O43824	Putative GTP-binding protein 6	17.1429	17.0097	17.1357	17.1442	17.0109	17.0648	16.9583	17.164	17.0202	0.0898835	0.892759	0.0492656	0.0202643	0.0398817	0.9422	0.0258569	0.00824865	0.0684878	0.920923	0.0357766	0.0120157
SLC37A4	O43826	Glucose-6-phosphate translocase	17.7543	17.6702	17.9757	17.8367	17.6895	17.8428	17.7564	17.8393	17.8165	0.341496	0.629915	0.200718	0.0494696	0.786176	0.288957	0.539166	-0.0958303	0.934525	0.268832	0.570519	0.1453
IDH3B	O43837	Isocitrate dehydrogenase [NAD] subunit beta, mitochondrial	21.4771	21.4473	21.5541	21.507	21.4012	21.5595	21.4743	21.397	21.5959	1.67728	0.0895892	1.04774	0.0709267	2.12049	0.0436706	1.35981	-0.0837326	2.75856	0.0283113	1.54804	0.154659
NRD1	O43847	Nardilysin	21.6279	21.7739	21.7199	21.669	21.7402	21.7208	21.659	21.694	21.7853	1.48352	0.118244	0.927222	-0.0840912	1.6471	0.0805849	1.09375	-0.090016	0.0650346	0.924751	0.033975	0.00592486
CALU	O43852	Calumenin	22.1718	22.0855	22.1622	22.0562	22.1759	22.1592	22.2627	21.7154	22.3663	0.487493	0.507948	0.294181	0.171338	0.292134	0.641384	0.192882	-0.065637	0.688492	0.387845	0.411342	0.236975
AHCYL1	O43865	Putative adenosylhomocysteinase 2	21.7535	21.8061	21.7967	21.7757	21.7437	21.7715	21.7167	21.7632	21.7924	0.370915	0.603261	0.219495	-0.0223541	0.947355	0.226092	0.645714	-0.0382341	0.325946	0.654783	0.183903	0.0158799
KIF1C	O43896	Kinesin-like protein KIF1C	17.8236	17.9337	17.7365	17.9236	17.9142	17.7444	17.8637	17.8876	17.8087	0.579169	0.443605	0.353004	-0.041584	1.35331	0.122767	0.910918	0.107065	2.30522	0.0444642	1.35199	-0.148649
ORC5	O43913	Origin recognition complex subunit 5	18.8488	19.0423	19.1901	19.0492	18.9591	19.0961	18.8649	19.2074	19.0229	0.696499	0.371659	0.429856	-0.14863	1.06338	0.189874	0.721535	-0.182086	0.141556	0.839398	0.0760321	0.0334568
NDUFS5	O43920	NADH dehydrogenase [ubiquinone] iron-sulfur protein 5	20.1746	20.0276	20.1686	20.2023	20.0249	20.1511	20.1739	20.0451	20.144	3.74686	0.00943623	2.0252	0.151082	1.15112	0.165521	0.781147	0.0290445	3.64252	0.0136341	1.86537	0.122037
PDE6D	O43924	Retinal rod rhodopsin-sensitive cGMP 3,5-cyclic phosphodiesterase subunit delta	17.9256	18.1409	18.2457	18.1943	17.8793	18.2692	17.9503	18.1122	18.2087	0.0601105	0.928722	0.0321144	-0.0206763	1.16989	0.161232	0.792548	-0.217789	1.09441	0.21218	0.673295	0.197112
PEX1	O43933	Peroxisome biogenesis factor 1	15.3808	15.2637	15.2858	15.3639	15.1729	15.3527	15.2606	15.3852	15.256	0.352901	0.618394	0.208735	0.0611776	0.321204	0.614851	0.21123	0.036973	0.131223	0.850096	0.0705322	0.0242046
RAD21	O60216	Double-strand-break repair protein rad21 homolog	20.6959	20.7899	20.7517	20.6865	20.8282	20.7677	20.7304	20.6595	20.8659	0.44823	0.537492	0.269628	-0.0549692	1.12213	0.172736	0.762616	-0.0908782	0.225427	0.752919	0.123252	0.035909
TIMM8A	O60220	Mitochondrial import inner membrane translocase subunit Tim8 A	17.788	17.6195	18.1509	17.7091	17.7797	18.0839	17.8481	17.5507	18.1469	0.769118	0.334505	0.475597	0.131744	2.78447	0.0203386	1.69168	-0.34553	2.58839	0.0331851	1.47906	0.477275
DHX16	O60231	Putative pre-mRNA-splicing factor ATP-dependent RNA helicase DHX16	21.0737	21.2091	21.0623	21.0784	21.1813	21.1006	21.0721	21.1725	21.1246	3.2617	0.0150065	1.82372	-0.112857	0.50493	0.456129	0.340912	-0.021073	1.9043	0.071028	1.14857	-0.0917842
SSSCA1	O60232	Sjoegren syndrome/scleroderma autoantigen 1	19.4886	19.5437	19.4894	19.3652	19.5773	19.5897	19.5678	19.3888	19.5691	0.130731	0.847149	0.0720404	-0.0294234	0.496906	0.461106	0.336199	-0.0756003	0.283709	0.695519	0.157691	0.0461769
MED14	O60244	Mediator of RNA polymerase II transcription subunit 14	17.8236	17.9481	17.935	17.8827	17.8171	17.989	17.8312	17.8998	17.931	0.426882	0.554343	0.256222	-0.0424932	1.79921	0.0658066	1.18173	-0.105837	0.675381	0.394897	0.403516	0.0633437
PCDH7	O60245	Protocadherin-7	16.5613	16.3064	16.1747	16.5614	16.2304	16.2229	16.5177	16.306	16.2732	3.09516	0.0175793	1.755	0.265889	3.27078	0.0139143	1.85654	0.323177	0.685263	0.389498	0.409495	-0.0572872
PRPSAP2	O60256	Phosphoribosyl pyrophosphate synthase-associated protein 2	21.5062	21.6831	21.6427	21.5601	21.6163	21.6196	21.6105	21.4385	21.7511	0.0918997	0.890825	0.0502076	-0.0203559	1.04411	0.195409	0.709055	-0.112238	0.47761	0.527982	0.277381	0.0918821
SMARCA5	O60264	SWI/SNF-related matrix-associated actin-dependent regulator of chromatin subfamily A member 5	23.546	23.4325	23.45	23.5395	23.4096	23.462	23.5033	23.4562	23.4355	2.16342	0.0477753	1.3208	0.0968355	2.20188	0.0392614	1.40603	0.0804062	0.458185	0.543742	0.264607	0.0164293
SPAG9	O60271	C-Jun-amino-terminal kinase-interacting protein 4	21.5365	21.6089	21.7045	21.5924	21.5719	21.6557	21.6117	21.5499	21.686	0.0395483	0.948433	0.0229934	0.00330162	1.7279	0.0719703	1.14285	-0.101897	2.03371	0.0604856	1.21835	0.105199
SUSD5	O60279	Sushi domain-containing protein 5	16.9	16.9728	16.95	17.0157	17.0857	16.6685	16.9047	17.1095	16.7264	0.957646	0.254315	0.594628	-0.115849	0.77903	0.292589	0.533742	0.158484	1.34165	0.149033	0.826718	-0.274332
ZNF292	O60281	Zinc finger protein 292	14.764	14.9788	14.8209	15.05	14.9567	14.5886	14.936	15.0424	14.7394	0.364575	0.608431	0.215789	-0.0759462	0.867801	0.254689	0.59399	0.200363	1.71843	0.0907319	1.04224	-0.276309
KIF5C	O60282	Kinesin heavy chain isoform 5C	18.3243	18.5478	18.4642	18.3125	18.5871	18.4212	18.3174	18.5412	18.4643	4.08404	0.00847828	2.07169	-0.240595	3.06231	0.0165775	1.78048	-0.131792	2.2348	0.0478163	1.32042	-0.108803
URB1	O60287	Nucleolar pre-ribosomal-associated protein 1	19.5947	19.7951	19.6682	19.687	19.6814	19.6794	19.6171	19.7194	19.7339	1.07126	0.214033	0.66952	-0.0990588	0.820056	0.274218	0.561904	-0.0609214	0.414896	0.577874	0.238167	-0.0381374
MGRN1	O60291	E3 ubiquitin-protein ligase MGRN1	14.773	14.9265	14.8374	14.9879	14.5683	14.9208	14.811	14.8495	14.9259	0.233805	0.734126	0.134229	0.0758514	0.199555	0.742719	0.129175	-0.0374066	0.430274	0.566015	0.247172	0.113258
ZFC3H1	O60293	Zinc finger C3H1 domain-containing protein	18.9922	19.1567	19.1084	19.0045	19.1323	19.1566	19.0332	19.1011	19.128	2.39833	0.0367218	1.43508	-0.120089	2.545	0.0251917	1.59874	-0.121013	0.0143341	0.982593	0.00762646	0.000923793
LCMT2	O60294	tRNA wybutosine-synthesizing protein 4	16.9252	16.9122	17.0115	16.8978	16.8699	17.0944	16.8867	16.9054	17.0078	0.158661	0.815286	0.0886902	0.00736936	1.93666	0.0551149	1.25873	-0.134686	1.9838	0.064531	1.19023	0.142055
AQR	O60306	Intron-binding protein aquarius	20.8596	20.9608	20.9724	20.9204	21.0013	20.917	20.8976	20.9002	21.0268	0.831377	0.307511	0.51214	-0.061526	1.02762	0.200342	0.698227	-0.0794805	0.155457	0.82327	0.0844576	0.0179545
MAST3	O60307	Microtubule-associated serine/threonine-protein kinase 3	11.548	11.161	11.4845	11.3623	11.0987	11.7245	11.7144	11.0852	11.4093	1.82421	0.0734209	1.13418	0.426584	0.00490284	0.993103	0.00300569	0.00208346	1.91086	0.0706885	1.15065	0.424501
OPA1	O60313	Dynamin-like 120 kDa protein, mitochondrial;Dynamin-like 120 kDa protein, form S1	21.0224	21.0723	21.1916	21.0481	21.0567	21.1819	21.0895	20.9545	21.2378	0.240644	0.727475	0.138182	0.0255051	2.34993	0.0320338	1.49439	-0.150428	1.90365	0.071028	1.14857	0.175933
ZEB2	O60315	Zinc finger E-box-binding homeobox 2	15.5539	15.3685	15.354	15.5182	15.4363	15.2776	15.4514	15.5251	15.294	0.521138	0.485202	0.314077	0.0645301	2.20043	0.0393583	1.40496	0.199315	1.24219	0.17138	0.76604	-0.134785
MCM3AP	O60318	Germinal-center associated nuclear protein	17.8734	17.8743	17.8144	17.8449	17.9162	17.9207	17.8686	17.8845	17.9021	0.889746	0.281122	0.551105	-0.0293706	0.188846	0.753537	0.122896	-0.0167618	0.13207	0.849405	0.0708851	-0.0126088
PCDHGA12	O60330	Protocadherin gamma-A12	17.8592	17.9514	18.2364	18.1662	17.9916	17.8884	17.9841	18.2192	17.9823	0.156036	0.817267	0.0876363	-0.05089	0.0840654	0.886192	0.0524722	-0.0325076	0.0472314	0.945054	0.0245434	-0.0183824
KIF1B	O60333	Kinesin-like protein KIF1B	17.4707	17.4039	17.4083	17.3966	17.4237	17.3861	17.6058	17.1986	17.4412	0.721349	0.358535	0.445468	0.148989	0.554206	0.421814	0.374879	0.0791645	0.400966	0.588798	0.230034	0.0698249
2021-03-06	O60337	E3 ubiquitin-protein ligase MARCH6	12.7975	12.618	12.6955	12.838	12.7529	12.5825	12.6359	12.5383	12.9399	0.616975	0.418575	0.378227	0.120776	0.0501674	0.928371	0.0322784	0.0178525	0.348117	0.635696	0.19675	0.102923
KDM1A	O60341	Lysine-specific histone demethylase 1A	20.8565	20.9109	20.9426	20.8504	20.9123	20.9259	20.8252	20.949	20.9291	2.15432	0.0482588	1.31642	-0.0800349	2.91167	0.0180379	1.74381	-0.0884927	0.248402	0.733171	0.134795	0.00845782
TBC1D4	O60343	TBC1 domain family member 4	21.1516	21.0812	21.0876	21.1474	21.0565	21.1119	21.137	21.1052	21.0883	1.92602	0.063885	1.1946	0.0643927	2.25541	0.036505	1.43765	0.0494595	0.389736	0.598235	0.223128	0.0149333
ECE2	O60344	Endothelin-converting enzyme 2;Methyltransferase-like region;Endothelin-converting enzyme 2 region	15.9781	15.8028	15.7889	15.9087	15.8571	15.884	15.9469	15.7416	15.9975	1.68125	0.089255	1.04937	0.144036	0.356423	0.580845	0.23594	0.054409	0.579598	0.455456	0.341553	0.0896269
TBC1D12	O60347	TBC1 domain family member 12	13.6051	13.5114	13.7194	13.1477	13.5786	13.7511	13.0825	13.8336	13.4705	0.882543	0.283822	0.546954	-0.362754	0.921437	0.234128	0.630547	-0.368536	0.0144685	0.982593	0.00762646	0.00578149
FADS1	O60427	Fatty acid desaturase 1	18.4101	18.5725	18.4087	18.3858	18.568	18.4445	18.3518	18.5333	18.442	2.95104	0.0198904	1.70136	-0.175325	1.12821	0.171053	0.766869	-0.0491104	2.76154	0.0281822	1.55003	-0.126215
PPL	O60437	Periplakin	16.0009	15.9321	16.3934	16.2263	16.0211	15.9047	16.0935	15.7203	16.3838	0.91038	0.274044	0.562179	0.215743	0.277992	0.655203	0.183624	-0.120393	0.846731	0.304051	0.517053	0.336137
DFNA5	O60443	Non-syndromic hearing impairment protein 5	14.4392	14.7709	14.6905	14.6441	14.6804	14.5776	14.3668	14.8373	14.6824	1.37815	0.137018	0.863221	-0.279487	0.855191	0.259614	0.585671	-0.166782	0.903039	0.280121	0.552654	-0.112705
EVI5	O60447	Ecotropic viral integration site 5 protein homolog	14.5558	14.2241	14.3633	14.6071	14.3622	14.1326	14.4892	14.3086	14.3395	2.05852	0.054236	1.26571	0.252416	1.55127	0.0909695	1.0411	0.272219	0.0838999	0.903331	0.0441529	-0.0198034
NRP2	O60462	Neuropilin-2	12.8866	13.0045	12.7557	12.8653	12.7666	13.1905	12.8225	12.9855	12.9873	0.316209	0.653073	0.185038	-0.0607548	0.398734	0.540671	0.267067	-0.119725	0.149479	0.829241	0.0813193	0.0589701
MAN1A2	O60476	Mannosyl-oligosaccharide 1,2-alpha-mannosidase IB	17.1779	17.2329	17.0987	17.203	17.1625	17.1587	17.1252	17.0783	17.2496	0.0757309	0.910384	0.0407754	0.0108229	0.00185376	0.996862	0.00136496	-0.000281016	0.0615373	0.928321	0.0323019	0.0111039
ACSL4	O60488	Long-chain-fatty-acid--CoA ligase 4	21.5419	21.5521	21.6589	21.6234	21.5011	21.6144	21.5468	21.601	21.612	0.188822	0.78279	0.106355	0.0193011	0.882115	0.248333	0.604965	-0.0577062	1.1096	0.207399	0.683193	0.0770073
SNX3	O60493	Sorting nexin-3	21.1242	21.0482	21.0574	21.1067	21.04	21.1178	21.1405	20.997	21.0763	2.16249	0.0477753	1.3208	0.0953655	0.917694	0.235476	0.628054	0.0399583	1.09088	0.213148	0.671319	0.0554072
STX10	O60499	Syntaxin-10	17.017	17.0084	16.9485	16.9694	17.1209	17.0167	17.0684	16.966	17.0529	0.0883239	0.894664	0.0483402	-0.0135059	0.105286	0.857638	0.0666961	0.0122382	0.176189	0.802755	0.0954172	-0.0257441
MGEA5	O60502	Protein O-GlcNAcase	21.0531	21.2042	21.0496	20.9916	21.2375	21.0716	20.9813	21.2293	21.0902	3.02922	0.0182706	1.73825	-0.215012	1.1486	0.166212	0.779338	-0.061779	3.23865	0.0179869	1.74504	-0.153233
SORBS3	O60504	Vinexin	14.7425	14.2832	14.5297	14.5592	14.8685	14.5054	14.6338	14.5145	14.5462	0.193016	0.779374	0.108254	0.0897595	1.01567	0.204227	0.689888	0.118018	0.0572553	0.932052	0.0305598	-0.028258
SYNCRIP	O60506	Heterogeneous nuclear ribonucleoprotein Q	24.3685	24.4386	24.3136	24.3167	24.5094	24.2937	24.4302	24.152	24.486	0.0148898	0.981196	0.00824415	0.00512822	0.0358775	0.948448	0.0229866	0.00734329	0.00580343	0.992885	0.00310113	-0.00221507
TPST1	O60507	Protein-tyrosine sulfotransferase 1	13.7014	13.4698	13.5388	13.4743	13.6149	13.6983	13.6346	13.414	13.7856	0.503738	0.495828	0.304669	0.103859	0.289699	0.643058	0.19175	-0.0708157	0.865734	0.295022	0.530146	0.174675
CDC40	O60508	Pre-mRNA-processing factor 17	19.7473	19.8123	19.8479	19.8077	19.7478	19.8755	19.8595	19.6744	19.8795	0.512206	0.489667	0.310099	0.0600046	0.861151	0.257389	0.589409	-0.0627969	1.39534	0.137642	0.861249	0.122801
B4GALT3	O60512	Beta-1,4-galactosyltransferase 3;N-acetyllactosamine synthase;Beta-N-acetylglucosaminylglycopeptide beta-1,4-galactosyltransferase;Beta-N-acetylglucosaminyl-glycolipid beta-1,4-galactosyltransferase	13.7587	13.3796	13.5414	13.4681	13.6793	13.609	13.6052	13.7166	13.479	0.04759	0.939541	0.0270841	0.0188605	0.298138	0.636627	0.196115	0.0675545	0.161796	0.815986	0.0883175	-0.048694
RANBP6	O60518	Ran-binding protein 6	16.4883	16.3958	16.2971	16.4643	16.3381	16.4037	16.2789	16.4915	16.3973	0.00846487	0.989915	0.00440198	0.00205612	0.234175	0.702301	0.153477	0.0444934	0.305918	0.673731	0.171513	-0.0424372
NEMF	O60524	Nuclear export mediator factor NEMF	19.7326	19.9195	19.8351	19.7597	19.9337	19.7971	19.7622	19.9206	19.8324	4.09975	0.00847828	2.07169	-0.173119	1.9739	0.0524478	1.28027	-0.0700569	2.85287	0.0254046	1.59509	-0.103062
GMDS	O60547	GDP-mannose 4,6 dehydratase	19.4752	19.7333	19.7873	19.4788	19.6887	19.7998	19.5388	19.6557	19.8036	2.51248	0.0320903	1.49363	-0.194951	3.83555	0.00837562	2.07698	-0.299309	1.97791	0.0651398	1.18615	0.104357
NMT2	O60551	Glycylpeptide N-tetradecanoyltransferase 2	16.7223	16.8865	16.6129	16.7017	16.8603	16.6714	16.8398	16.7181	16.7711	0.422329	0.558092	0.253294	-0.0670579	0.477771	0.475899	0.322485	0.0694644	0.913553	0.275767	0.559458	-0.136522
CCNT1	O60563	Cyclin-T1	19.1606	18.9878	19.0749	19.1197	18.9641	19.1377	19.1707	18.9883	19.0683	3.2013	0.0160721	1.79393	0.170254	0.981471	0.214906	0.667751	0.0566832	2.07166	0.0578718	1.23753	0.113571
BUB1B	O60566	Mitotic checkpoint serine/threonine-protein kinase BUB1 beta	18.5011	18.3729	18.4577	18.5075	18.3687	18.4474	18.4956	18.3543	18.4752	4.4862	0.0071904	2.14325	0.136138	2.02611	0.0493882	1.30638	0.0412668	3.1833	0.0187279	1.72751	0.0948715
PLOD3	O60568	Procollagen-lysine,2-oxoglutarate 5-dioxygenase 3	20.5536	20.52	20.5695	20.6015	20.4893	20.5494	20.5752	20.494	20.5808	1.96624	0.0606708	1.21702	0.0756715	0.242727	0.693067	0.159225	0.0102151	2.10731	0.0552914	1.25734	0.0654564
EIF4E2	O60573	Eukaryotic translation initiation factor 4E type 2	18.3262	18.5868	18.4451	18.4298	18.4812	18.4588	18.3377	18.5517	18.4995	1.74983	0.0816913	1.08782	-0.175339	1.31972	0.129072	0.889168	-0.103217	0.962196	0.257341	0.589491	-0.0721219
CCNT2	O60583	Cyclin-T2	14.7162	14.8979	14.7407	14.9523	14.7053	14.5822	14.3264	14.8496	14.9017	0.328062	0.641962	0.192491	-0.152654	0.138488	0.814093	0.0893258	-0.0765893	0.281285	0.697807	0.156264	-0.0760644
DIAPH1	O60610	Protein diaphanous homolog 1	21.8758	21.9181	21.8683	21.9274	21.8719	21.8728	21.8669	21.9029	21.8912	0.119443	0.859086	0.0659634	-0.00761286	0.247529	0.687906	0.162471	0.0125694	0.589086	0.44933	0.347435	-0.0201823
2021-09-15	O60613	15 kDa selenoprotein	18.4061	18.3521	17.0523	18.3892	18.2905	16.9941	18.353	18.1693	17.1759	0.93753	0.262708	0.580527	0.11213	4.7069	0.00569057	2.24484	1.30868	4.0251	0.0119906	1.92116	-1.19655
TSPAN3	O60637	Tetraspanin-3	17.801	17.7624	17.4114	18.0203	17.7258	17.2777	17.9276	17.9465	17.1383	0.488638	0.507449	0.294607	0.104713	2.49514	0.0265725	1.57557	0.640472	2.16697	0.0517858	1.28579	-0.535758
EXOC3	O60645	Exocyst complex component 3	18.8547	18.9348	18.8918	18.8551	18.926	18.8746	18.8414	18.8586	18.9282	1.07691	0.212115	0.673429	-0.0560824	1.35873	0.121672	0.914811	-0.0477975	0.103541	0.880829	0.0551084	-0.00828489
PDE8A	O60658	High affinity cAMP-specific and IBMX-insensitive 3,5-cyclic phosphodiesterase 8A	12.7536	12.8055	12.6935	12.5422	12.8645	13.0288	12.6185	12.7243	12.9202	1.01514	0.232117	0.634294	-0.159992	0.976256	0.216321	0.664902	-0.242738	0.31717	0.663234	0.178333	0.0827456
KLHL41	O60662	Kelch-like protein 41	13.9363	13.6946	13.8213	13.999	13.6434	13.53	13.5843	13.8458	13.8141	0.321942	0.647909	0.188486	0.111931	0.297944	0.63677	0.196017	0.118055	0.0179229	0.978699	0.00935084	-0.00612354
PLIN3	O60664	Perilipin-3	20.6744	20.7385	20.6567	20.5845	20.7307	20.747	20.6791	20.643	20.7359	0.598948	0.430132	0.366398	-0.0580908	0.734941	0.313763	0.503398	-0.0671781	0.0765108	0.912645	0.0396982	0.00908724
RAD1	O60671	Cell cycle checkpoint protein RAD1	15.4743	15.4957	15.4988	15.7028	15.2892	15.5127	15.442	15.2889	15.6622	0.782394	0.329371	0.482315	0.181769	0.0651538	0.910218	0.0408543	-0.0182104	1.08711	0.214402	0.66877	0.199979
MAFK	O60675	Transcription factor MafK	17.2274	17.0534	17.1607	17.0953	16.8887	17.3491	17.1476	16.9836	17.2915	1.38285	0.13623	0.865728	0.181553	0.748322	0.307039	0.512806	-0.110329	1.78422	0.0830773	1.08052	0.291882
PRMT3	O60678	Protein arginine N-methyltransferase 3	21.082	21.2606	21.2664	21.1409	21.191	21.2905	21.1486	21.1335	21.337	0.774314	0.332643	0.478021	-0.0711835	2.38217	0.0307933	1.51154	-0.174112	1.1468	0.197204	0.705083	0.102928
PEX10	O60683	Peroxisome biogenesis factor 10	13.9231	13.8431	13.9052	13.799	14.1162	13.9026	13.8923	14.1259	13.851	0.71808	0.359717	0.444039	-0.156919	0.132029	0.821225	0.0855381	-0.0148131	0.685088	0.389498	0.409495	-0.142105
KPNA6	O60684	Importin subunit alpha-7	19.8742	19.8491	19.8089	19.8583	19.8007	19.8804	19.8306	19.8191	19.8879	0.760866	0.338306	0.470691	0.031414	0.0579336	0.918636	0.0368563	-0.0047245	0.554819	0.47243	0.325662	0.0361385
UGDH	O60701	UDP-glucose 6-dehydrogenase	20.6586	20.8847	20.8036	20.6308	20.8773	20.8484	20.659	20.7829	20.9052	2.36778	0.0379787	1.42046	-0.198839	2.55896	0.0248671	1.60438	-0.202944	0.031431	0.963077	0.0163389	0.00410461
TPST2	O60704	Protein-tyrosine sulfotransferase 2	13.818	13.2155	13.416	13.6382	13.253	13.6727	13.6873	13.2996	13.4861	2.83264	0.0226961	1.64405	0.458435	0.948208	0.225903	0.646077	0.189516	1.5424	0.113639	0.944474	0.268919
CTNND1	O60716	Catenin delta-1	21.4216	21.4521	21.3325	21.3955	21.4842	21.3332	21.453	21.4002	21.3758	0.304775	0.665936	0.176567	-0.0221513	1.59399	0.0861441	1.06477	0.0762094	1.59152	0.106406	0.973034	-0.0983607
ICMT	O60725	Protein-S-isoprenylcysteine O-methyltransferase	17.5584	17.4879	17.5691	17.5354	17.4571	17.6128	17.4642	17.558	17.5915	0.168456	0.805311	0.0940363	0.0183748	1.08655	0.182892	0.737805	-0.0717506	1.30317	0.157783	0.801941	0.0901254
EIF1B	O60739	Eukaryotic translation initiation factor 1b	15.881	15.9375	15.971	15.9797	15.8459	15.9728	15.9942	15.7172	16.0593	0.740783	0.348017	0.458399	0.118125	0.463991	0.486159	0.313222	-0.0493542	1.12127	0.204692	0.6889	0.167479
SNX2	O60749	Sorting nexin-2	21.9408	22.0211	21.9206	21.9698	21.9672	21.9522	21.9178	22.0427	21.9225	1.17578	0.18284	0.737928	-0.0675538	0.239638	0.696171	0.157284	0.0110512	1.47711	0.123484	0.90839	-0.078605
DPM1	O60762	Dolichol-phosphate mannosyltransferase subunit 1	20.0949	20.0855	20.2596	20.1886	20.0116	20.2502	20.1077	20.121	20.2319	0.591673	0.434615	0.361895	0.0576808	1.73376	0.0716258	1.14493	-0.116843	2.20169	0.0493911	1.30635	0.174524
USO1	O60763	General vesicular transport factor p115	21.9672	22.0466	22.0276	22.0143	22.04	21.9917	21.9791	21.984	22.0857	0.683878	0.378058	0.422442	-0.0366573	0.713339	0.32379	0.489736	-0.0481472	0.124184	0.857257	0.066889	0.0114899
MRPS14	O60783	28S ribosomal protein S14, mitochondrial	17.4235	17.393	17.2245	17.3634	17.4246	17.2722	17.464	17.2584	17.3185	0.424111	0.557194	0.253994	0.0583572	1.6593	0.0791739	1.10142	0.145266	0.684915	0.389498	0.409495	-0.0869083
TOM1	O60784	Target of Myb protein 1	19.3384	19.4311	19.1402	19.2623	19.4343	19.2374	19.3619	19.2375	19.3607	0.260034	0.709262	0.149193	-0.0468006	0.457504	0.491213	0.30873	0.0747871	0.596777	0.444605	0.352026	-0.121588
PFKFB2	O60825	6-phosphofructo-2-kinase/fructose-2,6-bisphosphatase 2;6-phosphofructo-2-kinase;Fructose-2,6-bisphosphatase	18.9938	19.172	19.2651	19.1306	19.049	19.2287	18.9916	19.2743	19.1891	0.725803	0.356391	0.448074	-0.126417	1.68427	0.0765147	1.11626	-0.18893	0.382429	0.605397	0.21796	0.0625134
CCDC22	O60826	Coiled-coil domain-containing protein 22	19.8482	19.8353	19.7524	19.8203	19.8457	19.7964	19.8262	19.8593	19.7703	0.621334	0.416146	0.380754	-0.0151749	1.72268	0.0728007	1.13786	0.0585327	2.14576	0.0527135	1.27808	-0.0737076
PQBP1	O60828	Polyglutamine-binding protein 1	20.659	20.5358	20.5906	20.5479	20.5986	20.6355	20.6488	20.5235	20.6176	0.709945	0.364209	0.43865	0.0659307	0.0355966	0.948733	0.0228561	0.00397301	1.09178	0.212916	0.671793	0.0619577
TIMM17B	O60830	Mitochondrial import inner membrane translocase subunit Tim17-B	19.1808	19.3269	19.2129	19.2333	19.2697	19.2043	19.2783	19.0596	19.4242	0.0482315	0.939418	0.0271413	0.0121034	0.25525	0.6798	0.167619	-0.0496159	0.221893	0.756551	0.121162	0.0617193
PRAF2	O60831	PRA1 family protein 2	17.7227	17.7317	17.92	17.5759	17.898	17.8839	17.7019	17.8138	17.8444	1.04435	0.221817	0.654006	-0.147644	1.88104	0.0590778	1.22858	-0.215894	0.576106	0.457131	0.33996	0.06825
DKC1	O60832	H/ACA ribonucleoprotein complex subunit 4	22.0263	22.0965	22.097	22.0833	22.1248	21.9973	22.0499	22.1094	22.0647	1.43887	0.125922	0.899899	-0.057059	0.00207624	0.996862	0.00136496	0.000214259	0.874925	0.290614	0.536684	-0.0572732
EIF5B	O60841	Eukaryotic translation initiation factor 5B	22.5865	22.619	22.4923	22.5677	22.6241	22.4763	22.6033	22.4539	22.6425	0.130649	0.847172	0.0720282	0.0202065	0.380455	0.559314	0.252344	0.0488262	0.137297	0.843482	0.0739242	-0.0286198
EDF1	O60869	Endothelial differentiation-related factor 1	21.1243	21.156	21.0196	21.1018	21.1091	21.0431	21.1214	21.1068	21.0246	0.175367	0.796854	0.098621	-0.00809733	3.0042	0.0171229	1.76642	0.0867449	2.24609	0.0473651	1.32454	-0.0948423
KIN	O60870	DNA/RNA-binding protein KIN17	19.962	20.0027	19.9583	19.9685	20.0241	19.9294	20.0208	19.8455	20.0366	0.167786	0.806017	0.0936556	0.0263666	0.0860996	0.883644	0.0537226	0.00899188	0.0959471	0.890278	0.0504745	0.0173747
DIAPH2	O60879	Protein diaphanous homolog 2	18.9445	19.1279	19.0828	18.934	19.1123	19.0919	19.0496	18.9	19.2014	0.358045	0.613396	0.212259	-0.07072	1.31763	0.129547	0.887573	-0.149331	0.402073	0.587911	0.230688	0.0786107
DNAJA2	O60884	DnaJ homolog subfamily A member 2	21.3179	21.2571	21.2847	21.4175	21.2568	21.2579	21.3567	21.2662	21.3021	1.63085	0.0958495	1.01841	0.104036	1.22239	0.149069	0.826611	0.0825157	0.746688	0.356275	0.448215	0.0215206
BRD4	O60885	Bromodomain-containing protein 4	21.2476	21.24	21.2199	21.2067	21.2148	21.2784	21.2342	21.2525	21.2398	0.141435	0.833966	0.0788519	-0.00624402	0.323837	0.612578	0.212839	-0.0165259	0.192941	0.783762	0.105816	0.0102819
CUTA	O60888	Protein CutA	19.4936	19.3856	20.3404	19.4386	19.6466	20.0474	19.6845	19.2566	20.2093	0.328752	0.641559	0.192763	0.109288	2.37067	0.0314312	1.50264	-0.660117	2.24323	0.0475109	1.32321	0.769405
CTSV	O60911	Cathepsin L2	14.1473	14.4441	14.1128	14.2021	14.3866	14.2241	14.2559	14.2134	14.1353	0.8965	0.278923	0.554516	-0.146271	0.407331	0.533017	0.273259	0.0443761	1.16104	0.192641	0.71525	-0.190647
HUS1	O60921	Checkpoint protein HUS1	16.5472	16.6613	16.8229	16.807	16.5676	16.6236	16.563	16.6814	16.7845	0.00812669	0.990374	0.00420084	0.00225258	0.430662	0.511306	0.29132	-0.10463	0.691311	0.386536	0.41281	0.106882
PFDN1	O60925	Prefoldin subunit 1	21.9295	21.6586	21.8259	21.9415	21.7035	21.7737	21.8676	21.7781	21.7618	2.05768	0.0542461	1.26563	0.19948	1.85097	0.0614572	1.21143	0.125722	0.855982	0.299442	0.523687	0.0737578
PPP1R11	O60927	Protein phosphatase 1 regulatory subunit 11	16.0902	16.276	16.1201	16.1276	16.2015	16.1379	16.2235	16.1008	16.0978	0.285914	0.684373	0.164707	-0.0456772	0.276382	0.656973	0.182452	0.0284793	0.642746	0.41449	0.382486	-0.0741564
NBN	O60934	Nibrin	19.6589	19.6573	19.614	19.5561	19.6438	19.7026	19.6807	19.573	19.671	0.0529961	0.935225	0.029084	0.00715001	0.263774	0.671261	0.173109	-0.0306244	0.440243	0.558366	0.253081	0.0377744
RNGTT	O60942	mRNA-capping enzyme;Polynucleotide 5-triphosphatase;mRNA guanylyltransferase	18.8246	18.9125	19.0698	18.8946	18.8661	19.0976	18.855	18.9163	19.0305	0.709192	0.364553	0.43824	-0.0402349	2.74907	0.0210644	1.67645	-0.207909	2.57025	0.0335257	1.47462	0.167674
ABCB7	O75027	ATP-binding cassette sub-family B member 7, mitochondrial	19.6871	19.6877	19.7351	19.8075	19.6273	19.696	19.6483	19.7419	19.7293	0.187871	0.783867	0.105758	0.0286382	0.0402159	0.941749	0.026065	-0.00585047	0.415866	0.576996	0.238828	0.0344887
SRGAP2	O75044	SLIT-ROBO Rho GTPase-activating protein 2	19.4439	19.3933	19.4702	19.476	19.4117	19.445	19.4057	19.3675	19.5044	0.995779	0.238879	0.621821	0.0509974	0.516395	0.448253	0.348477	-0.0313492	1.73305	0.089155	1.04985	0.0823466
NOS1AP	O75052	Carboxyl-terminal PDZ ligand of neuronal nitric oxide synthase protein	16.036	15.9854	16.0969	16.1445	15.9255	16.0651	16.1044	15.8467	16.1529	1.5784	0.103979	0.983056	0.17579	0.0870513	0.882461	0.0543043	-0.00999832	1.755	0.0862903	1.06404	0.185789
IGSF3	O75054	Immunoglobulin superfamily member 3	15.8913	15.7581	15.9628	15.8468	15.6941	15.8905	15.9485	15.6285	15.8034	1.87851	0.0680229	1.16734	0.201998	0.0633929	0.912153	0.0399322	0.00997098	1.49747	0.120206	0.920073	0.192027
DNAJC6	O75061	Putative tyrosine-protein phosphatase auxilin	15.6187	16.6562	15.7697	15.3942	16.9628	15.6662	15.7782	16.2624	16.0017	1.95018	0.0617378	1.20945	-1.03011	0.653477	0.358803	0.445144	-0.215464	1.64662	0.0988681	1.00494	-0.814647
FAM20B	O75063	Glycosaminoglycan xylosylkinase	16.9416	16.923	17.1147	17.0033	16.9293	17.1085	16.8812	17.0049	17.1099	0.0834672	0.900662	0.045438	-0.0103766	2.05879	0.0473926	1.32429	-0.169009	2.4138	0.0402168	1.39559	0.158632
WDR1	O75083	WD repeat-containing protein 1	21.9489	22.0456	22.0257	21.9985	21.9942	21.9926	21.9981	22.0051	22.0243	0.661022	0.392585	0.406067	-0.033165	0.754922	0.304292	0.516709	-0.0323893	0.0134769	0.983759	0.00711147	-0.000775655
FZD7	O75084	Frizzled-7;Frizzled-2	11.9153	11.8698	12.64	12.2125	12.2118	12.249	12.1509	12.1199	12.0886	0.065585	0.92228	0.035137	0.0257072	0.551069	0.424073	0.372559	-0.232964	0.599824	0.442371	0.354214	0.258671
N4BP1	O75113	NEDD4-binding protein 1	17.4328	17.5475	17.3223	17.3392	17.5651	17.4278	17.4294	17.4488	17.4833	1.18902	0.179494	0.745951	-0.120007	0.0662538	0.909328	0.0412794	-0.0106983	0.85374	0.300357	0.522362	-0.109309
ROCK2	O75116	Rho-associated protein kinase 2	21.294	21.143	21.2887	21.3003	21.1019	21.3264	21.3218	21.0936	21.3138	3.41928	0.0123108	1.90971	0.192537	0.110522	0.848966	0.0711095	-0.00424894	3.32109	0.0172135	1.76413	0.196786
CLASP2	O75122	CLIP-associating protein 2	20.6548	20.7491	20.7423	20.6628	20.7073	20.7757	20.6724	20.7419	20.7454	2.12649	0.0499998	1.30103	-0.0694415	2.82018	0.0198523	1.70219	-0.0911719	0.578081	0.455829	0.341198	0.0217304
PTCD1	O75127	Pentatricopeptide repeat-containing protein 1, mitochondrial	18.7195	18.7404	18.6609	18.7102	18.7369	18.7102	18.6993	18.7578	18.6929	1.81342	0.0743959	1.12845	-0.035354	0.624955	0.375594	0.425281	0.021656	1.64353	0.0993289	1.00292	-0.05701
ASTN2	O75129	Astrotactin-2	13.3935	13.4825	14.1932	13.1346	13.8605	13.9344	13.5867	14.1544	13.2779	0.918088	0.271265	0.566607	-0.460863	0.642582	0.364716	0.438045	-0.430254	0.0308025	0.963924	0.0159571	-0.0306098
CPNE3	O75131	Copine-3	22.2655	22.1832	22.4544	22.4277	22.1092	22.3521	22.2564	22.186	22.4264	1.20864	0.173804	0.759941	0.157055	0.67592	0.34513	0.462018	-0.0944583	2.50413	0.035701	1.44732	0.251513
DEPDC5	O75140	DEP domain-containing protein 5	12.0815	12.6444	11.6785	12.4325	12.2049	11.9125	11.9923	12.1439	12.4316	0.321386	0.648294	0.188228	-0.162312	0.245124	0.690309	0.160956	0.161226	0.521216	0.496492	0.304087	-0.323538
ATG13	O75143	Autophagy-related protein 13	18.4185	18.3584	18.1245	18.347	18.3256	18.318	18.4379	18.3092	18.1682	1.05565	0.218151	0.661242	0.0700366	1.4198	0.110912	0.955021	0.197561	0.99079	0.247426	0.606554	-0.127524
PPFIA3	O75145	Liprin-alpha-3	16.9867	16.6926	16.8073	16.8373	16.7203	16.934	16.9567	16.7375	16.7918	1.94127	0.0624848	1.20423	0.210138	0.572739	0.410484	0.386703	0.0825418	1.2756	0.163365	0.786842	0.127596
HIP1R	O75146	Huntingtin-interacting protein 1-related protein	18.583	18.3696	18.5466	18.5838	18.4028	18.537	18.5083	18.4968	18.4819	1.38538	0.135946	0.866633	0.135315	0.495649	0.461719	0.335622	0.0365219	1.0777	0.217121	0.663298	0.098793
OBSL1	O75147	Obscurin-like protein 1	15.3887	15.3701	15.4794	15.3347	15.547	15.4307	15.298	15.3167	15.5202	0.403166	0.575035	0.240305	-0.0708027	1.67768	0.0772815	1.11192	-0.136296	0.368989	0.617192	0.20958	0.0654936
RNF40	O75150	E3 ubiquitin-protein ligase BRE1B	20.6675	20.6052	20.6249	20.6473	20.6341	20.6135	20.6724	20.6034	20.5947	1.73186	0.0836858	1.07735	0.0482114	1.93215	0.0553564	1.25683	0.0513725	0.0843733	0.902765	0.0444255	-0.00316111
PHF2	O75151	Lysine-specific demethylase PHF2	16.3372	16.3004	16.1812	16.2191	16.3756	16.1318	16.2542	16.2991	16.114	0.563718	0.454505	0.342461	-0.0548496	1.46827	0.102599	0.988858	0.127844	2.31617	0.0441472	1.3551	-0.182693
ZC3H11A	O75152	Zinc finger CCCH domain-containing protein 11A	20.4669	20.5409	20.3074	20.3575	20.5509	20.3659	20.4166	20.4983	20.3759	1.51511	0.113058	0.9467	-0.116341	0.772445	0.295815	0.528979	0.0639496	2.59682	0.0329851	1.48168	-0.180291
CLUH	O75153	Clustered mitochondria protein homolog	21.8295	21.8347	21.7213	21.9378	21.7253	21.7309	21.844	21.8582	21.7008	0.533584	0.475697	0.32267	0.0643972	1.91678	0.0562654	1.24976	0.152786	0.988955	0.248136	0.60531	-0.0883891
CAND2	O75155	Cullin-associated NEDD8-dissociated protein 2	19.5237	19.3828	19.4494	19.5347	19.3252	19.4933	19.4447	19.4154	19.5058	1.51222	0.113414	0.945335	0.126626	0.213789	0.725671	0.139261	0.0182234	1.58395	0.107304	0.969382	0.108402
TSC22D2	O75157	TSC22 domain family protein 2	16.6447	16.5352	16.7531	16.7332	16.5728	16.5853	16.6595	16.518	16.7277	1.90419	0.0656906	1.1825	0.137151	0.0558687	0.920325	0.0360588	-0.00953674	1.25982	0.16745	0.776114	0.146688
KDM4A	O75164	Lysine-specific demethylase 4A	17.4055	17.5141	17.1793	17.3432	17.5143	17.2321	17.3581	17.4313	17.3025	1.6119	0.0985358	1.00641	-0.117636	1.50222	0.097327	1.01177	0.130937	2.276	0.0459945	1.33729	-0.248573
DNAJC13	O75165	DnaJ homolog subfamily C member 13	20.1639	20.3032	20.2708	20.193	20.2763	20.2572	20.1671	20.3062	20.2592	3.09377	0.0175793	1.755	-0.120549	3.00861	0.0171229	1.76642	-0.0877164	1.46173	0.125558	0.901157	-0.0328325
PPP6R2	O75170	Serine/threonine-protein phosphatase 6 regulatory subunit 2	18.4149	18.3635	18.2535	18.3753	18.2445	18.3447	18.343	18.3217	18.315	0.770045	0.334348	0.475801	0.0678641	1.01305	0.20508	0.688077	0.0733363	0.0423717	0.949779	0.0223777	-0.00547218
CNOT3	O75175	CCR4-NOT transcription complex subunit 3	19.5605	19.4946	19.4465	19.5489	19.4654	19.4566	19.5867	19.4179	19.4841	1.87793	0.0680253	1.16733	0.10605	2.53959	0.0253195	1.59654	0.102971	0.0418945	0.9501	0.0222309	0.0030791
ANKRD17	O75179	Ankyrin repeat domain-containing protein 17	20.5978	20.5578	20.5893	20.6137	20.5203	20.602	20.6122	20.5282	20.585	2.35669	0.0383367	1.41639	0.07245	1.02853	0.200057	0.698847	0.015775	1.9757	0.065289	1.18516	0.056675
SIN3B	O75182	Paired amphipathic helix protein Sin3b	16.3254	16.4426	16.3181	16.3418	16.3481	16.4192	16.4387	16.2761	16.404	0.0767894	0.909415	0.0412378	0.0130418	0.0886228	0.880928	0.0550597	-0.011795	0.162187	0.815794	0.0884193	0.0248369
DNAJB6	O75190	DnaJ homolog subfamily B member 6	19.6821	19.6558	19.5854	19.6472	19.6529	19.6186	19.6981	19.5949	19.6469	0.762004	0.337791	0.471352	0.0412445	1.18797	0.157703	0.80216	0.0588188	0.263284	0.717348	0.14427	-0.0175743
XYLB	O75191	Xylulose kinase	17.5962	18.0758	17.8097	17.5601	17.9976	17.9111	17.6002	17.9613	17.8817	3.52952	0.0109439	1.96083	-0.42608	3.00266	0.0171229	1.76642	-0.281989	1.47593	0.123618	0.907918	-0.144091
LRP5	O75197	Low-density lipoprotein receptor-related protein 5	14.9686	12.2323	14.3407	14.6877	12.1093	14.3939	14.6496	12.3584	14.3359	4.47592	0.0071904	2.14325	2.53531	1.80165	0.0657485	1.18211	0.411843	5.05026	0.00611547	2.21357	2.12346
COQ9	O75208	Ubiquinone biosynthesis protein COQ9, mitochondrial	18.3887	18.5038	18.626	18.4615	18.4463	18.5883	18.5566	18.2475	18.6725	0.310729	0.659234	0.18096	0.0697149	1.37477	0.118752	0.925358	-0.160023	1.32192	0.153828	0.812965	0.229738
GGCT	O75223	Gamma-glutamylcyclotransferase	21.1988	21.27	21.2786	21.2005	21.303	21.2564	21.2396	21.2007	21.2877	0.611247	0.422008	0.374679	-0.0449193	1.7061	0.0744616	1.12807	-0.0612494	0.199222	0.777166	0.109486	0.0163301
NDUFS7	O75251	NADH dehydrogenase [ubiquinone] iron-sulfur protein 7, mitochondrial	20.3668	20.3075	20.1658	20.3635	20.2522	20.1764	20.339	20.2321	20.2781	1.72776	0.083928	1.07609	0.0924581	1.81467	0.0646727	1.18928	0.149667	0.606178	0.438551	0.35798	-0.057209
RTN2	O75298	Reticulon-2	15.6494	15.4889	15.9353	15.6601	15.5919	15.8155	15.6555	15.483	15.9696	1.706	0.0862011	1.06449	0.133703	2.23915	0.037448	1.42657	-0.251838	2.55902	0.0339639	1.46898	0.385541
NDUFS2	O75306	NADH dehydrogenase [ubiquinone] iron-sulfur protein 2, mitochondrial	21.4608	21.4442	21.3627	21.5108	21.369	21.3842	21.4658	21.3662	21.4446	1.33813	0.144719	0.839474	0.0860246	1.31456	0.130221	0.88532	0.0819874	0.0387268	0.954411	0.0202646	0.00403722
ZPR1	O75312	Zinc finger protein ZPR1	20.3271	20.3867	20.2827	20.2828	20.3746	20.3564	20.345	20.3182	20.3478	0.672306	0.385341	0.414154	-0.0415319	0.1319	0.82128	0.0855088	-0.0106551	0.418898	0.573953	0.241124	-0.0308768
DUSP11	O75319	RNA/RNP complex-1-interacting phosphatase	17.1495	17.018	17.1365	17.1733	16.969	17.0788	17.0698	17.09	17.1297	1.05044	0.219712	0.658147	0.105209	0.16478	0.781751	0.106932	0.0158393	1.06105	0.222303	0.653055	0.0893695
GBAS	O75323	Protein NipSnap homolog 2	20.3678	20.2967	20.5742	20.4186	20.2612	20.5509	20.3748	20.366	20.4629	1.07358	0.213154	0.671307	0.079092	1.71938	0.0731161	1.13599	-0.1423	2.0744	0.0577292	1.2386	0.221392
HMMR	O75330	Hyaluronan mediated motility receptor	18.6122	19.0606	18.5537	18.4794	19.0721	18.6662	18.5499	18.9416	18.7129	2.96462	0.0197825	1.70372	-0.477594	0.730938	0.31561	0.500849	-0.0971025	2.42129	0.040122	1.39662	-0.380492
PDCD6	O75340	Programmed cell death protein 6	20.1369	20.3885	20.1486	20.1105	20.3986	20.1393	20.077	20.4383	20.1674	3.69907	0.00962119	2.01677	-0.300294	1.06944	0.18829	0.725172	-0.0436509	3.92	0.0119906	1.92116	-0.256643
TBCA	O75347	Tubulin-specific chaperone A	23.0175	22.9408	22.9517	22.9253	22.9777	22.9513	23.0039	22.9301	22.938	0.435526	0.547293	0.26178	0.032685	0.533634	0.436721	0.359796	0.0352236	0.0581491	0.930832	0.0311288	-0.00253868
ATP6V1G1	O75348	V-type proton ATPase subunit G 1	19.0429	18.9786	18.9499	18.9892	19.0107	18.9774	19.0234	18.9498	19.0083	0.755771	0.341175	0.467023	0.0387732	0.801905	0.281687	0.550233	0.0399507	0.0160147	0.980899	0.00837586	-0.00117747
VPS4B	O75351	Vacuolar protein sorting-associated protein 4B	19.2335	19.3147	19.3659	19.2688	19.2569	19.3892	19.3695	19.1854	19.4095	0.277959	0.690611	0.160767	0.0382455	1.07551	0.186143	0.730154	-0.0975927	1.58119	0.107524	0.968494	0.135838
MPDU1	O75352	Mannose-P-dolichol utilization defect 1 protein	18.8546	18.667	18.8902	19.0054	18.6242	18.7673	18.7762	18.8638	18.825	0.736554	0.350102	0.455805	0.16042	0.269787	0.663999	0.177832	0.0512625	0.596198	0.444868	0.351768	0.109158
ZNF217	O75362	Zinc finger protein 217	13.9435	13.94	13.5991	13.8027	13.939	13.6364	13.8511	13.7078	13.8482	0.0131942	0.983836	0.00707735	0.00349553	0.909257	0.239079	0.621458	0.171203	0.698381	0.383503	0.416232	-0.167707
H2AFY	O75367	Core histone macro-H2A.1	22.171	22.2339	22.1561	22.1773	22.2127	22.1865	22.2136	22.1671	22.1942	0.293625	0.676356	0.169825	-0.0172367	0.180819	0.763099	0.117419	0.0083847	0.487484	0.521227	0.282973	-0.0256214
SH3BGRL	O75368	SH3 domain-binding glutamic acid-rich-like protein	19.6042	19.8128	19.8457	19.6257	19.8213	19.8519	19.6313	19.7054	19.8895	1.85486	0.0700939	1.15432	-0.15947	3.95532	0.0075794	2.12037	-0.241995	0.973482	0.253514	0.595998	0.0825253
FLNB	O75369	Filamin-B	23.562	23.5709	23.6222	23.5157	23.5427	23.6862	23.6185	23.4373	23.6859	0.408658	0.569441	0.244551	0.0484753	1.27483	0.138204	0.85948	-0.0993544	1.49145	0.121234	0.916375	0.14783
NCOR1	O75376	Nuclear receptor corepressor 1	18.6435	18.5522	18.5752	18.62	18.5676	18.6502	18.6536	18.6221	18.5763	1.17157	0.183983	0.735223	0.0583611	0.650224	0.360607	0.442966	0.0384439	0.240685	0.74001	0.130762	0.0199172
VAMP4	O75379	Vesicle-associated membrane protein 4	14.4197	14.6933	14.6021	13.8304	14.5342	14.8793	14.8563	13.9224	14.8319	0.0126159	0.983959	0.00702314	-0.0144691	0.579591	0.40563	0.39187	-0.402296	0.707939	0.377188	0.423442	0.387827
NDUFS6	O75380	NADH dehydrogenase [ubiquinone] iron-sulfur protein 6, mitochondrial	20.3484	20.0641	20.0199	20.3473	20.1152	19.9229	20.3624	19.9071	20.0699	2.1729	0.0472433	1.32566	0.3239	2.88318	0.018503	1.73276	0.348458	0.117501	0.864035	0.0634688	-0.0245577
PEX14	O75381	Peroxisomal membrane protein PEX14	19.0195	18.9613	19.0772	19.0023	18.9752	19.0198	18.9408	19.0271	19.0897	0.00373631	0.995072	0.00214571	-0.000356038	1.09161	0.181432	0.741285	-0.0746746	1.18894	0.185978	0.730539	0.0743186
TRIM3	O75382	Tripartite motif-containing protein 3	13.1987	12.7028	13.0221	13.094	12.8603	13.131	13.0083	13.1793	12.9509	0.546889	0.465596	0.331991	0.186217	0.360119	0.577746	0.238263	0.065649	0.33208	0.648383	0.188169	0.120568
TULP3	O75386	Tubby-related protein 3	13.4553	13.4027	13.8015	13.48	13.4219	13.744	13.7065	13.255	13.6288	0.913944	0.272745	0.564243	0.18745	0.872349	0.252503	0.597734	-0.177485	2.12126	0.0543264	1.26499	0.364936
CS	O75390	Citrate synthase, mitochondrial	23.7147	23.5621	23.6989	23.7483	23.5553	23.6668	23.6659	23.645	23.6698	1.50833	0.113738	0.944093	0.122137	0.525961	0.442093	0.354486	0.0311025	1.38935	0.138768	0.857711	0.0910346
SPAG7	O75391	Sperm-associated antigen 7	18.7362	18.5595	18.63	18.6235	18.6219	18.6839	18.7363	18.5722	18.6211	1.2716	0.159021	0.798546	0.114152	0.562484	0.417053	0.379809	0.0537008	1.03873	0.23025	0.637801	0.0604515
MRPL33	O75394	39S ribosomal protein L33, mitochondrial	18.7611	18.7848	18.5998	18.6931	18.7707	18.6695	18.7493	18.7989	18.6234	1.05048	0.219712	0.658147	-0.0503038	1.6179	0.0838142	1.07668	0.103608	2.65768	0.0309043	1.50998	-0.153912
SEC22B	O75396	Vesicle-trafficking protein SEC22b	20.9168	21.1897	21.1983	20.9171	21.2193	21.1684	20.9139	21.2323	21.1359	4.71405	0.00686933	2.16309	-0.297848	3.81381	0.00844899	2.0732	-0.25161	0.985559	0.249187	0.603474	-0.0462379
PRPF40A	O75400	Pre-mRNA-processing factor 40 homolog A	21.9577	22.0115	21.9956	22.0054	21.9922	21.999	21.9796	21.9931	22.0099	0.523952	0.483163	0.315906	-0.0180308	0.64547	0.363587	0.439391	-0.0206114	0.123877	0.857588	0.0667213	0.00258064
TACC1	O75410	Transforming acidic coiled-coil-containing protein 1	18.0037	18.0946	17.9544	17.9706	18.1126	17.9358	17.9803	18.0263	18.013	1.52937	0.111026	0.954577	-0.09294	0.271713	0.661624	0.179389	0.017121	1.45666	0.126271	0.898698	-0.110061
NME6	O75414	Nucleoside diphosphate kinase 6	16.8747	16.8807	16.5979	16.8214	16.8535	16.6667	16.7983	16.9207	16.6586	0.830906	0.307664	0.511924	-0.0535253	2.42974	0.0291507	1.53535	0.190394	2.95058	0.0228998	1.64017	-0.243919
CDC45	O75419	Cell division control protein 45 homolog	18.987	19.1073	19.1167	19.0762	18.9983	19.1257	18.9885	19.0368	19.2083	0.280694	0.688292	0.162227	-0.0303008	1.48649	0.0998736	1.00055	-0.133032	1.11777	0.205408	0.687383	0.102732
GIGYF1	O75420	PERQ amino acid-rich with GYF domain-containing protein 1	14.3051	14.4481	14.2165	14.4826	14.2295	14.4044	14.5042	14.2349	14.2885	0.59053	0.435344	0.361167	0.126511	0.69576	0.333399	0.477035	0.127509	0.00360985	0.995456	0.001978	-0.000997861
LRCH4	O75427	Leucine-rich repeat and calponin homology domain-containing protein 4	15.7583	15.861	15.9877	15.8806	15.8897	15.9133	15.9057	15.9068	15.8867	0.325617	0.644342	0.190884	-0.0376132	0.672709	0.346972	0.459705	-0.0810312	0.585906	0.451304	0.345531	0.0434179
MTX2	O75431	Metaxin-2	18.5379	18.7786	18.9143	18.7446	18.8102	18.6864	18.6038	18.682	18.9668	0.823126	0.311037	0.507188	-0.128177	1.01038	0.205811	0.686531	-0.227057	0.451562	0.548391	0.26091	0.0988795
VPS26A	O75436	Vacuolar protein sorting-associated protein 26A	20.1857	20.4514	20.3794	20.3091	20.3469	20.3505	20.2016	20.4493	20.3563	1.61993	0.0972395	1.01216	-0.183734	1.51061	0.0962605	1.01655	-0.129891	0.688133	0.388063	0.411098	-0.0538432
NDUFB1	O75438	NADH dehydrogenase [ubiquinone] 1 beta subcomplex subunit 1	18.6843	18.5325	18.9553	18.888	18.5408	18.9193	18.813	18.7887	18.7377	0.781167	0.329703	0.481877	0.174426	0.349454	0.587516	0.23098	-0.0756404	1.09179	0.212916	0.671793	0.250067
PMPCB	O75439	Mitochondrial-processing peptidase subunit beta	21.4914	21.3906	21.5084	21.5275	21.3725	21.4907	21.5075	21.3885	21.5204	3.33243	0.0137068	1.86306	0.124909	0.0575924	0.918681	0.0368354	0.00225321	3.53708	0.0149864	1.8243	0.122656
SAP30	O75446	Histone deacetylase complex subunit SAP30	17.4899	17.6644	17.5929	17.6394	17.595	17.5119	17.6552	17.4675	17.64	0.0872517	0.895834	0.0477722	0.0191924	0.0717927	0.902314	0.0446424	0.0132446	0.0290904	0.965765	0.0151287	0.00594775
MED24	O75448	Mediator of RNA polymerase II transcription subunit 24	18.4117	18.5727	18.4081	18.3868	18.5071	18.4887	18.3407	18.677	18.4272	1.73257	0.0836858	1.07735	-0.205888	0.897392	0.243468	0.613559	-0.0615756	1.22951	0.174544	0.758096	-0.144313
KATNA1	O75449	Katanin p60 ATPase-containing subunit A1	19.2737	19.3623	19.2741	19.254	19.3276	19.3214	19.2039	19.3854	19.2241	1.89294	0.0666436	1.17624	-0.114526	0.348389	0.588103	0.230547	-0.0293268	1.22298	0.176528	0.753187	-0.0851994
E2F6	O75461	Transcription factor E2F6	15.814	15.6192	15.7567	15.7746	15.6893	15.7788	15.8652	15.6546	15.6126	2.10602	0.0509741	1.29265	0.163579	0.808052	0.278919	0.554522	0.101899	0.479158	0.526926	0.27825	0.0616805
PSIP1	O75475	PC4 and SFRS1-interacting protein	22.8627	22.8784	22.859	22.8159	22.9322	22.8386	22.8858	22.8024	22.8934	0.139816	0.835392	0.0781096	-0.0162137	0.124851	0.829974	0.0809353	-0.00888634	0.0621961	0.927704	0.0325908	-0.0073274
ERLIN1	O75477	Erlin-1	18.8715	18.8697	18.7245	18.9425	18.7486	18.7566	18.8382	18.8485	18.8113	0.567702	0.451626	0.345222	0.0618032	1.40214	0.113718	0.944169	0.119936	0.573315	0.459236	0.337964	-0.0581328
TADA2A	O75478	Transcriptional adapter 2-alpha	14.2675	14.5198	14.1799	14.3293	14.3548	14.2869	14.2	14.1553	14.4185	0.279523	0.689269	0.161611	-0.0777047	0.139075	0.813773	0.0894969	-0.0295057	0.14177	0.839123	0.0761744	-0.048199
SUPT3H	O75486	Transcription initiation protein SPT3 homolog	15.691	15.757	15.7999	15.7051	15.8647	15.7269	15.822	15.6051	15.8259	0.0111353	0.986195	0.0060371	-0.00290362	0.36775	0.570764	0.243544	-0.0448672	0.19961	0.776924	0.109622	0.0419636
GPC4	O75487	Glypican-4;Secreted glypican-4	19.3854	19.4371	19.5621	19.3941	19.4202	19.5546	19.4562	19.3505	19.5629	0.0960518	0.887016	0.0520683	0.00930532	2.56034	0.0248555	1.60458	-0.147981	2.38479	0.0413574	1.38345	0.157286
NDUFS3	O75489	NADH dehydrogenase [ubiquinone] iron-sulfur protein 3, mitochondrial	21.3826	21.3819	21.2927	21.4237	21.3513	21.3046	21.4012	21.2942	21.3856	0.994549	0.239423	0.620835	0.0600554	1.11806	0.173914	0.759666	0.074892	0.141337	0.839515	0.0759715	-0.0148366
SRSF10	O75494	Serine/arginine-rich splicing factor 10	21.6416	21.5886	21.4524	21.4807	21.6497	21.4739	21.6352	21.2645	21.6771	0.258831	0.710712	0.148306	0.0849075	0.226187	0.711799	0.147643	0.0513725	0.0853239	0.901698	0.0449387	0.033535
GMNN	O75496	Geminin	18.3484	18.3112	18.4543	18.3102	18.4768	18.3431	18.399	18.2558	18.4563	0.0213391	0.973964	0.0114571	0.00455538	0.651263	0.359903	0.443814	-0.0653814	0.386592	0.601548	0.22073	0.0699368
CLN5	O75503	Ceroid-lipofuscinosis neuronal protein 5	18.6097	18.7142	18.9306	18.7807	18.5604	18.9112	18.5953	18.8115	18.8531	0.130381	0.847451	0.0718853	-0.0334435	1.68025	0.0770256	1.11337	-0.236383	1.24249	0.171331	0.766163	0.20294
ECI2	O75521	Enoyl-CoA delta isomerase 2, mitochondrial	21.1563	20.8404	20.9458	21.0833	20.815	21.0441	21.1329	20.7552	21.0323	3.19222	0.0160861	1.79355	0.32063	1.4389	0.107372	0.969108	0.116774	2.15622	0.0521951	1.28237	0.203857
KHDRBS3	O75525	KH domain-containing, RNA-binding, signal transduction-associated protein 3	17.3355	17.1363	17.4732	17.211	17.2765	17.4493	17.2317	17.3536	17.3577	0.0177197	0.977468	0.00989754	0.00396538	1.48555	0.0999611	1.00017	-0.167304	1.10818	0.207557	0.682863	0.171269
TADA3	O75528	Transcriptional adapter 3	16.0585	16.1609	16.2335	16.0023	16.1998	16.3487	16.1774	16.1826	16.139	0.898101	0.278326	0.555446	-0.10173	0.946163	0.226283	0.645349	-0.16103	0.408195	0.582783	0.234493	0.0593007
TAF5L	O75529	TAF5-like RNA polymerase II p300/CBP-associated factor-associated factor 65 kDa subunit 5L	17.2106	17.3703	17.3881	17.2285	17.4478	17.3269	17.2508	17.4136	17.3207	2.6916	0.0260807	1.58368	-0.180581	2.03616	0.048652	1.3129	-0.115285	0.984786	0.249449	0.603018	-0.0652962
EED	O75530	Polycomb protein EED	19.8681	20.0403	20.0104	19.9818	19.9833	19.9611	19.8945	20.0231	19.9947	1.23599	0.166553	0.778447	-0.100761	0.925541	0.233096	0.632466	-0.0739034	0.530933	0.490048	0.309762	-0.0268574
BANF1	O75531	Barrier-to-autointegration factor;Barrier-to-autointegration factor, N-terminally processed	19.8689	19.6721	19.9993	19.9868	19.6257	19.9242	19.7983	19.6771	20.044	1.77246	0.0788554	1.10317	0.22635	0.735413	0.313555	0.503686	-0.104525	2.99378	0.0223366	1.65098	0.330875
SF3B1	O75533	Splicing factor 3B subunit 1	23.6641	23.771	23.7297	23.7116	23.7488	23.7023	23.6771	23.697	23.8009	0.981428	0.244169	0.61231	-0.0546621	0.8551	0.259614	0.585671	-0.0600211	0.0502135	0.940258	0.0267528	0.00535901
CSDE1	O75534	Cold shock domain-containing protein E1	22.9787	22.916	23.0107	23.07	22.8788	22.9396	23.0395	22.8251	23.01	1.84445	0.0710557	1.1484	0.156113	0.524821	0.442978	0.353618	0.0426401	1.48491	0.12204	0.913496	0.113473
WBP4	O75554	WW domain-binding protein 4	17.9976	17.9197	17.6768	17.8846	17.9544	17.7647	18.0017	17.7845	17.831	0.510135	0.491361	0.308599	0.0751069	1.58874	0.0866231	1.06237	0.203818	0.875641	0.290387	0.537022	-0.128711
PRKRA	O75569	Interferon-inducible double-stranded RNA-dependent protein kinase activator A	19.4354	19.6234	19.5914	19.4579	19.5685	19.6305	19.5067	19.5517	19.5949	1.71642	0.0850802	1.07017	-0.114506	2.32268	0.0331024	1.48014	-0.138904	0.415502	0.577329	0.238576	0.0243982
CRCP	O75575	DNA-directed RNA polymerase III subunit RPC9	16.4383	16.5387	16.3488	16.4818	16.5913	16.248	16.4443	16.5915	16.2799	2.23116	0.0440116	1.35643	-0.118982	2.11585	0.0438551	1.35798	0.162614	2.90827	0.0240018	1.61976	-0.281597
LRP6	O75581	Low-density lipoprotein receptor-related protein 6	12.1015	12.1461	11.9758	12.1535	11.9921	11.9089	12.123	12.131	11.792	0.285283	0.684652	0.16453	0.0362765	1.86021	0.060721	1.21666	0.233767	1.27389	0.163819	0.785635	-0.19749
RPS6KA5	O75582	Ribosomal protein S6 kinase alpha-5	17.4434	17.272	17.1783	17.4327	17.1707	17.1799	17.2932	17.3349	17.0834	0.89504	0.279352	0.553848	0.130575	1.85804	0.0608528	1.21572	0.242568	0.909405	0.27757	0.556628	-0.111993
MED6	O75586	Mediator of RNA polymerase II transcription subunit 6	17.1467	16.8977	17.0401	17.1224	16.9118	17.1521	17.178	16.8659	17.1149	3.58953	0.010765	1.96799	0.257238	0.565888	0.414751	0.382213	0.0466754	2.38704	0.0413041	1.38401	0.210563
MYCBP2	O75592	E3 ubiquitin-protein ligase MYCBP2	20.6745	20.7154	20.7119	20.6983	20.6652	20.7365	20.6505	20.7396	20.71	0.552634	0.46204	0.335321	-0.0323149	1.30136	0.132934	0.876363	-0.0450478	0.209648	0.767134	0.115129	0.0127328
GCAT	O75600	2-amino-3-ketobutyrate coenzyme A ligase, mitochondrial	18.2452	18.2103	18.1723	18.2176	18.1981	18.2329	18.2768	18.1809	18.2507	1.23176	0.167412	0.776212	0.0501181	0.404571	0.535492	0.271247	0.0279115	0.368327	0.617971	0.209032	0.0222066
NPM3	O75607	Nucleoplasmin-3	19.4721	19.1778	19.4122	19.3942	19.2436	19.2963	19.7193	18.5976	19.7005	1.07922	0.211572	0.674541	0.522191	0.140615	0.812267	0.0903011	0.0588932	0.909152	0.27757	0.556628	0.463298
LYPLA1	O75608	Acyl-protein thioesterase 1	20.4615	20.5784	20.7291	20.5358	20.5118	20.7031	20.4693	20.7137	20.5746	0.81446	0.315154	0.501477	-0.112419	1.55573	0.0905747	1.04299	-0.180069	0.371674	0.61426	0.211648	0.0676498
ERAL1	O75616	GTPase Era, mitochondrial	19.9501	20.0788	19.9712	19.8428	20.0827	20.0234	19.8439	20.0646	20.0808	2.26048	0.0427912	1.36865	-0.196443	1.42796	0.109296	0.961395	-0.146205	0.714338	0.374021	0.427104	-0.0502383
SNRNP200	O75643	U5 small nuclear ribonucleoprotein 200 kDa helicase	24.3282	24.4853	24.4973	24.4191	24.4297	24.4716	24.3625	24.4621	24.5051	1.34239	0.143945	0.841804	-0.0891018	1.88985	0.0582662	1.23458	-0.121387	0.780999	0.337418	0.471832	0.0322857
TRMU	O75648	Mitochondrial tRNA-specific 2-thiouridylase 1	17.3446	17.0499	17.2073	17.2564	17.1234	17.2148	17.2255	17.1922	17.1272	1.32186	0.147753	0.830462	0.153667	0.953376	0.224345	0.649083	0.0924269	0.544219	0.480053	0.31871	0.0612399
TIPRL	O75663	TIP41-like protein	20.9227	21.0437	21.1447	20.9463	21.0499	21.1131	20.9263	21.1027	21.0733	2.57432	0.0297225	1.52692	-0.133677	2.90794	0.0180379	1.74381	-0.178598	0.738684	0.360684	0.442874	0.0449219
TOM1L1	O75674	TOM1-like protein 1	17.1826	17.2128	17.2073	17.3166	17.1233	17.2186	17.2557	17.204	17.1982	0.676484	0.382605	0.417249	0.0716197	0.483868	0.471064	0.32692	0.0436039	0.408844	0.582783	0.234493	0.0280158
SURF6	O75683	Surfeit locus protein 6	20.3692	20.3379	20.2792	20.289	20.3888	20.2939	20.3814	20.2354	20.3563	0.183461	0.788667	0.103106	0.0258045	0.418016	0.523268	0.281275	0.036698	0.075157	0.913272	0.0394	-0.0108935
PPM1B	O75688	Protein phosphatase 1B	18.994	19.0489	19.086	19.0268	19.0107	19.0855	19.0563	18.9706	19.0841	0.209627	0.760649	0.118816	0.0156237	1.52714	0.0937346	1.0281	-0.059501	1.53379	0.114441	0.941417	0.0751247
UTP20	O75691	Small subunit processome component 20 homolog	21.5404	21.6375	21.5566	21.6038	21.5671	21.576	21.5013	21.6824	21.5503	0.830639	0.307763	0.511784	-0.0804685	0.150906	0.799302	0.0972891	-0.0124772	0.922201	0.272932	0.563946	-0.0679913
NUP155	O75694	Nuclear pore complex protein Nup155	21.5583	21.6135	21.7329	21.6894	21.5527	21.6557	21.5388	21.6534	21.7089	0.0693307	0.917746	0.0372776	-0.0110283	0.922752	0.233804	0.631148	-0.103655	1.17288	0.190071	0.721085	0.0926272
RP2	O75695	Protein XRP2	18.1155	18.416	18.4029	18.2239	18.2939	18.3995	18.1137	18.4195	18.4196	1.82647	0.0731393	1.13585	-0.225412	2.64452	0.0231157	1.63609	-0.256289	0.300623	0.678924	0.168179	0.0308774
WDHD1	O75717	WD repeat and HMG-box DNA-binding protein 1	21.7178	21.7791	21.7275	21.7551	21.7183	21.7757	21.7326	21.7546	21.7557	0.304813	0.665936	0.176567	-0.0155036	0.431025	0.510977	0.291599	-0.0178305	0.0349511	0.958806	0.0182694	0.00232697
CRTAP	O75718	Cartilage-associated protein	19.8332	19.6577	19.8682	19.8772	19.6174	19.8928	19.7479	19.7478	19.8446	1.25918	0.161738	0.791188	0.145116	0.53581	0.435084	0.361427	-0.0491219	2.04394	0.0599591	1.22214	0.194237
SLC25A12	O75746	Calcium-binding mitochondrial carrier protein Aralar1	19.575	19.473	19.6864	19.5609	19.4824	19.679	19.4723	19.6176	19.6394	0.0729332	0.913622	0.0392334	0.0117931	1.69764	0.0753209	1.12308	-0.132168	1.37339	0.142208	0.847076	0.143962
PALM	O75781	Paralemmin-1	15.9776	15.7483	15.8609	15.7266	15.9721	15.9145	16.0301	15.6741	15.9476	0.364934	0.608324	0.215865	0.113236	0.0126995	0.981812	0.00797187	0.00372855	0.516274	0.500184	0.300871	0.109508
ATP6AP2	O75787	Renin receptor	19.462	19.3027	19.6196	19.5527	19.3378	19.5134	19.5353	19.243	19.5999	2.31924	0.0400891	1.39697	0.222206	0.642159	0.364968	0.437745	-0.0609417	2.56883	0.0335257	1.47462	0.283148
RNASEH2A	O75792	Ribonuclease H2 subunit A	20.6071	20.7706	20.7711	20.5521	20.794	20.7745	20.6263	20.7519	20.7582	2.65445	0.0271975	1.56547	-0.176987	2.79058	0.0202799	1.69293	-0.172816	0.115123	0.866983	0.0619895	-0.00417074
CDC123	O75794	Cell division cycle protein 123 homolog	19.4895	19.5178	19.659	19.6	19.4492	19.6017	19.4961	19.6297	19.5499	0.0193754	0.975571	0.010741	-0.0037028	0.719488	0.321008	0.493484	-0.0749963	0.509207	0.50453	0.297113	0.0712935
POP7	O75817	Ribonuclease P protein subunit p20	18.8916	18.7977	18.7054	18.8131	18.8323	18.7794	18.8754	18.7573	18.7871	0.930065	0.265901	0.57528	0.0642605	1.35706	0.121904	0.913984	0.102737	0.495361	0.514756	0.288399	-0.0384763
RPP40	O75818	Ribonuclease P protein subunit p40	17.6481	17.7706	17.9546	17.7649	17.7472	17.9185	17.5954	17.9775	17.8571	0.850114	0.298464	0.525107	-0.16228	1.85475	0.0611866	1.21334	-0.24058	0.425924	0.569385	0.244594	0.0782998
EIF3G	O75821	Eukaryotic translation initiation factor 3 subunit G	21.5625	21.572	21.6333	21.4734	21.6469	21.6401	21.6348	21.415	21.7053	0.0508875	0.937498	0.0280298	0.0122541	0.922411	0.233804	0.631148	-0.102674	0.730365	0.365173	0.437501	0.114928
EIF3J	O75822	Eukaryotic translation initiation factor 3 subunit J	21.4999	21.5865	21.5075	21.4583	21.605	21.4865	21.5547	21.4563	21.5839	0.341862	0.62987	0.200749	-0.0449956	0.206151	0.735416	0.133467	-0.0216783	0.157914	0.820716	0.0858071	-0.0233173
CBR3	O75828	Carbonyl reductase [NADPH] 3	18.6065	18.8098	18.8233	18.6576	18.7294	18.7916	18.6262	18.8745	18.6912	1.76313	0.0800504	1.09664	-0.174488	1.50852	0.0964996	1.01547	-0.138636	0.244971	0.73603	0.133105	-0.0358524
PSMD10	O75832	26S proteasome non-ATPase regulatory subunit 10	20.3261	20.5379	20.6245	20.3522	20.5369	20.634	20.5141	20.3004	20.7118	0.244336	0.723646	0.140474	-0.0609105	1.78939	0.0665079	1.17713	-0.25929	1.1145	0.206175	0.685765	0.19838
AP1G2	O75843	AP-1 complex subunit gamma-like 2	17.8368	17.9092	18.0207	17.9321	17.8768	17.9704	17.7826	18.0895	17.9097	0.610972	0.422071	0.374615	-0.108003	1.00748	0.206822	0.684403	-0.116428	0.038908	0.954153	0.0203821	0.00842476
ZMPSTE24	O75844	CAAX prenyl protease 1 homolog	21.0183	21.1961	21.2455	21.069	21.1486	21.2348	21.0987	21.0257	21.3446	0.476942	0.515575	0.287708	-0.0614478	2.14335	0.0422874	1.37379	-0.212971	1.15625	0.193864	0.712502	0.151524
IDH1	O75874	Isocitrate dehydrogenase [NADP] cytoplasmic	22.0638	22.2937	22.1574	22.0856	22.2721	22.1414	22.0789	22.2065	22.2115	2.59192	0.0292606	1.53372	-0.181357	1.8769	0.0595157	1.22537	-0.0940024	1.21705	0.177806	0.750053	-0.0873547
GATB	O75879	Glutamyl-tRNA(Gln) amidotransferase subunit B, mitochondrial	18.7028	18.6358	18.7235	18.6829	18.5662	18.7582	18.6321	18.7203	18.6889	0.257308	0.712058	0.147485	0.031868	0.81032	0.277956	0.556024	-0.0508944	0.781589	0.337249	0.472049	0.0827624
SCO1	O75880	Protein SCO1 homolog, mitochondrial	19.3397	19.2525	19.5181	19.5061	19.2801	19.351	19.3403	19.4081	19.3805	0.48562	0.509261	0.29306	0.0817585	0.100491	0.864412	0.0632792	-0.0211703	0.6629	0.402285	0.395466	0.102929
ATRN	O75882	Attractin	14.7519	14.3451	14.4781	14.7241	14.2196	14.6451	14.5472	14.2741	14.6888	2.2323	0.0439423	1.35712	0.39478	0.317745	0.617631	0.209271	0.0703958	1.93133	0.0690165	1.16105	0.324385
RBBP9	O75884	Putative hydrolase RBBP9	19.2963	19.4436	19.13	19.3791	19.429	19.0844	19.4156	19.1682	19.3093	0.0602444	0.928575	0.0321831	0.0167122	1.15214	0.165244	0.781873	0.189082	0.696638	0.38421	0.415432	-0.17237
STAM2	O75886	Signal transducing adapter molecule 2	18.4016	18.3358	18.2724	18.4554	18.2993	18.2616	18.4265	18.3188	18.2654	2.36974	0.0379787	1.42046	0.109827	3.27825	0.013797	1.86021	0.161295	2.02272	0.0614716	1.21133	-0.0514679
ALDH1L1	O75891	Cytosolic 10-formyltetrahydrofolate dehydrogenase	17.1532	17.2686	17.1669	16.9153	17.3545	17.3015	17.0282	17.326	17.2248	1.74892	0.0816913	1.08782	-0.2841	1.18329	0.158674	0.799494	-0.198803	0.853358	0.300447	0.522232	-0.0852973
TUSC2	O75896	Tumor suppressor candidate 2	17.5321	17.439	17.4851	17.4594	17.3894	17.5805	17.4256	17.4784	17.5633	0.380371	0.594709	0.225696	0.0367928	0.754	0.304747	0.516061	-0.0705776	1.28905	0.160949	0.793312	0.10737
CCNK	O75909	Cyclin-K	18.7921	18.949	18.9093	18.8615	18.8572	18.9158	18.7586	18.9535	18.903	1.24694	0.163926	0.785352	-0.115852	1.58357	0.0872688	1.05914	-0.105289	0.122083	0.859904	0.0655501	-0.0105623
DHRS3	O75911	Short-chain dehydrogenase/reductase 3	16.4564	15.8712	15.954	16.3621	15.6485	16.2613	16.6484	15.8589	15.7265	2.48163	0.0331384	1.47967	0.69609	1.34761	0.123908	0.9069	0.508375	0.476329	0.529188	0.27639	0.187715
ARL6IP5	O75915	PRA1 family protein 3	19.4176	19.5297	19.5793	19.5732	19.5323	19.4736	19.4577	19.5348	19.5335	0.457376	0.529776	0.275908	-0.0494582	0.341	0.595326	0.225245	-0.0459906	0.038386	0.95502	0.0199876	-0.00346756
PIAS1	O75925	E3 SUMO-protein ligase PIAS1	17.2835	17.2494	17.3066	17.3435	17.2234	17.2609	17.3235	17.2333	17.3157	1.87868	0.0680229	1.16734	0.0814412	0.385247	0.554452	0.256136	0.0223974	1.47383	0.12396	0.90672	0.0590439
PIAS2	O75928	E3 SUMO-protein ligase PIAS2	15.0561	15.2055	15.1313	15.1748	15.2262	15.0036	15.03	15.3267	15.114	1.33342	0.145154	0.838171	-0.165837	0.0221768	0.969298	0.0135425	0.00397905	1.44078	0.128982	0.889471	-0.169816
BCAS2	O75934	Pre-mRNA-splicing factor SPF27	21.3233	21.4032	21.2893	21.3009	21.3938	21.3082	21.3736	21.2389	21.3892	0.0779019	0.908059	0.0418861	-0.0127036	0.0335182	0.951547	0.0215698	0.00371424	0.0955456	0.890823	0.0502086	-0.0164178
DCTN3	O75935	Dynactin subunit 3	19.9128	20.0773	20.3012	20.1234	20.0012	20.1386	19.9141	20.1692	20.165	0.509726	0.491611	0.308379	-0.0991243	1.1892	0.157491	0.802745	-0.218121	0.78461	0.335875	0.473823	0.118996
DNAJC8	O75937	DnaJ homolog subfamily C member 8	22.4979	22.524	22.4847	22.4706	22.5256	22.5188	22.5339	22.4489	22.51	0.0141643	0.982135	0.00782861	0.00133705	0.0606115	0.915845	0.0381779	-0.0036672	0.0637651	0.925948	0.0334136	0.00500425
SMNDC1	O75940	Survival of motor neuron-related-splicing factor 30	19.9932	20.2348	20.1268	19.9765	20.2369	20.136	20.1326	19.9893	20.1784	0.551595	0.462717	0.334685	-0.119532	1.02006	0.202898	0.692722	-0.112968	0.0262875	0.96865	0.0138333	-0.00656446
RAD17	O75943	Cell cycle checkpoint protein RAD17	15.8832	16.0324	15.86	15.8518	15.9892	16.0288	15.746	16.1216	15.8996	1.74723	0.0818665	1.08689	-0.220764	0.712368	0.32421	0.489174	-0.102507	0.856472	0.299285	0.523915	-0.118256
ATP5H	O75947	ATP synthase subunit d, mitochondrial	22.5933	22.4872	22.5088	22.5453	22.4771	22.5865	22.5484	22.4699	22.5733	2.17844	0.0470169	1.32775	0.0842902	0.0755326	0.898072	0.0466889	0.0061423	1.47663	0.123484	0.90839	0.0781479
DNAJB5	O75953	DnaJ homolog subfamily B member 5	14.4785	14.5602	14.6088	14.5045	14.3815	14.768	14.5703	14.6016	14.4907	0.0153096	0.980668	0.00847792	0.00336552	0.54534	0.428071	0.368485	-0.104686	0.442027	0.557161	0.254019	0.108052
TSPAN9	O75954	Tetraspanin-9	12.7339	11.9704	12.7898	12.665	12.4892	12.5141	12.9281	11.9623	12.4858	1.53196	0.110671	0.955968	0.634991	0.64774	0.362101	0.44117	0.179063	1.07451	0.217847	0.661848	0.455928
FLOT1	O75955	Flotillin-1	19.6893	19.849	19.7567	19.7451	19.8251	19.7394	19.804	19.6505	19.8638	0.151483	0.821926	0.0851673	-0.028752	0.32571	0.610939	0.214002	-0.0405013	0.0549994	0.934949	0.029212	0.0117493
TRIO	O75962	Triple functional domain protein	17.1572	17.1462	17.2119	17.1088	17.1684	17.2403	17.122	17.2471	17.1925	0.790025	0.32627	0.486423	-0.0579046	1.88762	0.0584919	1.2329	-0.0855261	0.339877	0.642254	0.192293	0.0276216
ATP5L	O75964	ATP synthase subunit g, mitochondrial	20.9897	20.9778	21.2561	21.1612	20.9849	21.0988	20.9688	21.2182	21.049	0.0714835	0.91487	0.0386407	-0.0203597	0.470102	0.481473	0.317428	-0.0946859	0.299989	0.679508	0.167805	0.0743262
MPDZ	O75970	Multiple PDZ domain protein	17.4467	17.2606	17.2497	17.4095	17.1758	17.1877	17.3979	17.1332	17.2055	2.32187	0.0400642	1.39724	0.228197	3.00522	0.0171229	1.76642	0.203762	0.229457	0.748672	0.125708	0.024435
CPD	O75976	Carboxypeptidase D	19.9169	20.1467	19.9263	19.8769	20.1646	19.9092	19.8914	20.0964	19.9705	3.28937	0.0143761	1.84236	-0.240841	0.864009	0.256111	0.591572	-0.0402762	2.73229	0.0292094	1.53448	-0.200565
GLRX3	O76003	Glutaredoxin-3	23.013	23.1596	23.1478	23.0515	23.1606	23.111	23.0338	23.0542	23.2085	1.16982	0.184444	0.734135	-0.0920238	1.80287	0.0657485	1.18211	-0.123032	0.274654	0.704974	0.151827	0.0310084
RSL1D1	O76021	Ribosomal L1 domain-containing protein 1	23.0069	23.0793	23.1271	23.0542	23.1082	23.072	23.0713	23.0706	23.0918	0.873273	0.287991	0.540622	-0.0419426	0.986879	0.213074	0.671469	-0.0528558	0.215005	0.762756	0.117614	0.0109132
WFS1	O76024	Wolframin	17.9664	18.027	17.9159	17.9715	17.9733	17.9793	17.9439	17.9594	18.0153	0.509173	0.491932	0.308095	-0.0259291	0.114368	0.844211	0.0735491	-0.00953865	0.174241	0.804184	0.0946444	-0.0163905
CLPX	O76031	ATP-dependent Clp protease ATP-binding subunit clpX-like, mitochondrial	21.136	20.9627	20.9914	21.0944	20.9462	21.0386	21.0645	21.0122	21.006	1.9118	0.0650743	1.18659	0.12462	1.58431	0.0871773	1.0596	0.086291	0.723259	0.36921	0.432726	0.0383294
NEBL	O76041	Nebulette	14.0545	13.602	14.0307	14.0219	14.0937	13.646	14.0634	13.7327	14.0579	0.736663	0.350102	0.455805	0.237157	0.432831	0.509844	0.292562	0.135074	0.19806	0.778158	0.108932	0.102083
SEC14L2	O76054	SEC14-like protein 2	16.4683	16.3607	16.4562	16.4507	16.3842	16.4848	16.4773	16.4054	16.4374	2.25322	0.0433029	1.36348	0.0819836	0.139129	0.813773	0.0894969	0.00595983	1.80089	0.0811011	1.09097	0.0760237
SNCG	O76070	Gamma-synuclein	14.3188	14.6548	14.3367	14.4465	14.5522	14.3853	14.4196	14.2593	14.6566	0.306413	0.664203	0.177699	-0.0937945	0.237784	0.698144	0.156055	-0.0645425	0.0658675	0.923835	0.0344056	-0.0292521
CIAO1	O76071	Probable cytosolic iron-sulfur protein assembly protein CIAO1	19.3538	19.4199	19.4481	19.473	19.2867	19.487	19.3982	19.3752	19.4862	0.383386	0.592378	0.227401	0.0477327	0.816706	0.27526	0.560257	-0.0653928	1.28709	0.161336	0.792268	0.113125
PDE5A	O76074	cGMP-specific 3,5-cyclic phosphodiesterase	14.4958	14.5801	14.3054	14.5766	14.3888	14.142	14.3183	14.398	14.5333	0.0269939	0.967208	0.0144802	0.00792313	0.42715	0.514659	0.288481	0.136684	0.424635	0.569919	0.244187	-0.128761
DFFB	O76075	DNA fragmentation factor subunit beta	16.4374	16.4359	16.411	16.4066	16.4025	16.5251	16.3774	16.47	16.3909	0.484228	0.510214	0.292248	-0.0290362	0.318869	0.616825	0.209838	-0.0352058	0.0457661	0.946198	0.024018	0.00616964
ZFAND5	O76080	AN1-type zinc finger protein 5	16.3582	16.1547	16.0078	16.4428	15.9886	16.0547	16.4444	15.9583	16.0485	2.31853	0.0400891	1.39697	0.38125	3.53013	0.010955	1.96039	0.37815	0.0163785	0.980541	0.00853434	0.0031004
SLC22A5	O76082	Solute carrier family 22 member 5	13.4448	13.492	13.3682	13.3802	13.5807	13.3285	13.1164	13.6505	13.3055	1.10971	0.201906	0.69485	-0.260605	0.0692594	0.906371	0.0426938	-0.0202344	2.08431	0.0570867	1.24347	-0.240371
SRP72	O76094	Signal recognition particle subunit SRP72	22.0085	22.0427	22.0447	22.042	22.0208	22.0231	22.0093	22.0546	22.0599	0.586733	0.438123	0.358404	-0.0194829	0.669273	0.348608	0.457663	-0.0226377	0.0762373	0.912793	0.0396279	0.00315475
DXO	O77932	Decapping and exoribonuclease protein	13.9575	13.8781	14.222	14.2	13.9704	14.0896	14.2479	13.6794	14.2285	1.10669	0.202804	0.692923	0.292502	0.168416	0.777864	0.109097	-0.0448996	1.59462	0.106051	0.974487	0.337402
DDAH1	O94760	N(G),N(G)-dimethylarginine dimethylaminohydrolase 1	19.335	19.6516	19.6184	19.3508	19.6171	19.6124	19.3974	19.5543	19.6493	2.71192	0.0256473	1.59096	-0.246605	3.57298	0.0106804	1.97141	-0.265639	0.245036	0.73603	0.133105	0.0190341
RECQL4	O94761	ATP-dependent DNA helicase Q4	17.4001	17.3211	17.1337	17.3114	17.3116	17.1697	17.3763	17.3086	17.1478	0.846545	0.300302	0.522441	0.0488129	2.75957	0.0208075	1.68178	0.212189	3.89921	0.0119906	1.92116	-0.163376
RECQL5	O94762	ATP-dependent DNA helicase Q5	17.1581	17.2792	17.2811	17.2031	17.3261	17.2426	17.1088	17.3068	17.2546	2.07459	0.0533365	1.27298	-0.147373	1.5959	0.0859682	1.06566	-0.102789	1.17999	0.18811	0.725588	-0.0445843
URI1	O94763	Unconventional prefoldin RPB5 interactor 1	18.9	18.9448	18.7547	18.8935	18.9327	18.7789	18.92	18.9083	18.7955	0.83672	0.305093	0.515568	-0.024114	3.06623	0.0165775	1.78048	0.128146	3.16696	0.0189336	1.72277	-0.15226
B3GAT3	O94766	Galactosylgalactosylxylosylprotein 3-beta-glucuronosyltransferase 3	16.5322	16.4519	16.6168	16.4862	16.4721	16.6755	16.5299	16.4487	16.64	1.60822	0.0990376	1.0042	0.0585486	2.31242	0.0335006	1.47495	-0.127993	3.25886	0.0179141	1.74681	0.186542
MTA2	O94776	Metastasis-associated protein MTA2	22.1569	22.1252	22.0236	22.1466	22.1218	22.0284	22.1245	22.1442	22.0385	0.44617	0.538449	0.268855	0.0122833	3.3636	0.0122916	1.91039	0.112524	3.58051	0.0143726	1.84246	-0.100241
USP1	O94782	Ubiquitin carboxyl-terminal hydrolase 1	16.5252	16.3953	16.3943	16.4527	16.4892	16.3328	16.5068	16.3582	16.4369	0.838409	0.304267	0.516745	0.0806522	1.343	0.124745	0.903977	0.106926	0.20588	0.77072	0.113103	-0.0262737
ALDH1A2	O94788	Retinal dehydrogenase 2	20.2814	20.0225	20.2441	20.3539	19.9624	20.2383	20.282	20.07	20.2218	2.72942	0.0253483	1.59605	0.287472	1.33156	0.126949	0.896371	0.0710564	2.61224	0.0322965	1.49084	0.216415
STK10	O94804	Serine/threonine-protein kinase 10	18.7601	18.6219	18.7013	18.7637	18.6033	18.6733	18.7892	18.5627	18.7055	3.04915	0.0182706	1.73825	0.175048	2.32818	0.0329153	1.4826	0.0776653	2.06934	0.0579378	1.23704	0.0973829
PRKD3	O94806	Serine/threonine-protein kinase D3	16.2959	16.121	15.8644	16.1797	15.9593	16.1199	16.2812	16.1073	15.9112	1.39595	0.133809	0.873514	0.189715	1.52998	0.0933309	1.02997	0.287077	0.444814	0.554474	0.256119	-0.0973622
GFPT2	O94808	Glutamine--fructose-6-phosphate aminotransferase [isomerizing] 2	17.307	17.3196	17.6257	17.4742	17.2657	17.5178	17.3641	17.3818	17.5412	0.426941	0.554343	0.256222	0.0593898	1.41877	0.11104	0.954522	-0.179768	2.15618	0.0521951	1.28237	0.239158
TPPP	O94811	Tubulin polymerization-promoting protein	12.8277	12.0178	12.4593	12.6415	12.1302	12.6745	12.4413	12.2199	12.7743	1.82217	0.0736046	1.13309	0.514245	0.00185804	0.996862	0.00136496	0.000826518	2.02345	0.0614229	1.21167	0.513418
SLIT2	O94813	Slit homolog 2 protein;Slit homolog 2 protein N-product;Slit homolog 2 protein C-product	20.1954	20.3959	20.3431	20.2531	20.4183	20.3163	20.1909	20.3474	20.3919	2.4134	0.0360279	1.44336	-0.174082	1.99923	0.0507406	1.29464	-0.137339	0.531585	0.489526	0.310225	-0.0367438
ATG12	O94817	Ubiquitin-like protein ATG12	15.9467	15.7834	15.9922	15.9161	15.8407	16.0147	15.8039	15.689	15.8127	0.886462	0.282478	0.549015	0.117889	0.263227	0.671729	0.172806	-0.0509599	1.01982	0.237164	0.624952	0.168849
KBTBD11	O94819	Kelch repeat and BTB domain-containing protein 11	14.031	14.2178	13.7663	13.9515	14.2118	13.8997	13.8928	14.0153	14.0352	1.14999	0.189571	0.722229	-0.189877	0.265478	0.669329	0.174361	0.058047	1.1405	0.199006	0.701134	-0.247924
LTN1	O94822	E3 ubiquitin-protein ligase listerin	18.2924	18.349	18.2897	18.3707	18.2414	18.3297	18.3071	18.2419	18.3947	0.460557	0.528164	0.277231	0.045955	0.139159	0.813773	0.0894969	-0.0146294	0.572807	0.459318	0.337887	0.0605844
TOMM70A	O94826	Mitochondrial import receptor subunit TOM70	22.1499	22.248	22.293	22.2103	22.2062	22.274	22.1721	22.2442	22.2681	1.17811	0.182353	0.739087	-0.0553958	2.20563	0.0391415	1.40736	-0.100919	1.38624	0.139298	0.856056	0.0455233
IPO13	O94829	Importin-13	15.8779	15.9749	16.1016	15.9477	16.0687	15.9423	15.881	16.0516	16.06	1.61431	0.0981584	1.00807	-0.129578	1.17807	0.15957	0.797049	-0.132443	0.01706	0.979802	0.00886146	0.00286484
DDHD2	O94830	Phospholipase DDHD2	17.5179	17.9966	17.7843	17.4754	18.1744	17.6222	17.5994	17.8641	17.8109	2.11216	0.050557	1.29622	-0.480822	1.40097	0.113912	0.943431	-0.208277	1.19147	0.18528	0.732171	-0.272545
MYO1D	O94832	Unconventional myosin-Id	20.1116	20.1844	20.297	20.2082	20.146	20.2331	20.124	20.2069	20.2787	0.37151	0.603093	0.219616	-0.0311883	1.56428	0.0895478	1.04794	-0.121667	1.59521	0.106002	0.974687	0.0904783
TOX4	O94842	TOX high mobility group box family member 4	19.4318	19.4659	19.3883	19.3985	19.459	19.4018	19.4295	19.4558	19.4165	1.64853	0.093371	1.02979	-0.0402762	0.586862	0.39994	0.398005	0.0177244	2.58477	0.0331851	1.47906	-0.0580006
KIAA0754	O94854	Uncharacterized protein KIAA0754	14.7333	14.9184	14.6131	14.7463	14.8922	14.6451	14.6183	14.9196	14.7269	2.14366	0.0488004	1.31158	-0.210763	0.286318	0.646717	0.189286	0.0375668	2.67926	0.0304575	1.51631	-0.24833
SEC24D	O94855	Protein transport protein Sec24D	19.8421	19.9761	19.9263	19.916	19.88	19.9641	19.8372	19.982	19.9265	0.904735	0.276158	0.558842	-0.0809371	1.22069	0.149498	0.825366	-0.0738424	0.0702004	0.918431	0.0369536	-0.0070947
SUPT7L	O94864	STAGA complex 65 subunit gamma	16.452	16.3132	16.3195	16.2783	16.3836	16.4107	16.3994	16.2968	16.3885	0.321155	0.648515	0.18808	0.0453548	0.020742	0.970974	0.0127923	0.00362841	0.473121	0.531807	0.274246	0.0417264
FCHSD2	O94868	F-BAR and double SH3 domains protein 2	13.4563	13.2896	13.6844	13.7111	13.2666	13.6123	13.6482	13.5611	13.3065	0.891543	0.280736	0.551702	0.232779	0.195839	0.745773	0.127393	0.0708059	0.468909	0.535117	0.271551	0.161973
UFL1	O94874	E3 UFM1-protein ligase 1	21.1748	21.2861	21.3351	21.2386	21.2409	21.331	21.1734	21.3465	21.3123	1.20146	0.176005	0.754474	-0.0955531	2.35076	0.0320338	1.49439	-0.130555	0.485338	0.522632	0.281804	0.0350018
PHF14	O94880	PHD finger protein 14	18.7049	18.5017	18.5436	18.6686	18.5015	18.5734	18.6752	18.5121	18.5763	3.96121	0.00847828	2.07169	0.177776	2.82404	0.019786	1.70364	0.118473	2.23832	0.0477724	1.32082	0.0593033
SASH1	O94885	SAM and SH3 domain-containing protein 1	13.8587	13.6475	12.9909	13.156	13.4299	13.3412	13.7578	12.7693	13.581	0.377253	0.597673	0.223536	0.308584	0.441754	0.502993	0.298438	0.286442	0.0235146	0.971647	0.0124913	0.0221418
FARP2	O94887	FERM, RhoGEF and pleckstrin domain-containing protein 2	18.0025	18.0658	18.0492	18.056	18.0292	18.016	17.9836	17.9944	18.0938	0.203292	0.768238	0.114504	-0.0157623	0.551609	0.423636	0.373007	-0.0389748	0.310227	0.669774	0.174072	0.0232124
UBXN7	O94888	UBX domain-containing protein 7	17.5433	17.647	17.5084	17.5023	17.6011	17.5633	17.528	17.6353	17.5403	2.31709	0.0401279	1.39655	-0.103247	0.25521	0.6798	0.167619	-0.012792	1.89722	0.0712596	1.14716	-0.0904554
KLHL18	O94889	Kelch-like protein 18	14.2216	14.3497	13.8377	14.2395	14.2384	13.9678	14.0193	14.2911	14.0141	0.791434	0.325674	0.487217	-0.132979	1.17431	0.160189	0.795366	0.220208	2.33352	0.0435312	1.3612	-0.353188
LRIG2	O94898	Leucine-rich repeats and immunoglobulin-like domains protein 2	14.7714	15.0782	15.1309	14.9642	14.8303	15.1901	14.9425	15.044	14.9759	0.391056	0.585072	0.232791	-0.0914507	1.09855	0.179484	0.745974	-0.206273	0.499327	0.511689	0.290994	0.114822
SUN1	O94901	SUN domain-containing protein 1	19.3873	19.4512	19.352	19.3359	19.48	19.4058	19.4021	19.3227	19.4835	0.338482	0.632085	0.199224	-0.0428664	0.37587	0.562988	0.249501	-0.0386302	0.0229788	0.972095	0.0122915	-0.00423622
PROSC	O94903	Proline synthase co-transcribed bacterial homolog protein	20.5646	20.5971	20.5596	20.5055	20.6339	20.614	20.6198	20.4591	20.681	0.000310916	0.999425	0.000249847	-5.97636e-05	0.496844	0.461106	0.336199	-0.0548693	0.358036	0.627374	0.202473	0.0548096
ERLIN2	O94905	Erlin-2	21.5726	21.5557	21.7575	21.5875	21.5687	21.7428	21.5685	21.6262	21.69	0.119618	0.858875	0.06607	-0.00735855	2.71187	0.0216729	1.66408	-0.153893	2.09881	0.0558394	1.25306	0.146535
PRPF6	O94906	Pre-mRNA-processing factor 6	22.4207	22.4628	22.4283	22.4044	22.4642	22.4526	22.4423	22.4518	22.4235	1.47736	0.119349	0.92318	-0.0371106	0.363056	0.57557	0.239902	-0.0123386	1.18632	0.186287	0.729817	-0.024772
PCF11	O94913	Pre-mRNA cleavage complex 2 protein Pcf11	19.4716	19.335	19.3923	19.3609	19.3261	19.5127	19.4578	19.2922	19.4331	1.40653	0.132059	0.879232	0.112293	0.117037	0.840839	0.0752871	-0.0159658	1.56609	0.109904	0.958987	0.128259
FRYL	O94915	Protein furry homolog-like	18.2408	18.345	18.2763	18.3064	18.2235	18.327	18.2149	18.3918	18.26	0.5063	0.493835	0.306418	-0.0660439	0.424849	0.516993	0.286516	-0.0337493	0.234713	0.745484	0.127562	-0.0322946
NFAT5	O94916	Nuclear factor of activated T-cells 5	14.7743	14.4	14.8475	14.7182	14.4538	14.8032	14.5511	14.6303	14.7727	0.900557	0.277788	0.556286	0.186493	0.832963	0.268907	0.570398	-0.126592	1.89721	0.0712596	1.14716	0.313085
ENDOD1	O94919	Endonuclease domain-containing 1 protein	17.5457	17.547	17.5105	17.556	17.4925	17.599	17.5362	17.4742	17.5983	0.850241	0.298464	0.525107	0.041392	0.319064	0.616772	0.209876	-0.0233173	0.817868	0.318066	0.497483	0.0647093
GLCE	O94923	D-glucuronyl C5-epimerase	16.5577	16.6421	16.826	16.6695	16.6521	16.7046	16.5006	16.7896	16.7245	0.79774	0.322441	0.49155	-0.118679	1.32237	0.128682	0.890483	-0.175779	0.398317	0.590676	0.22865	0.0570997
GLS	O94925	Glutaminase kidney isoform, mitochondrial	20.9861	21.0613	21.0508	21.0155	21.0428	21.062	21.037	21.0036	21.1166	0.438385	0.544274	0.264183	-0.0230223	1.19044	0.157097	0.803832	-0.0635878	0.697925	0.3837	0.416009	0.0405655
HAUS5	O94927	HAUS augmin-like complex subunit 5	18.1237	18.3437	18.181	18.2368	18.2414	18.1281	18.1467	18.289	18.2186	1.26261	0.161232	0.792548	-0.122306	0.0542289	0.922739	0.0349214	-0.00682449	1.36375	0.144498	0.840139	-0.115482
FBXO21	O94952	F-box only protein 21	15.4171	15.7507	15.8009	15.4321	15.6069	15.8508	15.3231	15.8332	15.7271	1.98666	0.0592329	1.22744	-0.33953	2.90247	0.0181316	1.74156	-0.402207	0.345101	0.638147	0.195079	0.0626774
KDM4B	O94953	Lysine-specific demethylase 4B	15.6125	15.6172	15.7147	15.641	15.6968	15.6321	15.5932	15.7271	15.5846	0.845324	0.300698	0.52187	-0.0648019	0.280269	0.652689	0.185293	-0.0281938	0.295571	0.684337	0.16473	-0.0366081
SOGA1	O94964	Protein SOGA1;N-terminal form;C-terminal 80 kDa form	13.0353	14.3086	15.1149	13.2058	14.4022	14.7526	13.6189	14.5074	14.2345	2.4458	0.0345253	1.46186	-1.11941	1.99239	0.0511861	1.29085	-1.41405	0.490226	0.518882	0.284932	0.29464
USP19	O94966	Ubiquitin carboxyl-terminal hydrolase 19	19.0429	19.1248	19.0455	19.1186	19.049	19.0536	19.0561	19.0797	19.07	0.137784	0.83784	0.0768387	-0.0119654	0.264017	0.671001	0.173277	0.0161616	0.535337	0.486568	0.312856	-0.028127
WDR47	O94967	WD repeat-containing protein 47	18.0457	18.3985	18.1424	18.1027	18.3101	18.1435	18.0137	18.458	18.0995	2.57982	0.029663	1.52778	-0.334829	1.17548	0.159866	0.796244	-0.0744311	2.34166	0.0431293	1.36523	-0.260398
TRIM37	O94972	E3 ubiquitin-protein ligase TRIM37	12.3429	12.2904	12.2001	12.6087	12.3232	12.0906	12.4958	12.0734	12.4285	1.0842	0.210211	0.677345	0.253445	0.899425	0.24274	0.614858	0.242723	0.0284318	0.966388	0.0148483	0.0107212
AP2A2	O94973	AP-2 complex subunit alpha-2	20.4781	20.8584	20.783	20.5221	20.7616	20.8114	20.4744	20.8546	20.7833	3.1607	0.016699	1.77731	-0.333354	4.1269	0.00656728	2.18261	-0.301019	0.417017	0.575834	0.239703	-0.0323346
SEC31A	O94979	Protein transport protein Sec31A	21.8498	21.9553	21.8811	21.9246	21.8953	21.871	21.8548	21.939	21.9005	0.824803	0.310381	0.508105	-0.0534897	0.110451	0.848975	0.0711049	-0.00782394	1.07886	0.216699	0.664144	-0.0456657
CLSTN1	O94985	Calsyntenin-1;Soluble Alc-alpha;CTF1-alpha	13.51	12.7031	13.6174	13.7825	12.9349	13.2032	13.2597	13.1906	13.4069	1.30403	0.151469	0.819677	0.574526	0.218915	0.7201	0.142607	0.108243	1.18665	0.186287	0.729817	0.466283
SLITRK5	O94991	SLIT and NTRK-like protein 5	16.3836	16.2503	16.1529	16.4138	16.2351	16.0986	16.3771	16.1639	16.2055	2.42524	0.0353369	1.45177	0.175105	2.72316	0.0216309	1.66493	0.239188	0.719269	0.371546	0.429988	-0.0640831
HEXIM1	O94992	Protein HEXIM1	19.98	20.0977	19.9195	19.9041	20.0949	19.993	20.0817	19.907	20.0163	0.212557	0.757381	0.120686	-0.0445989	0.0731485	0.90085	0.0453477	0.0123367	0.338504	0.643149	0.191688	-0.0569356
DIRAS1	O95057	GTP-binding protein Di-Ras1	13.0724	12.6251	13.4489	13.1509	12.9549	13.2044	12.8009	13.4039	13.2137	0.0178971	0.977356	0.00994735	0.0134315	0.991759	0.211566	0.674555	-0.280933	0.543137	0.48084	0.317999	0.294365
RPP14	O95059	Ribonuclease P protein subunit p14	15.8593	16.2709	16.1266	16.0633	16.1475	16.044	15.8788	16.2833	16.1346	1.73453	0.0834254	1.0787	-0.300158	1.11017	0.176084	0.754281	-0.167991	1.19194	0.185227	0.732296	-0.132167
CCNB2	O95067	G2/mitotic-specific cyclin-B2	17.5686	17.6529	17.5936	17.5658	17.6687	17.6063	17.5946	17.6399	17.5934	2.47878	0.0332656	1.478	-0.0775019	0.994096	0.210783	0.676165	-0.0214195	2.40927	0.0403956	1.39367	-0.0560824
YIF1A	O95070	Protein YIF1A	15.6563	15.7445	15.5897	15.7231	15.515	15.8505	15.5241	15.7974	15.7956	0.186883	0.784764	0.105261	-0.0511417	0.489305	0.466994	0.330688	-0.110776	0.194809	0.781815	0.106896	0.0596339
UBR5	O95071	E3 ubiquitin-protein ligase UBR5	21.4309	21.4804	21.4724	21.4826	21.4045	21.5068	21.3929	21.5111	21.4739	0.295388	0.674509	0.171012	-0.0298564	0.797775	0.283667	0.547191	-0.0488981	0.220953	0.757352	0.120702	0.0190417
AGFG2	O95081	Arf-GAP domain and FG repeat-containing protein 2	15.0215	14.9416	14.8597	14.8508	15.0728	14.6856	15.1042	14.8419	14.9089	0.148947	0.824866	0.0836164	0.0400642	0.798214	0.283451	0.547522	0.174067	0.634627	0.419732	0.377027	-0.134003
PRSS23	O95084	Serine protease 23	12.5857	13.6139	13.0407	13.0141	13.474	12.7068	13.239	13.1972	12.642	0.994123	0.239578	0.620554	-0.482079	0.261973	0.672768	0.172135	0.149801	1.65547	0.0979069	1.00919	-0.631879
SCAF4	O95104	Splicing factor, arginine/serine-rich 15	19.15	19.1835	19.0126	19.111	19.2274	19.0448	19.134	18.9947	19.194	0.0160756	0.97978	0.00887156	-0.00350316	0.34849	0.588103	0.230547	0.0478795	0.22106	0.757299	0.120733	-0.0513827
NDUFB6	O95139	NADH dehydrogenase [ubiquinone] 1 beta subcomplex subunit 6	20.0176	19.7593	19.8383	19.9177	19.7528	19.9426	20.0191	19.6758	19.9209	2.397	0.0367379	1.43489	0.25545	0.846236	0.263141	0.579812	0.0842113	1.83496	0.0771506	1.11266	0.171239
MFN2	O95140	Mitofusin-2	18.2722	18.1804	18.1122	18.3359	18.13	18.0956	18.2343	18.2272	18.0718	1.17004	0.184421	0.73419	0.1016	2.38009	0.0308766	1.51037	0.187614	1.32355	0.153467	0.813986	-0.0860138
DUSP14	O95147	Dual specificity protein phosphatase 14	13.8538	13.6829	13.8713	13.6422	13.8902	13.8386	13.9015	13.8046	13.6837	0.0221185	0.973455	0.0116843	0.00661532	0.00437293	0.993894	0.00265973	0.00131543	0.0211715	0.97392	0.0114768	0.00529989
SNUPN	O95149	Snurportin-1	16.5352	16.506	16.5119	16.675	16.4759	16.4906	16.5492	16.5005	16.4963	0.951724	0.256897	0.590241	0.0923347	0.902856	0.241408	0.617248	0.0868918	0.184554	0.793326	0.100548	0.00544294
UBE4B	O95155	Ubiquitin conjugation factor E4 B	19.0076	18.944	18.8655	19.0231	18.8784	18.9222	18.9815	18.8923	18.9785	1.8802	0.0679071	1.16808	0.0992018	1.10788	0.176621	0.752958	0.0819988	0.169972	0.809257	0.0919137	0.017203
ZFPL1	O95159	Zinc finger protein-like 1	17.077	17.2098	17.1386	17.2276	17.0664	17.109	17.1246	17.1237	17.1651	0.0552718	0.932574	0.0303169	0.00975863	0.0392026	0.943126	0.0254301	0.0054601	0.032451	0.961952	0.0168467	0.00429853
IKBKAP	O95163	Elongator complex protein 1	21.5451	21.6571	21.6107	21.6362	21.6024	21.5817	21.541	21.7227	21.5964	0.864073	0.291974	0.534655	-0.0866273	0.276365	0.656973	0.182452	-0.0221551	0.83666	0.309049	0.509972	-0.0644722
UBL3	O95164	Ubiquitin-like protein 3	13.0495	12.5426	12.2555	12.8318	12.3754	12.5417	12.8018	12.6944	12.314	1.37977	0.136576	0.864625	0.356912	1.95716	0.0536144	1.27072	0.523981	0.587659	0.450146	0.346647	-0.167069
NDUFA3	O95167	NADH dehydrogenase [ubiquinone] 1 alpha subcomplex subunit 3	15.3539	15.1878	16.2171	15.2292	15.2732	16.0161	15.2516	15.9089	15.6591	0.316519	0.65298	0.1851	-0.178397	1.82526	0.0639505	1.19416	-0.685894	0.841424	0.306868	0.513049	0.507497
NDUFB4	O95168	NADH dehydrogenase [ubiquinone] 1 beta subcomplex subunit 4	19.876	19.6614	19.6521	19.8594	19.6012	19.7206	19.8419	19.7044	19.637	2.52735	0.0314714	1.50208	0.203426	2.62954	0.0232333	1.63389	0.18921	0.132577	0.849158	0.0710116	0.0142167
NDUFB8	O95169	NADH dehydrogenase [ubiquinone] 1 beta subcomplex subunit 8, mitochondrial	19.3318	19.1091	19.03	19.2988	19.0561	19.0684	19.2919	19.1054	19.0545	3.30219	0.0142338	1.84668	0.21729	3.98276	0.00732668	2.13509	0.256519	0.89514	0.282794	0.54853	-0.0392291
NDUFB2	O95178	NADH dehydrogenase [ubiquinone] 1 beta subcomplex subunit 2, mitochondrial	16.9426	16.5067	16.6787	16.9004	16.5849	16.6146	16.9007	16.4756	16.724	3.42288	0.0123104	1.90973	0.392224	2.65515	0.0228702	1.64073	0.242144	1.52543	0.115654	0.936839	0.15008
NDUFA7	O95182	NADH dehydrogenase [ubiquinone] 1 alpha subcomplex subunit 7	17.2153	17.0115	17.1485	17.3412	17.1026	16.9917	17.2725	17.1347	16.9904	1.69374	0.087643	1.05728	0.19339	1.66044	0.0791073	1.10178	0.232826	0.242583	0.738404	0.131706	-0.0394357
RTN3	O95197	Reticulon-3	19.2983	19.3657	19.5235	19.4449	19.2666	19.4667	19.4654	19.0673	19.6368	0.763055	0.337437	0.471807	0.169688	0.895815	0.244131	0.612377	-0.139479	1.42466	0.132102	0.87909	0.309167
LETM1	O95202	LETM1 and EF-hand domain-containing protein 1, mitochondrial	21.9975	22.0088	21.8262	21.9159	22.0268	21.8481	21.9936	21.906	21.8869	0.0890315	0.893822	0.0487488	-0.0115274	1.64608	0.0806931	1.09316	0.115298	1.41991	0.132963	0.87627	-0.126825
EPN2	O95208	Epsin-2	17.4959	17.3092	17.4764	17.4669	17.3263	17.5137	17.5415	17.2658	17.4533	2.68806	0.0261738	1.58213	0.200984	0.293417	0.639945	0.193858	0.0202554	2.70038	0.0303595	1.51771	0.180729
ZRANB2	O95218	Zinc finger Ran-binding domain-containing protein 2	20.6062	20.5537	20.5897	20.5781	20.5479	20.6201	20.5783	20.5268	20.5657	1.64649	0.0936557	1.02847	0.0447311	0.0835681	0.886454	0.0523436	-0.00431697	1.29639	0.159247	0.79793	0.0490481
SNX4	O95219	Sorting nexin-4	18.5679	18.5071	18.6278	18.6088	18.4337	18.6328	18.5516	18.5577	18.5713	0.896757	0.278843	0.55464	0.0765877	0.59212	0.396245	0.402036	-0.0345345	1.26976	0.164861	0.782883	0.111122
ZWINT	O95229	ZW10 interactor	18.0852	18.1691	17.9652	18.0947	18.1544	17.9953	18.0335	18.1661	18.0289	2.03598	0.0555655	1.25519	-0.092062	1.3226	0.128682	0.890483	0.0747134	3.03828	0.0210374	1.67701	-0.166775
LUC7L3	O95232	Luc7-like protein 3	20.6838	20.8899	20.8546	20.7078	20.9729	20.7716	20.7251	20.962	20.7713	2.92708	0.0205177	1.68787	-0.236034	1.44186	0.106953	0.970805	-0.0935936	1.69944	0.0927627	1.03263	-0.142441
KIF20A	O95235	Kinesin-like protein KIF20A	18.5647	18.6618	18.64	18.5453	18.6444	18.6438	18.5753	18.6836	18.5702	2.67686	0.0263969	1.57845	-0.101501	1.03536	0.197944	0.703457	-0.0562096	0.789739	0.333034	0.477512	-0.0452913
KIF4A	O95239	Chromosome-associated kinesin KIF4A	20.7268	20.8689	20.7389	20.7264	20.8814	20.7428	20.756	20.871	20.7304	3.70146	0.00962119	2.01677	-0.137321	0.0304306	0.955987	0.0195479	-0.000944138	4.86418	0.00680076	2.16744	-0.136377
MBD4	O95243	Methyl-CpG-binding domain protein 4	15.1905	15.1815	14.9242	14.9826	15.2426	15.0594	15.0486	15.2467	15.0268	1.08492	0.210032	0.677714	-0.149692	0.405319	0.534775	0.271829	0.0703866	2.06244	0.0583843	1.2337	-0.220078
SBF1	O95248	Myotubularin-related protein 5	19.3981	19.3066	19.1425	19.3947	19.2068	19.238	19.3744	19.2446	19.2253	1.98017	0.0596388	1.22447	0.136393	2.42808	0.0291663	1.53512	0.187137	0.535992	0.486176	0.313206	-0.0507444
GOSR1	O95249	Golgi SNAP receptor complex member 1	17.7283	18.0224	17.9577	17.7296	18.0099	17.9477	17.7527	17.9739	17.9669	4.04872	0.00847828	2.07169	-0.26518	4.65911	0.00569057	2.24484	-0.220557	1.34033	0.149322	0.825876	-0.0446231
KAT7	O95251	Histone acetyltransferase KAT7	18.3752	18.5459	18.4249	18.4744	18.5818	18.3322	18.4586	18.5028	18.4464	1.31317	0.149596	0.82508	-0.107449	0.304965	0.629272	0.201162	0.0349236	1.56626	0.109904	0.958987	-0.142373
SLC25A14	O95258	Brain mitochondrial carrier protein 1	12.6161	13.2328	13.1448	13.0351	13.2581	12.7604	12.9708	13.1041	13.0121	1.09927	0.20503	0.688184	-0.324336	0.223069	0.715405	0.145448	-0.0984332	0.858093	0.298578	0.524942	-0.225903
ATE1	O95260	Arginyl-tRNA--protein transferase 1	18.239	18.2483	18.0098	18.0821	18.2789	18.1126	18.2327	18.0074	18.2074	0.0215314	0.973813	0.0115244	0.0064551	0.414271	0.526989	0.278199	0.0747204	0.264352	0.716151	0.144996	-0.0682653
CCNDBP1	O95273	Cyclin-D1-binding protein 1	13.5972	13.5453	13.1826	13.7708	13.4782	13.333	13.7031	13.4669	13.4016	1.58312	0.103527	0.984946	0.193551	2.02689	0.0493357	1.30684	0.384635	1.2953	0.159574	0.797039	-0.191084
VAPB	O95292	Vesicle-associated membrane protein-associated protein B/C	21.3293	21.3778	21.4083	21.2264	21.3824	21.4661	21.4225	21.2288	21.4497	0.0156858	0.980099	0.00873001	-0.00358963	0.909033	0.239083	0.621451	-0.115279	0.981616	0.250406	0.601355	0.111689
SNAPIN	O95295	SNARE-associated protein Snapin	17.0073	17.0648	17.0392	17.0086	17.1078	17.1535	17.1346	16.9459	17.0437	0.0574576	0.930783	0.0311515	0.0106761	0.194872	0.746206	0.127141	-0.0286242	0.255327	0.725548	0.139334	0.0393003
MPZL1	O95297	Myelin protein zero-like protein 1	18.2068	18.1724	18.3634	18.1239	18.2237	18.3496	18.142	18.2551	18.2643	0.788305	0.327057	0.485376	-0.0595144	1.86754	0.0603186	1.21955	-0.16821	1.29725	0.159074	0.798401	0.108696
NDUFC2	O95298	NADH dehydrogenase [ubiquinone] 1 subunit C2;NADH dehydrogenase [ubiquinone] 1 subunit C2, isoform 2	20.4239	20.3033	20.43	20.5131	20.3275	20.3386	20.3834	20.2644	20.3604	1.53825	0.109644	0.960015	0.141738	0.605661	0.387798	0.411394	0.0637747	1.10634	0.208204	0.681512	0.0779629
NDUFA10	O95299	NADH dehydrogenase [ubiquinone] 1 alpha subcomplex subunit 10, mitochondrial	20.9164	20.7598	20.8373	20.91	20.7685	20.8377	20.9309	20.7357	20.8757	3.84491	0.00891615	2.04982	0.164412	2.08349	0.0460243	1.33701	0.0688591	2.3966	0.0410586	1.3866	0.0955524
FKBP9	O95302	Peptidyl-prolyl cis-trans isomerase FKBP9	16.1247	16.3759	16.5575	16.1476	16.3458	16.6098	16.2107	16.3477	16.5685	2.68493	0.0262718	1.58051	-0.195478	3.79829	0.00844899	2.0732	-0.417618	3.54594	0.0148768	1.82749	0.222141
PGLS	O95336	6-phosphogluconolactonase	21.3308	21.2304	21.2658	21.2559	21.2805	21.3088	21.2945	21.3091	21.2404	0.256748	0.712579	0.147167	0.02038	0.305092	0.629239	0.201184	0.0220439	0.0181586	0.978449	0.00946189	-0.00166384
PAPSS2	O95340	Bifunctional 3-phosphoadenosine 5-phosphosulfate synthase 2;Sulfate adenylyltransferase;Adenylyl-sulfate kinase	18.6908	18.6714	18.7911	18.7776	18.6133	18.7794	18.7493	18.6013	18.8011	1.52511	0.111662	0.952096	0.110578	0.910962	0.238436	0.622629	-0.0513287	2.70234	0.030317	1.51831	0.161907
SMC2	O95347	Structural maintenance of chromosomes protein 2	23.4439	23.4312	23.4243	23.422	23.4239	23.4641	23.4541	23.4044	23.4436	0.746303	0.345304	0.461799	0.0201391	0.0962669	0.87002	0.0604707	-0.00401052	0.796331	0.329585	0.482033	0.0241496
ATG7	O95352	Ubiquitin-like modifier-activating enzyme ATG7	19.1907	19.3448	19.2795	19.295	19.2722	19.2751	19.2185	19.2919	19.3418	0.83309	0.30639	0.513726	-0.0682265	0.77931	0.292473	0.533915	-0.0640685	0.046548	0.945702	0.0242459	-0.00415802
FARS2	O95363	Phenylalanine--tRNA ligase, mitochondrial	16.5574	16.6415	16.4643	16.4589	16.7068	16.4641	16.5031	16.683	16.4751	2.11888	0.0503936	1.29762	-0.170611	0.603816	0.389192	0.409836	0.0386753	3.37588	0.0166967	1.77737	-0.209286
ZBTB7A	O95365	Zinc finger and BTB domain-containing protein 7A	14.0375	13.6954	13.3814	14.1046	13.4588	13.5931	13.98	13.5563	13.6365	2.4289	0.0350872	1.45485	0.470517	2.36042	0.0316482	1.49965	0.503683	0.115257	0.866983	0.0619895	-0.0331669
LYPLA2	O95372	Acyl-protein thioesterase 2	19.1949	19.5571	19.8045	19.1598	19.6461	19.7136	19.2178	19.7708	19.5712	2.7217	0.0254692	1.59398	-0.46723	2.71165	0.0216729	1.66408	-0.505644	0.156469	0.822087	0.0850821	0.038414
IPO7	O95373	Importin-7	22.335	22.4262	22.4748	22.4989	22.3383	22.4279	22.3667	22.4129	22.4693	0.0464938	0.940391	0.0266916	0.007768	0.473518	0.479419	0.319285	-0.0571499	0.978228	0.251716	0.599089	0.0649179
ARIH2	O95376	E3 ubiquitin-protein ligase ARIH2	19.1646	19.2643	19.1992	19.1806	19.2583	19.1947	19.1847	19.1273	19.2726	0.370859	0.603261	0.219495	-0.0399698	0.810439	0.27795	0.556033	-0.0455373	0.0367426	0.956756	0.0191987	0.00556755
SLU7	O95391	Pre-mRNA-splicing factor SLU7	18.7435	18.6824	18.616	18.6718	18.7094	18.6992	18.7575	18.6599	18.6513	0.59862	0.430132	0.366398	0.0403652	0.893857	0.244546	0.611639	0.0687834	0.433994	0.563197	0.24934	-0.0284182
PGM3	O95394	Phosphoacetylglucosamine mutase	21.1447	21.1898	21.2086	21.142	21.2055	21.1787	21.1967	21.1094	21.2329	0.0716856	0.914722	0.038711	-0.00709661	0.896177	0.244009	0.612594	-0.0456104	0.500156	0.511468	0.291182	0.0385138
MOCS3	O95396	Adenylyltransferase and sulfurtransferase MOCS3;Molybdopterin-synthase adenylyltransferase;Molybdopterin-synthase sulfurtransferase	18.4872	18.4732	18.3563	18.4049	18.5002	18.389	18.3954	18.5494	18.4138	1.00194	0.236722	0.625761	-0.0784435	0.565761	0.414751	0.382213	0.0427653	1.91604	0.0702675	1.15325	-0.121209
UTS2	O95399	Urotensin-2	18.782	18.5945	18.7757	18.6825	18.746	18.7631	18.6777	18.5861	18.8356	0.506448	0.493835	0.306418	0.0718498	0.886632	0.246815	0.607628	-0.0774104	1.23919	0.172058	0.764326	0.14926
CD2BP2	O95400	CD2 antigen cytoplasmic tail-binding protein 2	20.8401	20.8429	20.7026	20.7803	20.8558	20.7604	20.8531	20.8081	20.7248	0.15601	0.817267	0.0876363	-0.0110633	1.56331	0.0896305	1.04754	0.095211	2.06908	0.0579378	1.23704	-0.106274
ZIC2	O95409	Zinc finger protein ZIC 2	15.0198	15.0874	14.6637	14.9833	15.0583	14.7172	15.071	14.9635	14.8393	0.0922152	0.890729	0.0502542	-0.0116971	2.10024	0.0449532	1.34724	0.284633	2.00772	0.0626558	1.20304	-0.29633
PIGN	O95427	GPI ethanolamine phosphate transferase 1	13.374	13.5842	13.5216	13.4515	13.5779	13.5255	13.4726	13.5355	13.5072	1.77748	0.07836	1.10591	-0.133146	1.31185	0.130723	0.883648	-0.0853586	1.37299	0.142208	0.847076	-0.047787
BAG4	O95429	BAG family molecular chaperone regulator 4	17.9295	17.9101	17.8467	17.9001	17.9046	17.901	17.9761	17.7659	17.9314	0.651166	0.398372	0.399712	0.0750561	0.564258	0.415976	0.380931	0.0422204	0.243283	0.737821	0.132049	0.0328356
AHSA1	O95433	Activator of 90 kDa heat shock protein ATPase homolog 1	22.3272	22.4711	22.3724	22.407	22.4065	22.3422	22.3363	22.3795	22.4208	0.773526	0.332877	0.477716	-0.0622272	0.252397	0.683043	0.165552	-0.0216656	0.498652	0.512146	0.290606	-0.0405617
PARN	O95453	Poly(A)-specific ribonuclease PARN	20.0825	20.1893	20.2086	20.1361	20.1354	20.2045	20.1175	20.1004	20.2457	0.417676	0.561392	0.250733	-0.0296853	2.20474	0.0391415	1.40736	-0.107608	1.26149	0.167093	0.777042	0.0779222
PSMG1	O95456	Proteasome assembly chaperone 1	18.2249	18.2464	18.196	18.2299	18.1535	18.2938	18.112	18.213	18.3029	0.118878	0.85952	0.0657442	-0.0153834	0.662403	0.352874	0.452381	-0.0753098	0.615759	0.432428	0.364086	0.0599264
SGPL1	O95470	Sphingosine-1-phosphate lyase 1	18.9378	19.7262	19.6598	18.963	19.6759	19.5949	18.956	19.7559	19.5675	5.20638	0.0055274	2.25748	-0.767039	4.68093	0.00569057	2.24484	-0.655076	1.44679	0.128005	0.892774	-0.111963
CTDNEP1	O95476	CTD nuclear envelope phosphatase 1	14.5295	14.4502	14.9391	14.5399	14.7881	14.4184	14.6346	14.5232	14.737	0.061595	0.927067	0.0328887	-0.0191606	0.347915	0.588418	0.230314	-0.130175	0.238854	0.741211	0.130058	0.111014
NSA2	O95478	Ribosome biogenesis protein NSA2 homolog	19.8411	19.818	19.8865	19.8311	19.7998	19.9521	19.8358	19.7561	19.9295	1.12976	0.195594	0.708644	0.0446746	1.95161	0.0539732	1.26782	-0.0867335	2.10685	0.0552914	1.25734	0.131408
H6PD	O95479	GDH/6PGL endoplasmic bifunctional protein;Glucose 1-dehydrogenase;6-phosphogluconolactonase	13.1032	13.6206	13.2181	12.8775	13.2948	13.761	12.9542	13.7953	13.3189	1.67285	0.0901291	1.04513	-0.591924	1.19067	0.157066	0.803917	-0.454379	0.244787	0.736207	0.133	-0.137545
SEC24A	O95486	Protein transport protein Sec24A	19.3209	19.5019	19.502	19.4174	19.3699	19.5341	19.3234	19.5686	19.4369	0.8848	0.28304	0.548152	-0.126226	1.48589	0.0999611	1.00017	-0.137077	0.0577193	0.931403	0.0308626	0.0108503
SEC24B	O95487	Protein transport protein Sec24B	20.1692	20.0997	20.1592	20.1874	20.0687	20.1833	20.1641	20.0843	20.1843	2.84484	0.0223737	1.65026	0.0893313	0.066103	0.909328	0.0412794	-0.00205358	2.78097	0.0277752	1.55634	0.0913849
LPHN2	O95490	Latrophilin-2	15.2789	15.3676	15.4356	15.4489	15.2953	15.3964	15.318	15.3518	15.4917	0.0643911	0.923776	0.0344334	0.0103407	0.726464	0.31774	0.497928	-0.0926132	1.36247	0.144586	0.839875	0.102954
CBX6	O95503	Chromobox protein homolog 6	15.2068	15.2454	14.7855	15.0822	15.2754	14.8523	15.1609	15.1391	14.8986	0.564037	0.454505	0.342461	-0.0699701	2.46619	0.0276889	1.55769	0.304497	2.68041	0.0304575	1.51631	-0.374467
TDP2	O95551	Tyrosyl-DNA phosphodiesterase 2	19.4347	19.4809	19.5789	19.448	19.4614	19.5996	19.4306	19.5279	19.5505	1.20215	0.175867	0.754817	-0.0522798	3.09694	0.0163482	1.78653	-0.138554	1.62009	0.102568	0.988988	0.0862745
MPC2	O95563	Mitochondrial pyruvate carrier 2	19.0607	18.9675	19.1542	19.215	18.914	19.052	18.9499	19.2066	19.0511	0.143858	0.831292	0.0802466	0.0458603	0.0427252	0.938504	0.0275637	-0.0105451	0.229717	0.748672	0.125708	0.0564054
METTL18	O95568	Histidine protein methyltransferase 1 homolog	14.6893	14.6673	14.7116	14.6241	14.6747	14.8844	14.6925	14.7732	14.7074	0.374902	0.599853	0.221955	-0.0364561	0.727448	0.317247	0.498602	-0.09917	0.391677	0.596393	0.224468	0.0627139
ETHE1	O95571	Persulfide dioxygenase ETHE1, mitochondrial	17.3861	17.2673	17.2204	17.376	17.2271	17.2813	17.381	17.2242	17.3021	3.24334	0.0152712	1.81613	0.1415	1.99285	0.0511861	1.29085	0.113106	0.430973	0.565566	0.247517	0.0283934
ACSL3	O95573	Long-chain-fatty-acid--CoA ligase 3	21.2879	21.2947	21.4403	21.3754	21.2119	21.423	21.3149	21.2222	21.4886	1.06369	0.216291	0.664962	0.0831242	1.73289	0.0716267	1.14492	-0.124588	2.50553	0.0356937	1.44741	0.207712
POLR1A	O95602	DNA-directed RNA polymerase I subunit RPA1	21.4051	21.2969	21.2933	21.4232	21.271	21.3157	21.3885	21.3257	21.2918	2.34744	0.0390184	1.40873	0.107715	2.94312	0.0176421	1.75345	0.105328	0.0464641	0.945744	0.0242263	0.00238673
PCNT	O95613	Pericentrin	18.6954	18.6342	18.602	18.6334	18.7419	18.5698	18.685	18.6762	18.582	0.127966	0.849415	0.0708803	-0.0128142	1.81498	0.0646651	1.18933	0.0867132	1.41715	0.133547	0.874366	-0.0995274
YEATS4	O95619	YEATS domain-containing protein 4	17.8375	17.784	17.9454	17.8749	17.9179	17.7756	17.8349	17.7503	17.9842	0.235866	0.732307	0.135307	0.0316766	0.331846	0.605009	0.218238	-0.0526301	0.441236	0.557694	0.253604	0.0843067
ZBTB11	O95625	Zinc finger and BTB domain-containing protein 11	15.5584	15.6279	15.4075	15.6036	15.6621	15.2872	15.6772	15.5695	15.427	0.0531658	0.935042	0.029169	-0.00678571	1.8939	0.0579465	1.23697	0.239191	2.05827	0.0585595	1.2324	-0.245976
CNOT4	O95628	CCR4-NOT transcription complex subunit 4	17.6541	17.485	17.4491	17.4654	17.5716	17.4773	17.6718	17.3808	17.4827	0.615823	0.419058	0.377726	0.11799	0.888204	0.246187	0.608735	0.127441	0.0582598	0.930785	0.0311504	-0.00945091
STAMBP	O95630	STAM-binding protein	19.9822	20.0245	20.0943	19.953	20.0228	20.101	19.9472	20.0093	20.1132	2.09229	0.0520878	1.28326	-0.0580966	3.50828	0.0110298	1.95743	-0.142017	3.4752	0.0159133	1.79824	0.0839202
NTN1	O95631	Netrin-1	14.7745	15.0036	14.9947	15.0173	14.7852	14.9525	14.7502	14.8831	15.0444	0.152481	0.821233	0.0855337	-0.043335	0.77336	0.295484	0.529466	-0.149911	0.710293	0.376472	0.424267	0.106576
CPSF4	O95639	Cleavage and polyadenylation specificity factor subunit 4	19.7548	19.8381	19.7439	19.8198	19.8558	19.6943	19.8806	19.569	19.8749	0.255609	0.713933	0.146342	0.0640812	0.295474	0.638275	0.194992	0.0473385	0.0537752	0.935912	0.0287648	0.0167427
NFATC1	O95644	Nuclear factor of activated T-cells, cytoplasmic 1	16.1824	15.9379	15.8538	16.1463	15.8519	15.9625	16.0644	15.944	15.9624	2.06057	0.054182	1.26614	0.219752	1.81759	0.0645078	1.19039	0.20481	0.11591	0.866103	0.0624304	0.0149422
ASMTL	O95671	N-acetylserotonin O-methyltransferase-like protein	17.2856	17.4714	17.6288	17.3572	17.4733	17.5928	17.3831	17.4026	17.6328	1.34305	0.143789	0.842275	-0.107117	3.01431	0.0170334	1.7687	-0.276142	2.50713	0.0356835	1.44753	0.169025
CDS2	O95674	Phosphatidate cytidylyltransferase 2	17.5758	17.8618	17.6958	17.4976	17.9176	17.6704	17.5792	17.6515	17.848	1.41634	0.130096	0.885736	-0.259428	1.41692	0.111345	0.95333	-0.187213	0.29859	0.681409	0.166592	-0.0722154
EYA4	O95677	Eyes absent homolog 4;Eyes absent homolog 1	14.9677	15.0675	15.136	15.3519	14.8059	15.172	14.8831	15.2149	15.1665	0.0713017	0.915114	0.0385248	0.0381517	0.247763	0.687772	0.162556	-0.0905794	0.46327	0.539383	0.268103	0.128731
FGFR1OP	O95684	FGFR1 oncogene partner	17.9898	18.0055	17.942	18.0227	17.9642	17.8749	18.0868	17.9012	17.9754	0.849736	0.298621	0.52488	0.0761121	1.17242	0.160618	0.794206	0.10233	0.244626	0.736347	0.132918	-0.0262178
PPP1R3D	O95685	Protein phosphatase 1 regulatory subunit 3D	14.6302	14.9265	14.8243	14.8117	14.6358	14.8822	14.6744	14.8713	14.8399	0.433211	0.549758	0.259828	-0.105788	1.17613	0.159754	0.796547	-0.143344	0.154691	0.823349	0.0844158	0.037556
BRD1	O95696	Bromodomain-containing protein 1	18.3704	18.3843	18.1854	18.2853	18.4415	18.1815	18.3057	18.3638	18.2495	1.03102	0.226385	0.645153	-0.0760384	1.56401	0.089562	1.04788	0.115011	2.40056	0.0408622	1.38868	-0.19105
POP4	O95707	Ribonuclease P protein subunit p29	17.281	17.3419	17.347	17.2718	17.4392	17.3261	17.2838	17.2527	17.4056	0.537136	0.472686	0.325427	-0.0657183	1.54545	0.0916119	1.03805	-0.0806878	0.0905365	0.895844	0.0477676	0.0149695
HERC2	O95714	E3 ubiquitin-protein ligase HERC2	19.084	19.1302	19.1221	19.1138	19.038	19.1754	19.038	19.1228	19.1098	0.191051	0.780685	0.107524	-0.0183894	0.893179	0.244561	0.611613	-0.0571734	0.469537	0.534669	0.271915	0.038784
RAB3D	O95716	Ras-related protein Rab-3D	19.2781	19.0592	19.5137	19.3748	18.962	19.5	19.2024	19.1812	19.46	1.26617	0.160351	0.794929	0.217686	1.76786	0.0684426	1.16467	-0.206108	2.53391	0.0346682	1.46007	0.423794
SNAP29	O95721	Synaptosomal-associated protein 29	20.5246	20.3876	20.4904	20.5557	20.4358	20.4025	20.5448	20.3882	20.4248	2.77092	0.0240618	1.61867	0.137878	1.66991	0.0782072	1.10675	0.102486	0.501264	0.510464	0.292035	0.0353928
OXSR1	O95747	Serine/threonine-protein kinase OSR1	20.0849	20.249	20.2794	20.2155	20.1388	20.2415	20.1014	20.2121	20.2922	0.560192	0.456716	0.340354	-0.0660483	1.45322	0.104897	0.979236	-0.137083	0.927462	0.271211	0.566692	0.0710347
GGPS1	O95749	Geranylgeranyl pyrophosphate synthase	19.9558	20.0369	20.1441	20.0124	19.9914	20.1127	19.9501	19.9978	20.1514	0.666617	0.389072	0.40997	-0.0359414	2.6715	0.0225098	1.64763	-0.163333	2.63092	0.031724	1.49861	0.127392
RAB36	O95755	Ras-related protein Rab-36	12.5601	12.6781	12.5275	12.4625	12.4297	12.8573	12.4464	12.7696	12.5589	0.561642	0.456045	0.340992	-0.136138	0.644094	0.36415	0.43872	-0.158201	0.0519348	0.938228	0.0276916	0.0220629
HSPA4L	O95757	Heat shock 70 kDa protein 4L	22.5976	22.4349	22.5883	22.5691	22.3994	22.6397	22.6274	22.3765	22.6183	2.90528	0.0209285	1.67926	0.194443	0.316487	0.618764	0.208475	-0.0173804	3.13978	0.019069	1.71967	0.211824
PTBP3	O95758	Polypyrimidine tract-binding protein 3	18.3935	18.4638	18.6175	18.4266	18.4673	18.5765	18.3816	18.4889	18.5815	2.02053	0.0566723	1.24663	-0.0727336	3.29096	0.0136819	1.86385	-0.191213	2.84593	0.0256072	1.59164	0.118479
STARD3NL	O95772	MLN64 N-terminal domain homolog	15.0639	15.2788	15.1731	15.2872	15.1059	15.1246	15.2484	15.0908	15.2303	0.170775	0.801826	0.0959197	0.0413644	0.114914	0.843658	0.0738334	0.0238422	0.0924195	0.893676	0.0488199	0.0175222
LSM8	O95777	U6 snRNA-associated Sm-like protein LSm8	20.1616	20.3512	20.5039	20.2498	20.363	20.3944	20.238	20.1735	20.5429	0.518552	0.486777	0.31267	-0.0794093	2.13832	0.0425366	1.37124	-0.263905	1.14609	0.197377	0.704704	0.184496
AP2A1	O95782	AP-2 complex subunit alpha-1	21.6492	21.7353	21.9208	21.7665	21.6145	21.9012	21.6334	21.829	21.8392	0.225496	0.743023	0.128998	-0.0432358	1.86111	0.0606705	1.21702	-0.204007	1.13198	0.201543	0.695633	0.160772
WIZ	O95785	Protein Wiz	19.8231	19.7092	19.5556	19.7678	19.6871	19.5752	19.7843	19.6461	19.5931	1.96239	0.0611142	1.21386	0.110929	3.41827	0.011994	1.92103	0.217099	2.11198	0.0550105	1.25955	-0.106169
ZMYM6	O95789	Zinc finger MYM-type protein 6	13.1272	12.9883	12.8121	13.1965	12.8097	12.8592	12.816	13.1076	12.9093	0.207442	0.763186	0.117369	0.0780417	0.707118	0.32723	0.485147	0.186374	0.523313	0.495691	0.304789	-0.108332
STAU1	O95793	Double-stranded RNA-binding protein Staufen homolog 1	20.7884	20.6633	20.6141	20.7463	20.6605	20.6531	20.786	20.5301	20.7348	1.55688	0.107316	0.969337	0.15557	1.30635	0.131809	0.880054	0.106228	0.364504	0.621454	0.206591	0.0493425
TTC4	O95801	Tetratricopeptide repeat protein 4	21.7042	21.6892	21.6753	21.7279	21.7024	21.6348	21.7396	21.6603	21.6794	1.15661	0.18812	0.725566	0.0399119	1.58036	0.0877305	1.05685	0.0607363	0.478035	0.527701	0.277612	-0.0208244
BAG2	O95816	BAG family molecular chaperone regulator 2	19.7129	19.7633	19.6194	19.744	19.7702	19.6234	19.6748	19.6652	19.7708	0.221452	0.748345	0.125898	-0.0223509	0.297198	0.637441	0.19556	0.0393359	0.438973	0.559034	0.252562	-0.0616868
BAG3	O95817	BAG family molecular chaperone regulator 3	18.9968	19.2932	18.9328	18.957	19.3327	18.92	19.142	18.9758	19.0092	0.597735	0.430678	0.365847	-0.168599	0.549946	0.424811	0.371805	0.0779737	0.993749	0.246417	0.608329	-0.246573
MAP4K4	O95819	Mitogen-activated protein kinase kinase kinase kinase 4	18.6635	18.6157	18.6524	18.6839	18.5676	18.6784	18.673	18.6293	18.676	1.6143	0.0981584	1.00807	0.0692457	0.168291	0.777963	0.109041	0.00453122	1.46613	0.12499	0.903123	0.0647144
MLYCD	O95822	Malonyl-CoA decarboxylase, mitochondrial	14.9014	15.0343	14.8712	14.9632	14.83	14.9574	14.8387	14.9719	15.0225	0.249479	0.719246	0.143122	-0.0442893	0.363053	0.57557	0.239902	-0.0493056	0.0224335	0.972184	0.0122516	0.00501633
CRYZL1	O95825	Quinone oxidoreductase-like protein 1	17.5785	17.6578	17.7568	17.6198	17.6617	17.7081	17.5671	17.7522	17.7458	1.37212	0.138236	0.859378	-0.102137	2.61573	0.0235368	1.62825	-0.148467	0.607424	0.437622	0.358901	0.0463301
AIFM1	O95831	Apoptosis-inducing factor 1, mitochondrial	22.8704	22.8279	22.8441	22.873	22.8246	22.8595	22.8428	22.8799	22.8247	0.36874	0.60478	0.218402	0.0179297	0.624188	0.375902	0.424926	0.0193291	0.0227616	0.972095	0.0122915	-0.00139936
EML2	O95834	Echinoderm microtubule-associated protein-like 2	17.939	17.8429	18.1441	17.983	17.787	18.163	17.9594	17.9016	18.0509	1.52022	0.112393	0.949262	0.116607	1.89907	0.0574798	1.24048	-0.158848	2.3435	0.0431293	1.36523	0.275455
LATS1	O95835	Serine/threonine-protein kinase LATS1	16.3117	16.0128	16.0244	16.2461	15.9177	16.0339	16.2833	15.9351	16.0361	3.13288	0.0171153	1.76661	0.325176	3.67739	0.00924766	2.03397	0.248871	1.21697	0.177806	0.750053	0.0763044
TSPAN13	O95857	Tetraspanin-13	13.3822	13.3201	13.9893	13.8405	13.1394	13.6227	13.31	13.7037	13.6306	0.201986	0.769359	0.113871	0.123161	0.503514	0.456775	0.340298	-0.236598	0.809202	0.322391	0.491617	0.359759
BPNT1	O95861	3(2),5-bisphosphate nucleotidase 1	22.1465	22.2393	22.3409	22.2181	22.124	22.3675	22.2239	22.0873	22.3959	0.369139	0.604585	0.218543	0.0459881	2.36328	0.0315634	1.50082	-0.171909	1.96449	0.066003	1.18044	0.217897
FADS2	O95864	Fatty acid desaturase 2	18.4437	18.332	18.4074	18.4738	18.2886	18.3958	18.3969	18.4763	18.29	0.522722	0.484314	0.314873	0.0725447	0.780687	0.291908	0.534754	0.073733	0.00573489	0.992885	0.00310113	-0.00118828
DDAH2	O95865	N(G),N(G)-dimethylarginine dimethylaminohydrolase 2	18.3613	18.7056	18.4756	18.3342	18.7531	18.456	18.4051	18.7104	18.4386	3.81085	0.00922082	2.03523	-0.356152	1.74245	0.0707858	1.15005	-0.0898781	3.86923	0.0119906	1.92116	-0.266273
ABHD16A	O95870	Abhydrolase domain-containing protein 16A	16.0827	15.9826	16.0324	16.028	15.9527	16.1317	16.0492	16.0551	16.0399	0.756772	0.340669	0.467668	0.0565017	0.153876	0.79512	0.0995673	-0.0146872	0.741044	0.359427	0.444389	0.0711889
TXNDC12	O95881	Thioredoxin domain-containing protein 12	21.1469	21.3247	21.1916	21.0916	21.3353	21.2458	21.1723	21.1688	21.326	1.11339	0.201093	0.696603	-0.139346	1.208	0.152719	0.816108	-0.117523	0.119659	0.861903	0.0645415	-0.0218232
TRUB2	O95900	Probable tRNA pseudouridine synthase 2	16.6844	16.7403	16.6103	16.5607	16.7086	16.7265	16.6459	16.7345	16.5138	1.21121	0.173257	0.76131	-0.0974763	0.0656718	0.90981	0.0410494	0.013483	0.825918	0.314164	0.502843	-0.110959
ECD	O95905	Protein SGT1	18.6105	18.7223	18.7433	18.7551	18.635	18.7294	18.6646	18.7464	18.7142	0.17155	0.80078	0.0964866	-0.0245164	0.535963	0.435024	0.361487	-0.0522556	0.327276	0.653418	0.184809	0.0277392
SYF2	O95926	Pre-mRNA-splicing factor SYF2	17.4199	17.2779	17.2919	17.3031	17.3663	17.3243	17.4305	17.2415	17.3577	0.742746	0.347264	0.45934	0.0892398	0.594124	0.394938	0.403471	0.0598431	0.28482	0.694886	0.158086	0.0293967
MBD3	O95983	Methyl-CpG-binding domain protein 3	19.269	19.2386	19.2061	19.3303	19.2662	19.1897	19.3012	19.1635	19.2732	1.02596	0.228566	0.640989	0.0773894	1.16658	0.161866	0.790843	0.0771364	0.00206945	0.99735	0.00115251	0.000253042
TOP3B	O95985	DNA topoisomerase 3-beta-1	18.5883	18.6385	18.2906	18.5567	18.6539	18.314	18.5222	18.6367	18.376	1.93107	0.0635311	1.19701	-0.0872803	2.70222	0.0218882	1.65979	0.228885	3.57687	0.0143831	1.84215	-0.316165
NUDT3	O95989	Diphosphoinositol polyphosphate phosphohydrolase 1	18.2377	18.4466	18.3336	18.2226	18.4248	18.3579	18.3766	18.1116	18.5036	0.153227	0.820899	0.0857101	-0.048727	0.759828	0.301859	0.520196	-0.11938	0.229701	0.748672	0.125708	0.0706526
PTTG1	O95997	Securin	16.0052	16.1833	15.8438	15.7332	16.1477	16.0618	16.0408	16.0695	16.0217	0.942299	0.260506	0.584183	-0.207092	0.156783	0.791582	0.101504	-0.0494013	0.98625	0.249093	0.603638	-0.157691
BCL10	O95999	B-cell lymphoma/leukemia 10	17.9319	17.6766	17.7838	17.7969	17.645	17.9077	17.8983	17.7226	17.7646	1.85919	0.0698064	1.1561	0.194315	0.399046	0.540386	0.267296	0.0570304	1.2828	0.161775	0.791088	0.137285
NDUFB10	O96000	NADH dehydrogenase [ubiquinone] 1 beta subcomplex subunit 10	20.8958	20.7712	20.8453	20.9352	20.7316	20.8736	20.8986	20.7457	20.8614	3.13494	0.0170956	1.76711	0.16036	1.52072	0.09471	1.0236	0.0497373	2.8347	0.0258991	1.58671	0.110623
CLPTM1	O96005	Cleft lip and palate transmembrane protein 1	19.5307	19.2252	19.3932	19.5634	19.1435	19.4026	19.4449	19.3352	19.3872	1.87301	0.0684038	1.16492	0.278338	1.53615	0.092556	1.0336	0.118674	1.34021	0.149322	0.825876	0.159664
MOCS2	O96007	Molybdopterin synthase catalytic subunit	17.2247	17.1348	17.447	17.3191	17.1384	17.3267	17.0958	17.3749	17.2813	0.0090886	0.989165	0.00473119	-0.00282987	0.784385	0.289864	0.537806	-0.138474	0.65627	0.406674	0.390753	0.135644
TOMM40	O96008	Mitochondrial import receptor subunit TOM40 homolog	21.6463	21.7859	21.9156	21.7569	21.6751	21.8954	21.6555	21.791	21.8834	0.550205	0.463449	0.333998	-0.0644194	2.35168	0.0320299	1.49444	-0.211866	1.71247	0.0911956	1.04003	0.147446
PEX11B	O96011	Peroxisomal membrane protein 11B	17.2996	17.442	17.5902	17.4658	17.3275	17.5465	17.2877	17.4793	17.5237	0.37216	0.602672	0.219919	-0.0652269	1.53818	0.0924195	1.03424	-0.202424	1.29508	0.159574	0.797039	0.137197
PAK4	O96013	Serine/threonine-protein kinase PAK 4	18.8435	18.8748	18.7739	18.8297	18.8992	18.766	18.8434	18.8787	18.7602	2.16486	0.0477481	1.32104	-0.045344	3.54598	0.010943	1.96086	0.0721544	3.78987	0.0122591	1.91154	-0.117498
CHEK2	O96017	Serine/threonine-protein kinase Chk2	18.659	18.588	18.8529	18.7497	18.5835	18.7391	18.6281	18.6883	18.7987	0.518033	0.486919	0.312543	0.0590032	1.12965	0.170757	0.767621	-0.117977	1.69282	0.0935837	1.0288	0.17698
APBA3	O96018	Amyloid beta A4 precursor protein-binding family A member 3	12.1898	12.2092	12.9678	12.2749	12.5905	12.4833	11.9557	12.6415	12.7809	0.956768	0.254747	0.59389	-0.340247	1.62156	0.0834112	1.07878	-0.603871	0.601529	0.441998	0.35458	0.263624
ACTL6A	O96019	Actin-like protein 6A	20.9086	20.9042	20.8415	20.9304	20.9317	20.8391	20.8941	20.8416	20.9099	0.257301	0.712058	0.147485	0.0185394	0.866595	0.25506	0.593357	0.0474981	0.338521	0.643149	0.191688	-0.0289586
WHSC1	O96028	Histone-lysine N-methyltransferase NSD2	18.57	18.5322	18.3381	18.5725	18.4939	18.3086	18.5926	18.4002	18.4201	1.21384	0.172554	0.763076	0.102923	2.54723	0.0251917	1.59874	0.222785	1.09527	0.211837	0.673999	-0.119862
MOCS2	O96033	Molybdopterin synthase sulfur carrier subunit	16.3441	16.1645	16.4974	16.2886	16.2659	16.5065	16.2449	16.3664	16.4497	0.154825	0.818961	0.0867368	0.0268968	2.32992	0.0329153	1.4826	-0.192019	1.641	0.0994808	1.00226	0.218916
CYB5A	P00167	Cytochrome b5	19.244	19.2931	19.1321	19.1544	19.2582	19.268	19.3644	18.9569	19.4053	0.277648	0.690977	0.160536	0.0848681	0.0488584	0.93022	0.0314145	-0.0141894	0.303815	0.675966	0.170075	0.0990575
LDHA	P00338	L-lactate dehydrogenase A chain	24.6626	24.7481	24.7161	24.6976	24.6869	24.7406	24.5924	24.7883	24.7422	0.990204	0.240869	0.618219	-0.0902303	1.20286	0.153982	0.812531	-0.0821025	0.0947634	0.891458	0.049899	-0.00812785
GLUD1	P00367	Glutamate dehydrogenase 1, mitochondrial	23.4907	23.5112	23.5112	23.4663	23.502	23.5213	23.5233	23.4869	23.5201	0.136063	0.840055	0.075692	-0.00661596	0.647785	0.362101	0.44117	-0.024072	1.05544	0.224437	0.648906	0.0174561
DHFR	P00374	Dihydrofolate reductase	21.6736	21.9572	21.8767	21.6472	21.9417	21.8951	21.7439	21.8114	21.9336	1.7736	0.0787524	1.10374	-0.215193	2.51389	0.0261331	1.58281	-0.213583	0.0107978	0.986801	0.00577041	-0.00161044
CYB5R3	P00387	NADH-cytochrome b5 reductase 3;NADH-cytochrome b5 reductase 3 membrane-bound form;NADH-cytochrome b5 reductase 3 soluble form	21.0465	20.8363	21.1371	21.0908	20.7993	21.1347	20.9927	20.8196	21.2084	2.75497	0.0247005	1.60729	0.224898	1.45533	0.104514	0.980825	-0.116783	3.68451	0.0132483	1.87784	0.341681
GSR	P00390	Glutathione reductase, mitochondrial	20.5291	20.705	20.6772	20.5443	20.7444	20.6223	20.5968	20.6996	20.6487	2.51564	0.0319933	1.49494	-0.159616	1.63282	0.0820015	1.08618	-0.0926476	1.46402	0.125361	0.901838	-0.0669683
MT-CO1	P00395	Cytochrome c oxidase subunit 1	13.8841	14.3059	14.2452	14.2556	14.3282	13.9017	14.2043	13.8958	14.3198	0.124301	0.853875	0.0686057	-0.0619777	0.0835488	0.886454	0.0523436	-0.040939	0.0374255	0.956147	0.0194755	-0.0210387
MT-CO2	P00403	Cytochrome c oxidase subunit 2	20.4926	20.4001	20.7357	20.6385	20.4112	20.5192	20.4517	20.5637	20.6099	0.374803	0.599853	0.221955	0.069259	0.483152	0.471556	0.326466	-0.0939935	0.930312	0.270398	0.567997	0.163253
SOD1	P00441	Superoxide dismutase [Cu-Zn]	22.6383	22.6423	22.4285	22.5693	22.6748	22.385	22.6662	22.3573	22.5809	0.251214	0.71795	0.143906	0.0664603	1.13812	0.169049	0.771988	0.159801	0.328027	0.652671	0.185305	-0.0933412
PNP	P00491	Purine nucleoside phosphorylase	21.9295	22.2343	22.11	21.9589	22.1747	22.108	21.9137	22.2475	22.1136	3.40372	0.0125903	1.89996	-0.284802	3.72544	0.0090504	2.04333	-0.176533	2.07064	0.0578963	1.23735	-0.108269
HPRT1	P00492	Hypoxanthine-guanine phosphoribosyltransferase	23.4336	23.5946	23.5159	23.5305	23.5429	23.4764	23.4361	23.6045	23.505	1.4263	0.128245	0.891959	-0.113912	0.403515	0.536591	0.270357	-0.0323569	1.65627	0.0978412	1.00948	-0.081555
GOT2	P00505	Aspartate aminotransferase, mitochondrial	23.3903	23.3856	23.4505	23.4006	23.3683	23.4572	23.3775	23.3927	23.4781	0.297284	0.673198	0.171857	0.00723267	2.60958	0.0236624	1.62594	-0.0724862	2.70822	0.0300089	1.52275	0.0797189
ABL1	P00519	Tyrosine-protein kinase ABL1	17.1022	16.9336	17.0081	16.9955	16.8769	17.0937	17.133	16.6854	17.258	1.33448	0.144912	0.838897	0.244904	0.19601	0.745602	0.127493	-0.0430291	1.28641	0.161409	0.792073	0.287933
EGFR	P00533	Epidermal growth factor receptor	16.4564	16.2912	16.2892	16.3829	16.245	16.4178	16.3769	16.3305	16.3136	1.51431	0.113162	0.946301	0.116464	0.624268	0.375902	0.424926	0.0652059	0.478201	0.527682	0.277628	0.0512581
PGK1	P00558	Phosphoglycerate kinase 1	24.9938	25.0954	25.174	25.0051	25.0724	25.1823	24.9783	25.1809	25.0926	1.66309	0.091577	1.03821	-0.123816	2.21718	0.0387154	1.41212	-0.157243	0.31276	0.667677	0.175433	0.0334276
AK1	P00568	Adenylate kinase isoenzyme 1	21.2993	21.1436	21.1707	21.2429	21.1857	21.205	21.291	21.1485	21.2033	2.23741	0.0438449	1.35808	0.118436	1.81799	0.0644861	1.19053	0.0847174	0.906743	0.278532	0.555125	0.0337181
PLAT	P00750	Tissue-type plasminogen activator;Tissue-type plasminogen activator chain A;Tissue-type plasminogen activator chain B	13.5384	13.307	14.064	13.7752	13.3716	13.7558	13.4298	13.5034	13.9213	0.731372	0.353451	0.451671	0.187138	1.155	0.164476	0.783898	-0.332518	2.09293	0.0561183	1.2509	0.519656
ADA	P00813	Adenosine deaminase	18.15	18.0025	18.1057	18.175	18.0023	18.0544	18.1546	17.9809	18.1543	4.01429	0.00847828	2.07169	0.164647	0.856882	0.259029	0.586652	0.0550296	1.67669	0.095673	1.01921	0.109618
MT-ATP6	P00846	ATP synthase subunit a	18.3541	18.4684	18.8541	18.4994	18.3726	18.7839	18.4184	18.6549	18.602	0.331008	0.63941	0.19422	-0.0746873	1.69992	0.0751745	1.12393	-0.32271	1.04153	0.229118	0.639941	0.248023
CA2	P00918	Carbonic anhydrase 2	24.2462	24.389	24.3155	24.2658	24.3533	24.3536	24.3183	24.2235	24.3948	0.341524	0.629915	0.200718	-0.0451565	1.16418	0.162114	0.790179	-0.0778586	0.23227	0.746867	0.126756	0.0327021
ASS1	P00966	Argininosuccinate synthase	18.3313	18.8877	18.9357	18.3043	18.917	18.8512	18.3357	18.9036	18.8631	5.82412	0.00355425	2.44925	-0.579	4.42123	0.00592863	2.22705	-0.559561	0.282442	0.696864	0.156852	-0.0194391
TIMP1	P01033	Metalloproteinase inhibitor 1	14.2026	14.3671	15.027	14.4676	14.5343	14.777	14.6608	14.3556	14.8141	0.0588929	0.929517	0.0317426	0.0246369	1.30553	0.131958	0.879563	-0.429073	2.02431	0.0614139	1.21173	0.45371
CST3	P01034	Cystatin-C	17.6672	17.2374	17.6146	17.5502	17.29	17.7093	17.6339	17.1793	17.6677	2.89345	0.0209921	1.67794	0.381564	0.454776	0.493345	0.306849	-0.0467218	3.27916	0.0178929	1.74732	0.428286
NRAS	P01111	GTPase NRas	20.8188	20.8753	20.8304	20.8333	20.8611	20.8473	20.836	20.8625	20.8611	2.2079	0.0455217	1.34178	-0.0369568	0.751289	0.305688	0.514721	-0.0169207	0.941527	0.266002	0.575115	-0.0200361
HRAS	P01112	GTPase HRas;GTPase HRas, N-terminally processed	17.6682	17.7051	17.5899	17.7104	17.5936	17.6491	17.6505	17.615	17.6649	0.427069	0.554335	0.256228	0.0384903	0.652223	0.359195	0.44467	0.0417258	0.0263896	0.96865	0.0138333	-0.0032355
KRAS	P01116	GTPase KRas;GTPase KRas, N-terminally processed	13.6947	14.2509	13.776	14.0084	13.8723	14.1834	14.4492	13.3677	14.1404	0.260987	0.708314	0.149774	0.220457	0.023031	0.967811	0.0142097	0.0175196	0.285698	0.693965	0.158662	0.202937
LDLR	P01130	Low-density lipoprotein receptor	16.1346	15.9085	16.3012	16.1246	16.0124	16.2867	15.9901	16.2196	16.1947	0.129743	0.847979	0.0716149	0.0362577	1.4423	0.106891	0.971057	-0.177772	1.0324	0.232502	0.633573	0.21403
INS	P01308	Insulin;Insulin B chain;Insulin A chain;Insulin, isoform 2	17.7985	17.667	13.2378	17.8084	17.1283	13.2098	17.1338	17.3423	13.8211	0.299358	0.671426	0.173002	0.201022	3.8079	0.00844899	2.0732	4.15732	4.00736	0.0119906	1.92116	-3.95629
IGF2	P01344	Insulin-like growth factor II;Insulin-like growth factor II;Insulin-like growth factor II Ala-25 Del;Preptin	15.9987	16.2466	15.6953	16.0446	16.0342	15.7773	15.9883	15.9231	16.0148	0.233788	0.734126	0.134229	-0.0574061	0.86678	0.25506	0.593357	0.181441	0.820342	0.316659	0.499408	-0.238847
HLA-B	P01889	HLA class I histocompatibility antigen, B-7 alpha chain;HLA class I histocompatibility antigen, B-81 alpha chain;HLA class I histocompatibility antigen, B-48 alpha chain	18.3568	18.1313	18.2114	18.2764	18.0515	18.2768	18.3446	18.0682	18.2072	2.64626	0.0274054	1.56216	0.242261	1.30879	0.131276	0.881815	0.0941264	1.95549	0.066889	1.17465	0.148135
HLA-A	P01892	HLA class I histocompatibility antigen, A-2 alpha chain	20.5332	20.3837	20.5735	20.5717	20.3841	20.5215	20.6099	20.2458	20.6269	1.99067	0.0588375	1.23035	0.233725	0.0211233	0.970539	0.0129869	-0.00238546	1.89084	0.071613	1.14501	0.23611
HLA-DRB1	P01911	HLA class II histocompatibility antigen, DRB1-15 beta chain;HLA class II histocompatibility antigen, DRB1-13 beta chain;HLA class II histocompatibility antigen, DRB1-3 chain	14.2655	14.4062	14.52	14.1612	14.3254	14.6673	14.4627	13.9364	14.6783	0.163511	0.810455	0.0912713	0.0738185	1.47756	0.101079	0.995338	-0.32536	1.21985	0.177289	0.751318	0.399179
COL4A1	P02462	Collagen alpha-1(IV) chain;Arresten	13.6258	13.5079	14.0143	13.8173	13.4209	13.8946	13.4619	13.8397	13.8477	0.0997117	0.882732	0.0541713	0.0455249	1.17014	0.161193	0.792653	-0.283843	1.13138	0.201744	0.695199	0.329368
LMNA	P02545	Prelamin-A/C;Lamin-A/C	22.5622	22.4688	22.5217	22.5302	22.4763	22.5374	22.5687	22.42	22.5537	2.0114	0.0570182	1.24399	0.0986627	0.461926	0.487409	0.312106	0.0161025	1.84359	0.0764649	1.11654	0.0825602
APOE	P02649	Apolipoprotein E	11.5468	12.0902	11.3393	10.9558	11.8129	12.1594	11.886	11.2629	12.0751	0.286874	0.683247	0.165422	-0.259118	0.451991	0.495247	0.305178	-0.395065	0.141351	0.839515	0.0759715	0.135947
APOC3	P02656	Apolipoprotein C-III	12.1214	12.1223	12.5851	12.2742	11.6677	12.9394	12.3175	11.7638	12.8626	1.20634	0.174384	0.758493	0.386457	1.97835	0.0520578	1.28351	-0.557991	2.24166	0.047517	1.32315	0.944448
TFRC	P02786	Transferrin receptor protein 1;Transferrin receptor protein 1, serum form	22.5751	22.4237	23.2067	22.6258	22.2958	23.2014	22.55	22.4933	23.1282	1.35252	0.141447	0.849405	0.179358	4.21741	0.00611068	2.21391	-0.595163	3.59568	0.0143726	1.84246	0.77452
TF	P02787	Serotransferrin	19.8167	19.3771	16.1958	19.9724	19.4087	15.5423	19.7681	19.2275	16.0134	2.46016	0.0339581	1.46906	0.514637	4.36931	0.00592863	2.22705	3.93524	4.1423	0.0116102	1.93516	-3.42061
HPX	P02790	Hemopexin	14.3748	14.1707	12.753	14.5861	14.2265	12.3345	14.2665	14.0752	12.8429	1.14128	0.192218	0.716205	0.251668	3.1938	0.015048	1.82252	1.76569	3.12896	0.0190788	1.71945	-1.51402
FTL	P02792	Ferritin light chain	15.0887	15.3433	13.2283	15.2681	15.2539	12.7846	15.0745	14.8533	13.4264	0.0130074	0.983836	0.00707735	-0.006416	3.25053	0.0139888	1.85422	1.99733	2.93323	0.0232125	1.63428	-2.00374
FTH1	P02794	Ferritin heavy chain;Ferritin heavy chain, N-terminally processed	18.6679	18.8557	17.287	18.6333	18.7536	17.2692	18.6125	18.605	17.4835	0.601642	0.428393	0.368157	-0.100189	4.28088	0.00600789	2.22128	1.29136	3.80948	0.0122591	1.91154	-1.39155
MT-ND1	P03886	NADH-ubiquinone oxidoreductase chain 1	15.659	15.6402	15.6965	15.8596	15.5492	15.6048	15.5792	15.8565	15.5954	0.0480169	0.939418	0.0271413	0.0173133	0.305066	0.629239	0.201184	0.067009	0.197697	0.778603	0.108684	-0.0496957
MT-ND2	P03891	NADH-ubiquinone oxidoreductase chain 2	15.6024	15.692	16.0434	15.9799	15.5136	15.8185	15.591	15.8632	15.823	0.0750473	0.910706	0.0406218	0.0347802	0.50497	0.456129	0.340912	-0.170577	0.753124	0.352413	0.452948	0.205357
MT-ND3	P03897	NADH-ubiquinone oxidoreductase chain 3	12.0357	11.8841	12.2351	11.9802	11.8527	12.2764	12.0543	11.8873	12.2519	2.40842	0.0363404	1.43961	0.148729	3.1	0.0163482	1.78653	-0.231075	4.69737	0.00740275	2.13061	0.379804
MT-ND5	P03915	NADH-ubiquinone oxidoreductase chain 5	13.9883	13.8055	13.8106	14.1375	13.7788	13.6753	13.8507	13.8878	13.8695	0.878976	0.285554	0.544312	0.168131	0.961813	0.221623	0.654386	0.207058	0.230649	0.748212	0.125975	-0.0389264
HMGCR	P04035	3-hydroxy-3-methylglutaryl-coenzyme A reductase	15.9931	15.8035	15.5968	16.0773	15.7087	15.5155	15.9958	15.9241	15.4048	1.4328	0.127074	0.895942	0.20999	2.94134	0.0176421	1.75345	0.516355	1.66856	0.096354	1.01613	-0.306365
CAT	P04040	Catalase	21.131	21.0095	21.1202	21.1108	21.0411	21.1001	21.169	20.9468	21.1337	1.87623	0.0682332	1.166	0.137826	0.409011	0.53143	0.274554	0.0189273	1.8096	0.0800674	1.09654	0.118898
RAF1	P04049	RAF proto-oncogene serine/threonine-protein kinase	17.1278	17.2415	16.945	17.1168	17.2534	16.9646	17.0638	17.2178	17.0763	2.41833	0.0357615	1.44658	-0.134762	1.11361	0.175143	0.756608	0.107531	2.341	0.0431293	1.36523	-0.242294
GBA	P04062	Glucosylceramidase	19.344	19.4968	19.5541	19.4523	19.3743	19.5773	19.3456	19.4984	19.5737	0.625697	0.413511	0.383513	-0.0758432	2.16636	0.0412876	1.38418	-0.187677	1.25709	0.168292	0.773938	0.111834
FUCA1	P04066	Tissue alpha-L-fucosidase	17.4399	17.2579	17.4923	17.4433	17.3086	17.3973	17.3913	17.2744	17.4991	2.5232	0.0315436	1.50109	0.144534	0.443159	0.501761	0.299503	-0.0380669	2.14368	0.0527135	1.27808	0.182601
ALDOA	P04075	Fructose-bisphosphate aldolase A	25.0276	25.0843	25.1159	25.0852	25.1169	25.0787	25.0859	25.0802	25.1125	0.539596	0.470987	0.326991	-0.0275377	0.729322	0.316219	0.500012	-0.0360991	0.198202	0.778158	0.108932	0.00856145
CSTB	P04080	Cystatin-B	21.2641	21.1996	21.1252	21.2648	21.1271	21.2155	21.2164	21.1359	21.2266	1.55675	0.107316	0.969337	0.0942376	0.76093	0.301319	0.520974	0.0593529	0.37065	0.615419	0.210829	0.0348848
ANXA1	P04083	Annexin A1	19.1287	19.6504	19.4677	19.1099	19.5966	19.5298	19.2268	19.3796	19.6013	1.89215	0.0666436	1.17624	-0.387028	2.69012	0.0222159	1.65334	-0.377792	0.0341784	0.959392	0.018004	-0.00923602
NR3C1	P04150	Glucocorticoid receptor	15.2408	15.2181	15.2899	15.1493	15.3206	15.2408	15.3148	15.1859	15.1752	0.035729	0.953884	0.0205043	-0.0066239	0.00207958	0.996862	0.00136496	-0.000370979	0.0405396	0.951273	0.0216949	-0.00625292
SOD2	P04179	Superoxide dismutase [Mn], mitochondrial	20.8921	20.9039	20.9394	20.9823	20.8925	20.8862	20.8726	20.8001	20.959	0.459567	0.528576	0.276892	0.0501817	0.112789	0.84598	0.0726399	-0.0125008	0.72805	0.366367	0.436084	0.0626825
OAT	P04181	Ornithine aminotransferase, mitochondrial;Ornithine aminotransferase, hepatic form;Ornithine aminotransferase, renal form	22.6641	22.6909	22.8442	22.6937	22.6575	22.8457	22.7199	22.6076	22.8686	0.627837	0.412327	0.384758	0.0405629	3.0607	0.0165775	1.78048	-0.160269	2.85524	0.0253847	1.59543	0.200832
TK1	P04183	Thymidine kinase, cytosolic	19.1507	19.4044	19.6217	19.1174	19.424	19.5812	19.2739	19.3178	19.6198	1.60037	0.100502	0.997825	-0.201406	3.00671	0.0171229	1.76642	-0.426874	2.5161	0.035296	1.45228	0.225468
TUBB4A	P04350	Tubulin beta-4A chain	19.1687	19.3756	19.3241	19.178	19.3974	19.3183	19.2456	19.1865	19.4088	0.793867	0.324314	0.489034	-0.122397	1.80278	0.0657485	1.18211	-0.152969	0.156705	0.821946	0.0851565	0.0305723
GAPDH	P04406	Glyceraldehyde-3-phosphate dehydrogenase	25.8948	26.049	25.9592	25.9416	26.0141	25.9156	25.9323	26.0065	25.9712	2.17846	0.0470169	1.32775	-0.10032	0.509463	0.453065	0.343839	-0.0257581	1.59893	0.105593	0.976366	-0.0745614
ASL	P04424	Argininosuccinate lyase	16.5846	16.6842	16.5687	16.566	16.5757	16.7245	16.6163	16.5377	16.7338	0.0780987	0.908059	0.0418861	-0.0102584	0.713581	0.323686	0.489876	-0.0867163	0.479621	0.526717	0.278423	0.076458
HLA-DPB1	P04440	HLA class II histocompatibility antigen, DP beta 1 chain	13.2489	12.8971	12.6497	12.9056	12.771	13.0412	13.1504	12.2915	13.2239	0.997719	0.238236	0.622993	0.448475	0.262274	0.672563	0.172267	0.130048	0.564685	0.465255	0.332309	0.318426
ERBB2	P04626	Receptor tyrosine-protein kinase erbB-2	15.1546	15.2216	15.0924	15.1451	15.017	15.1881	15.262	15.0433	15.1766	0.555703	0.459639	0.337583	0.0932789	0.293588	0.639805	0.193953	0.0348803	0.340131	0.642129	0.192378	0.0583986
CAPNS1	P04632	Calpain small subunit 1	19.3159	19.5697	19.706	19.4402	19.5165	19.6517	19.4016	19.4576	19.7465	1.23508	0.1667	0.778064	-0.128738	2.63108	0.0232308	1.63394	-0.315531	1.93265	0.0688854	1.16187	0.186794
TP53	P04637	Cellular tumor antigen p53	21.375	21.6041	21.6834	21.4076	21.6495	21.5803	21.3646	21.7129	21.5521	2.87977	0.0213677	1.67024	-0.273043	2.21909	0.0385835	1.4136	-0.222835	0.420853	0.572101	0.242528	-0.0502078
HSPB1	P04792	Heat shock protein beta-1	20.5706	20.4711	20.651	20.6034	20.5042	20.5673	20.5419	20.5306	20.666	1.32436	0.147351	0.831647	0.0699876	0.724427	0.31893	0.496305	-0.0561307	1.63735	0.100138	0.999402	0.126118
TYMS	P04818	Thymidylate synthase	20.6134	20.3808	20.6613	20.6205	20.4449	20.6206	20.6289	20.4248	20.6206	3.32945	0.0137068	1.86306	0.204126	0.389996	0.549671	0.259897	-0.0132097	3.13343	0.0190788	1.71945	0.217335
RPN1	P04843	Dolichyl-diphosphooligosaccharide--protein glycosyltransferase subunit 1	23.5069	23.6206	23.6186	23.6072	23.5616	23.5876	23.5349	23.6089	23.6297	0.609172	0.423721	0.37292	-0.047397	0.896149	0.244009	0.612594	-0.0622826	0.270865	0.708639	0.149575	0.0148856
RPN2	P04844	Dolichyl-diphosphooligosaccharide--protein glycosyltransferase subunit 2	20.7015	21.0024	21.1161	20.914	20.8807	21.0349	20.7739	20.8297	21.188	0.597507	0.430678	0.365847	-0.107805	1.84204	0.062313	1.20542	-0.316507	1.43419	0.130264	0.885176	0.208701
GNAI2	P04899	Guanine nucleotide-binding protein G(i) subunit alpha-2	20.4574	20.524	20.588	20.4861	20.495	20.589	20.4185	20.6103	20.5449	1.05254	0.218959	0.659638	-0.0890834	2.10064	0.0449532	1.34724	-0.119984	0.340238	0.6421	0.192397	0.0309003
SLC4A2	P04920	Anion exchange protein 2	17.9245	17.6921	17.696	17.8122	17.6287	17.8287	17.9099	17.4722	17.8498	1.73073	0.0836858	1.07735	0.284508	0.691883	0.335453	0.474369	0.0906614	1.12331	0.204243	0.689852	0.193847
GYPC	P04921	Glycophorin-C	13.3483	13.7641	13.5749	13.3711	13.7718	13.5773	13.3774	13.5571	13.6312	2.02634	0.0562481	1.24989	-0.332077	3.44555	0.0117649	1.92941	-0.228881	0.640772	0.415845	0.381068	-0.103196
ATP1A1	P05023	Sodium/potassium-transporting ATPase subunit alpha-1	23.4152	23.4327	23.5146	23.4326	23.4344	23.5095	23.446	23.4068	23.5061	0.202325	0.769023	0.114061	0.00663185	2.97899	0.0174639	1.75786	-0.0787875	3.11084	0.0193335	1.71369	0.0854193
ATP1B1	P05026	Sodium/potassium-transporting ATPase subunit beta-1	18.1733	18.1546	18.3824	18.0894	18.16	18.3527	18.059	18.2168	18.3209	0.819034	0.312798	0.504736	-0.0699469	2.5028	0.0263509	1.5792	-0.244787	2.55287	0.0342137	1.4658	0.17484
APP	P05067	Amyloid beta A4 protein;N-APP;Soluble APP-alpha;Soluble APP-beta;C99;Beta-amyloid protein 42;Beta-amyloid protein 40;C83;P3(42);P3(40);C80;Gamma-secretase C-terminal fragment 59;Gamma-secretase C-terminal fragment 57;Gamma-secretase C-terminal fragment 50;C31	19.0424	18.6551	18.953	19.1368	18.678	18.8202	19.0556	18.7056	18.8765	3.57345	0.0108209	1.96574	0.398717	1.79989	0.0657834	1.18188	0.19503	2.10969	0.0551158	1.25872	0.203687
ALDH2	P05091	Aldehyde dehydrogenase, mitochondrial	21.8666	21.8406	21.9869	21.94	21.8229	21.9202	21.8359	21.922	21.9701	0.165171	0.809115	0.0919898	0.0190392	0.996653	0.209935	0.677915	-0.0781975	1.24993	0.169707	0.770301	0.0972366
HMGN1	P05114	Non-histone chromosomal protein HMG-14	18.5388	18.964	18.7083	18.4646	19.0047	18.6605	18.6615	18.5293	18.8303	0.788119	0.327057	0.485376	-0.27768	1.09476	0.180543	0.743419	-0.178059	0.245647	0.73603	0.133105	-0.0996215
SLC25A5	P05141	ADP/ATP translocase 2;ADP/ATP translocase 2, N-terminally processed	23.3661	23.4115	23.5847	23.387	23.4199	23.5649	23.4259	23.3359	23.6168	0.0414273	0.945828	0.024188	0.00388654	2.97161	0.0174639	1.75786	-0.195819	2.5404	0.0345207	1.46192	0.199706
PCCA	P05165	Propionyl-CoA carboxylase alpha chain, mitochondrial	18.3971	18.5426	18.6048	18.4015	18.5038	18.6527	18.3947	18.546	18.5979	3.20326	0.0160721	1.79393	-0.133054	3.65719	0.00932154	2.03051	-0.220691	1.79184	0.0821577	1.08535	0.0876369
PCCB	P05166	Propionyl-CoA carboxylase beta chain, mitochondrial	19.4002	19.5279	19.561	19.4391	19.4371	19.6075	19.4249	19.4438	19.6026	0.701845	0.369126	0.432825	-0.0482101	3.08704	0.0163865	1.78551	-0.16899	1.67822	0.0954582	1.02019	0.12078
EIF2S1	P05198	Eukaryotic translation initiation factor 2 subunit 1	22.7574	22.9333	22.923	22.816	22.9224	22.8477	22.814	22.7729	23.0022	0.660109	0.393136	0.405457	-0.0804602	1.24305	0.144467	0.840231	-0.12854	0.283689	0.695519	0.157691	0.0480798
HMGN2	P05204	Non-histone chromosomal protein HMG-17	16.2177	16.5924	16.9194	16.1874	16.8102	16.7636	16.9572	16.4643	16.4327	0.24514	0.723115	0.140793	-0.168214	0.361585	0.57698	0.23884	-0.251158	0.179738	0.798944	0.0974834	0.0829442
RPLP1	P05386	60S acidic ribosomal protein P1	19.7676	19.7592	19.7505	19.929	19.8947	19.8095	20.016	20.0096	20.0062	0.054966	0.932794	0.0302142	0.0163536	0.174078	0.770646	0.113145	0.0487792	0.110877	0.872451	0.0592589	-0.0324256
RPLP2	P05387	60S acidic ribosomal protein P2	23.5566	23.5903	23.4749	23.3939	23.6984	23.5087	23.5519	23.579	23.4942	0.862096	0.292954	0.5332	-0.121714	0.0520458	0.925585	0.0335836	0.00822894	1.5262	0.11564	0.936892	-0.129943
RPLP0	P05388	60S acidic ribosomal protein P0;60S acidic ribosomal protein P0-like	23.9792	24.1575	24.2038	24.0853	24.0914	24.1267	23.9888	24.2104	24.1145	1.31278	0.149596	0.82508	-0.135351	1.38709	0.11662	0.933226	-0.130592	0.0363742	0.956927	0.019121	-0.00475947
JUN	P05412	Transcription factor AP-1	19.2844	19.1792	19.1998	19.1656	19.1674	19.2884	19.1866	19.1964	19.2941	0.343678	0.628097	0.201973	0.0311731	0.436766	0.506936	0.295047	-0.0485821	1.18359	0.187092	0.727946	0.0797551
POLR3D	P05423	DNA-directed RNA polymerase III subunit RPC4	18.7917	18.8417	18.6331	18.7002	18.8725	18.7067	18.7676	18.8083	18.7432	1.24452	0.164307	0.784345	-0.0876134	0.624746	0.37567	0.425194	0.0588697	1.7664	0.0849859	1.07065	-0.146483
SSB	P05455	Lupus La protein	23.1906	23.2561	23.1037	23.0819	23.3175	23.091	23.1951	23.0308	23.3139	0.183541	0.788667	0.103106	-0.0455926	0.0582257	0.918394	0.036971	-0.0136642	0.101296	0.88314	0.0539703	-0.0319284
ITGB1	P05556	Integrin beta-1	20.7771	20.6802	20.6756	20.7664	20.7199	20.6418	20.7858	20.6623	20.6984	2.11435	0.050557	1.29622	0.0889715	2.41455	0.0294807	1.53046	0.104523	0.261937	0.718417	0.143624	-0.0155512
PRKCB	P05771	Protein kinase C beta type	13.5913	13.2647	13.9462	13.5421	13.5513	13.7689	13.5473	13.5529	13.7835	0.462732	0.526446	0.278646	0.103945	2.00716	0.0503656	1.29787	-0.272626	1.55645	0.111766	0.951692	0.376571
KRT18	P05783	Keratin, type I cytoskeletal 18	18.8665	18.7763	19.1029	19.0339	18.7468	18.9438	18.9046	18.7282	19.0961	1.6087	0.0990376	1.0042	0.184599	0.708424	0.326401	0.486249	-0.112563	2.28059	0.0457342	1.33976	0.297162
MYL1	P05976	Myosin light chain 1/3, skeletal muscle isoform;Myosin light chain 3	19.8323	19.8126	19.548	19.9296	19.6238	19.5716	19.8845	19.5579	19.6673	1.25446	0.162635	0.788786	0.217361	2.46822	0.0276229	1.55873	0.286459	0.337354	0.643705	0.191313	-0.0690975
UROD	P06132	Uroporphyrinogen decarboxylase	20.7864	20.9626	20.7659	20.7835	20.9556	20.7902	20.8122	20.8251	20.8773	1.23899	0.16554	0.781096	-0.120381	0.185965	0.756571	0.12115	-0.0170568	0.856829	0.29913	0.52414	-0.103324
INSR	P06213	Insulin receptor;Insulin receptor subunit alpha;Insulin receptor subunit beta	14.3	13.3929	14.4657	13.8613	14.0098	14.4157	14.1214	13.9211	14.1476	0.622647	0.415405	0.381528	0.319627	0.704141	0.328864	0.482984	-0.248755	1.23362	0.173552	0.76057	0.568383
FYN	P06241	Tyrosine-protein kinase Fyn	16.5482	16.8204	16.8059	16.6184	16.8187	16.7727	16.6128	16.7336	16.8288	2.2513	0.0433415	1.3631	-0.197781	2.77813	0.0204733	1.68881	-0.209327	0.128534	0.853368	0.0688637	0.0115465
BCHE	P06276	Cholinesterase	11.7033	11.3423	12.2853	11.8622	11.1895	12.3093	10.9501	11.9041	12.4898	0.0250417	0.969696	0.0133645	0.0265849	1.38434	0.117177	0.931159	-0.856312	1.7543	0.0863613	1.06368	0.882897
GLA	P06280	Alpha-galactosidase A	21.6735	21.9375	21.9413	21.6492	21.9	21.9839	21.6655	21.9989	21.9009	3.16878	0.0165278	1.78179	-0.282706	3.43661	0.0117757	1.92901	-0.279286	0.0307331	0.963938	0.0159509	-0.00341988
GSN	P06396	Gelsolin	19.9454	19.9115	20.0358	19.937	19.9204	20.0481	19.9411	19.9626	20.0036	0.237842	0.729759	0.136821	0.00962766	2.54663	0.0251917	1.59874	-0.0880737	2.04542	0.059811	1.22322	0.0977014
RB1	P06400	Retinoblastoma-associated protein	18.7769	18.9322	18.99	18.8235	18.9391	18.9289	18.8289	18.908	18.9911	2.44877	0.0344509	1.4628	-0.116669	2.4322	0.0290639	1.53665	-0.160238	0.898539	0.281973	0.549793	0.0435689
PTMA	P06454	Prothymosin alpha;Prothymosin alpha, N-terminally processed;Thymosin alpha-1	21.3	21.3784	21.1927	21.1442	21.4749	21.2614	21.1951	21.4355	21.193	1.80264	0.0753245	1.12306	-0.216462	0.0165806	0.976268	0.0104307	-0.00255966	2.38925	0.0412247	1.38484	-0.213902
CDK1	P06493	Cyclin-dependent kinase 1	22.7483	22.728	22.599	22.6835	22.731	22.6547	22.7165	22.6983	22.6309	0.0480484	0.939418	0.0271413	-0.00300471	1.62585	0.0829057	1.08142	0.0878716	2.04021	0.0600839	1.22124	-0.0908763
ATP5B	P06576	ATP synthase subunit beta, mitochondrial	24.3737	24.4657	24.355	24.3346	24.4464	24.395	24.3386	24.446	24.4015	2.75023	0.0247429	1.60655	-0.103724	0.846692	0.263134	0.579822	-0.0348714	1.90526	0.0709504	1.14905	-0.0688527
EIF4E	P06730	Eukaryotic translation initiation factor 4E	21.3454	21.3314	21.2165	21.3162	21.2846	21.2549	21.2756	21.1992	21.3434	0.39331	0.583265	0.234134	0.0406844	0.405448	0.534775	0.271829	0.040788	0.000626457	0.999316	0.00029722	-0.000103633
ENO1	P06733	Alpha-enolase	26.3345	26.3624	26.3283	26.3306	26.3598	26.3446	26.3174	26.3314	26.3972	0.992334	0.240088	0.619629	-0.0237039	0.61146	0.384099	0.415556	-0.029185	0.0842766	0.902826	0.0443957	0.00548108
PYGL	P06737	Glycogen phosphorylase, liver form	23.0544	23.4187	23.2463	23.0878	23.4197	23.1757	23.0711	23.3698	23.2456	4.1924	0.00847828	2.07169	-0.331631	2.40476	0.029792	1.5259	-0.151437	2.48737	0.0364745	1.43801	-0.180194
GPI	P06744	Glucose-6-phosphate isomerase	23.9695	24.1616	24.0887	23.9867	24.1159	24.0953	23.9802	24.1297	24.0729	3.39016	0.0127586	1.8942	-0.156925	3.66848	0.00924766	2.03397	-0.106806	1.53334	0.114441	0.941417	-0.0501181
POLB	P06746	DNA polymerase beta	17.5466	17.824	17.8598	17.5464	17.8712	17.7066	17.5879	17.9774	17.6461	2.65322	0.0271975	1.56547	-0.330576	1.27785	0.13765	0.861224	-0.177226	0.917131	0.274726	0.5611	-0.15335
NPM1	P06748	Nucleophosmin	24.514	24.7705	24.6771	24.5421	24.8039	24.5615	24.5842	24.6789	24.6589	2.0631	0.0541771	1.26618	-0.204343	0.973508	0.217205	0.66313	-0.0857277	1.07633	0.217407	0.662727	-0.118615
TPM3	P06753	Tropomyosin alpha-3 chain	22.2493	22.3414	22.096	22.0951	22.3483	22.2029	22.2906	22.0434	22.3587	0.100418	0.882262	0.0544024	-0.0326627	0.0260847	0.963795	0.0160152	-0.00752767	0.0696757	0.919196	0.0365918	-0.025135
ITGAV	P06756	Integrin alpha-V;Integrin alpha-V heavy chain;Integrin alpha-V light chain	17.5037	17.5874	17.532	17.5698	17.508	17.6044	17.5521	17.5415	17.5574	0.0421675	0.945077	0.0245328	-0.00375239	0.320846	0.615033	0.211102	-0.0226733	0.238052	0.741876	0.129669	0.0189209
HEXA	P06865	Beta-hexosaminidase subunit alpha	20.4954	20.6761	20.7613	20.6157	20.5966	20.7126	20.435	20.7474	20.711	1.08176	0.210809	0.67611	-0.158033	1.72988	0.071845	1.1436	-0.212971	0.517925	0.498763	0.302106	0.0549374
SERPINE2	P07093	Glia-derived nexin	15.536	15.5379	15.971	15.7869	15.4412	15.8209	15.6726	15.4421	15.9506	1.13507	0.19379	0.712669	0.191423	1.34703	0.123931	0.906821	-0.248965	2.82348	0.0263018	1.58001	0.440389
EPHX1	P07099	Epoxide hydrolase 1	21.465	21.4223	21.7461	21.6171	21.341	21.6703	21.4966	21.3542	21.7697	1.36131	0.140116	0.853512	0.153727	1.669	0.0782549	1.10649	-0.202482	3.09152	0.0196611	1.70639	0.356209
DBI	P07108	Acyl-CoA-binding protein	20.3085	20.0591	20.6537	20.3968	20.1489	20.5463	20.4246	20.013	20.6786	2.33176	0.0396301	1.40198	0.302916	2.01682	0.0497894	1.30286	-0.249594	3.20019	0.018383	1.73558	0.552511
LDHB	P07195	L-lactate dehydrogenase B chain	25.5109	25.6047	25.6159	25.5995	25.5738	25.5729	25.5388	25.6154	25.581	0.766862	0.335507	0.474298	-0.0482648	0.616516	0.380822	0.419278	-0.0402088	0.167514	0.811802	0.0905501	-0.008056
NEFL	P07196	Neurofilament light polypeptide	17.8594	17.8155	17.821	17.9561	17.6959	17.8287	17.8947	17.7645	17.8356	1.49858	0.115592	0.937071	0.14474	1.23227	0.146845	0.83314	0.074941	0.935262	0.26866	0.570796	0.0697988
NEFM	P07197	Neurofilament medium polypeptide	19.0169	18.5791	18.9898	19.0727	18.5349	18.9283	19.0274	18.6038	18.8898	4.21659	0.00847828	2.07169	0.46638	1.41981	0.110912	0.955021	0.103024	3.29339	0.0177405	1.75103	0.363356
CENPB	P07199	Major centromere autoantigen B	17.1095	16.9738	17.2206	17.0277	17.0774	17.2163	17.1622	17.0198	17.2164	0.704848	0.36735	0.43492	0.0761051	1.40452	0.11335	0.945579	-0.117981	2.53236	0.0347344	1.45924	0.194086
GPX1	P07203	Glutathione peroxidase 1	20.9681	20.8032	18.1736	20.9574	20.6524	18.0294	20.7221	20.5705	18.4263	0.91871	0.27113	0.566823	0.207128	4.3401	0.00592863	2.22705	2.67274	4.2827	0.0100252	1.99891	-2.46561
P4HB	P07237	Protein disulfide-isomerase	24.316	24.463	24.5793	24.3472	24.4726	24.5378	24.366	24.4003	24.5718	1.71587	0.0851348	1.06989	-0.102226	3.46388	0.0114745	1.94027	-0.219938	1.97336	0.0653717	1.18461	0.117711
H1F0	P07305	Histone H1.0;Histone H1.0, N-terminally processed	20.9238	20.9881	21.0751	20.8688	21.1153	20.983	20.8208	21.1676	20.9891	1.63953	0.0946626	1.02382	-0.219202	1.57911	0.0878807	1.05611	-0.144584	0.539714	0.483162	0.315907	-0.074618
ACYP1	P07311	Acylphosphatase-1	18.854	18.973	19.1037	18.858	18.9146	19.1459	18.9596	18.8152	19.1446	0.0630127	0.925695	0.0335319	-0.0104427	2.53123	0.0255238	1.59305	-0.240878	2.05947	0.0585595	1.2324	0.230435
CRYGD	P07320	Gamma-crystallin D	16.8629	16.6774	16.586	16.8876	16.6248	16.6165	16.8319	16.6855	16.7357	2.86837	0.0218859	1.65984	0.198254	1.94399	0.0544663	1.26387	0.214792	0.122079	0.859904	0.0655501	-0.0165373
CTSD	P07339	Cathepsin D;Cathepsin D light chain;Cathepsin D heavy chain	21.5391	21.5548	21.636	21.6016	21.5597	21.5953	21.6253	21.5616	21.5812	0.508855	0.491932	0.308095	0.0299683	0.195054	0.746017	0.127251	-0.0155061	1.28632	0.161409	0.792073	0.0454744
ANXA2	P07355	Annexin A2;Putative annexin A2-like protein	22.8357	22.8331	22.7883	22.8711	22.8383	22.7327	22.8589	22.8322	22.7767	0.914857	0.272429	0.564746	0.0207246	1.96265	0.0532786	1.27345	0.0893173	1.8005	0.0811148	1.0909	-0.0685927
CAPN1	P07384	Calpain-1 catalytic subunit	20.6948	20.8204	20.8846	20.6912	20.7954	20.8828	20.6889	20.8393	20.9006	3.22842	0.0155672	1.80779	-0.126688	5.3204	0.00477697	2.32085	-0.197678	2.15644	0.0521951	1.28237	0.0709896
TUBB	P07437	Tubulin beta chain	24.4223	24.3611	24.3029	24.2659	24.4172	24.313	24.2899	24.4292	24.2968	0.653553	0.396885	0.401335	-0.0764929	0.168525	0.777794	0.109135	0.0218042	1.98908	0.0642	1.19247	-0.0982971
PSAP	P07602	Prosaposin;Saposin-A;Saposin-B-Val;Saposin-B;Saposin-C;Saposin-D	20.1139	20.1513	20.6282	20.0314	20.2539	20.5108	20.1269	20.304	20.4547	1.26625	0.160351	0.794929	-0.145692	2.75859	0.0208075	1.68178	-0.440541	1.90886	0.0708424	1.14971	0.294849
HEXB	P07686	Beta-hexosaminidase subunit beta;Beta-hexosaminidase subunit beta chain B;Beta-hexosaminidase subunit beta chain A	20.814	20.9702	20.9997	20.8768	20.9061	21.0034	20.82	20.9925	20.9881	1.66067	0.0917634	1.03733	-0.119329	2.83658	0.0195128	1.70968	-0.160136	0.708003	0.377188	0.423442	0.0408071
CTSL	P07711	Cathepsin L1;Cathepsin L1 heavy chain;Cathepsin L1 light chain	17.8493	17.6525	17.7312	17.7928	17.7245	17.7268	17.8198	17.6215	17.7795	1.95304	0.0616195	1.21028	0.154461	1.47637	0.101269	0.994525	0.0747948	1.07316	0.218366	0.660816	0.0796661
PFN1	P07737	Profilin-1	24.4102	24.608	24.549	24.4437	24.5316	24.5779	24.3996	24.6106	24.5731	2.32635	0.0398414	1.39967	-0.165577	3.12775	0.0159588	1.797	-0.148861	0.240564	0.74001	0.130762	-0.016716
BPGM	P07738	Bisphosphoglycerate mutase	19.0641	18.9233	18.9728	19.0068	18.8969	19.0401	19.012	18.844	19.0688	2.03375	0.0556306	1.25469	0.139549	0.00373106	0.995015	0.00217058	0.00038592	1.71285	0.0911956	1.04003	0.139163
APRT	P07741	Adenine phosphoribosyltransferase	22.4809	22.6833	22.5728	22.4729	22.6589	22.6182	22.4396	22.7877	22.5385	2.38957	0.0371341	1.43023	-0.24552	1.8826	0.0589472	1.22954	-0.112052	1.36286	0.144579	0.839896	-0.133469
EPRS	P07814	Bifunctional glutamate/proline--tRNA ligase;Glutamate--tRNA ligase;Proline--tRNA ligase	24.801	24.8893	24.864	24.8281	24.8919	24.8407	24.8632	24.7764	24.9047	0.199304	0.772262	0.112235	-0.0217946	0.684992	0.339715	0.468886	-0.0390797	0.152214	0.826519	0.082747	0.017285
CTSB	P07858	Cathepsin B;Cathepsin B light chain;Cathepsin B heavy chain	19.2098	19.3386	19.3601	19.2148	19.2534	19.4332	19.2227	19.2822	19.4011	1.39349	0.13429	0.871956	-0.0756187	2.97573	0.0174639	1.75786	-0.182309	1.50583	0.118729	0.925443	0.106691
HSP90AA1	P07900	Heat shock protein HSP 90-alpha	27.087	27.2168	27.0926	27.0851	27.2026	27.0957	27.1431	27.0071	27.2336	0.203782	0.76777	0.114769	-0.0370941	0.285565	0.647006	0.189092	-0.0355574	0.00614096	0.992712	0.00317691	-0.00153669
GALT	P07902	Galactose-1-phosphate uridylyltransferase	15.9736	15.7992	15.5442	15.9804	15.793	15.4984	16.128	15.3387	15.8301	1.12368	0.197704	0.703986	0.383716	1.60177	0.0854967	1.06805	0.403113	0.0355957	0.958084	0.0185965	-0.0193971
HNRNPC	P07910	Heterogeneous nuclear ribonucleoproteins C1/C2	24.4648	24.5578	24.4946	24.4684	24.5339	24.5454	24.4823	24.5639	24.523	2.78166	0.0239795	1.62016	-0.0799821	1.45953	0.1039	0.983383	-0.0491645	0.825164	0.314524	0.502346	-0.0308177
UQCRH	P07919	Cytochrome b-c1 complex subunit 6, mitochondrial	18.9181	18.9058	18.8045	18.9505	18.9232	18.6973	19.0209	18.6087	18.9276	0.638075	0.406686	0.390741	0.150596	0.983112	0.214381	0.668813	0.153381	0.00750971	0.990896	0.00397177	-0.00278473
LAMB1	P07942	Laminin subunit beta-1	19.9447	19.6056	19.7352	19.9547	19.5764	19.7302	19.9306	19.5735	19.7574	5.06532	0.00645066	2.1904	0.358185	4.30465	0.00592863	2.22705	0.202419	3.52341	0.0152213	1.81755	0.155767
YES1	P07947	Tyrosine-protein kinase Yes	19.5479	19.6294	19.5352	19.612	19.5493	19.5523	19.5245	19.6421	19.5625	0.509674	0.491611	0.308379	-0.0454731	0.157248	0.791366	0.101623	0.0114733	0.881042	0.288316	0.540132	-0.0569464
LYN	P07948	Tyrosine-protein kinase Lyn	20.1213	20.2338	20.1818	20.1725	20.1633	20.2104	20.0931	20.2512	20.1925	1.15391	0.188863	0.723854	-0.0871677	1.25379	0.142356	0.846623	-0.0659548	0.307344	0.671908	0.17269	-0.0212129
FH	P07954	Fumarate hydratase, mitochondrial	22.2131	22.1983	22.2266	22.169	22.2052	22.2474	22.2207	22.176	22.2753	0.158239	0.815769	0.0884328	0.00775274	1.07143	0.187488	0.727028	-0.0488459	1.56596	0.109904	0.958987	0.0565987
ERCC1	P07992	DNA excision repair protein ERCC-1	17.8353	18.0531	17.8929	17.8336	18.054	17.9049	17.8431	17.9866	17.9558	3.00155	0.0189993	1.72126	-0.193914	1.83792	0.0626406	1.20314	-0.080534	1.73526	0.0888228	1.05148	-0.11338
SP1	P08047	Transcription factor Sp1	17.2615	17.4055	17.4402	17.3828	17.4284	17.2297	17.4028	17.3821	17.34	0.539021	0.471227	0.32677	-0.0563227	0.0571066	0.919448	0.0364726	0.0124105	0.479695	0.526717	0.278423	-0.0687332
IGF1R	P08069	Insulin-like growth factor 1 receptor;Insulin-like growth factor 1 receptor alpha chain;Insulin-like growth factor 1 receptor beta chain	18.0084	17.852	18.2605	18.0628	17.8123	18.2671	18.035	17.9906	18.1841	1.25528	0.162526	0.789077	0.150482	2.54528	0.0251917	1.59874	-0.201773	2.37008	0.0421537	1.37516	0.352254
ANXA6	P08133	Annexin A6	23.6939	23.7982	23.9022	23.7623	23.7451	23.886	23.7182	23.7845	23.8963	0.935044	0.26371	0.578874	-0.0511252	2.93312	0.0176421	1.75345	-0.170038	2.69612	0.0303962	1.51718	0.118913
RHOC	P08134	Rho-related GTP-binding protein RhoC	18.3424	18.1755	18.2949	18.3171	18.1353	18.3084	18.3933	18.1119	18.2723	2.70864	0.0256654	1.59065	0.210061	1.12178	0.172781	0.762504	0.059103	2.67579	0.0304723	1.5161	0.150958
CD55	P08174	Complement decay-accelerating factor	16.8899	16.8998	17.2229	16.8429	16.7387	17.2434	16.8644	16.7663	17.2192	0.550591	0.463449	0.333998	0.0641651	4.70045	0.00569057	2.24484	-0.362731	2.97509	0.0225505	1.64684	0.426896
ABCB1	P08183	Multidrug resistance protein 1	16.1419	15.5926	15.9942	16.062	15.5093	16.125	16.09	15.5963	16.0861	3.87447	0.00847828	2.07169	0.531876	0.259738	0.675073	0.170649	0.029549	3.32427	0.0172135	1.76413	0.502327
SLC3A2	P08195	4F2 cell-surface antigen heavy chain	23.0013	23.1124	23.0132	22.9687	23.1294	23.0193	22.9578	23.0543	23.0836	2.02441	0.0563322	1.24924	-0.122784	1.13506	0.169744	0.770206	-0.0627836	0.872627	0.291531	0.535315	-0.0600007
GUSB	P08236	Beta-glucuronidase	16.4064	16.507	16.7789	16.6702	16.2759	16.7103	16.4636	16.5401	16.6926	0.248297	0.72005	0.142638	0.0723979	1.19198	0.156808	0.804631	-0.213885	1.51767	0.116721	0.93285	0.286283
PFKM	P08237	ATP-dependent 6-phosphofructokinase, muscle type	21.9507	22.0188	22.0389	22.0657	21.9341	22.0041	21.9972	21.9414	22.0525	0.390448	0.585536	0.232447	0.0398134	0.305642	0.628853	0.201451	-0.0272916	1.02642	0.234652	0.629576	0.067105
HSP90AB1	P08238	Heat shock protein HSP 90-beta	25.7298	25.7276	25.7055	25.7636	25.7043	25.7067	25.7207	25.7158	25.7245	0.686486	0.376513	0.42422	0.0221437	0.827526	0.270922	0.567155	0.0257454	0.147137	0.831202	0.0802932	-0.00360171
SRPR	P08240	Signal recognition particle receptor subunit alpha	20.8095	20.9236	20.8536	20.8492	20.8232	20.9236	20.7961	20.8802	20.9142	0.800487	0.321414	0.492936	-0.0574055	1.35955	0.121539	0.915285	-0.0788619	0.231158	0.747844	0.126189	0.0214564
ASNS	P08243	Asparagine synthetase [glutamine-hydrolyzing]	23.597	24.232	24.1868	23.592	24.2798	24.0921	23.6451	24.2027	24.1362	4.62011	0.0071904	2.14325	-0.626795	4.09005	0.00675472	2.17039	-0.527013	1.31968	0.154282	0.811685	-0.0997823
SYP	P08247	Synaptophysin	17.0244	16.6577	17.1992	16.9748	16.3855	17.4236	17.1038	16.4611	17.2702	2.40033	0.0366475	1.43596	0.532926	1.58744	0.0866984	1.06199	-0.263312	2.7944	0.0273156	1.56359	0.796238
HMBS	P08397	Porphobilinogen deaminase	21.2532	21.3476	21.3456	21.3238	21.3485	21.2596	21.3217	21.1727	21.4334	0.0545983	0.933204	0.0300233	0.00995445	0.350587	0.58631	0.231873	-0.0466557	0.298352	0.681652	0.166437	0.0566101
PDHA1	P08559	Pyruvate dehydrogenase E1 component subunit alpha, somatic form, mitochondrial	22.2732	22.3227	22.3744	22.2911	22.3408	22.3607	22.2649	22.3524	22.3685	2.2375	0.0438449	1.35808	-0.0622362	3.33595	0.0128175	1.8922	-0.0914726	1.43208	0.130548	0.884229	0.0292365
COL4A2	P08572	Collagen alpha-2(IV) chain;Canstatin	14.5785	14.6363	15.1341	15.0558	14.5082	14.8293	14.8957	14.701	14.7997	0.686094	0.376659	0.424052	0.228141	0.166022	0.780404	0.107681	-0.0776927	1.18843	0.185978	0.730539	0.305833
CYC1	P08574	Cytochrome c1, heme protein, mitochondrial	20.6811	20.7743	20.4771	20.7372	20.7374	20.4994	20.7071	20.7239	20.5983	0.764239	0.336797	0.472632	-0.0367514	1.9711	0.0527135	1.27808	0.18353	2.26862	0.0461998	1.33536	-0.220282
SNRPB2	P08579	U2 small nuclear ribonucleoprotein B	20.2475	20.2692	20.1645	20.2337	20.227	20.1856	20.2914	20.0873	20.2704	0.474363	0.517521	0.286072	0.0630665	0.620622	0.377768	0.422775	0.050731	0.0674758	0.922334	0.0351117	0.0123355
MET	P08581	Hepatocyte growth factor receptor	16.7888	16.7339	17.2029	17.0131	16.6389	17.0161	16.7104	17.1875	16.8058	0.028028	0.966095	0.0149803	-0.0160268	0.512044	0.450937	0.345884	-0.170857	0.30883	0.670566	0.173558	0.15483
SNRNP70	P08621	U1 small nuclear ribonucleoprotein 70 kDa	23.1767	23.1173	23.0579	23.1069	23.1694	23.0685	23.209	23.0144	23.1249	0.51221	0.489667	0.310099	0.0638173	1.03144	0.199081	0.70097	0.0804195	0.120992	0.860793	0.0651012	-0.0166022
ITGA5	P08648	Integrin alpha-5;Integrin alpha-5 heavy chain;Integrin alpha-5 light chain	16.9119	17.0602	16.9358	17.1403	16.9817	16.8724	16.9471	17.1344	16.8891	0.284705	0.685139	0.164221	-0.0589949	0.615165	0.381676	0.418305	0.100664	1.53447	0.11444	0.94142	-0.159658
VIM	P08670	Vimentin	25.2332	25.507	25.3062	25.1862	25.5335	25.3099	25.262	25.44	25.3099	2.7714	0.0240618	1.61867	-0.266338	1.67514	0.0775745	1.11028	-0.0815423	2.57297	0.0334713	1.47533	-0.184796
RPS17	P08708	40S ribosomal protein S17	23.1748	23.1266	23.045	23.171	23.1156	23.1473	23.1498	23.0973	23.0826	1.96705	0.0606526	1.21715	0.0520414	1.12058	0.173187	0.761484	0.0735722	0.278598	0.701086	0.154229	-0.0215308
GNAI3	P08754	Guanine nucleotide-binding protein G(k) subunit alpha	20.3037	20.482	20.4773	20.3631	20.4374	20.4531	20.3281	20.3967	20.5131	1.62765	0.0962808	1.01646	-0.107063	2.4377	0.0288119	1.54043	-0.149523	0.634319	0.419855	0.376901	0.0424608
ANXA5	P08758	Annexin A5	23.4062	23.4517	23.4882	23.4809	23.403	23.4744	23.362	23.46	23.4939	0.218107	0.751341	0.124163	-0.0218455	0.917468	0.235501	0.628007	-0.0691128	1.18848	0.185978	0.730539	0.0472673
RPSA	P08865	40S ribosomal protein SA	24.3666	24.3769	24.2715	24.412	24.3957	24.233	24.3625	24.3348	24.374	0.177664	0.79425	0.100043	0.0112247	0.908274	0.23936	0.620948	0.0875041	0.767245	0.344874	0.462339	-0.0762793
CD63	P08962	CD63 antigen	17.9983	17.9149	17.6165	18.0979	17.9229	17.4691	17.7978	18.1153	17.5397	0.0622362	0.926603	0.0331062	-0.0196972	1.90342	0.0571263	1.24316	0.422884	2.32027	0.044087	1.35569	-0.442581
MRPL3	P09001	39S ribosomal protein L3, mitochondrial	19.743	19.8931	19.9384	19.9482	19.873	19.7743	19.752	19.8808	19.9266	0.432628	0.550151	0.259518	-0.0679315	0.313345	0.621799	0.20635	-0.0653909	0.0158438	0.980991	0.00833494	-0.00254059
SNRPA	P09012	U1 small nuclear ribonucleoprotein A	20.8888	21.0193	21.0857	20.9388	21.0256	21.0276	20.9486	20.8824	21.1623	0.427872	0.554003	0.256488	-0.050326	1.73917	0.071065	1.14834	-0.166467	0.889313	0.284962	0.545213	0.116141
HOXC4	P09017	Homeobox protein Hox-C4	15.4247	14.995	15.3532	15.4497	15.0604	15.2696	15.3662	15.0962	15.3274	3.14722	0.0168907	1.77235	0.363018	1.29799	0.133668	0.873973	0.0968361	2.63574	0.031724	1.49861	0.266182
FGF2	P09038	Fibroblast growth factor 2	15.3507	15.5505	15.5476	15.4762	15.4848	15.5096	15.4022	15.5636	15.4808	1.31689	0.148611	0.827948	-0.123281	1.17355	0.16036	0.794903	-0.102955	0.260324	0.719893	0.142732	-0.020326
ENO2	P09104	Gamma-enolase	18.4847	18.5377	18.584	18.492	18.5185	18.5784	18.4666	18.5285	18.6452	2.13685	0.0493429	1.30678	-0.0471274	2.2311	0.0379751	1.4205	-0.121427	1.54899	0.11268	0.948152	0.0742995
ACAA1	P09110	3-ketoacyl-CoA thiolase, peroxisomal	18.8132	18.6968	18.7882	18.6978	18.7636	18.8514	18.8529	18.6581	18.8162	0.66402	0.390674	0.408186	0.0817629	0.241969	0.693613	0.158883	-0.0306644	1.4568	0.126271	0.898698	0.112427
SRP19	P09132	Signal recognition particle 19 kDa protein	19.8486	19.8545	19.8756	19.7746	19.8659	19.9677	19.915	19.7505	19.9489	0.152991	0.820998	0.0856579	0.0224082	0.792732	0.285764	0.543993	-0.0847015	1.08941	0.213653	0.67029	0.10711
GSTP1	P09211	Glutathione S-transferase P	23.1081	23.478	23.3062	23.1034	23.4662	23.3142	23.0958	23.3864	23.3946	3.52389	0.0109753	1.95958	-0.341105	2.93672	0.0176421	1.75345	-0.235879	1.22595	0.175542	0.755618	-0.105227
SNRPC	P09234	U1 small nuclear ribonucleoprotein C	19.4747	19.6161	19.5807	19.4692	19.6803	19.5723	19.5424	19.5407	19.5919	1.17644	0.182764	0.738109	-0.116932	1.62654	0.0829057	1.08142	-0.0861899	0.307424	0.671908	0.17269	-0.030742
LGALS1	P09382	Galectin-1	18.2432	18.0201	18.3765	18.2683	17.9238	18.397	18.2845	17.7645	18.5377	2.06415	0.0541041	1.26677	0.362521	1.52297	0.0943863	1.02509	-0.171723	2.39206	0.0411577	1.38555	0.534244
QDPR	P09417	Dihydropteridine reductase	19.8606	19.7754	19.6754	19.8807	19.7085	19.7218	19.8736	19.6961	19.7414	2.33668	0.0394493	1.40396	0.144943	2.82973	0.0196749	1.70609	0.158758	0.165448	0.813351	0.0897219	-0.0138149
HMGB1	P09429	High mobility group protein B1	22.6417	22.7571	22.6285	22.6371	22.7193	22.6328	22.6983	22.6251	22.7148	0.400063	0.577269	0.238622	-0.0415058	0.00266468	0.996405	0.00156412	0.000279744	0.361025	0.624684	0.20434	-0.0417856
RBP1	P09455	Retinol-binding protein 1	18.128	18.107	18.2808	18.1073	18.1793	18.245	18.145	18.0047	18.4149	0.224764	0.743884	0.128495	0.029803	1.61775	0.0838142	1.07668	-0.186771	1.3953	0.137642	0.861249	0.216574
GNAO1	P09471	Guanine nucleotide-binding protein G(o) subunit alpha	16.7878	16.6905	17.2117	16.7177	16.6813	17.2812	16.7954	16.7369	17.2071	0.99711	0.238411	0.622673	0.0640653	3.76318	0.00889066	2.05107	-0.466389	4.24917	0.0102745	1.98824	0.530454
SPARC	P09486	SPARC	15.2116	15.2745	15.5168	15.3947	15.2149	15.3953	15.4016	14.9924	15.618	0.760946	0.338306	0.470691	0.175388	0.907151	0.239849	0.620062	-0.174044	1.5059	0.118729	0.925443	0.349432
TPM1	P09493	Tropomyosin alpha-1 chain	18.4753	18.6493	18.2151	18.2345	18.757	18.3229	18.4773	18.2784	18.5289	0.427306	0.554174	0.256354	-0.165873	0.11942	0.837942	0.076786	0.0400918	0.527927	0.492283	0.307785	-0.205965
CLTA	P09496	Clathrin light chain A	21.8434	21.758	21.8208	21.8262	21.8328	21.7559	21.8622	21.7997	21.7288	0.915703	0.272157	0.565181	0.0470988	1.21255	0.151795	0.818742	0.0754191	0.335265	0.645415	0.190161	-0.0283203
CLTB	P09497	Clathrin light chain B	21.0843	21.0014	21.097	21.028	21.0712	21.0639	21.1124	21.0314	21.057	0.557352	0.45843	0.338727	0.0402444	0.0272317	0.961668	0.0169747	0.0022494	0.734946	0.362693	0.440461	0.037995
ANXA4	P09525	Annexin A4	19.9199	19.9956	20.0384	19.9873	19.9462	20.0088	19.9018	20.0377	20.0103	0.699237	0.370189	0.431576	-0.0568549	1.39345	0.115274	0.938267	-0.0828597	0.38982	0.598235	0.223128	0.0260048
CNP	P09543	2,3-cyclic-nucleotide 3-phosphodiesterase	21.7051	21.7818	21.7697	21.7048	21.758	21.8041	21.7303	21.7328	21.8185	1.25693	0.162087	0.790251	-0.0441303	2.13129	0.042903	1.36751	-0.0840435	0.921081	0.273286	0.563383	0.0399132
HMOX1	P09601	Heme oxygenase 1	17.6912	18.0844	17.2434	17.7073	18.0263	17.2727	17.6834	17.958	17.3584	3.04388	0.0182706	1.73825	-0.328961	3.47541	0.0114745	1.94027	0.402421	3.8871	0.0119906	1.92116	-0.731382
DLD	P09622	Dihydrolipoyl dehydrogenase, mitochondrial	22.824	22.7907	22.8801	22.8751	22.7831	22.8685	22.7974	22.846	22.8596	0.351273	0.620109	0.207532	0.0255407	0.723564	0.319336	0.495752	-0.0372448	1.4131	0.134206	0.872228	0.0627855
HNRNPA1	P09651	Heterogeneous nuclear ribonucleoprotein A1;Heterogeneous nuclear ribonucleoprotein A1, N-terminally processed;Heterogeneous nuclear ribonucleoprotein A1-like 2	24.143	24.3081	24.2397	24.1773	24.4145	24.0505	24.3231	23.8274	24.463	0.0570594	0.93108	0.0310128	0.0311762	0.0999042	0.864918	0.0630251	-0.0365753	0.113595	0.868659	0.0611504	0.0677516
SNRPA1	P09661	U2 small nuclear ribonucleoprotein A	21.8891	21.7655	21.8577	21.8553	21.791	21.8706	21.9253	21.7641	21.8742	2.21043	0.0454581	1.34239	0.116338	0.464107	0.486159	0.313222	0.0223586	3.13184	0.0190788	1.71945	0.0939795
CTSH	P09668	Pro-cathepsin H;Cathepsin H mini chain;Cathepsin H;Cathepsin H heavy chain;Cathepsin H light chain	16.8346	16.4412	16.8133	16.7801	16.4014	16.8846	16.6124	16.6791	16.7649	1.00789	0.234935	0.629052	0.235175	0.448596	0.497906	0.302853	-0.0785694	1.54748	0.112947	0.947126	0.313744
COX6C	P09669	Cytochrome c oxidase subunit 6C	21.8051	21.5277	21.804	21.8636	21.5476	21.6886	21.7824	21.6755	21.6292	1.9557	0.0615546	1.21074	0.233419	0.902802	0.241408	0.617248	0.109761	0.829666	0.312481	0.505176	0.123658
PARP1	P09874	Poly [ADP-ribose] polymerase 1	25.5605	25.5934	25.5405	25.5209	25.6054	25.5735	25.576	25.5128	25.5971	0.209749	0.760649	0.118816	-0.0180829	0.315466	0.619551	0.207923	-0.0178884	0.00190165	0.997454	0.00110708	-0.00019455
POLA1	P09884	DNA polymerase alpha catalytic subunit	21.382	21.364	21.3213	21.4303	21.3464	21.3021	21.3529	21.3946	21.3092	0.308059	0.662421	0.178866	0.0200888	1.53748	0.0924195	1.03424	0.0775274	1.71592	0.0911215	1.04038	-0.0574385
UCHL1	P09936	Ubiquitin carboxyl-terminal hydrolase isozyme L1	22.6569	22.8352	22.4929	22.6583	22.7968	22.5026	22.6743	22.7039	22.5928	1.36927	0.138679	0.85799	-0.115473	1.84352	0.0621761	1.20638	0.133731	2.11118	0.0550572	1.25919	-0.249203
LTA4H	P09960	Leukotriene A-4 hydrolase	23.1367	23.2815	23.4245	23.2711	23.1896	23.3551	23.1274	23.3316	23.3488	0.646539	0.401229	0.396607	-0.0891654	1.70966	0.074017	1.13067	-0.19775	1.06019	0.222557	0.652559	0.108585
ALDOC	P09972	Fructose-bisphosphate aldolase C	20.06	20.1109	20.2579	20.106	19.9857	20.3631	20.0516	20.0779	20.2899	0.128019	0.849415	0.0708803	0.0143477	2.54381	0.0251945	1.59869	-0.231089	2.1369	0.0530785	1.27508	0.245436
TFPT	P0C1Z6	TCF3 fusion partner	14.2813	14.1261	14.1167	13.9805	14.3593	14.1887	14.2091	14.1123	14.2676	0.128205	0.849415	0.0708803	-0.0422754	0.123637	0.831873	0.0799427	-0.0340137	0.0304981	0.964244	0.0158131	-0.00826168
FBXO45	P0C2W1	F-box/SPRY domain-containing protein 1	13.3331	13.3678	13.7929	13.2705	13.3707	13.6921	13.4761	13.3723	13.3951	0.0592936	0.929012	0.0319787	-0.0104186	0.930659	0.231178	0.636054	-0.266837	1.0075	0.24146	0.617155	0.256418
POLR2M	P0CAP2	DNA-directed RNA polymerase II subunit GRINL1A;Putative GRINL1B complex locus protein 2	14.3458	14.3847	14.2756	14.2924	14.4235	14.3271	14.2467	14.39	14.3164	1.54731	0.108376	0.965066	-0.104483	0.128561	0.824969	0.0835625	-0.0114428	2.02598	0.0613329	1.21231	-0.0930405
GPR89B	P0CG08	Golgi pH regulator B;Golgi pH regulator A	16.758	16.8436	16.837	16.8181	16.7329	16.9437	16.6892	16.8926	16.8719	0.492241	0.504418	0.297209	-0.0679111	1.24442	0.144218	0.840981	-0.129063	0.466459	0.536807	0.270182	0.0611521
CHTF8	P0CG12	Chromosome transmission fidelity protein 8 homolog isoform 2	17.7229	17.8062	17.717	17.6759	17.7793	17.7555	17.7308	17.8265	17.6769	1.89617	0.066445	1.17754	-0.0941111	0.0820341	0.8886	0.0512937	-0.00659625	1.52571	0.115644	0.936878	-0.0875149
CHTF8	P0CG13	Chromosome transmission fidelity protein 8 homolog	15.8137	15.9191	15.768	15.8419	15.8798	15.8196	15.8249	15.8883	15.7796	2.04689	0.054799	1.26123	-0.0688642	1.00447	0.207708	0.682546	0.0377623	2.25181	0.0469489	1.32837	-0.106627
TMSB15B	P0CG35	Thymosin beta-15B;Thymosin beta-15A	19.7199	19.4017	19.8328	19.5418	19.481	19.9185	19.5489	19.7261	19.6592	0.232257	0.736054	0.13309	0.0672728	0.976588	0.216321	0.664902	-0.199937	1.01213	0.239665	0.620395	0.26721
TRAPPC2B	P0DI82	Trafficking protein particle complex subunit 2B;Trafficking protein particle complex subunit 2	15.2873	15.4621	15.5969	15.5186	15.2549	15.5344	15.3403	15.3838	15.4997	0.0564227	0.931612	0.0307649	0.0150983	1.0039	0.207828	0.682296	-0.161598	1.2425	0.171331	0.766163	0.176696
PET100	P0DJ07	Protein PET100 homolog, mitochondrial	16.6778	16.5351	16.4334	16.5333	16.4462	16.5338	16.643	16.3407	16.6464	1.17298	0.183729	0.735823	0.177364	0.458913	0.490024	0.309783	0.0801455	0.511283	0.502946	0.298479	0.0972188
HSPA1B	P0DMV9	Heat shock 70 kDa protein 1B;Heat shock 70 kDa protein 1A	25.2763	25.6359	25.4916	25.237	25.6568	25.4747	25.3527	25.4516	25.5762	1.78645	0.0772996	1.11182	-0.292821	2.08741	0.0457544	1.33957	-0.22553	0.392474	0.595705	0.224968	-0.0672906
U2AF1	P0DN76	Splicing factor U2AF 35 kDa subunit	22.1035	22.3257	22.1791	22.1102	22.2982	22.1583	22.2469	22.0204	22.3299	0.220632	0.749024	0.125504	-0.0611954	0.409373	0.53143	0.274554	-0.0689011	0.0230901	0.972095	0.0122915	0.00770569
CBS	P0DN79	Cystathionine beta-synthase	23.0267	23.0746	23.1378	23.0261	23.1317	23.0915	23.0148	23.1041	23.1226	2.05593	0.0543234	1.26501	-0.0809116	2.58495	0.0242712	1.61491	-0.0947374	0.257029	0.723509	0.140556	0.0138257
FDX1	P10109	Adrenodoxin, mitochondrial	18.0788	18.108	17.7706	17.9842	18.0732	17.7832	18.2301	17.5915	18.0621	0.405515	0.572499	0.242225	0.173464	0.882877	0.248156	0.605276	0.225681	0.0974427	0.887999	0.0515877	-0.0522162
RAP2A	P10114	Ras-related protein Rap-2a	14.5552	14.9128	14.9405	14.7096	14.6954	15.0508	14.7019	14.7761	14.9613	0.794435	0.324074	0.489356	-0.139216	2.25165	0.0367543	1.43469	-0.3286	1.23697	0.172795	0.762468	0.189384
TROVE2	P10155	60 kDa SS-A/Ro ribonucleoprotein	21.5424	21.7693	21.7558	21.5705	21.8085	21.6729	21.5634	21.7064	21.7625	2.55376	0.0304025	1.51709	-0.202631	2.33363	0.032792	1.48423	-0.17164	0.304709	0.674962	0.170721	-0.0309912
GAA	P10253	Lysosomal alpha-glucosidase;76 kDa lysosomal alpha-glucosidase;70 kDa lysosomal alpha-glucosidase	20.5989	20.7444	20.7089	20.6571	20.7147	20.693	20.6221	20.7081	20.7417	2.05043	0.0546354	1.26253	-0.0964247	1.79006	0.0664834	1.17729	-0.0885213	0.163717	0.814963	0.0888621	-0.00790342
RRAS	P10301	Ras-related protein R-Ras	12.4113	12.5429	13.0716	12.494	12.7395	12.6892	12.523	12.6154	12.9515	1.10757	0.202539	0.693492	-0.156492	1.65623	0.0793913	1.10023	-0.427962	1.00568	0.242221	0.615788	0.27147
HLA-A	P10316	HLA class I histocompatibility antigen, A-69 alpha chain;HLA class I histocompatibility antigen, A-68 alpha chain;HLA class I histocompatibility antigen, A-34 alpha chain	14.3557	14.282	14.4707	14.1176	14.4624	14.4114	14.8803	13.5103	14.7995	0.423911	0.55722	0.253973	0.366328	0.160606	0.786906	0.104077	-0.109329	0.684755	0.389538	0.40945	0.475657
HLA-C	P10321	HLA class I histocompatibility antigen, Cw-7 alpha chain	18.8408	18.6958	18.8791	18.8064	18.7533	18.8523	18.8877	18.6416	18.8644	1.6834	0.0891099	1.05007	0.148064	0.337514	0.599354	0.222317	-0.0202872	2.1483	0.0526523	1.27858	0.168351
ARAF	P10398	Serine/threonine-protein kinase A-Raf	18.8348	18.8119	18.8513	18.8911	18.8101	18.8219	18.8219	18.8663	18.8396	0.283996	0.685876	0.163754	0.0198205	0.195753	0.745798	0.127379	0.0116762	0.149287	0.829334	0.0812706	0.00814438
HIST1H1E	P10412	Histone H1.4	21.9317	21.6757	21.6925	21.677	21.6634	21.8666	21.8094	21.866	21.6591	0.291494	0.678162	0.168667	0.0709966	0.273273	0.660289	0.180266	0.0665874	0.0159133	0.980987	0.00833656	0.00440915
DLAT	P10515	Dihydrolipoyllysine-residue acetyltransferase component of pyruvate dehydrogenase complex, mitochondrial	21.7225	21.742	21.7552	21.73	21.7033	21.781	21.7055	21.7751	21.7542	0.400362	0.577269	0.238622	-0.020778	1.75025	0.0699888	1.15497	-0.0441373	0.44583	0.553857	0.256603	0.0233593
PTPRF	P10586	Receptor-type tyrosine-protein phosphatase F	19.8688	19.5083	19.7617	19.9028	19.4382	19.7765	19.8713	19.5471	19.7103	3.46795	0.0117314	1.93065	0.383111	2.34451	0.0322046	1.49208	0.131472	2.58428	0.0331851	1.47906	0.251638
TXN	P10599	Thioredoxin	22.183	22.5779	22.2818	22.1453	22.6142	22.2668	22.4654	21.8415	22.6774	0.106337	0.875425	0.057781	-0.0799611	0.356669	0.580732	0.236024	-0.144076	0.0792162	0.908925	0.041472	0.0641149
COX5B	P10606	Cytochrome c oxidase subunit 5B, mitochondrial	22.7271	22.3755	22.5427	22.6476	22.4158	22.5269	22.6475	22.4655	22.4941	2.62744	0.0282295	1.5493	0.255121	2.14768	0.0420073	1.37668	0.152835	1.58126	0.107524	0.968494	0.102286
CTSA	P10619	Lysosomal protective protein;Lysosomal protective protein 32 kDa chain;Lysosomal protective protein 20 kDa chain	18.6543	18.8862	18.6881	18.8435	18.7228	18.6238	18.6713	18.9397	18.6278	0.642074	0.404264	0.393335	-0.126492	0.526741	0.441551	0.355019	0.0765171	1.38328	0.140025	0.853795	-0.203009
MGST1	P10620	Microsomal glutathione S-transferase 1	16.2643	16.2748	16.3522	16.4248	16.1974	16.3834	16.0952	16.4083	16.1568	0.101721	0.88072	0.0551622	-0.0320797	0.109841	0.849775	0.070696	-0.0360298	0.0139181	0.983254	0.00733448	0.00395012
MAPT	P10636	Microtubule-associated protein tau	18.5668	18.4674	18.4823	18.5083	18.4168	18.5736	18.619	18.3706	18.5339	1.58243	0.103632	0.984507	0.146434	0.347145	0.589233	0.229713	0.0347392	1.3563	0.14597	0.835737	0.111694
PRKAR1A	P10644	cAMP-dependent protein kinase type I-alpha regulatory subunit;cAMP-dependent protein kinase type I-alpha regulatory subunit, N-terminally processed	20.6368	20.4983	20.665	20.7416	20.4307	20.5947	20.678	20.4869	20.6232	2.35065	0.0387786	1.41141	0.213504	0.721209	0.320591	0.494049	0.0578492	2.22491	0.0481072	1.31779	0.155654
UROS	P10746	Uroporphyrinogen-III synthase	17.1798	17.298	17.1457	17.1724	17.3214	17.1501	17.1442	17.2179	17.2667	1.57434	0.104417	0.981227	-0.113616	0.207691	0.733595	0.134544	-0.0220413	0.841433	0.306868	0.513049	-0.091575
ESD	P10768	S-formylglutathione hydrolase	22.2412	22.2441	22.4728	22.248	22.2356	22.4207	22.2813	22.2921	22.389	0.00615419	0.992207	0.00339754	-0.000403722	2.47193	0.0275449	1.55996	-0.170641	2.31737	0.044133	1.35524	0.170237
HSPD1	P10809	60 kDa heat shock protein, mitochondrial	25.9107	25.8985	25.9267	25.8522	25.9434	25.9339	25.8879	25.9766	25.8705	0.922474	0.26956	0.569344	-0.0559177	0.436196	0.507344	0.294698	-0.0267779	0.409509	0.582712	0.234546	-0.0291398
CLU	P10909	Clusterin;Clusterin beta chain;Clusterin alpha chain	15.3029	15.1704	15.092	15.2322	15.2004	14.9349	15.1762	15.2072	15.199	0.507126	0.493291	0.306897	0.0444454	0.886723	0.246815	0.607628	0.161747	0.688742	0.387725	0.411476	-0.117301
HSPA5	P11021	78 kDa glucose-regulated protein	24.9235	24.9104	25.0626	24.8543	24.9435	25.0507	24.9877	24.7831	25.0905	0.276285	0.69243	0.159624	0.0428206	1.65277	0.0797686	1.09817	-0.146054	1.70191	0.0925215	1.03376	0.188875
LAMC1	P11047	Laminin subunit gamma-1	19.7247	19.5211	19.6061	19.7175	19.4771	19.6611	19.734	19.4916	19.6367	4.11425	0.00847828	2.07169	0.228826	2.26367	0.0361854	1.44147	0.0907873	2.59648	0.0329851	1.48168	0.138039
ACP2	P11117	Lysosomal acid phosphatase	18.9737	18.777	18.7559	18.9781	18.8098	18.7585	18.8779	18.8778	18.743	1.29136	0.154332	0.811543	0.121655	2.35005	0.0320338	1.49439	0.19077	1.08015	0.216452	0.664638	-0.0691153
MAP2	P11137	Microtubule-associated protein 2	12.0883	11.7544	12.4679	12.398	11.8734	12.2895	11.9853	12.1204	12.2406	0.665377	0.389751	0.409212	0.241175	0.546486	0.427394	0.369172	-0.175455	1.5052	0.118755	0.925347	0.416629
HSPA8	P11142	Heat shock cognate 71 kDa protein	26.1855	26.1257	26.1471	26.1271	26.1349	26.1913	26.26	25.998	26.1948	0.828494	0.308563	0.510655	0.104671	0.115056	0.843526	0.0739013	0.0131111	0.913884	0.275767	0.559458	0.0915604
SLC2A1	P11166	Solute carrier family 2, facilitated glucose transporter member 1	17.438	17.0753	17.2571	17.3586	16.9788	17.372	17.2786	17.0885	17.3384	2.24487	0.0435279	1.36123	0.31084	0.24795	0.687772	0.162556	0.0358747	2.31899	0.044087	1.35569	0.274965
SLC2A3	P11169	Solute carrier family 2, facilitated glucose transporter member 3;Solute carrier family 2, facilitated glucose transporter member 14	12.0846	11.9395	12.6129	12.2502	11.9773	12.3669	11.9628	12.2102	12.3579	0.182407	0.789739	0.102516	0.0568657	1.37246	0.119009	0.92442	-0.346735	1.56158	0.110703	0.955839	0.4036
EPB41	P11171	Protein 4.1	21.1479	21.2588	21.2337	21.1774	21.2386	21.2331	21.2412	21.1033	21.2908	0.0709288	0.915365	0.0384057	-0.0113583	0.884532	0.247614	0.606224	-0.0636819	0.426148	0.569272	0.24468	0.0523237
UMPS	P11172	Uridine 5-monophosphate synthase;Orotate phosphoribosyltransferase;Orotidine 5-phosphate decarboxylase	22.3168	22.3861	22.3156	22.3802	22.3489	22.3119	22.2916	22.3847	22.3542	0.684888	0.377575	0.422997	-0.0437171	0.025997	0.963851	0.0159901	0.00229708	1.18769	0.186219	0.729976	-0.0460141
PDHB	P11177	Pyruvate dehydrogenase E1 component subunit beta, mitochondrial	23.6044	23.5817	23.5961	23.5789	23.5939	23.6227	23.5798	23.6286	23.5993	0.348926	0.622372	0.20595	-0.0137342	0.706485	0.327554	0.484718	-0.0183398	0.10121	0.88314	0.0539703	0.00460561
DBT	P11182	Lipoamide acyltransferase component of branched-chain alpha-keto acid dehydrogenase complex, mitochondrial	18.8362	18.9258	18.9536	18.846	18.9375	18.98	18.812	18.9549	18.9761	2.9183	0.0207461	1.68306	-0.107986	3.35373	0.0124003	1.90657	-0.138521	1.21475	0.178468	0.748441	0.0305347
PYGB	P11216	Glycogen phosphorylase, brain form	21.5397	21.6082	21.4909	21.5784	21.5517	21.4988	21.5916	21.4865	21.5663	0.213181	0.756819	0.121008	0.0211201	0.832008	0.2691	0.570087	0.0512307	0.285641	0.693965	0.158662	-0.0301107
RALA	P11233	Ras-related protein Ral-A	18.1225	18.0028	17.9005	18.025	18.0767	17.8241	17.968	17.8943	18.0147	0.272319	0.696558	0.157042	0.047266	0.812333	0.277161	0.557268	0.125408	0.437044	0.560935	0.251087	-0.0781422
RALB	P11234	Ras-related protein Ral-B	19.7506	19.8118	19.7417	19.8381	19.7553	19.7828	19.7905	19.7362	19.8163	0.302083	0.668562	0.174858	0.0252501	0.14215	0.810382	0.0913101	0.01275	0.148644	0.829843	0.0810039	0.0125001
BCR	P11274	Breakpoint cluster region protein	18.4953	18.545	18.4056	18.459	18.5094	18.4907	18.4764	18.5639	18.4359	1.51089	0.113456	0.945173	-0.0625197	0.535714	0.435084	0.361427	0.0328121	1.49247	0.12114	0.916713	-0.0953318
LAMP1	P11279	Lysosome-associated membrane glycoprotein 1	19.9668	19.8633	19.9915	19.9762	19.9617	19.8344	19.9465	19.9777	19.8975	0.322527	0.647532	0.188739	0.0289516	0.523816	0.443634	0.352975	0.0553621	0.172337	0.806356	0.093473	-0.0264104
ACADM	P11310	Medium-chain specific acyl-CoA dehydrogenase, mitochondrial	22.9714	22.9895	22.7743	23.0023	22.9515	22.7543	22.9052	23.0499	22.7935	0.388546	0.587511	0.230984	-0.0373389	2.41809	0.0294583	1.53079	0.185598	2.71443	0.0299052	1.52425	-0.222937
FGFR1	P11362	Fibroblast growth factor receptor 1;Fibroblast growth factor receptor 2	14.2441	14.1102	13.9795	14.2656	14.0908	13.9341	14.3076	14.1152	13.9705	2.94493	0.0199838	1.69932	0.167074	3.74523	0.0089245	2.04942	0.311036	3.09988	0.0194186	1.71178	-0.143962
TOP1	P11387	DNA topoisomerase 1	23.6475	23.7394	23.7558	23.6926	23.71	23.7301	23.7041	23.6773	23.7618	0.479364	0.5136	0.289375	-0.0274957	1.57248	0.0886093	1.05252	-0.0678209	0.923431	0.272666	0.564369	0.0403252
TOP2A	P11388	DNA topoisomerase 2-alpha	23.4994	23.7084	23.7167	23.5444	23.7165	23.6571	23.5175	23.7129	23.6909	3.87799	0.00847828	2.07169	-0.192201	2.82558	0.019786	1.70364	-0.167809	0.630435	0.422517	0.374155	-0.0243924
G6PD	P11413	Glucose-6-phosphate 1-dehydrogenase	22.4536	22.5834	22.6445	22.5172	22.5438	22.6215	22.483	22.5989	22.6238	1.6754	0.0897622	1.04691	-0.090772	2.73957	0.0212717	1.6722	-0.145346	1.41446	0.133984	0.872947	0.0545737
UBL4A	P11441	Ubiquitin-like protein 4A	19.832	19.888	19.7918	19.8856	19.7763	19.8299	19.8541	19.7763	19.8593	0.469194	0.521229	0.282971	0.0437177	0.534092	0.436352	0.360163	0.0302372	0.116631	0.865079	0.0629441	0.0134805
PC	P11498	Pyruvate carboxylase, mitochondrial	20.074	20.0213	20.0768	20.1284	19.9858	20.0674	20.0555	20.0746	20.0832	0.802052	0.321174	0.493259	0.058684	0.171875	0.773064	0.111784	0.0101598	0.86144	0.297049	0.527172	0.0485242
DMD	P11532	Dystrophin	15.8054	15.7623	16.1091	15.7928	15.9337	16.013	15.922	16.0431	15.8897	0.327822	0.642181	0.192343	-0.0729125	1.01638	0.204014	0.690341	-0.163851	0.367359	0.618634	0.208566	0.0909389
MTHFD1	P11586	C-1-tetrahydrofolate synthase, cytoplasmic;Methylenetetrahydrofolate dehydrogenase;Methenyltetrahydrofolate cyclohydrolase;Formyltetrahydrofolate synthetase;C-1-tetrahydrofolate synthase, cytoplasmic, N-terminally processed	24.7965	24.7809	24.8727	24.7791	24.7931	24.8906	24.7798	24.8263	24.8488	0.436087	0.546817	0.262158	-0.0149632	2.51227	0.0261331	1.58281	-0.0855954	1.74934	0.086949	1.06074	0.0706323
IGF2R	P11717	Cation-independent mannose-6-phosphate receptor	21.2938	21.6057	21.5831	21.3687	21.6279	21.4648	21.3626	21.5494	21.5593	2.78102	0.0239795	1.62016	-0.252644	1.95658	0.0536144	1.27072	-0.194031	0.611023	0.435969	0.360544	-0.0586122
ADH5	P11766	Alcohol dehydrogenase class-3	21.9038	22.0817	22.1551	22.0177	22.0045	22.1165	21.954	21.9963	22.1861	0.741208	0.347865	0.45859	-0.069006	2.13414	0.0428052	1.3685	-0.19411	1.68052	0.0951429	1.02162	0.125104
CDK4	P11802	Cyclin-dependent kinase 4	20.6499	20.6935	20.6371	20.7144	20.6375	20.6203	20.7154	20.4861	20.7667	0.596768	0.430986	0.365537	0.0875537	0.133585	0.819185	0.0866181	0.0185267	0.374214	0.612448	0.21293	0.0690269
PRPS2	P11908	Ribose-phosphate pyrophosphokinase 2	20.5054	20.5706	20.8604	20.7056	20.4167	20.7767	20.5292	20.5739	20.839	0.296168	0.67407	0.171295	0.0596828	1.64683	0.0805944	1.0937	-0.245293	2.21346	0.0488815	1.31086	0.304976
PABPC1	P11940	Polyadenylate-binding protein 1	24.5657	24.4729	24.4216	24.5195	24.5259	24.4119	24.5717	24.3338	24.5352	0.842313	0.302168	0.519751	0.108145	1.05274	0.192564	0.715424	0.0961024	0.0599436	0.929916	0.0315565	0.012043
PCNA	P12004	Proliferating cell nuclear antigen	23.6665	24.0712	24.236	23.6342	24.0926	24.2198	23.6988	24.1943	24.0754	3.36562	0.0130798	1.8834	-0.452833	3.14555	0.0158916	1.79883	-0.510555	0.381386	0.606345	0.21728	0.0577221
HARS	P12081	Histidine--tRNA ligase, cytoplasmic	22.4767	22.5087	22.4212	22.493	22.4906	22.4247	22.4812	22.4001	22.4794	0.194104	0.778489	0.108748	0.0171585	1.00877	0.206391	0.685309	0.0418504	0.254738	0.725867	0.139143	-0.0246919
COL6A1	P12109	Collagen alpha-1(VI) chain	17.008	17.0449	16.9879	17.0288	16.9439	16.9847	17.0547	16.9994	16.9677	0.462718	0.526446	0.278646	0.0344378	1.55913	0.0900758	1.04539	0.050415	0.206946	0.770173	0.113412	-0.0159772
COL6A2	P12110	Collagen alpha-2(VI) chain	14.2939	13.5599	14.0112	14.247	13.5198	14.0889	13.9033	13.824	14.0939	1.52225	0.112163	0.95015	0.513505	0.264135	0.670935	0.17332	0.0833886	1.91173	0.0706808	1.1507	0.430116
SLC25A4	P12235	ADP/ATP translocase 1	19.0078	19.3407	19.4245	19.1249	19.2675	19.357	19.0944	19.2778	19.4148	2.19895	0.046025	1.33701	-0.219611	2.85654	0.019156	1.7177	-0.323072	1.53479	0.114437	0.941434	0.103461
SLC25A6	P12236	ADP/ATP translocase 3;ADP/ATP translocase 3, N-terminally processed	24.1824	24.2375	24.4387	24.3599	24.1575	24.3393	24.1705	24.3496	24.3394	0.0437264	0.943487	0.0252642	-0.010608	0.90405	0.240912	0.618142	-0.134876	0.894161	0.283013	0.548193	0.124268
IMPDH2	P12268	Inosine-5-monophosphate dehydrogenase 2	23.3173	23.4253	23.4677	23.3665	23.4164	23.4411	23.3363	23.4337	23.4476	2.30285	0.0410326	1.38687	-0.0850658	2.61778	0.0234826	1.62925	-0.11207	1.33542	0.150425	0.822679	0.0270042
TPR	P12270	Nucleoprotein TPR	23.7349	23.6981	23.7195	23.6909	23.7308	23.734	23.7576	23.6575	23.7379	0.48804	0.507449	0.294607	0.0323346	0.0452063	0.934791	0.0292854	-0.00269063	0.731832	0.364394	0.438429	0.0350253
CKB	P12277	Creatine kinase B-type	24.469	24.7983	24.4598	24.485	24.7912	24.4448	24.5266	24.6407	24.5504	2.00277	0.0576972	1.23885	-0.249872	0.0813186	0.889662	0.0507749	0.00855827	1.87493	0.0729308	1.13709	-0.25843
ANXA3	P12429	Annexin A3	16.6511	17.0374	16.7824	16.5983	16.8747	16.9798	16.5708	17.0404	16.8026	2.49752	0.0327333	1.48501	-0.377446	1.68355	0.0766008	1.11577	-0.248211	0.709043	0.376989	0.423671	-0.129235
CKMT1A	P12532	Creatine kinase U-type, mitochondrial	21.5252	21.62	21.8079	21.5844	21.5644	21.7908	21.6156	21.461	21.8464	0.189563	0.782252	0.106653	0.0265579	2.81316	0.019927	1.70056	-0.239975	2.24363	0.0475109	1.32321	0.266533
BCKDHA	P12694	2-oxoisovalerate dehydrogenase subunit alpha, mitochondrial	19.4173	19.5355	19.4916	19.4139	19.5521	19.4883	19.4429	19.4428	19.5592	1.14104	0.192218	0.716205	-0.0854193	1.62502	0.0829947	1.08095	-0.088309	0.0234992	0.971647	0.0124913	0.00288963
ACTN1	P12814	Alpha-actinin-1	22.14	22.2961	22.2579	22.1764	22.2523	22.2662	22.2211	22.1708	22.3112	0.625506	0.413592	0.383428	-0.0605621	1.58788	0.0866511	1.06223	-0.0992915	0.40805	0.582793	0.234486	0.0387293
CDH1	P12830	Cadherin-1;E-Cad/CTF1;E-Cad/CTF2;E-Cad/CTF3	15.2706	15.4673	15.2763	15.4484	15.1008	15.3311	15.3794	15.1856	15.4166	0.397291	0.579901	0.236646	0.114881	0.13892	0.813773	0.0894969	0.024759	0.311827	0.668212	0.175086	0.0901216
SRC	P12931	Proto-oncogene tyrosine-protein kinase Src	17.528	17.5701	17.6586	17.6491	17.5062	17.6229	17.5526	17.637	17.5619	0.0349918	0.955227	0.0198936	0.00546519	0.336742	0.6002	0.221704	-0.0379232	0.38768	0.600408	0.221554	0.0433884
PEPD	P12955	Xaa-Pro dipeptidase	21.2891	21.5012	21.5155	21.3566	21.4734	21.4701	21.3698	21.343	21.5882	0.853851	0.297055	0.527163	-0.100695	1.92425	0.0558784	1.25276	-0.186099	0.646681	0.411959	0.385146	0.0854047
XRCC6	P12956	X-ray repair cross-complementing protein 6	25.0189	25.1311	25.0725	25.0141	25.1135	25.1154	25.016	25.1014	25.099	3.45824	0.011847	1.92639	-0.0990092	2.49239	0.0266759	1.57388	-0.0792809	0.579096	0.455746	0.341277	-0.0197283
XRCC5	P13010	X-ray repair cross-complementing protein 5	24.5254	24.7403	24.7491	24.5718	24.7088	24.7327	24.5317	24.7735	24.7154	2.95122	0.0198904	1.70136	-0.19791	3.38407	0.0122916	1.91039	-0.189423	0.150373	0.828216	0.0818562	-0.0084877
UNG	P13051	Uracil-DNA glycosylase	18.6629	18.5288	18.5576	18.6142	18.6004	18.5885	18.661	18.436	18.595	1.16494	0.185956	0.730589	0.124327	1.54023	0.0923339	1.03464	0.0656929	0.526956	0.492695	0.307422	0.0586338
COX4I1	P13073	Cytochrome c oxidase subunit 4 isoform 1, mitochondrial	22.7256	22.557	22.6406	22.6801	22.572	22.6345	22.7388	22.4607	22.7026	2.0389	0.0554557	1.25605	0.184902	0.924368	0.233387	0.631924	0.0555871	1.4605	0.125607	0.900987	0.129315
ALAS1	P13196	5-aminolevulinate synthase, nonspecific, mitochondrial	15.78	15.3769	14.785	15.7105	15.3141	14.8398	15.5786	15.1066	15.0205	1.8652	0.069121	1.16039	0.423829	3.02415	0.0169384	1.77113	0.807923	1.62211	0.102277	0.990221	-0.384093
IFI30	P13284	Gamma-interferon-inducible lysosomal thiol reductase	16.079	15.9029	16.0394	16.1995	15.8595	15.9535	16.1076	15.8759	16.0605	2.53304	0.0311547	1.50648	0.249226	1.06536	0.189361	0.722709	0.110884	1.77101	0.0845003	1.07314	0.138341
LAMP2	P13473	Lysosome-associated membrane glycoprotein 2	18.1831	18.3092	18.7218	18.2529	18.4538	18.4612	18.4273	18.1087	18.6964	0.00751716	0.991202	0.00383772	-0.0028286	1.42928	0.109108	0.962143	-0.338711	1.21442	0.178468	0.748441	0.335883
RNH1	P13489	Ribonuclease inhibitor	21.7058	21.8262	21.6574	21.7453	21.7801	21.6615	21.7008	21.8087	21.6986	1.96839	0.0606526	1.21715	-0.0876935	1.09553	0.180338	0.743913	0.0447833	2.67315	0.0304952	1.51577	-0.132477
CYBA	P13498	Cytochrome b-245 light chain	14.6982	14.0075	14.6742	14.9827	14.0672	14.2259	14.4495	14.502	14.3838	1.11149	0.201529	0.695663	0.517884	0.627558	0.374245	0.426844	0.282158	0.506221	0.506286	0.295604	0.235726
NCAM1	P13591	Neural cell adhesion molecule 1	19.4518	19.2739	19.5946	19.4457	19.2869	19.5172	19.5726	19.1058	19.6166	1.69897	0.0869431	1.06076	0.267819	0.775923	0.29418	0.531387	-0.0861333	2.24207	0.047517	1.32315	0.353952
VCAN	P13611	Versican core protein	16.4624	16.6119	16.9227	16.6207	16.7678	16.4731	16.5824	16.3789	16.606	0.0900813	0.892759	0.0492656	-0.0310396	0.325328	0.611365	0.2137	-0.112136	0.176005	0.802755	0.0954172	0.0810966
ITGA4	P13612	Integrin alpha-4	15.8362	15.9946	15.9088	15.8604	15.9063	15.9733	15.944	15.9474	15.8133	0.769208	0.334505	0.475597	-0.0692472	0.116774	0.841107	0.0751488	-0.0182422	0.40831	0.582783	0.234493	-0.051005
ATP1A3	P13637	Sodium/potassium-transporting ATPase subunit alpha-3	16.2769	15.7619	16.5823	16.2568	15.718	16.5643	16.3612	15.7307	16.5125	4.07683	0.00847828	2.07169	0.561431	2.58026	0.0243616	1.61329	-0.254762	5.3045	0.00611547	2.21357	0.816193
EEF2	P13639	Elongation factor 2	26.0653	26.1561	26.0854	26.0994	26.1271	26.069	26.0724	26.1405	26.0897	2.02011	0.0566741	1.24662	-0.0622139	0.06791	0.90775	0.0420339	-0.00236384	2.33388	0.0435312	1.3612	-0.0598501
PDIA4	P13667	Protein disulfide-isomerase A4	24.4094	24.4933	24.614	24.4494	24.4675	24.5757	24.4528	24.4068	24.6261	0.253995	0.715297	0.145514	-0.0186704	2.90835	0.0180379	1.74381	-0.168071	2.12946	0.0538103	1.26913	0.149401
P4HA1	P13674	Prolyl 4-hydroxylase subunit alpha-1	20.69	20.6508	20.8251	20.6632	20.66	20.8365	20.6939	20.5143	20.947	0.702331	0.369002	0.432971	0.0740191	2.02272	0.0496165	1.30437	-0.18714	1.89014	0.071613	1.14501	0.261159
TPT1	P13693	Translationally-controlled tumor protein	22.7784	23.0104	22.9623	22.849	22.9303	22.9279	22.8582	22.8821	23.0111	1.17087	0.184139	0.734854	-0.112381	1.78085	0.0673653	1.17156	-0.138559	0.230383	0.748249	0.125954	0.0261777
ALAD	P13716	Delta-aminolevulinic acid dehydratase	17.9383	18.0375	17.8999	17.9436	18.0346	17.9062	17.9208	18.045	17.9453	3.80158	0.00922082	2.03523	-0.104823	0.46805	0.483465	0.315635	0.0170968	2.95379	0.0228416	1.64127	-0.12192
PLS3	P13797	Plastin-3	24.4414	24.5841	24.6665	24.4664	24.5438	24.6858	24.4782	24.4994	24.6896	1.40153	0.132851	0.876634	-0.0804342	4.13497	0.00656728	2.18261	-0.218633	2.25175	0.0469489	1.32837	0.138199
APEH	P13798	Acylamino-acid-releasing enzyme	20.675	20.6751	20.7393	20.7101	20.6246	20.7325	20.6492	20.7383	20.7177	0.0110001	0.986263	0.00600726	-0.0012455	1.29202	0.134746	0.870485	-0.0517298	0.684947	0.389498	0.409495	0.0504843
ETFA	P13804	Electron transfer flavoprotein subunit alpha, mitochondrial	22.405	22.299	22.4389	22.389	22.3023	22.436	22.3259	22.3985	22.4212	0.420369	0.559108	0.252504	0.0400556	1.11482	0.174769	0.757535	-0.0587463	1.39216	0.138136	0.859692	0.0988019
GYS1	P13807	Glycogen [starch] synthase, muscle	20.2319	20.1977	20.2498	20.2453	20.1354	20.2853	20.1882	20.2213	20.2721	0.527923	0.480183	0.318594	0.0370051	1.10558	0.177279	0.751343	-0.047245	1.42028	0.132963	0.87627	0.0842501
PRKAR2A	P13861	cAMP-dependent protein kinase type II-alpha regulatory subunit	21.5275	21.5868	21.6892	21.6237	21.5179	21.6702	21.5526	21.5901	21.6397	0.027037	0.967208	0.0144802	0.00299772	1.42284	0.110318	0.957352	-0.0984395	1.67227	0.0959947	1.01775	0.101437
GTF2F2	P13984	General transcription factor IIF subunit 2	20.6636	20.7368	20.7482	20.6911	20.7121	20.7304	20.7163	20.6215	20.7936	0.00161251	0.998094	0.00082838	0.000188828	1.29946	0.13334	0.875041	-0.0670904	0.779828	0.337941	0.471159	0.0672792
CD59	P13987	CD59 glycoprotein	18.421	18.5149	18.9287	18.4495	18.595	18.7718	18.4839	18.5767	18.7834	1.66494	0.0912955	1.03955	-0.110778	2.66287	0.0227309	1.64338	-0.37654	2.04581	0.059811	1.22322	0.265762
MTHFD2	P13995	Bifunctional methylenetetrahydrofolate dehydrogenase/cyclohydrolase, mitochondrial;NAD-dependent methylenetetrahydrofolate dehydrogenase;Methenyltetrahydrofolate cyclohydrolase	21.6313	21.6123	21.632	21.5969	21.6748	21.6206	21.5898	21.6421	21.643	0.770873	0.334058	0.476179	-0.0370509	0.836022	0.267544	0.572604	-0.0258414	0.228946	0.749247	0.125375	-0.0112095
MIF	P14174	Macrophage migration inhibitory factor	22.3955	22.0943	22.7574	22.3742	22.1065	22.7212	22.3263	22.476	22.4671	0.477992	0.514778	0.28838	0.139736	1.40939	0.112633	0.948334	-0.283195	1.27954	0.162453	0.789272	0.422931
CD99	P14209	CD99 antigen	18.0419	18.1266	18.086	18.0035	18.1545	18.0759	18.1732	17.7693	18.2198	0.15631	0.817267	0.0876363	0.0560538	0.322308	0.614069	0.211783	-0.0543658	0.345576	0.637951	0.195213	0.11042
PRKCSH	P14314	Glucosidase 2 subunit beta	23.2938	23.3253	23.3009	23.1971	23.3815	23.3261	23.263	23.3285	23.2932	1.29814	0.152718	0.816111	-0.0938021	0.852385	0.260907	0.583515	-0.055446	0.858567	0.298387	0.525221	-0.0383561
FDPS	P14324	Farnesyl pyrophosphate synthase	21.3678	21.5951	21.7064	21.4147	21.5435	21.6938	21.4168	21.6294	21.6391	2.51212	0.0320903	1.49363	-0.189568	3.36615	0.0122916	1.91039	-0.279986	1.30712	0.156959	0.804214	0.0904185
TRIM27	P14373	Zinc finger protein RFP	18.3903	18.5549	18.4462	18.4187	18.5114	18.4518	18.3702	18.5434	18.4542	2.77083	0.0240618	1.61867	-0.143563	1.8094	0.0651143	1.18632	-0.0576909	2.53684	0.0346682	1.46007	-0.085872
COX7A2	P14406	Cytochrome c oxidase subunit 7A2, mitochondrial	20.19	20.0146	20.5204	20.4804	19.8536	20.3416	20.0976	20.4015	20.2738	0.345322	0.62598	0.203439	0.166099	0.37606	0.562896	0.249572	-0.122613	0.742378	0.358865	0.445068	0.288712
NID1	P14543	Nidogen-1	18.5201	18.1288	18.5455	18.6519	18.009	18.518	18.5657	18.1654	18.5039	2.84379	0.0223737	1.65026	0.478139	0.630763	0.372055	0.429393	0.0567404	3.00518	0.0219468	1.65863	0.421399
AKR1A1	P14550	Alcohol dehydrogenase [NADP(+)]	21.0848	21.1801	21.1729	21.076	21.1289	21.2144	21.0792	21.253	21.1114	1.3866	0.135627	0.867654	-0.107325	1.34311	0.124745	0.903977	-0.0862103	0.170468	0.808471	0.0923354	-0.0211143
PKM	P14618	Pyruvate kinase PKM	25.4756	25.677	25.6598	25.4883	25.6845	25.6205	25.5363	25.5299	25.7428	1.14318	0.191649	0.717493	-0.130411	1.8991	0.0574798	1.24048	-0.17428	0.285883	0.693858	0.15873	0.0438697
HSP90B1	P14625	Endoplasmin	24.721	24.8551	24.8856	24.7393	24.857	24.8578	24.731	24.8068	24.9279	2.49676	0.0327432	1.48488	-0.109207	2.7941	0.0202458	1.69367	-0.160006	0.906018	0.278821	0.554674	0.0507991
CCNB1	P14635	G2/mitotic-specific cyclin-B1	19.6001	19.8911	19.841	19.7095	19.8522	19.7524	19.5834	19.977	19.7617	2.15593	0.0481727	1.3172	-0.275777	1.47229	0.102008	0.991367	-0.154046	1.23263	0.173802	0.759944	-0.121731
MYL6B	P14649	Myosin light chain 6B	21.3017	21.1419	21.1375	21.1602	21.1758	21.1782	21.2608	21.1543	21.0955	0.902757	0.276987	0.557541	0.0835641	1.00803	0.206682	0.684697	0.103834	0.321991	0.658475	0.181461	-0.02027
IDE	P14735	Insulin-degrading enzyme	22.4584	22.5677	22.4824	22.547	22.4981	22.4765	22.4862	22.5176	22.5118	0.386072	0.590152	0.229036	-0.0306238	0.0872611	0.882364	0.0543525	0.00697072	0.735491	0.362539	0.440645	-0.0375945
COX6B1	P14854	Cytochrome c oxidase subunit 6B1	21.2934	20.7748	21.4155	21.2759	20.9	21.2514	21.1536	20.9591	21.3033	2.18383	0.0467627	1.3301	0.363	0.558748	0.41913	0.377651	-0.0824172	2.44257	0.0391755	1.40699	0.445417
POU2F1	P14859	POU domain, class 2, transcription factor 1;POU domain, class 2, transcription factor 3	19.0772	19.0329	19.0526	19.0255	19.0288	19.128	19.0295	19.1073	19.0102	0.149783	0.824445	0.0838383	-0.0122375	0.196345	0.745339	0.127646	-0.0195522	0.0590707	0.930556	0.0312577	0.00731468
HNRNPL	P14866	Heterogeneous nuclear ribonucleoprotein L	24.0426	24.1778	24.1288	24.0219	24.1705	24.145	24.136	23.9876	24.2042	0.25032	0.71891	0.143325	-0.0451209	1.03615	0.197761	0.703859	-0.0924733	0.288557	0.691114	0.16045	0.0473525
DARS	P14868	Aspartate--tRNA ligase, cytoplasmic	23.7665	23.8727	23.992	23.849	23.8182	23.958	23.7474	23.9835	23.8982	0.833809	0.306153	0.514062	-0.103858	1.75498	0.0695386	1.15777	-0.161796	0.446119	0.553617	0.256791	0.0579376
JUP	P14923	Junction plakoglobin	20.8204	20.8425	20.867	20.7663	21.0086	20.7555	20.8219	20.8045	20.892	0.559833	0.45688	0.340197	-0.0823619	0.315824	0.619262	0.208126	-0.0353216	0.246814	0.735051	0.133682	-0.0470403
UQCRB	P14927	Cytochrome b-c1 complex subunit 7	21.8728	21.6909	21.4365	21.8002	21.7054	21.4522	21.8698	21.4838	21.6294	1.36832	0.138724	0.857847	0.220924	2.17291	0.0409266	1.38799	0.341588	0.566686	0.463896	0.333579	-0.120664
BRAF	P15056	Serine/threonine-protein kinase B-raf	15.7372	15.9148	15.9706	15.7149	15.939	15.9147	15.7268	15.7247	16.0937	0.913491	0.272858	0.564063	-0.133199	2.12789	0.0431772	1.36475	-0.266684	0.709132	0.376989	0.423671	0.133485
GLUL	P15104	Glutamine synthetase	19.8872	19.9487	19.7123	20.0411	19.9265	19.5503	19.9707	19.9626	19.6076	0.168357	0.805362	0.0940091	0.0203794	2.20844	0.0391203	1.4076	0.342928	2.57399	0.0334713	1.47533	-0.322549
AKR1B1	P15121	Aldose reductase	22.7818	23.3343	23.365	22.8778	23.3607	23.1989	22.9235	23.2378	23.3033	2.88449	0.021204	1.67358	-0.449877	2.58588	0.0242507	1.61528	-0.427984	0.131605	0.849823	0.0706718	-0.0218932
PVR	P15151	Poliovirus receptor	17.758	17.8403	17.8293	17.71	17.6958	17.895	17.7146	17.7413	17.9302	0.28042	0.688359	0.162185	-0.0315812	2.0391	0.0485412	1.31389	-0.157296	1.13885	0.199375	0.700329	0.125715
GSPT1	P15170	Eukaryotic peptide chain release factor GTP-binding subunit ERF3A	22.7602	22.8254	22.8718	22.829	22.7497	22.8187	22.8334	22.7084	22.9075	0.483785	0.510623	0.291899	0.0463549	0.768603	0.297564	0.526419	-0.0584634	1.14908	0.196477	0.706688	0.104818
IFNGR1	P15260	Interferon gamma receptor 1	14.5575	13.9505	14.1536	14.3342	14.0697	14.4142	14.3183	14.113	14.4845	1.76826	0.0793159	1.10064	0.358907	0.154898	0.793757	0.100312	0.0525421	1.28526	0.161449	0.791966	0.306365
ARSA	P15289	Arylsulfatase A;Arylsulfatase A component B;Arylsulfatase A component C	14.7728	14.9608	14.5826	14.8609	14.8518	14.7146	14.8165	14.8956	14.7563	0.993026	0.239871	0.620023	-0.0860004	1.06788	0.188642	0.724362	0.132268	1.63009	0.101207	0.994791	-0.218269
B4GALT1	P15291	Beta-1,4-galactosyltransferase 1;Lactose synthase A protein;N-acetyllactosamine synthase;Beta-N-acetylglucosaminylglycopeptide beta-1,4-galactosyltransferase;Beta-N-acetylglucosaminyl-glycolipid beta-1,4-galactosyltransferase;Processed beta-1,4-galactosyltransferase 1	14.071	14.6096	14.3395	14.2656	14.2739	14.5122	14.0434	14.414	14.6237	1.19931	0.176669	0.75284	-0.305833	1.55278	0.0909236	1.04132	-0.365128	0.176141	0.802755	0.0954172	0.0592947
EZR	P15311	Ezrin	22.7094	22.6446	22.6997	22.7541	22.6476	22.6157	22.7145	22.7064	22.6501	1.14444	0.191291	0.718306	0.0597973	1.18134	0.159064	0.798429	0.0708383	0.128134	0.85374	0.0686742	-0.011041
ATF2	P15336	Cyclic AMP-dependent transcription factor ATF-2	15.9124	15.8346	16.159	16.114	15.9664	15.8182	16.1339	15.6841	16.0123	0.977057	0.245992	0.60908	0.225078	0.178219	0.765686	0.115949	0.0569655	0.586052	0.451262	0.345571	0.168112
UCHL3	P15374	Ubiquitin carboxyl-terminal hydrolase isozyme L3	21.1388	21.2612	21.1703	21.1103	21.2666	21.1871	21.1433	21.2359	21.1855	3.04178	0.0182706	1.73825	-0.123789	1.90153	0.0573022	1.24183	-0.0501773	2.6029	0.0328623	1.4833	-0.0736122
CD46	P15529	Membrane cofactor protein	16.1075	16.1728	16.6422	16.3262	16.1283	16.4205	16.2461	16.2501	16.432	0.229779	0.738563	0.131612	0.042867	1.32094	0.128857	0.889891	-0.271626	1.7611	0.0856118	1.06747	0.314493
NME1	P15531	Nucleoside diphosphate kinase A	22.8154	23.0579	23.0836	22.9652	23.0665	22.9051	22.888	22.9698	23.1012	1.25275	0.162668	0.788698	-0.141838	0.857114	0.259029	0.586652	-0.140381	0.00684867	0.991885	0.00353858	-0.00145721
GNS	P15586	N-acetylglucosamine-6-sulfatase	20.5773	20.7009	20.4374	20.5892	20.6811	20.4524	20.5511	20.7198	20.4396	2.89538	0.0209921	1.67794	-0.128077	3.35383	0.0124003	1.90657	0.129424	4.53984	0.00820743	2.08579	-0.257502
PHKG2	P15735	Phosphorylase b kinase gamma catalytic chain, liver/testis isoform	18.5456	18.4953	18.4426	18.528	18.4648	18.5265	18.5357	18.4785	18.4701	2.29624	0.041422	1.38277	0.0568905	1.05656	0.191803	0.717144	0.0566724	0.00271747	0.996309	0.00160594	0.000218074
RPS2	P15880	40S ribosomal protein S2	24.6625	24.6386	24.6063	24.6371	24.6247	24.6017	24.6681	24.6579	24.6146	0.497948	0.500257	0.300807	0.0154769	2.03393	0.0487948	1.31163	0.0483634	1.4716	0.124083	0.906288	-0.0328865
CHN1	P15882	N-chimaerin	16.6728	16.7191	16.7331	16.7413	16.6458	16.7495	16.6797	16.802	16.6065	0.185649	0.786656	0.104215	-0.0243657	0.0104472	0.985015	0.00655728	0.00159009	0.151659	0.827031	0.0824782	-0.0259558
TCF3	P15923	Transcription factor E2-alpha	14.6182	14.5884	14.2608	14.4357	14.5707	14.5389	14.7056	14.225	14.6512	0.36695	0.606521	0.217154	0.125107	0.296714	0.637579	0.195466	0.102894	0.0458398	0.946198	0.024018	0.0222136
DSP	P15924	Desmoplakin	21.2824	21.0789	21.0405	21.1733	21.2958	20.9436	21.2762	21.0994	21.0306	0.480762	0.512731	0.29011	0.0859489	2.15532	0.0417953	1.37887	0.239047	0.946371	0.263848	0.578646	-0.153098
RPA2	P15927	Replication protein A 32 kDa subunit	20.3815	20.6595	20.5573	20.43	20.6828	20.4855	20.5327	20.4456	20.6641	0.777617	0.331136	0.479993	-0.147892	0.818491	0.274648	0.561223	-0.120909	0.106247	0.877494	0.0567556	-0.0269833
COX7C	P15954	Cytochrome c oxidase subunit 7C, mitochondrial	17.3266	17.2802	19.4236	18.3711	16.7737	18.7408	17.4953	18.5445	18.0093	0.116603	0.861842	0.0645722	0.198195	0.888564	0.246049	0.608979	-0.993561	0.829149	0.312669	0.504916	1.19176
TIMP2	P16035	Metalloproteinase inhibitor 2	14.3494	13.8442	14.4117	14.2737	13.9349	14.3361	14.2842	13.9405	14.3283	3.26798	0.0148727	1.82761	0.395861	0.723441	0.319351	0.495732	-0.0562884	3.41525	0.0159368	1.7976	0.452149
NQO2	P16083	Ribosyldihydronicotinamide dehydrogenase [quinone]	19.2855	19.2652	19.1552	19.2802	19.2655	19.1728	19.2707	19.2043	19.2356	0.746656	0.345203	0.461926	0.0338205	1.67063	0.0781424	1.10711	0.0909392	0.834512	0.309786	0.508938	-0.0571187
CBR1	P16152	Carbonyl reductase [NADPH] 1	22.5817	22.7127	22.8232	22.6131	22.6401	22.8517	22.5898	22.6738	22.8281	1.60824	0.0990376	1.0042	-0.0807095	4.30872	0.00592863	2.22705	-0.239491	2.65488	0.0309881	1.50881	0.158782
ACADS	P16219	Short-chain specific acyl-CoA dehydrogenase, mitochondrial	17.0047	16.7867	16.9786	16.9955	16.874	16.9345	17.0275	16.9059	16.9422	1.85231	0.0703717	1.1526	0.153694	1.58843	0.0866231	1.06237	0.0574748	1.18631	0.186287	0.729817	0.0962194
CREB1	P16220	Cyclic AMP-responsive element-binding protein 1	19.4857	19.356	19.413	19.425	19.3581	19.4888	19.5192	19.4114	19.3837	1.43123	0.127352	0.894995	0.101468	0.504539	0.456445	0.340611	0.048116	0.669066	0.398727	0.399324	0.0533524
GLB1	P16278	Beta-galactosidase	19.3697	19.52	19.5324	19.4866	19.3575	19.587	19.3327	19.6197	19.4979	0.502078	0.497221	0.303451	-0.102693	1.26056	0.14104	0.850656	-0.14272	0.189802	0.78745	0.103777	0.040027
PPP3CB	P16298	Serine/threonine-protein phosphatase 2B catalytic subunit beta isoform	16.0304	16.1717	15.7712	16.0076	16.0933	15.9066	16.1133	15.868	16.0161	0.0210856	0.973988	0.0114464	0.00610383	0.915574	0.236271	0.626589	0.1525	0.563538	0.466039	0.331578	-0.146396
NCK1	P16333	Cytoplasmic protein NCK1	19.1887	19.2023	19.2444	19.2386	19.1743	19.2241	19.2316	19.1564	19.2355	0.955927	0.255076	0.593331	0.0419547	0.378484	0.560396	0.251505	-0.0150382	1.75859	0.0859291	1.06586	0.0569928
GCFC2	P16383	GC-rich sequence DNA-binding factor 2	19.3078	19.2479	19.3037	19.2805	19.2318	19.3195	19.2795	19.3431	19.2425	0.156036	0.817267	0.0876363	0.0149822	0.00924507	0.986987	0.00568878	0.000709534	0.124546	0.856896	0.0670718	0.0142727
HIST1H1D	P16402	Histone H1.3	19.5137	19.7833	19.4432	19.3543	19.7635	19.6116	19.5092	19.5083	19.6925	1.03143	0.226248	0.645414	-0.226014	0.614126	0.382246	0.417657	-0.123398	0.37385	0.612652	0.212786	-0.102615
HIST1H1C	P16403	Histone H1.2	25.6672	25.5785	25.5168	25.5957	25.6691	25.5901	25.6344	25.615	25.6138	0.127013	0.850599	0.0702752	0.0115916	0.75714	0.303241	0.518212	0.0588849	0.529904	0.490849	0.309052	-0.0472933
POR	P16435	NADPH--cytochrome P450 reductase	21.3443	21.3241	21.5933	21.5002	21.2841	21.4807	21.3906	21.2904	21.582	1.10187	0.204247	0.689845	0.112156	1.12899	0.17087	0.767333	-0.140326	2.57937	0.0333335	1.47712	0.252481
FER	P16591	Tyrosine-protein kinase Fer	15.1788	15.3432	15.5073	15.3511	15.3106	15.5481	15.433	15.1423	15.6686	0.222932	0.746243	0.12712	0.0556246	1.33098	0.127067	0.895966	-0.253699	1.76389	0.0853739	1.06867	0.309323
ATP2A2	P16615	Sarcoplasmic/endoplasmic reticulum calcium ATPase 2	22.9912	22.9193	23.0752	23.0106	22.893	23.0893	23.0171	22.8969	23.0925	3.09397	0.0175793	1.755	0.103235	2.95978	0.0176118	1.7542	-0.07934	4.31455	0.00977289	2.00998	0.182575
CPE	P16870	Carboxypeptidase E	16.2107	15.8383	16.2292	16.301	15.7128	16.193	16.225	15.8213	16.2097	3.15057	0.0168171	1.77425	0.454753	0.51154	0.451182	0.345648	0.0349197	3.30383	0.017578	1.75503	0.419834
PLCG2	P16885	1-phosphatidylinositol 4,5-bisphosphate phosphodiesterase gamma-2	18.1974	18.1375	18.1283	18.1009	18.0986	18.1642	18.1418	18.0633	18.1849	0.595817	0.431724	0.364794	0.0469042	0.141679	0.811008	0.0909749	-0.0124137	1.02918	0.233772	0.631208	0.0593179
FAH	P16930	Fumarylacetoacetase	20.4671	20.6603	20.6146	20.5854	20.6389	20.5132	20.4836	20.646	20.6092	1.65547	0.0924767	1.03397	-0.136377	0.605436	0.387914	0.411264	-0.0669429	0.969709	0.254875	0.593672	-0.0694345
STMN1	P16949	Stathmin	22.1529	21.9739	21.8492	22.0368	22.0038	21.9676	22.1271	21.9523	21.8991	1.55281	0.107879	0.967063	0.128938	1.81871	0.0644558	1.19074	0.20027	0.888087	0.285348	0.544625	-0.0713323
YBX3	P16989	Y-box-binding protein 3	20.7799	20.8448	20.6608	20.6976	20.8799	20.7624	20.8893	20.5735	20.8345	0.0717583	0.914707	0.0387179	0.0228647	0.185055	0.757579	0.120572	0.0363661	0.042138	0.9501	0.0222309	-0.0135015
ZNF22	P17026	Zinc finger protein 22	15.9701	16.1744	15.9211	16.4041	15.9515	15.6795	16.0933	16.1893	15.7572	0.123417	0.854385	0.0683466	0.0507476	1.1793	0.159475	0.797306	0.369905	1.4177	0.133487	0.874562	-0.319157
ZNF24	P17028	Zinc finger protein 24	19.0129	18.9722	18.4579	19.0629	18.9523	18.2995	19	18.7312	18.5562	0.81425	0.315167	0.501459	0.140032	2.79537	0.0202458	1.69367	0.587404	1.84966	0.0756499	1.12119	-0.447371
ZKSCAN1	P17029	Zinc finger protein with KRAB and SCAN domains 1	13.3284	13.6545	13.0763	13.2978	13.1384	13.3963	13.7177	13.0291	12.9792	0.300072	0.670923	0.173327	0.173964	0.737902	0.31223	0.505525	0.297366	0.207194	0.770001	0.113509	-0.123403
NAGA	P17050	Alpha-N-acetylgalactosaminidase	11.9515	12.438	12.8156	12.2525	12.1594	12.6991	12.6153	12.1054	12.439	0.0618944	0.927	0.0329202	0.0388368	0.786343	0.288957	0.539166	-0.378101	1.28857	0.160999	0.793178	0.416938
HSPA6	P17066	Heat shock 70 kDa protein 6	20.7745	20.9691	20.8619	20.8858	20.9942	20.7262	20.6942	21.046	20.7549	1.65784	0.0921439	1.03553	-0.218254	0.0184688	0.974453	0.0112391	0.00384458	2.03614	0.060413	1.21887	-0.222099
HMGA1	P17096	High mobility group protein HMG-I/HMG-Y	18.064	18.1747	18.2672	18.2246	18.0412	18.1872	18.1546	18.2011	18.1383	0.0440045	0.94316	0.0254148	0.00875219	0.345745	0.590692	0.228639	-0.0498498	0.398986	0.590379	0.228869	0.058602
TMEM11	P17152	Transmembrane protein 11, mitochondrial	18.2855	18.4417	18.4486	18.4446	18.2574	18.4568	18.2423	18.4594	18.4488	0.279688	0.689263	0.161615	-0.0620035	0.9679	0.219226	0.659107	-0.127238	0.431915	0.564638	0.24823	0.0652345
GOT1	P17174	Aspartate aminotransferase, cytoplasmic	22.2014	22.1556	22.2997	22.2014	22.1431	22.3009	22.1799	22.2065	22.2517	0.554378	0.460829	0.33646	0.025842	2.1465	0.042087	1.37585	-0.0898507	1.99206	0.0638904	1.19456	0.115693
PRKCA	P17252	Protein kinase C alpha type	19.1618	18.5731	19.0662	19.0519	18.527	19.1755	19.0733	18.6205	19.0452	3.57304	0.0108209	1.96574	0.522109	3.54482e-05	0.999918	3.54482e-05	5.72205e-06	3.37153	0.0166967	1.77737	0.522103
ITGA2	P17301	Integrin alpha-2	17.6063	17.3879	17.4538	17.6153	17.3753	17.4678	17.5401	17.4194	17.5413	2.68749	0.0261738	1.58213	0.193018	1.29601	0.133978	0.872966	0.0996017	1.44186	0.128947	0.889589	0.0934162
GJA1	P17302	Gap junction alpha-1 protein	17.8539	17.7318	17.8285	17.905	17.625	17.8754	17.9484	17.4659	17.9596	1.64243	0.0942504	1.02572	0.294841	0.112376	0.846488	0.0723792	0.0145899	1.50339	0.118951	0.924633	0.280251
UBTF	P17480	Nucleolar transcription factor 1	22.5862	22.6084	22.3605	22.5613	22.6265	22.3506	22.6179	22.3936	22.4961	0.233959	0.734126	0.134229	0.0455983	1.69759	0.0753209	1.12308	0.186029	0.728368	0.366199	0.436283	-0.14043
HOXB8	P17481	Homeobox protein Hox-B8;Homeobox protein Hox-C8	13.3819	13.4517	13.2597	13.2728	13.5297	13.2434	13.3201	13.3202	13.2224	0.724489	0.35671	0.447685	-0.108946	1.17123	0.160949	0.793311	0.0831175	1.43819	0.129565	0.887512	-0.192064
HOXB9	P17482	Homeobox protein Hox-B9	19.6942	19.6013	19.4548	19.6309	19.6254	19.4628	19.6097	19.6447	19.4969	0.302869	0.667983	0.175235	0.0210985	2.43408	0.0290205	1.5373	0.173417	2.97111	0.0226223	1.64546	-0.152318
HOXB6	P17509	Homeobox protein Hox-B6	17.0716	16.8089	16.8846	17.0835	16.6895	16.899	17.0548	16.6531	17.0019	2.7464	0.0248587	1.60452	0.352839	1.6955	0.0755036	1.12203	0.141496	1.61698	0.10295	0.987373	0.211343
NDUFB7	P17568	NADH dehydrogenase [ubiquinone] 1 beta subcomplex subunit 7	18.6185	18.5399	18.6847	18.6886	18.5521	18.5547	18.6842	18.5276	18.62	2.19114	0.0464488	1.33303	0.123905	0.428897	0.512999	0.289884	0.0439879	0.980808	0.250618	0.600987	0.0799166
PRKACA	P17612	cAMP-dependent protein kinase catalytic subunit alpha	20.4602	20.4835	20.6137	20.5328	20.3913	20.6534	20.5213	20.4267	20.6628	0.946235	0.258985	0.586725	0.0709267	2.15804	0.0416395	1.38049	-0.138536	2.61239	0.0322965	1.49084	0.209462
CAPN2	P17655	Calpain-2 catalytic subunit	20.2215	20.3148	20.329	20.208	20.2714	20.4251	20.2122	20.2498	20.4188	1.52919	0.111026	0.954577	-0.0647545	2.31697	0.0333068	1.47747	-0.177055	1.43213	0.130548	0.884229	0.1123
CEBPB	P17676	CCAAT/enhancer-binding protein beta	14.1	14.5041	14.225	14.021	14.5102	14.236	14.0102	14.5478	14.2131	3.95931	0.00847828	2.07169	-0.476984	2.47076	0.0275558	1.55979	-0.180994	4.39071	0.00977289	2.00998	-0.29599
GAP43	P17677	Neuromodulin	16.1479	15.9407	16.1442	15.9359	16.061	16.1612	16.2085	15.8334	16.1561	0.652723	0.397421	0.400749	0.152405	0.273043	0.660289	0.180266	-0.0563898	1.46901	0.124632	0.904371	0.208795
PTPN2	P17706	Tyrosine-protein phosphatase non-receptor type 2	17.7981	17.8281	17.7239	17.9078	17.7807	17.766	17.8158	17.8448	17.7635	0.227633	0.740695	0.130361	0.0227019	1.14861	0.166212	0.779338	0.0894451	1.32631	0.152706	0.816143	-0.0667432
AMD1	P17707	S-adenosylmethionine decarboxylase proenzyme;S-adenosylmethionine decarboxylase alpha chain;S-adenosylmethionine decarboxylase beta chain	12.3876	13.0884	10.9472	12.784	12.2935	11.2487	12.2032	12.0833	12.1598	0.0288699	0.964714	0.0156014	-0.0301272	1.17489	0.160029	0.795802	1.00639	1.02236	0.236235	0.626656	-1.03652
CTPS1	P17812	CTP synthase 1	22.9894	23.0029	22.9785	23.0516	22.9489	22.9717	22.9842	23.0266	22.9688	0.188984	0.782763	0.10637	0.0155996	0.743995	0.308993	0.510051	0.0354118	0.356063	0.628818	0.201475	-0.0198123
DDX5	P17844	Probable ATP-dependent RNA helicase DDX5	24.8601	24.8548	24.8282	24.8843	24.8444	24.8199	24.8841	24.8187	24.8386	1.28998	0.154756	0.810353	0.0368913	2.09056	0.045496	1.34203	0.0473022	0.361397	0.624275	0.204624	-0.0104109
PFKL	P17858	ATP-dependent 6-phosphofructokinase, liver type	21.1044	21.2253	21.0808	21.1882	21.1395	21.1148	21.1855	21.0952	21.1686	0.0435537	0.943657	0.0251857	0.00600942	0.432162	0.510235	0.29223	0.0379225	0.279222	0.70021	0.154772	-0.0319131
GM2A	P17900	Ganglioside GM2 activator;Ganglioside GM2 activator isoform short	18.0224	17.9533	18.5144	18.0788	17.9321	18.4331	18.014	18.1514	18.3434	0.13223	0.84559	0.0728403	0.0261389	2.73617	0.0213337	1.67093	-0.391884	2.09058	0.0563237	1.24931	0.418023
PSMC3	P17980	26S protease regulatory subunit 6A	23.0574	23.1671	23.1245	23.0323	23.1623	23.1533	23.0918	23.0866	23.165	1.1763	0.182764	0.738109	-0.0781924	1.84291	0.0622266	1.20602	-0.0871188	0.112724	0.869576	0.0606926	0.00892639
TCP1	P17987	T-complex protein 1 subunit alpha	24.3694	24.5079	24.5076	24.4281	24.4933	24.4649	24.392	24.5644	24.4493	1.97903	0.0596629	1.2243	-0.125326	1.47201	0.102012	0.99135	-0.0774225	0.796132	0.32964	0.48196	-0.0479031
PTPN1	P18031	Tyrosine-protein phosphatase non-receptor type 1	20.7874	20.8116	20.893	20.8978	20.7387	20.8602	20.8363	20.7456	20.9046	0.886465	0.282478	0.549015	0.0751883	0.585873	0.400677	0.397205	-0.0454547	1.96655	0.0659355	1.18088	0.120643
IGFBP2	P18065	Insulin-like growth factor-binding protein 2	16.3544	16.1159	16.1264	16.1528	16.1999	16.175	16.341	15.9381	16.1631	0.916356	0.271919	0.56556	0.198075	0.893597	0.244546	0.611639	0.127843	0.374935	0.612251	0.213071	0.0702327
ERCC2	P18074	TFIIH basal transcription factor complex helicase XPD subunit	19.1202	19.1856	18.9406	19.2222	19.131	18.8888	19.0976	19.1901	18.972	0.200323	0.77138	0.112732	-0.0222359	2.02919	0.0491844	1.30817	0.212859	2.80125	0.0271482	1.56626	-0.235095
RPL35A	P18077	60S ribosomal protein L35a	22.391	22.4088	22.3374	22.4227	22.321	22.2821	22.4026	22.4327	22.3286	0.19626	0.776261	0.109992	0.0179793	1.99263	0.0511861	1.29085	0.0894114	0.873664	0.291103	0.535954	-0.0714321
ITGB5	P18084	Integrin beta-5	15.3976	15.6102	14.4439	14.9111	15.0096	15.2405	14.9465	15.4308	14.8351	0.486627	0.508516	0.293696	-0.265101	0.36872	0.570025	0.244106	0.24526	0.812118	0.320796	0.493771	-0.510361
ARF4	P18085	ADP-ribosylation factor 4	19.9578	20.2138	20.3414	20.2029	20.0357	20.2519	19.8994	20.1973	20.3516	0.519611	0.486251	0.31314	-0.128894	1.39983	0.114102	0.942708	-0.294927	1.1997	0.182823	0.73797	0.166033
RPL7	P18124	60S ribosomal protein L7	24.9785	24.9645	24.8819	24.9852	24.9596	24.9105	24.9599	24.9161	24.9528	0.74477	0.346142	0.460745	0.0277958	1.27303	0.138575	0.858315	0.0594845	0.545448	0.479624	0.319099	-0.0316887
VCL	P18206	Vinculin	22.394	22.5129	22.5407	22.3659	22.4974	22.5871	22.3762	22.5202	22.5494	3.61131	0.0106131	1.97416	-0.131496	3.40567	0.011994	1.92103	-0.180389	1.44219	0.128913	0.889704	0.048893
PTPRA	P18433	Receptor-type tyrosine-protein phosphatase alpha	15.4882	15.7667	15.651	15.4523	15.7387	15.7409	15.682	15.4576	15.855	0.393579	0.583178	0.234199	-0.113489	1.05645	0.191803	0.717144	-0.208118	0.340347	0.642067	0.19242	0.094629
NAT1	P18440	Arylamine N-acetyltransferase 1	15.333	15.4588	15.4013	15.253	15.4788	15.1043	15.1816	15.4126	15.3995	1.81143	0.0745353	1.12764	-0.19422	0.159302	0.788352	0.10328	-0.0458393	0.668922	0.398727	0.399324	-0.148381
SON	P18583	Protein SON	21.4066	21.3943	21.4342	21.372	21.4145	21.4533	21.4094	21.3514	21.4477	0.156142	0.817267	0.0876363	0.00924619	1.67928	0.0770537	1.11321	-0.0491244	1.39801	0.137243	0.862509	0.0583706
NELFE	P18615	Negative elongation factor E	20.3309	20.2682	20.2153	20.2338	20.2747	20.315	20.3437	20.2439	20.2508	0.491603	0.504937	0.296763	0.0405299	0.396157	0.54344	0.264849	0.0424875	0.0213021	0.973767	0.0115451	-0.00195758
RPL17	P18621	60S ribosomal protein L17	23.56	23.6244	23.4856	23.5183	23.6852	23.4403	23.6229	23.3235	23.6572	0.0683374	0.918874	0.0367441	0.0226733	0.209798	0.731089	0.13603	0.0393715	0.0438844	0.948231	0.0230859	-0.0166982
PGAM1	P18669	Phosphoglycerate mutase 1	23.5274	23.7577	23.5028	23.485	23.7634	23.5068	23.6371	23.4913	23.6022	0.529525	0.479069	0.319602	-0.120937	0.0795348	0.892541	0.049372	0.012572	0.62987	0.422517	0.374155	-0.133509
RCC1	P18754	Regulator of chromosome condensation	22.8226	22.7399	22.7324	22.7815	22.7326	22.7799	22.8128	22.7361	22.7475	2.27822	0.0421574	1.37513	0.0694256	1.31061	0.131013	0.882684	0.0523701	0.530273	0.490662	0.309217	0.0170555
SDC1	P18827	Syndecan-1	15.1582	14.9947	14.5566	15.1455	14.8237	14.6933	15.1473	14.7526	14.7594	1.81958	0.0738675	1.13155	0.293368	2.88416	0.0184983	1.73287	0.480588	0.936869	0.268073	0.571747	-0.18722
ATF1	P18846	Cyclic AMP-dependent transcription factor ATF-1	15.1544	14.92	15.1949	15.2491	14.9339	15.2507	15.188	14.9377	15.0845	3.15541	0.016699	1.77731	0.266629	0.134177	0.818755	0.0868463	0.0204417	2.12881	0.0538362	1.26893	0.246188
ATF3	P18847	Cyclic AMP-dependent transcription factor ATF-3	16.8346	16.9158	17.0474	16.5388	17.0295	17.1477	16.6778	16.8653	17.1294	1.21053	0.173398	0.760955	-0.253151	2.02249	0.0496165	1.30437	-0.424449	1.38913	0.138772	0.857697	0.171298
LIG1	P18858	DNA ligase 1	21.0307	21.3849	21.3065	21.0119	21.4086	21.2889	21.1365	21.2258	21.3443	1.80776	0.0749325	1.12533	-0.280064	2.41715	0.0294583	1.53079	-0.253506	0.167871	0.811545	0.0906876	-0.0265579
ATP5J	P18859	ATP synthase-coupling factor 6, mitochondrial	21.6634	21.4181	21.7401	21.4702	21.6008	21.6805	21.5721	21.5541	21.7013	0.220477	0.749161	0.125425	0.0442295	1.11618	0.174444	0.758343	-0.138747	1.47472	0.123835	0.907156	0.182976
XRCC1	P18887	DNA repair protein XRCC1	19.2849	19.3093	19.3429	19.3389	19.3414	19.2229	19.401	19.2211	19.3225	0.445647	0.538642	0.2687	0.0510076	0.382677	0.556793	0.254307	0.045503	0.0360813	0.957433	0.0188916	0.00550461
CDH2	P19022	Cadherin-2	19.6865	19.6493	19.535	19.6058	19.6227	19.6289	19.6722	19.5547	19.6268	0.538977	0.471227	0.32677	0.0459023	0.660869	0.353831	0.451204	0.0579274	0.103378	0.880829	0.0551084	-0.0120252
GNAZ	P19086	Guanine nucleotide-binding protein G(z) subunit alpha	13.4113	13.6028	13.7019	13.3239	13.5648	13.7491	13.3026	13.7614	13.8131	1.90476	0.0656906	1.1825	-0.297045	3.04231	0.0167579	1.77578	-0.408769	0.751787	0.353113	0.452086	0.111725
MYL12A	P19105	Myosin regulatory light chain 12A;Myosin regulatory light chain 12B;Myosin regulatory light polypeptide 9	21.6577	21.6596	21.5849	21.6795	21.6504	21.5611	21.6965	21.5379	21.6597	0.693197	0.373815	0.427343	0.0619253	1.12577	0.171679	0.765284	0.0760066	0.103193	0.880829	0.0551084	-0.0140813
PLCG1	P19174	1-phosphatidylinositol 4,5-bisphosphate phosphodiesterase gamma-1	20.7782	20.8327	20.8452	20.8323	20.8388	20.8138	20.8335	20.8018	20.8331	0.171784	0.800768	0.0964933	-0.00977453	0.322037	0.614341	0.211591	-0.0160007	0.159377	0.819315	0.0865491	0.00622622
CD58	P19256	Lymphocyte function-associated antigen 3	14.573	14.5053	14.2484	14.5507	14.5051	14.4436	14.4808	14.4388	14.5768	0.659918	0.393186	0.405402	0.0517267	0.490885	0.465864	0.33174	0.11189	0.242546	0.738404	0.131706	-0.0601638
NCL	P19338	Nucleolin	25.7137	25.708	25.6097	25.635	25.7424	25.6514	25.789	25.4521	25.7549	0.315191	0.654358	0.184185	0.0784302	0.260957	0.673761	0.171494	0.0405725	0.13824	0.842389	0.0744872	0.0378577
HK1	P19367	Hexokinase-1	22.5219	22.5568	22.6422	22.5533	22.5022	22.6652	22.5112	22.5557	22.6542	0.160447	0.813647	0.0895638	-0.00939941	3.03055	0.0168674	1.77295	-0.125022	2.41643	0.0402168	1.39559	0.115622
POLR2C	P19387	DNA-directed RNA polymerase II subunit RPB3	20.0059	19.9476	19.9232	19.9975	20.0044	19.8804	20.0692	19.7186	20.0494	0.674509	0.383979	0.415692	0.134015	0.58895	0.398613	0.399448	0.0732358	0.236771	0.742895	0.129072	0.0607789
POLR2E	P19388	DNA-directed RNA polymerases I, II, and III subunit RPABC1	20.8854	20.9448	20.911	20.9372	20.955	20.8638	20.9043	20.9453	20.9015	1.19459	0.177971	0.749651	-0.0393747	0.332911	0.604019	0.218949	0.0168705	1.72107	0.0903487	1.04408	-0.0562452
NDUFV2	P19404	NADH dehydrogenase [ubiquinone] flavoprotein 2, mitochondrial	20.3248	20.252	19.9276	20.3117	20.2449	19.9533	20.3202	20.2406	20.0004	3.86933	0.00850314	2.07042	0.0730934	4.10848	0.00667471	2.17557	0.358484	3.72505	0.0128798	1.89009	-0.28539
ELK1	P19419	ETS domain-containing protein Elk-1	14.2975	14.3563	13.8804	13.9494	14.3492	14.2727	14.1158	14.3003	13.9882	0.984654	0.242841	0.614678	-0.21437	0.182301	0.761242	0.118477	0.073829	1.14544	0.197515	0.704399	-0.288199
ERCC3	P19447	TFIIH basal transcription factor complex helicase XPB subunit	19.1489	19.2076	19.1855	19.1987	19.1694	19.1747	19.1228	19.2261	19.1725	0.727671	0.355524	0.449131	-0.0442371	0.386252	0.553485	0.256894	-0.0207717	0.613797	0.433841	0.362669	-0.0234655
TRIM21	P19474	E3 ubiquitin-protein ligase TRIM21	14.9165	14.7804	14.7132	14.9035	14.622	14.8409	14.7127	14.87	14.8121	0.37061	0.603261	0.219495	0.0867472	0.294107	0.639342	0.194267	0.0554635	0.140972	0.839566	0.0759449	0.0312837
EIF2AK2	P19525	Interferon-induced, double-stranded RNA-activated protein kinase	19.969	20.0595	20.0248	19.9705	20.006	20.057	19.9509	20.0141	20.0604	1.62086	0.0971285	1.01265	-0.0630525	2.53442	0.0254301	1.59465	-0.0839087	0.445317	0.554177	0.256351	0.0208562
EN2	P19622	Homeobox protein engrailed-2	14.0645	14.0137	13.655	13.5991	14.0983	14.1187	14.2168	13.3114	14.0301	0.187152	0.784689	0.105302	0.152328	0.0369741	0.946605	0.0238314	0.0255162	0.166555	0.812641	0.0901013	0.126812
SRM	P19623	Spermidine synthase	21.3664	21.6394	21.5338	21.4704	21.581	21.49	21.4015	21.6152	21.5434	2.32866	0.0397715	1.40043	-0.199113	1.46543	0.10304	0.986993	-0.109615	1.71514	0.0911486	1.04025	-0.0894972
CSNK2A2	P19784	Casein kinase II subunit alpha	21.2876	21.4628	21.4275	21.2972	21.4226	21.4592	21.378	21.2587	21.5215	0.368129	0.605391	0.217964	-0.060468	1.69338	0.0756995	1.12091	-0.148492	0.574	0.458908	0.338274	0.0880241
RXRA	P19793	Retinoic acid receptor RXR-alpha;Retinoic acid receptor RXR-gamma	15.1722	15.1079	15.0236	15.0611	14.9824	15.2765	15.1413	15.2612	14.8591	0.0297172	0.963253	0.0162597	0.00769774	0.222771	0.715655	0.145296	0.0718034	0.165765	0.813168	0.08982	-0.0641057
NFKB1	P19838	Nuclear factor NF-kappa-B p105 subunit;Nuclear factor NF-kappa-B p50 subunit	18.9345	18.9856	18.9225	18.9506	18.9169	18.984	18.897	19.0642	18.9243	0.607497	0.424536	0.372086	-0.0615444	0.250453	0.685048	0.164279	-0.0162252	0.408318	0.582783	0.234493	-0.0453192
ATP2B1	P20020	Plasma membrane calcium-transporting ATPase 1	20.0006	19.8115	19.823	19.9946	19.7739	19.8471	19.9742	19.8055	19.8343	3.77532	0.009294	2.0318	0.192815	3.8966	0.00792475	2.10101	0.155031	1.30269	0.157861	0.801726	0.0377833
EIF2S2	P20042	Eukaryotic translation initiation factor 2 subunit 2	22.2437	22.3727	22.2664	22.1772	22.3567	22.2729	22.2329	22.2692	22.3526	1.40147	0.132851	0.876634	-0.114934	1.08068	0.18459	0.733791	-0.0793851	0.347181	0.636445	0.196239	-0.0355492
ANXA7	P20073	Annexin A7	20.8008	21.0699	20.9889	20.9065	20.9828	20.9524	20.804	21.1031	20.9378	1.89929	0.0662837	1.17859	-0.214823	1.49795	0.0979173	1.00914	-0.122607	1.11324	0.206265	0.685575	-0.0922165
TBP	P20226	TATA-box-binding protein;TATA box-binding protein-like protein 2	17.0235	17.1406	17.0149	17.0706	17.0266	17.1325	17.122	17.2308	17.1354	0.389938	0.586105	0.232025	-0.060648	0.172236	0.772546	0.112076	-0.0222403	0.208883	0.768085	0.114591	-0.0384076
CCNA2	P20248	Cyclin-A2	18.2751	18.3266	18.1294	18.1915	18.2945	18.2042	18.1465	18.3893	18.0755	1.32328	0.147496	0.83122	-0.132448	0.569945	0.4126	0.384471	0.0679715	1.89986	0.0711958	1.14755	-0.20042
POU3F2	P20265	POU domain, class 3, transcription factor 2	15.2601	15.2982	15.5313	15.2984	15.2465	15.5202	15.2621	15.518	15.4185	0.406673	0.57158	0.242923	-0.0806888	2.32833	0.0329153	1.4826	-0.216453	0.680665	0.392081	0.406624	0.135764
BTF3	P20290	Transcription factor BTF3	21.7739	21.7635	21.9692	21.9112	21.7788	21.7887	21.8958	21.8642	21.7906	0.470168	0.520512	0.283569	0.0581398	0.050196	0.928371	0.0322784	0.0108096	0.282135	0.697095	0.156708	0.0473302
RAB3A	P20336	Ras-related protein Rab-3A	16.4988	16.2481	16.8916	16.5704	16.0357	16.9706	16.6044	16.1821	16.8513	2.34243	0.0392787	1.40584	0.402577	2.74885	0.0210644	1.67645	-0.346591	3.31972	0.0172135	1.76413	0.749168
RAB3B	P20337	Ras-related protein Rab-3B	15.3367	15.1128	15.4821	15.4171	15.0617	15.4696	15.3137	15.1034	15.5782	2.77358	0.0240618	1.61867	0.26321	1.53078	0.093284	1.03019	-0.154139	3.42075	0.0159368	1.7976	0.417349
RAB4A	P20338	Ras-related protein Rab-4A	19.3424	19.4843	19.4879	19.4052	19.3984	19.4926	19.3292	19.5609	19.4251	1.09631	0.206129	0.685861	-0.122286	1.57562	0.0883002	1.05404	-0.109624	0.086913	0.899998	0.0457584	-0.0126623
RAB5A	P20339	Ras-related protein Rab-5A	18.6156	18.7498	18.6895	18.6317	18.7123	18.7054	18.6008	18.6945	18.7373	2.28218	0.0418688	1.37811	-0.102809	2.3274	0.0329153	1.4826	-0.0946757	0.139958	0.840597	0.0754123	-0.00813293
RAB6A	P20340	Ras-related protein Rab-6A	21.5799	21.7853	21.8147	21.6422	21.7099	21.8233	21.5617	21.8488	21.7802	1.78335	0.077564	1.11034	-0.186696	2.80177	0.0201541	1.69564	-0.211444	0.229514	0.748672	0.125708	0.0247485
MSH3	P20585	DNA mismatch repair protein Msh3	19.7241	19.7709	19.7624	19.72	19.7339	19.8097	19.6884	19.79	19.7826	1.27116	0.159115	0.798288	-0.0540892	1.85381	0.0612524	1.21288	-0.0740534	0.393582	0.594679	0.225717	0.0199642
PSMB1	P20618	Proteasome subunit beta type-1	21.6482	21.7192	21.6822	21.6417	21.7015	21.6953	21.6698	21.7	21.6773	2.16191	0.0477924	1.32064	-0.0536734	1.46574	0.103031	0.98703	-0.0316855	1.26013	0.167402	0.776239	-0.0219879
M6PR	P20645	Cation-dependent mannose-6-phosphate receptor	19.5481	19.5886	19.2829	19.4829	19.579	19.3427	19.4853	19.529	19.3883	0.997855	0.238236	0.622993	-0.0601088	1.96406	0.0532061	1.27404	0.167479	2.50809	0.035662	1.44779	-0.227588
COX5A	P20674	Cytochrome c oxidase subunit 5A, mitochondrial	21.5195	21.2107	21.2839	21.4122	21.3777	21.1421	21.4737	21.0351	21.4461	1.18174	0.181395	0.741375	0.260617	0.889646	0.246029	0.609013	0.1778	0.247801	0.733517	0.13459	0.0828171
LMNB1	P20700	Lamin-B1	24.3462	24.3514	24.3739	24.3332	24.4141	24.3441	24.3759	24.3075	24.3705	0.06107	0.927512	0.0326804	-0.00588099	0.281868	0.650859	0.186513	-0.0110391	0.0550588	0.934949	0.029212	0.00515811
HOXA5	P20719	Homeobox protein Hox-A5	13.9888	13.8845	13.9665	13.8222	14.0287	13.9696	13.8241	14.0527	13.8943	0.654802	0.39597	0.402338	-0.11027	0.465819	0.484727	0.314502	-0.0651099	0.319083	0.661089	0.17974	-0.0451597
CAST	P20810	Calpastatin	19.9953	19.8749	19.686	19.8438	19.9053	19.779	19.9795	19.6923	19.8395	0.633586	0.408913	0.388369	0.11539	1.22687	0.148347	0.828722	0.171403	0.281494	0.697602	0.156392	-0.0560131
IMPDH1	P20839	Inosine-5-monophosphate dehydrogenase 1	20.3071	20.5187	20.3042	20.4252	20.463	20.1902	20.399	20.3962	20.2132	0.750054	0.344135	0.463271	-0.0822334	1.32322	0.128608	0.890732	0.141207	1.96538	0.0659993	1.18046	-0.22344
COL5A1	P20908	Collagen alpha-1(V) chain	12.3574	11.8656	12.5783	11.8616	11.8179	12.9661	12.2843	12.0628	12.4038	0.666127	0.389375	0.409632	0.252345	0.995458	0.210386	0.676984	-0.481641	1.80199	0.0810132	1.09144	0.733986
AGA	P20933	N(4)-(beta-N-acetylglucosaminyl)-L-asparaginase;Glycosylasparaginase alpha chain;Glycosylasparaginase beta chain	17.0722	17.4256	17.4629	17.1247	17.3796	17.4415	17.1441	17.365	17.3898	3.21631	0.0158314	1.80048	-0.276419	3.31708	0.0132317	1.87838	-0.317766	0.660303	0.403857	0.393772	0.0413469
RASA1	P20936	Ras GTPase-activating protein 1	16.7573	17.1671	16.8875	16.8225	17.1166	16.8812	16.7411	17.0617	16.9919	3.01528	0.0185571	1.73149	-0.341495	1.5471	0.0914718	1.03871	-0.1466	1.84337	0.0764649	1.11654	-0.194895
PTMS	P20962	Parathymosin	20.0792	19.9734	19.9498	19.9221	20.0994	20.0367	20.048	19.9352	19.9999	0.0695345	0.917454	0.0374155	0.0137291	0.143278	0.809601	0.0917288	0.0209376	0.0442456	0.94807	0.0231598	-0.00720851
CDK11B	P21127	Cyclin-dependent kinase 11B	20.4996	20.5753	20.6581	20.5223	20.634	20.5798	20.503	20.5883	20.6582	2.04749	0.0547889	1.26131	-0.0909081	1.99073	0.0513453	1.2895	-0.123748	0.447005	0.552729	0.257487	0.0328395
GSTM3	P21266	Glutathione S-transferase Mu 3	20.9945	21.0551	21.3469	21.2438	20.905	21.2376	21.035	21.0422	21.3088	0.42373	0.55722	0.253973	0.0903269	1.16191	0.162858	0.788192	-0.206659	2.1694	0.0517186	1.28635	0.296986
ATP6V1B2	P21281	V-type proton ATPase subunit B, brain isoform	20.9075	20.9955	21.059	20.9618	20.9839	21.0214	21.032	20.9104	21.0476	0.0290528	0.964448	0.0157212	0.00387383	0.936201	0.229762	0.638721	-0.0755437	1.2894	0.160905	0.793432	0.0794175
ATP6V1C1	P21283	V-type proton ATPase subunit C 1	20.754	20.8312	20.9578	20.9161	20.7107	20.8812	20.7245	20.9176	20.8881	0.0910212	0.891525	0.0498667	-0.021602	0.795138	0.284895	0.545315	-0.110839	0.618896	0.430287	0.366242	0.0892366
FLNA	P21333	Filamin-A	23.0218	23.4805	23.4257	22.9858	23.4564	23.4457	23.0755	23.3456	23.4715	2.90934	0.0209285	1.67926	-0.399771	3.86452	0.00797344	2.09835	-0.419897	0.174979	0.803768	0.094869	0.0201263
NF1	P21359	Neurofibromin;Neurofibromin truncated	18.2209	18.383	18.3682	18.2968	18.2176	18.4229	18.1489	18.4353	18.3841	0.718982	0.359636	0.444137	-0.123083	1.68521	0.0764292	1.11674	-0.169516	0.275776	0.703549	0.152706	0.0464331
ACO1	P21399	Cytoplasmic aconitate hydratase	21.2491	21.189	21.5199	21.2869	21.1333	21.5168	21.2038	21.3066	21.4429	0.26102	0.708314	0.149774	0.0369581	2.67987	0.022365	1.65043	-0.246622	2.11981	0.054409	1.26433	0.28358
TAF1	P21675	Transcription initiation factor TFIID subunit 1;Transcription initiation factor TFIID subunit 1-like	15.7471	15.563	15.5877	15.6474	15.5245	15.8057	15.6632	15.5274	15.8014	1.94217	0.0624033	1.20479	0.14759	0.228706	0.70892	0.149403	-0.0457306	1.24338	0.171197	0.766504	0.19332
MDK	P21741	Midkine	18.436	19.2254	18.3962	18.2969	19.1909	18.4043	18.7189	18.7683	18.5158	1.39965	0.133263	0.87529	-0.577585	0.127349	0.826371	0.0828249	0.0451565	1.82782	0.0779668	1.10809	-0.622742
VDAC1	P21796	Voltage-dependent anion-selective channel protein 1	23.6151	23.707	23.6482	23.7055	23.6151	23.6393	23.7148	23.4757	23.7794	0.459789	0.528576	0.276892	0.0792166	0.0662706	0.909328	0.0412794	-0.0105216	0.480866	0.526268	0.278793	0.0897382
SDHB	P21912	Succinate dehydrogenase [ubiquinone] iron-sulfur subunit, mitochondrial	21.6595	21.561	21.2268	21.6076	21.5662	21.2132	21.625	21.5398	21.2627	1.91429	0.0647999	1.18843	0.0750561	4.31625	0.00592863	2.22705	0.396516	4.35398	0.00977289	2.00998	-0.32146
CD9	P21926	CD9 antigen	17.1512	17.3458	17.471	17.2619	17.2429	17.538	17.3918	17.2828	17.5417	0.105778	0.875906	0.0575427	-0.0222136	1.56187	0.0898175	1.04664	-0.248592	2.40972	0.0403956	1.39367	0.226378
BCKDHB	P21953	2-oxoisovalerate dehydrogenase subunit beta, mitochondrial	17.4793	17.6812	17.8575	17.4496	17.5857	17.9044	17.6036	17.5089	17.8941	0.518957	0.486653	0.312781	-0.0811075	2.79361	0.0202458	1.69367	-0.374472	2.31853	0.044087	1.35569	0.293365
COMT	P21964	Catechol O-methyltransferase	20.819	21.1662	21.1836	20.8309	21.2183	21.0659	20.8531	21.0267	21.2445	2.19011	0.0465116	1.33244	-0.302738	2.46033	0.027906	1.5543	-0.33034	0.130756	0.850659	0.0702446	0.0276025
TGM2	P21980	Protein-glutamine gamma-glutamyltransferase 2	16.541	16.1444	16.1818	16.605	15.9689	16.2955	16.4591	16.0625	16.3837	2.70999	0.0256473	1.59096	0.476387	1.58026	0.0877305	1.05685	0.247994	1.37821	0.141187	0.850207	0.228393
MUT	P22033	Methylmalonyl-CoA mutase, mitochondrial	20.5346	20.5068	20.7587	20.5189	20.4352	20.8134	20.546	20.4914	20.7693	1.12605	0.19698	0.705579	0.0553474	3.74087	0.0089245	2.04942	-0.247285	3.41406	0.0159368	1.7976	0.302633
OSBP	P22059	Oxysterol-binding protein 1	21.8472	21.8948	21.8442	21.8416	21.8908	21.8946	21.859	21.8553	21.8944	1.07467	0.212964	0.671694	-0.0310287	0.746215	0.307789	0.511747	-0.0285034	0.0410187	0.950782	0.0219189	-0.00252533
PCMT1	P22061	Protein-L-isoaspartate(D-aspartate) O-methyltransferase	21.6616	21.8539	21.891	21.6914	21.8576	21.8301	21.7306	21.7388	21.9608	1.30664	0.150985	0.821067	-0.122235	2.0207	0.0496165	1.30437	-0.199416	0.641639	0.415228	0.381713	0.0771809
FBL	P22087	rRNA 2-O-methyltransferase fibrillarin	22.7333	22.6952	22.6459	22.6828	22.6743	22.722	22.7726	22.5199	22.7836	0.750005	0.344135	0.463271	0.0997823	0.0933848	0.874119	0.0584292	0.0124416	0.569841	0.461426	0.335898	0.0873407
GART	P22102	Trifunctional purine biosynthetic protein adenosine-3;Phosphoribosylamine--glycine ligase;Phosphoribosylformylglycinamidine cyclo-ligase;Phosphoribosylglycinamide formyltransferase	23.8475	23.9317	24.0244	23.9201	23.9392	23.965	23.8762	24.015	23.9307	1.11734	0.199566	0.699914	-0.0807215	1.2511	0.14278	0.845332	-0.0921122	0.10775	0.875705	0.0576423	0.0113907
PAICS	P22234	Multifunctional protein ADE2;Phosphoribosylaminoimidazole-succinocarboxamide synthase;Phosphoribosylaminoimidazole carboxylase	24.6567	24.7627	24.6618	24.6458	24.7502	24.7305	24.6963	24.6881	24.7218	1.14314	0.191649	0.717493	-0.0673593	0.655539	0.357761	0.446407	-0.038393	0.385814	0.602171	0.22028	-0.0289663
SCP2	P22307	Non-specific lipid-transfer protein	22.321	22.3257	22.3717	22.3114	22.3212	22.4162	22.341	22.3303	22.3678	0.0492229	0.938648	0.0274973	-0.0013059	1.57099	0.0888717	1.05124	-0.0608273	1.7119	0.0912537	1.03975	0.0595214
UBA1	P22314	Ubiquitin-like modifier-activating enzyme 1	24.747	24.7922	24.833	24.7324	24.7949	24.8368	24.7718	24.7776	24.8427	1.39303	0.13429	0.871956	-0.0378482	2.74401	0.0212155	1.67335	-0.0870794	2.90352	0.024116	1.6177	0.0492312
NME2	P22392	Nucleoside diphosphate kinase B;Putative nucleoside diphosphate kinase	24.4279	24.5452	24.4857	24.5288	24.4694	24.4646	24.43	24.5579	24.4543	0.646588	0.401229	0.396607	-0.0619253	0.0597778	0.91692	0.0376685	-0.0059611	0.895762	0.282794	0.54853	-0.0559642
ENPP1	P22413	Ectonucleotide pyrophosphatase/phosphodiesterase family member 1;Alkaline phosphodiesterase I;Nucleotide pyrophosphatase	17.9246	17.9309	17.8856	17.8821	17.9595	17.9297	17.8803	17.9306	17.9502	1.20923	0.173707	0.760184	-0.0446771	0.474207	0.478858	0.319793	-0.0261726	0.361795	0.623954	0.204847	-0.0185045
USF1	P22415	Upstream stimulatory factor 1	17.6964	17.5518	17.5547	17.4921	17.4979	17.682	17.6463	17.4545	17.5496	0.748266	0.344714	0.462541	0.11016	0.0753609	0.898157	0.0466477	0.0161241	0.845784	0.304532	0.516367	0.0940361
GAL	P22466	Galanin peptides;Galanin;Galanin message-associated peptide	14.4533	14.2971	14.286	14.5545	14.0442	14.0422	14.387	14.3876	14.1952	0.911363	0.273649	0.562806	0.222002	1.55201	0.0909388	1.04125	0.290495	0.212653	0.764528	0.116606	-0.0684929
HIST1H1T	P22492	Histone H1t	15.8846	15.9471	15.7979	15.9412	15.9069	15.7749	15.8989	15.7406	15.9795	0.264494	0.704829	0.151916	0.0433604	0.357824	0.579728	0.236776	0.0574888	0.0538127	0.935912	0.0287648	-0.0141284
FDXR	P22570	NADPH:adrenodoxin oxidoreductase, mitochondrial	20.1886	20.0062	20.1734	20.1907	19.9975	20.2464	20.1538	20.009	20.1975	3.81112	0.00922082	2.03523	0.173471	0.498116	0.460422	0.336843	-0.0280679	3.12087	0.0192321	1.71597	0.201539
HNRNPA2B1	P22626	Heterogeneous nuclear ribonucleoproteins A2/B1	24.9254	25.0991	25.0299	24.9206	25.1511	24.9401	25.0674	24.6523	25.2757	0.00720134	0.991226	0.00382728	0.00362841	0.424958	0.516962	0.286541	-0.110757	0.240621	0.74001	0.130762	0.114385
RFX1	P22670	MHC class II regulatory factor RFX1	18.3159	18.0857	18.1295	18.2026	18.1094	18.268	18.243	18.2431	18.0949	0.845434	0.300698	0.52187	0.107752	0.649478	0.360982	0.442515	0.0896695	0.0892043	0.897299	0.0470627	0.0180823
CBL	P22681	E3 ubiquitin-protein ligase CBL	19.2196	19.0947	19.1441	19.1353	19.1005	19.2224	19.1538	19.1227	19.1786	1.10827	0.202288	0.69403	0.0635586	0.130619	0.822736	0.0847395	-0.012146	1.45222	0.127054	0.89601	0.0757046
PRKACB	P22694	cAMP-dependent protein kinase catalytic subunit beta	15.5316	15.616	15.5848	15.5779	15.5638	15.5296	15.0558	15.9443	15.5297	0.712305	0.363188	0.439868	-0.31959	0.402811	0.537116	0.269932	-0.15959	0.593616	0.446309	0.350364	-0.16
UQCRC2	P22695	Cytochrome b-c1 complex subunit 2, mitochondrial	22.2344	22.2528	22.0537	22.2479	22.235	22.0673	22.2383	22.2164	22.0949	0.185467	0.786746	0.104166	0.00546201	3.71915	0.00911291	2.04034	0.168234	3.2759	0.0179141	1.74681	-0.162772
FECH	P22830	Ferrochelatase, mitochondrial	19.8641	20.0473	19.2809	19.9764	19.9667	19.2081	19.801	20.0516	19.3498	1.14114	0.192218	0.716205	-0.141348	3.10269	0.0163482	1.78653	0.600881	3.94353	0.0119906	1.92116	-0.742229
XPA	P23025	DNA repair protein complementing XP-A cells	16.9714	16.983	16.804	16.8677	16.95	17.001	17.0482	16.8385	16.9501	0.220687	0.749024	0.125504	0.0385831	0.217262	0.72188	0.141535	0.0440356	0.0248524	0.969603	0.0134059	-0.00545247
FBLN1	P23142	Fibulin-1	13.2969	12.3742	13.4096	13.3432	12.2739	13.4057	12.5034	13.2225	13.0576	0.449831	0.536539	0.270399	0.424292	0.338955	0.597587	0.223599	-0.24314	0.968781	0.255249	0.593036	0.667432
TCEA1	P23193	Transcription elongation factor A protein 1	21.5594	21.4733	21.4926	21.4468	21.5284	21.4982	21.5402	21.4773	21.465	0.225173	0.743445	0.128751	0.0224953	0.345671	0.590692	0.228639	0.0302404	0.139841	0.840642	0.0753887	-0.00774511
ITGA6	P23229	Integrin alpha-6;Integrin alpha-6 heavy chain;Integrin alpha-6 light chain;Processed integrin alpha-6	16.5174	16.3741	16.3813	16.4676	16.335	16.5083	16.5016	16.3548	16.4532	2.79441	0.0237868	1.62366	0.140904	0.533392	0.436873	0.359645	0.0479215	1.13652	0.199831	0.699338	0.0929826
SFPQ	P23246	Splicing factor, proline- and glutamine-rich	24.1136	24.2138	24.0323	24.0998	24.2401	24.0259	24.1429	24.1216	24.0861	0.894188	0.279626	0.553423	-0.0731068	1.43215	0.108524	0.964475	0.0706228	1.61641	0.102997	0.987177	-0.14373
TUBG1	P23258	Tubulin gamma-1 chain;Tubulin gamma-2 chain	21.0226	21.0746	20.9759	21.0353	21.0357	21.0149	21.0813	20.8854	21.0998	0.325601	0.644342	0.190884	0.0478395	0.147985	0.803037	0.0952647	0.0161826	0.175789	0.802951	0.095311	0.0316569
PPIB	P23284	Peptidyl-prolyl cis-trans isomerase B	23.7476	23.8435	23.9134	23.7769	23.8044	23.9051	23.801	23.8009	23.8924	0.931599	0.265048	0.576675	-0.0410773	2.82183	0.0198487	1.70227	-0.128456	2.36982	0.0421537	1.37516	0.0873788
ME2	P23368	NAD-dependent malic enzyme, mitochondrial	21.0203	21.0405	21.0836	21.0409	20.9887	21.1074	21.0211	21.046	21.0888	0.0416263	0.945828	0.024188	0.00238101	2.57574	0.0243752	1.61305	-0.0658398	1.59252	0.106406	0.973034	0.0682208
GLDC	P23378	Glycine dehydrogenase (decarboxylating), mitochondrial	18.8985	18.9087	18.9049	18.821	18.8174	18.9943	18.8011	18.834	18.9806	0.117133	0.860929	0.0650327	-0.0131626	1.37411	0.118833	0.925064	-0.119744	1.26548	0.16585	0.780284	0.106581
WARS	P23381	Tryptophan--tRNA ligase, cytoplasmic;T1-TrpRS;T2-TrpRS	22.55	22.8314	22.8259	22.544	22.8232	22.8244	22.579	22.8297	22.7911	4.77308	0.00686933	2.16309	-0.270427	4.08287	0.00675472	2.17039	-0.25613	0.542366	0.481128	0.31774	-0.0142968
RPS3	P23396	40S ribosomal protein S3	24.7005	24.7689	24.7325	24.7854	24.7331	24.6991	24.6876	24.8507	24.7074	0.572802	0.448077	0.348647	-0.0597261	0.131156	0.822162	0.0850426	0.0115115	0.918248	0.274459	0.561523	-0.0712376
GCSH	P23434	Glycine cleavage system H protein, mitochondrial	19.4346	19.2896	19.4522	19.3953	19.2608	19.5109	19.4005	19.2287	19.5443	2.66128	0.0269334	1.56971	0.150456	1.44845	0.105608	0.976304	-0.0923506	2.7823	0.0277752	1.55634	0.242807
RPS6KB1	P23443	Ribosomal protein S6 kinase beta-1	18.8931	18.9786	18.9119	18.8459	18.9191	19.0026	18.9525	18.8213	19.008	0.0572809	0.930894	0.0310998	-0.009154	0.813259	0.27671	0.557975	-0.0770334	0.540764	0.482223	0.316752	0.0678794
JAK1	P23458	Tyrosine-protein kinase JAK1	16.7729	16.7173	16.8105	16.7355	16.8245	16.7757	16.6736	16.7928	16.8067	0.520061	0.485967	0.313393	-0.050902	1.06716	0.188697	0.724234	-0.0703316	0.225887	0.752584	0.123445	0.0194295
PTPRG	P23470	Receptor-type tyrosine-protein phosphatase gamma	14.9639	14.8077	14.927	14.8928	14.9497	15.1202	14.9068	14.9107	15.0699	0.267038	0.702376	0.15343	0.031812	0.888782	0.246036	0.609001	-0.117876	0.978178	0.251716	0.599089	0.149688
NFYA	P23511	Nuclear transcription factor Y subunit alpha	17.3445	17.2747	17.1554	17.1916	17.2695	17.2618	17.3378	17.3086	17.1666	0.0469291	0.94019	0.0267844	0.00704384	0.736165	0.313181	0.504205	0.0967382	1.17433	0.189594	0.722174	-0.0896943
AHCY	P23526	Adenosylhomocysteinase	24.2446	24.47	24.4005	24.2598	24.4826	24.3477	24.3064	24.3508	24.4191	1.63355	0.0953649	1.02061	-0.164159	1.86189	0.0606374	1.21726	-0.11883	0.408366	0.582783	0.234493	-0.0453281
CFL1	P23528	Cofilin-1	24.0006	24.0428	23.9961	23.9744	23.994	24.0508	24.011	23.983	24.0205	0.203007	0.768479	0.114368	-0.0112464	0.636345	0.368724	0.433299	-0.027118	0.260651	0.719617	0.142899	0.0158717
EIF4B	P23588	Eukaryotic translation initiation factor 4B	21.5917	21.4551	21.4598	21.5539	21.4481	21.489	21.5476	21.5709	21.3988	0.800885	0.321303	0.493085	0.0730228	1.73743	0.0711392	1.14789	0.115191	0.368265	0.617971	0.209032	-0.0421677
F8A1	P23610	Factor VIII intron 22 protein	17.3664	17.324	17.2323	17.4446	17.2898	17.2512	17.2786	17.311	17.3218	0.488126	0.507449	0.294607	0.0548903	0.793566	0.285429	0.544502	0.0947405	0.616763	0.431754	0.364764	-0.0398502
ATP2B4	P23634	Plasma membrane calcium-transporting ATPase 4	20.1808	20.2863	20.2865	20.2003	20.2561	20.3024	20.1506	20.2807	20.3036	2.31894	0.0400891	1.39697	-0.0971152	2.8326	0.0196186	1.70733	-0.1203	1.00928	0.240723	0.618483	0.0231851
DGKA	P23743	Diacylglycerol kinase alpha	14.2502	14.3925	14.3179	13.89	14.1995	14.4061	14.1332	14.1577	14.4732	0.546793	0.465596	0.331991	-0.158745	1.25436	0.142323	0.846724	-0.307901	0.810383	0.321609	0.492671	0.149156
CPT2	P23786	Carnitine O-palmitoyltransferase 2, mitochondrial	20.4014	20.5992	20.6382	20.4709	20.5358	20.6269	20.4082	20.6287	20.6245	1.99092	0.0588375	1.23035	-0.16109	3.07773	0.0164221	1.78457	-0.203068	0.68943	0.387421	0.411817	0.0419782
DTYMK	P23919	Thymidylate kinase	21.2947	21.4542	21.4655	21.387	21.445	21.3789	21.362	21.3619	21.4934	0.834801	0.305854	0.514486	-0.0724716	1.04301	0.19579	0.708209	-0.0979818	0.219544	0.757505	0.120615	0.0255102
RRM1	P23921	Ribonucleoside-diphosphate reductase large subunit	22.5843	22.73	22.7502	22.6791	22.6629	22.7296	22.6296	22.6883	22.7741	0.866603	0.290715	0.536533	-0.0626831	1.78362	0.0671795	1.17276	-0.12028	1.15695	0.193628	0.713031	0.0575968
CHM	P24386	Rab proteins geranylgeranyltransferase component A 1	16.9696	16.9413	17.2128	17.0928	16.844	17.2063	16.9855	16.967	17.1655	0.850255	0.298464	0.525107	0.0985756	1.90434	0.0571075	1.24331	-0.178893	2.63374	0.031724	1.49861	0.277469
KDELR1	P24390	ER lumen protein-retaining receptor 1	13.606	14.1869	14.4511	14.0313	14.3004	13.7955	14.2245	13.3055	14.7102	0.021081	0.973988	0.0114464	0.0229934	0.484261	0.471019	0.326962	-0.365018	0.394003	0.594349	0.225958	0.388011
NR2F2	P24468	COUP transcription factor 2	17.5772	17.8827	17.8451	17.7213	17.8838	17.7036	17.6219	17.8968	17.7872	2.3521	0.0386962	1.41233	-0.247616	1.10088	0.178694	0.747891	-0.138513	1.24013	0.171859	0.764828	-0.109104
EEF1B2	P24534	Elongation factor 1-beta	23.8288	23.807	23.7152	23.7171	23.8729	23.7753	23.8053	23.8763	23.7558	0.770783	0.334058	0.476179	-0.0683104	0.384079	0.55563	0.255215	0.0350075	1.64322	0.0993379	1.00288	-0.103318
ATP5F1	P24539	ATP synthase F(0) complex subunit B1, mitochondrial	20.5782	20.6427	20.7424	20.5608	20.7376	20.6885	20.6072	20.4664	20.8193	0.1554	0.818281	0.0870974	-0.0334714	1.85305	0.0612751	1.21272	-0.167972	0.696201	0.384295	0.415335	0.134501
ACP1	P24666	Low molecular weight phosphotyrosine protein phosphatase	21.7575	21.7146	21.7685	21.6708	21.7585	21.769	21.7845	21.648	21.7716	0.258905	0.710712	0.148306	0.0305754	0.394457	0.545088	0.263534	-0.0320543	0.90907	0.27757	0.556628	0.0626297
ACAT1	P24752	Acetyl-CoA acetyltransferase, mitochondrial	23.0324	22.8817	23.0382	23.0197	22.8574	23.0247	23.0144	22.8522	23.0707	3.94016	0.00847828	2.07169	0.15839	0.695346	0.333563	0.476822	-0.0223637	3.41464	0.0159368	1.7976	0.180754
CCNC	P24863	Cyclin-C	15.8973	15.9491	15.9732	15.9161	15.8439	16.0339	15.7752	16.1071	15.9077	0.515794	0.487855	0.311709	-0.103838	0.885041	0.247457	0.606501	-0.108733	0.0192236	0.976753	0.0102153	0.00489489
POLR2A	P24928	DNA-directed RNA polymerase II subunit RPB1	22.1613	22.1449	22.1737	22.2096	22.1358	22.1421	22.1832	22.1165	22.1756	1.48717	0.117577	0.929676	0.0522881	0.518192	0.447088	0.349607	0.020874	1.07608	0.217407	0.662727	0.031414
CDK2	P24941	Cyclin-dependent kinase 2	20.5805	20.6651	20.6027	20.6975	20.6187	20.5076	20.5332	20.7407	20.512	0.516489	0.487773	0.311782	-0.0710869	0.471616	0.480663	0.31816	0.0629527	1.32986	0.151875	0.818514	-0.13404
APC	P25054	Adenomatous polyposis coli protein	15.2706	15.0283	15.0232	15.2488	14.983	15.0419	15.1801	14.9111	15.1765	2.39312	0.0369262	1.43267	0.259058	1.29042	0.134919	0.869925	0.152642	0.834787	0.309786	0.508938	0.106416
ADRBK1	P25098	Beta-adrenergic receptor kinase 1	18.621	18.5505	18.5372	18.6329	18.4566	18.6025	18.5502	18.5832	18.5452	0.70934	0.364553	0.43824	0.0712738	0.530117	0.439166	0.357371	0.0397339	0.296428	0.683377	0.165339	0.0315399
MCM3	P25205	DNA replication licensing factor MCM3	23.2743	23.2301	23.2109	23.2667	23.233	23.2221	23.249	23.2307	23.2458	1.88066	0.0678841	1.16823	0.0321077	1.36105	0.121236	0.916367	0.0370948	0.184161	0.793799	0.100289	-0.00498708
NFYB	P25208	Nuclear transcription factor Y subunit beta	17.4362	17.4619	17.1944	17.2385	17.5493	17.3732	17.4181	17.3324	17.3414	0.396178	0.581153	0.235709	-0.0835889	0.296953	0.637574	0.19547	0.0612958	0.800188	0.327621	0.484629	-0.144885
MPST	P25325	3-mercaptopyruvate sulfurtransferase	21.1339	21.089	21.2146	21.1059	21.0938	21.2314	21.1549	21.0873	21.1796	1.35597	0.140957	0.850913	0.0415777	1.67723	0.0773184	1.11172	-0.0769596	2.81415	0.0266759	1.57388	0.118537
RPS12	P25398	40S ribosomal protein S12	24.0108	24.0049	23.9429	24.0564	23.9888	23.9374	24.0551	23.8883	24.0442	0.950968	0.257005	0.590058	0.0801296	0.806646	0.279456	0.553687	0.0659568	0.101105	0.88314	0.0539703	0.0141729
BRD2	P25440	Bromodomain-containing protein 2	21.2144	21.2168	21.145	21.2187	21.212	21.1524	21.1874	21.22	21.1763	0.394972	0.582176	0.234946	-0.00941277	1.64039	0.0813052	1.08988	0.0489235	2.4087	0.0403956	1.39367	-0.0583363
YY1	P25490	Transcriptional repressor protein YY1	19.4106	19.5582	19.4751	19.4283	19.6151	19.4365	19.4893	19.4415	19.4831	0.781354	0.329701	0.48188	-0.0955518	0.327966	0.608614	0.215658	-0.0221952	0.6211	0.428541	0.368008	-0.0733566
DNAJB1	P25685	DnaJ homolog subfamily B member 1	22.0117	21.8532	21.9142	21.9705	21.8463	21.9694	22.0126	21.7906	21.9632	2.64846	0.0273603	1.56288	0.168232	1.03872	0.197013	0.705504	0.0493113	1.96718	0.0658966	1.18114	0.118921
ATP5A1	P25705	ATP synthase subunit alpha, mitochondrial	24.7913	24.727	24.8249	24.7658	24.7417	24.8345	24.7784	24.7434	24.812	1.98764	0.0591535	1.22802	0.0411345	2.00266	0.0505423	1.29634	-0.0452614	3.30807	0.017494	1.75711	0.0863959
PSMA1	P25786	Proteasome subunit alpha type-1	22.7306	22.7004	22.695	22.7232	22.6793	22.7478	22.7184	22.7213	22.7085	0.875225	0.287071	0.54201	0.0237179	0.161221	0.786423	0.104344	0.00697581	0.348038	0.635696	0.19675	0.0167421
PSMA2	P25787	Proteasome subunit alpha type-2	21.3421	21.5009	21.484	21.4315	21.4888	21.4201	21.4017	21.5287	21.4303	1.78119	0.0779003	1.10846	-0.114347	0.739094	0.311449	0.506613	-0.0530408	1.24673	0.170241	0.768935	-0.061306
PSMA3	P25788	Proteasome subunit alpha type-3	22.6156	22.7647	22.8357	22.7538	22.6547	22.7735	22.6319	22.7987	22.7969	0.514813	0.488108	0.311485	-0.072286	1.33657	0.125732	0.900555	-0.134977	0.594993	0.445554	0.351099	0.0626914
PSMA4	P25789	Proteasome subunit alpha type-4	22.3807	22.562	22.6214	22.5504	22.4831	22.5269	22.386	22.612	22.5443	0.777906	0.331097	0.480045	-0.113358	0.931341	0.230943	0.636495	-0.125156	0.0883763	0.898359	0.0465499	0.0117982
PTX3	P26022	Pentraxin-related protein PTX3	13.1559	13.3375	13.8853	13.0701	13.5292	13.7647	13.0207	13.6335	13.771	1.92784	0.0637463	1.19555	-0.417875	3.69799	0.00920029	2.0362	-0.724789	1.49363	0.120881	0.917644	0.306913
MSN	P26038	Moesin	23.594	23.6074	23.6584	23.6272	23.5846	23.6482	23.5762	23.6375	23.6303	0.192018	0.779966	0.107924	-0.010725	1.27965	0.137282	0.862387	-0.0465342	0.964222	0.256739	0.590508	0.0358092
PTPN3	P26045	Tyrosine-protein phosphatase non-receptor type 3	12.4579	12.4639	12.4527	12.2499	12.3087	12.8321	12.1438	12.7865	12.4225	0.631315	0.409909	0.387313	-0.235833	0.821285	0.273653	0.5628	-0.285263	0.0913472	0.894867	0.0482413	0.0494305
DDX6	P26196	Probable ATP-dependent RNA helicase DDX6	21.5165	21.6208	21.5696	21.6048	21.5145	21.5814	21.5288	21.5587	21.6091	0.129781	0.847979	0.0716149	-0.0146249	0.538572	0.433238	0.363273	-0.0366065	0.26642	0.713939	0.146339	0.0219816
DNMT1	P26358	DNA (cytosine-5)-methyltransferase 1	22.9373	22.9089	22.914	22.969	22.926	22.8859	22.9873	22.8543	22.9285	1.22645	0.16889	0.772396	0.0681572	1.34205	0.124843	0.903637	0.0551243	0.201024	0.775204	0.110584	0.0130329
PAX6	P26367	Paired box protein Pax-6	14.8945	14.8749	14.554	14.7292	14.898	14.6371	14.7956	14.4013	14.9126	0.184578	0.78753	0.103733	0.0816943	0.371665	0.567302	0.246186	0.105188	0.0410492	0.950782	0.0219189	-0.0234934
U2AF2	P26368	Splicing factor U2AF 65 kDa subunit	21.4944	21.7885	21.7432	21.4712	21.787	21.7129	21.6217	21.5177	21.8884	0.76483	0.336702	0.472754	-0.168627	1.61408	0.0838556	1.07647	-0.252387	0.327927	0.652691	0.185293	0.0837593
RPL13	P26373	60S ribosomal protein L13	23.5678	23.4367	23.4428	23.5269	23.4214	23.486	23.5131	23.5602	23.3916	0.603034	0.42768	0.368881	0.0631517	1.4021	0.113718	0.944169	0.095787	0.250028	0.731236	0.135942	-0.0326354
CHML	P26374	Rab proteins geranylgeranyltransferase component A 2	18.2261	18.1316	18.4101	18.295	18.1452	18.3515	18.188	18.1796	18.4238	1.1507	0.189475	0.722448	0.0842412	1.84165	0.0623313	1.20529	-0.158782	3.11272	0.0193175	1.71405	0.243024
IVD	P26440	Isovaleryl-CoA dehydrogenase, mitochondrial	20.9867	20.8878	20.846	21.0115	20.8632	20.8093	20.8814	21.0217	20.8265	0.218866	0.750892	0.124422	0.0356223	1.48752	0.0997239	1.0012	0.132585	0.897438	0.282277	0.549325	-0.0969626
HMGB2	P26583	High mobility group protein B2	21.7669	21.9448	21.5864	21.6141	21.9844	21.6209	21.733	21.6037	21.747	0.467014	0.522836	0.281634	-0.139681	0.324666	0.611849	0.213356	0.0531985	0.671645	0.397137	0.40106	-0.192879
PTBP1	P26599	Polypyrimidine tract-binding protein 1	23.1304	23.3066	23.1688	23.1509	23.2993	23.1736	23.1489	23.303	23.1778	4.68689	0.00696438	2.15712	-0.159552	1.8835	0.0588619	1.23017	-0.0300051	5.56419	0.00611547	2.21357	-0.129546
TARS	P26639	Threonine--tRNA ligase, cytoplasmic	24.0377	24.1196	24.2565	24.0935	24.0558	24.2439	24.0394	24.1547	24.2203	0.7093	0.364553	0.43824	-0.0532029	3.00972	0.0171229	1.76642	-0.18339	1.87156	0.0733647	1.13451	0.130187
VARS	P26640	Valine--tRNA ligase	23.0734	23.0763	23.1664	23.1462	23.0177	23.154	23.0785	23.0802	23.1549	0.595866	0.431724	0.364794	0.0412807	1.16605	0.161959	0.790596	-0.0590223	2.08314	0.0571854	1.24271	0.100303
EEF1G	P26641	Elongation factor 1-gamma	24.867	24.9376	24.7922	24.8375	24.9351	24.8042	24.8617	24.8021	24.9199	0.326129	0.643836	0.191225	-0.0362161	0.148602	0.802496	0.095557	0.0166454	0.365074	0.620765	0.207073	-0.0528615
FKBP2	P26885	Peptidyl-prolyl cis-trans isomerase FKBP2	19.667	19.6396	19.7821	19.5652	19.6329	19.8701	19.6878	19.6062	19.7981	0.128503	0.849209	0.0709855	0.0137367	1.71811	0.0731369	1.13586	-0.176764	2.56072	0.033951	1.46915	0.1905
ACVR2A	P27037	Activin receptor type-2A	12.1837	12.3521	12.4447	12.3544	12.0383	12.6826	12.3922	12.1987	12.6109	0.439541	0.543726	0.26462	0.113734	1.3231	0.128608	0.890732	-0.269295	1.5392	0.11392	0.943401	0.383029
STOM	P27105	Erythrocyte band 7 integral membrane protein	18.1495	18.1046	18.1265	18.213	18.1399	18.0575	18.0837	18.1944	18.1631	0.017462	0.977775	0.00976102	0.00239499	0.273363	0.660289	0.180266	0.0330569	0.308644	0.670566	0.173558	-0.0306619
AK4	P27144	Adenylate kinase 4, mitochondrial	20.7155	20.7535	20.3529	20.6984	20.7431	20.3565	20.6202	20.767	20.4007	1.19315	0.178422	0.748551	-0.0765184	3.1285	0.0159588	1.797	0.308013	4.66038	0.00740275	2.13061	-0.384532
YWHAQ	P27348	14-3-3 protein theta	22.5443	22.6336	22.6629	22.6266	22.588	22.6538	22.591	22.5804	22.6965	0.173737	0.79918	0.0973553	-0.0133254	1.43451	0.108202	0.965763	-0.0837256	1.53867	0.113922	0.943392	0.0704002
MAPK3	P27361	Mitogen-activated protein kinase 3	20.9494	20.8787	20.8452	20.9137	20.9224	20.8511	20.9556	20.8161	20.8902	0.938042	0.26265	0.580622	0.0671857	1.80161	0.0657485	1.18211	0.0773913	0.108752	0.874643	0.0581694	-0.0102056
MARK3	P27448	MAP/microtubule affinity-regulating kinase 3	17.9014	17.944	18.0323	18.0372	17.8897	17.8805	17.8691	18.0589	17.9142	0.14684	0.827354	0.0823088	-0.0283184	0.031516	0.954702	0.0201322	-0.00646019	0.117137	0.864469	0.0632504	-0.0218582
ATP6V0C	P27449	V-type proton ATPase 16 kDa proteolipid subunit	16.3589	16.4848	16.8097	16.6479	16.4033	16.5222	16.3633	16.7557	16.5494	0.253005	0.716246	0.144938	-0.0912425	0.57244	0.410679	0.386498	-0.170397	0.219503	0.757505	0.120615	0.079155
ARNT	P27540	Aryl hydrocarbon receptor nuclear translocator	18.4684	18.1905	18.3625	18.4067	18.1768	18.4684	18.374	18.2758	18.3946	2.08326	0.0527511	1.27777	0.202006	0.0653603	0.910056	0.0409317	0.00785001	1.93468	0.0688288	1.16223	0.194156
CERS1	P27544	Ceramide synthase 1	16.4527	16.3312	16.4826	16.2895	16.4937	16.5491	16.456	16.2887	16.5789	0.123848	0.854356	0.0683614	0.0281703	1.04375	0.195514	0.708822	-0.137451	1.13502	0.200444	0.698006	0.165621
RPL10	P27635	60S ribosomal protein L10	23.8664	23.8294	23.8958	23.8449	23.8677	23.8615	23.925	23.7944	23.8738	0.687226	0.376513	0.42422	0.0482394	0.0219158	0.969603	0.013406	0.00170453	0.928706	0.270835	0.567295	0.0465349
RPA1	P27694	Replication protein A 70 kDa DNA-binding subunit;Replication protein A 70 kDa DNA-binding subunit, N-terminally processed	22.6946	22.5821	22.8954	22.7841	22.5238	22.8427	22.7279	22.5487	22.8827	2.38894	0.0371404	1.43015	0.184071	1.97118	0.0527135	1.27808	-0.138014	3.80912	0.0122591	1.91154	0.322085
APEX1	P27695	DNA-(apurinic or apyrimidinic site) lyase;DNA-(apurinic or apyrimidinic site) lyase, mitochondrial	22.0578	22.2134	22.2148	22.0461	22.2323	22.1869	22.1595	21.9606	22.3593	0.193055	0.779374	0.108254	-0.0476704	1.20948	0.152341	0.817184	-0.165852	0.50371	0.508292	0.293886	0.118182
DCK	P27707	Deoxycytidine kinase	18.7171	18.7196	18.778	18.7069	18.7152	18.7773	18.7818	18.6728	18.7837	0.517492	0.487194	0.312298	0.0327708	0.878086	0.249983	0.602089	-0.04437	2.16134	0.0520329	1.28372	0.0771408
CAD	P27708	CAD protein;Glutamine-dependent carbamoyl-phosphate synthase;Aspartate carbamoyltransferase;Dihydroorotase	23.5633	23.4844	23.4803	23.6009	23.4408	23.4659	23.5515	23.5189	23.4657	1.54149	0.10902	0.962496	0.0905043	2.53164	0.0255238	1.59305	0.101282	0.177003	0.802402	0.0956081	-0.0107778
CALR	P27797	Calreticulin	22.6561	22.8608	23.1093	22.6809	22.9121	23.0153	22.7186	22.8702	23.0399	2.90638	0.0209285	1.67926	-0.195776	3.41646	0.011994	1.92103	-0.369596	2.24199	0.047517	1.32315	0.17382
MAP4	P27816	Microtubule-associated protein 4	23.0353	23.0137	22.9586	22.9562	23.053	23.0144	23.0435	22.9992	22.9743	0.116088	0.862455	0.0642637	-0.0102577	0.379032	0.559965	0.251839	0.0292327	0.788816	0.333493	0.476914	-0.0394904
CANX	P27824	Calnexin	23.557	23.6581	23.6751	23.5432	23.6512	23.6959	23.6625	23.3921	23.8421	0.0751964	0.910689	0.0406297	0.0203927	1.09232	0.18139	0.741387	-0.150166	0.76931	0.343915	0.463549	0.170559
PIK3R1	P27986	Phosphatidylinositol 3-kinase regulatory subunit alpha	16.4857	16.5428	16.3691	16.4647	16.5391	16.4288	16.423	16.5734	16.4112	1.9298	0.0636212	1.1964	-0.0939897	1.00511	0.207525	0.682929	0.0547632	2.69698	0.0303962	1.51718	-0.148753
PSMA5	P28066	Proteasome subunit alpha type-5	22.6917	22.9628	22.864	22.7715	22.9433	22.8134	22.7187	22.8845	22.9088	2.44033	0.0346809	1.45991	-0.202926	1.69213	0.0757114	1.12084	-0.134823	0.875562	0.290387	0.537022	-0.0681032
PSMB4	P28070	Proteasome subunit beta type-4	21.9832	22.1283	22.1353	22.0756	22.0529	22.0984	21.9865	22.1597	22.0987	1.05603	0.218113	0.661318	-0.0984777	1.3679	0.11988	0.921255	-0.0956472	0.0279759	0.967123	0.0145185	-0.00283051
PSMB6	P28072	Proteasome subunit beta type-6	21.9571	21.951	22.0126	22.0347	21.9288	21.9631	21.9397	22.039	21.9229	0.0317788	0.960363	0.0175648	0.00419871	0.100382	0.864496	0.063237	0.0109189	0.0545458	0.935368	0.0290176	-0.00672023
PSMB5	P28074	Proteasome subunit beta type-5	21.8628	22.1518	22.1508	22.0362	22.0504	22.084	21.9086	22.1706	22.0856	1.37609	0.137299	0.862333	-0.188412	1.41265	0.111981	0.950856	-0.170959	0.150231	0.828297	0.0818141	-0.0174529
GSTM2	P28161	Glutathione S-transferase Mu 2	21.4466	21.3347	21.6221	21.5697	21.2576	21.5651	21.4657	21.3085	21.596	1.91848	0.064515	1.19034	0.193743	1.1332	0.170033	0.769467	-0.100375	3.33385	0.0172135	1.76413	0.294118
ABCD3	P28288	ATP-binding cassette sub-family D member 3	21.2066	21.1967	21.3316	21.2627	21.1556	21.3266	21.1798	21.223	21.3449	0.322478	0.647532	0.188739	0.024608	2.03593	0.048652	1.3129	-0.11798	2.66039	0.0308089	1.51132	0.142588
TMOD1	P28289	Tropomodulin-1	18.4639	18.7106	18.2749	18.2969	18.8113	18.3479	18.3828	18.6947	18.363	2.38773	0.0371961	1.4295	-0.357652	0.402758	0.537116	0.269932	0.0526295	3.07585	0.0201087	1.69662	-0.410281
SSFA2	P28290	Sperm-specific antigen 2	16.3116	16.155	16.2877	16.3925	16.1356	16.2506	16.2631	16.2784	16.2119	1.06614	0.21573	0.66609	0.132748	0.762687	0.300612	0.521994	0.0723489	0.535174	0.486636	0.312796	0.0603987
NDUFS1	P28331	NADH-ubiquinone oxidoreductase 75 kDa subunit, mitochondrial	22.234	22.2528	21.9254	22.2831	22.1561	21.9458	22.2209	22.1733	22.012	0.666981	0.389006	0.410044	0.0519288	3.04093	0.0167676	1.77553	0.284897	2.37755	0.0418051	1.37877	-0.232968
POLD1	P28340	DNA polymerase delta catalytic subunit	21.2696	21.3975	21.0414	21.3007	21.3789	21.0217	21.2279	21.4227	21.0631	2.25311	0.0433029	1.36348	-0.133667	3.11729	0.016109	1.79293	0.223977	4.47767	0.0087691	2.05704	-0.357644
TEAD1	P28347	Transcriptional enhancer factor TEF-1	14.1309	14.4263	14.6602	14.38	14.3499	14.5426	14.1574	14.626	14.4467	1.00608	0.235181	0.628597	-0.244619	1.50839	0.0964996	1.01547	-0.327063	0.32986	0.651148	0.18632	0.0824445
SMARCA1	P28370	Probable global transcription activator SNF2L1	20.1518	20.2074	20.311	20.1601	20.2487	20.2694	20.1449	20.2489	20.2907	2.3319	0.0396301	1.40198	-0.0827262	3.3828	0.0122916	1.91039	-0.138112	1.41106	0.134706	0.870612	0.0553856
MAPK1	P28482	Mitogen-activated protein kinase 1	21.9627	21.9965	21.9546	22.0749	21.9479	21.8874	21.9996	21.9794	21.9214	0.452755	0.534076	0.272397	0.0377865	1.12005	0.1733	0.761202	0.091245	1.0435	0.228324	0.641448	-0.0534585
GCA	P28676	Grancalcin	18.1976	18.1726	18.2792	18.2782	18.1739	18.242	18.2226	18.1786	18.3072	1.13814	0.193017	0.714404	0.0577596	0.643371	0.364442	0.438371	-0.043293	2.22266	0.0481814	1.31712	0.101053
RXRB	P28702	Retinoic acid receptor RXR-beta	18.0374	17.9859	18.0037	18.0283	17.9681	18.0495	17.9745	18.0066	18.052	0.515161	0.488082	0.311507	0.0264994	0.359969	0.577838	0.238194	-0.0217133	1.17847	0.188309	0.725129	0.0482127
ERCC5	P28715	DNA repair protein complementing XP-G cells	16.0548	15.8929	15.7421	15.7561	15.8457	15.9809	15.9598	15.8221	15.939	0.316311	0.653045	0.185057	0.0699746	0.114453	0.844177	0.0735666	0.0361945	0.166474	0.812658	0.0900923	0.0337801
RBL1	P28749	Retinoblastoma-like protein 1	15.5977	15.9386	15.8362	15.8199	15.8343	15.7934	15.7894	15.931	15.7493	1.0061	0.235181	0.628597	-0.165622	0.317494	0.617725	0.209205	-0.0573349	1.21376	0.178468	0.748441	-0.108287
GRN	P28799	Granulins;Acrogranin;Paragranulin;Granulin-1;Granulin-2;Granulin-3;Granulin-4;Granulin-5;Granulin-6;Granulin-7	17.6954	17.5697	18.1367	17.704	17.5703	18.1084	17.8075	17.5581	17.9787	2.02447	0.0563322	1.24924	0.169601	2.30145	0.0339955	1.46858	-0.338907	3.31946	0.0172135	1.76413	0.508507
LAP3	P28838	Cytosol aminopeptidase	23.0156	23.0113	23.0253	23.0002	22.9774	23.0913	23.046	22.9039	23.0971	0.752773	0.342695	0.465092	0.056427	0.883609	0.247915	0.605697	-0.0506236	1.28088	0.162093	0.790235	0.107051
GTF2E1	P29083	General transcription factor IIE subunit 1	18.8577	19.0297	18.92	18.8803	19.006	18.9141	18.8593	19.0024	18.9443	3.70326	0.00962119	2.01677	-0.146954	2.16503	0.0412876	1.38418	-0.0603644	2.62962	0.031724	1.49861	-0.0865892
GTF2E2	P29084	Transcription initiation factor IIE subunit beta	19.2503	19.3258	19.3392	19.1799	19.4014	19.3351	19.3364	19.2185	19.3681	0.355955	0.615495	0.210776	-0.0596587	0.924653	0.233298	0.632089	-0.0918999	0.234195	0.745681	0.127447	0.0322412
TPP2	P29144	Tripeptidyl-peptidase 2	21.6995	21.7584	21.7842	21.7939	21.7052	21.7502	21.747	21.7063	21.7969	0.293153	0.676662	0.169628	0.0234756	0.42269	0.518967	0.28486	-0.0303408	1.12894	0.202355	0.693887	0.0538165
IMPA1	P29218	Inositol monophosphatase 1	20.5299	20.8292	20.7945	20.5339	20.8094	20.8	20.5464	20.7549	20.7922	3.48325	0.011458	1.94089	-0.26107	5.925	0.00422629	2.37404	-0.2588	0.0343863	0.959213	0.0180852	-0.00226974
EPHA2	P29317	Ephrin type-A receptor 2	15.3933	14.7898	15.2121	15.1481	14.8247	15.382	14.9351	15.1841	15.2436	0.546591	0.465706	0.331888	0.225943	0.351471	0.58541	0.23254	-0.120396	1.19353	0.184703	0.733527	0.34634
EPHA3	P29320	Ephrin type-A receptor 3	13.0942	13.6103	13.3574	13.4993	13.0742	13.4945	13.1726	13.3587	13.5405	0.176677	0.795254	0.099494	-0.0923611	0.701834	0.329921	0.48159	-0.208778	0.285872	0.693858	0.15873	0.116417
EPHB2	P29323	Ephrin type-B receptor 2	14.1541	13.926	14.0533	14.0765	13.7605	14.2474	13.6775	14.06	14.3173	0.114173	0.864904	0.0630323	0.0538486	0.637468	0.368029	0.434117	-0.236664	1.16535	0.191493	0.717848	0.290513
SHC1	P29353	SHC-transforming protein 1	18.6583	18.8396	18.7673	18.6299	18.838	18.8089	18.6915	18.8201	18.7452	3.10205	0.0174674	1.75777	-0.17266	1.93629	0.0551255	1.25865	-0.113863	1.39227	0.138136	0.859692	-0.0587972
MPG	P29372	DNA-3-methyladenine glycosylase	19.8682	19.6613	19.7843	19.856	19.6854	19.7758	19.819	19.7356	19.7525	2.36038	0.0382705	1.41714	0.153625	1.9227	0.0559146	1.25247	0.0768452	1.48942	0.121484	0.915482	0.0767803
CRABP2	P29373	Cellular retinoic acid-binding protein 2	18.2319	18.6414	18.7881	18.2613	18.5307	18.8051	18.1785	18.5269	18.8666	2.8079	0.0234004	1.63078	-0.342438	4.20857	0.00611068	2.21391	-0.59606	2.33105	0.0436647	1.35987	0.253622
KDM5A	P29375	Lysine-specific demethylase 5A	16.0072	16.127	16.0507	16.0555	16.0979	16.0634	16.0884	15.9902	16.0188	0.168203	0.805512	0.0939279	-0.0213191	0.0790877	0.893051	0.0491236	0.00606664	0.248191	0.733249	0.134749	-0.0273857
COL4A5	P29400	Collagen alpha-5(IV) chain	14.0031	13.5686	14.4209	14.2907	13.8635	13.9626	13.9883	14.062	14.0657	0.687494	0.376513	0.42422	0.262708	0.119217	0.838074	0.0767174	-0.0556723	0.730908	0.364868	0.437865	0.31838
TKT	P29401	Transketolase	24.1373	24.2425	24.174	24.1905	24.2058	24.1534	24.13	24.2888	24.1388	1.41477	0.130441	0.884586	-0.0931371	0.044868	0.935247	0.0290737	-0.00284068	1.58856	0.106802	0.971419	-0.0902964
LMOD1	P29536	Leiomodin-1	14.6712	14.6269	14.8119	14.5176	14.8519	14.7783	14.7052	14.5987	14.8609	0.244762	0.723303	0.14068	-0.0611579	1.38617	0.116732	0.93281	-0.185702	0.676447	0.394781	0.403644	0.124544
RBMS1	P29558	RNA-binding motif, single-stranded-interacting protein 1	17.7211	17.8476	17.9414	17.7916	17.8993	17.8073	17.8223	17.6403	18.0233	0.0721927	0.91407	0.0390205	-0.0174306	0.979232	0.215369	0.666818	-0.145671	0.563025	0.466365	0.331274	0.12824
PML	P29590	Protein PML	19.316	19.2864	19.2887	19.3513	19.2768	19.2889	19.3308	19.2609	19.2974	1.99562	0.0584327	1.23334	0.0580228	1.74352	0.0707501	1.15027	0.0410264	0.999852	0.244063	0.612499	0.0169964
TYK2	P29597	Non-receptor tyrosine-protein kinase TYK2	13.8875	14.0436	13.8524	13.6755	13.9974	14.0627	13.3455	14.2783	14.0197	1.22683	0.16889	0.772396	-0.470297	0.9399	0.228271	0.641549	-0.342117	0.52125	0.496492	0.304087	-0.128181
EEF1D	P29692	Elongation factor 1-delta	23.339	23.2998	23.2559	23.2903	23.3357	23.2579	23.3048	23.3067	23.279	0.0513219	0.937027	0.0282477	-0.0027078	1.35807	0.121762	0.914487	0.0470912	1.70502	0.0922836	1.03488	-0.049799
MARCKS	P29966	Myristoylated alanine-rich C-kinase substrate	20.7382	20.8029	20.6146	20.6986	20.8793	20.5409	20.7414	20.5998	20.7748	0.152955	0.820998	0.0856579	-0.0346107	0.514802	0.448823	0.347925	0.0826193	0.468789	0.535117	0.271551	-0.11723
GNA11	P29992	Guanine nucleotide-binding protein subunit alpha-11	16.7663	16.9028	16.8158	16.9604	16.7635	16.6971	16.858	16.7209	16.9138	0.348042	0.623153	0.205405	0.065836	0.247768	0.687772	0.162556	0.0526358	0.0546303	0.935325	0.0290373	0.0132001
ALDH4A1	P30038	Delta-1-pyrroline-5-carboxylate dehydrogenase, mitochondrial	18.3845	18.197	18.2904	18.3352	18.1493	18.3757	18.3967	18.0655	18.399	2.27028	0.0424379	1.37225	0.234866	0.170786	0.774629	0.110906	0.0171649	1.89676	0.0712596	1.14716	0.217701
PBLD	P30039	Phenazine biosynthesis-like domain-containing protein	14.6741	14.5791	14.1431	14.4008	14.4642	14.6366	14.6757	14.1717	14.5668	0.515839	0.487855	0.311709	0.178532	0.306246	0.628429	0.201743	0.134732	0.0786925	0.909536	0.0411801	0.0438
ERP29	P30040	Endoplasmic reticulum resident protein 29	22.0648	21.9352	21.9528	21.9242	21.9835	22.0586	21.9744	22.0239	21.9737	0.0492425	0.938648	0.0274973	0.00695483	0.0473938	0.932174	0.0305031	-0.0072403	0.125964	0.855946	0.0675535	0.0141951
PRDX6	P30041	Peroxiredoxin-6	23.9179	24.0695	24.0411	23.973	24.0252	24.0266	23.919	24.0879	24.0176	2.0546	0.0543954	1.26444	-0.124183	2.03943	0.048541	1.31389	-0.0917816	0.749793	0.354372	0.45054	-0.0324014
C21orf33	P30042	ES1 protein homolog, mitochondrial	20.7823	20.9136	21.1911	20.7861	20.9544	21.1261	20.8882	20.8272	21.1498	0.711368	0.363686	0.439274	-0.0795193	2.98225	0.0174639	1.75786	-0.336799	2.44298	0.0391755	1.40699	0.25728
BLVRB	P30043	Flavin reductase (NADPH)	19.4631	19.2662	19.5389	19.5623	19.2357	19.4551	19.4311	19.2824	19.5519	2.23298	0.0439202	1.35734	0.224042	0.23531	0.701062	0.154244	-0.0298119	2.79928	0.0272058	1.56534	0.253853
PRDX5	P30044	Peroxiredoxin-5, mitochondrial	22.5603	22.6772	22.7755	22.4936	22.7339	22.7502	22.5702	22.6595	22.7407	1.97333	0.060211	1.22032	-0.148848	2.91362	0.0180379	1.74381	-0.214137	1.23879	0.172145	0.764105	0.0652892
DDT	P30046	D-dopachrome decarboxylase;D-dopachrome decarboxylase-like protein	21.4401	21.4665	21.7148	21.439	21.4353	21.7174	21.4181	21.535	21.6428	0.700483	0.369706	0.432144	-0.0465342	3.27972	0.013797	1.86021	-0.259281	2.29061	0.045134	1.3455	0.212746
GCHFR	P30047	GTP cyclohydrolase 1 feedback regulatory protein	15.3961	15.2462	15.3386	15.5119	15.1209	15.389	15.3202	15.2503	15.4596	1.35738	0.140878	0.851156	0.203562	0.0725934	0.901596	0.0449878	0.0136395	1.58294	0.107304	0.969382	0.189923
PRDX3	P30048	Thioredoxin-dependent peroxide reductase, mitochondrial	22.6072	22.676	22.8282	22.7371	22.6459	22.7204	22.5768	22.7967	22.7388	0.415946	0.562347	0.249996	-0.0658353	0.963414	0.220937	0.655732	-0.122103	0.422151	0.571625	0.242888	0.0562674
ATP5D	P30049	ATP synthase subunit delta, mitochondrial	19.6104	19.5114	19.454	19.5132	19.5895	19.517	19.616	19.448	19.6498	0.530308	0.478532	0.320089	0.0635656	0.233287	0.703262	0.152883	0.0396016	0.123901	0.857588	0.0667213	0.0239639
RPL12	P30050	60S ribosomal protein L12	23.0218	22.9691	23.045	23.032	22.9608	23.0531	23.0483	22.9343	22.9676	2.4367	0.0347846	1.45861	0.0793095	0.161016	0.786668	0.104209	0.0121358	1.08223	0.215812	0.665924	0.0671736
ECHS1	P30084	Enoyl-CoA hydratase, mitochondrial	22.0968	22.2417	22.222	22.189	22.2258	22.1481	22.1181	22.1908	22.2369	1.25688	0.162087	0.790251	-0.0847867	0.799253	0.282986	0.548235	-0.0676842	0.211819	0.765015	0.11633	-0.0171026
CMPK1	P30085	UMP-CMP kinase	20.9815	20.5499	20.7666	21.007	20.4336	20.7541	20.9675	20.5196	20.7355	3.72065	0.00962119	2.01677	0.484293	4.04095	0.00703481	2.15275	0.233243	2.65408	0.0309881	1.50881	0.25105
PEBP1	P30086	Phosphatidylethanolamine-binding protein 1;Hippocampal cholinergic neurostimulating peptide	22.9256	22.9668	23.0698	22.9901	22.944	23.0197	22.9613	22.9447	23.0522	0.13027	0.847503	0.0718589	0.00711886	1.68871	0.0760123	1.11912	-0.0882359	2.35307	0.0427426	1.36914	0.0953547
PDIA3	P30101	Protein disulfide-isomerase A3	24.5042	24.3844	24.4189	24.4763	24.3965	24.4368	24.4499	24.3507	24.46	2.05769	0.0542461	1.26563	0.0995992	0.90527	0.240497	0.61889	0.038201	1.55784	0.111472	0.952836	0.0613982
PPP2R1A	P30153	Serine/threonine-protein phosphatase 2A 65 kDa regulatory subunit A alpha isoform	23.0782	23.2264	23.2229	23.1273	23.1935	23.2095	23.0958	23.2104	23.2337	2.50507	0.0324174	1.48922	-0.109678	2.79593	0.0202458	1.69367	-0.121623	0.433182	0.563616	0.249017	0.0119451
PPP2R1B	P30154	Serine/threonine-protein phosphatase 2A 65 kDa regulatory subunit A beta isoform	20.2976	20.3359	20.2358	20.3619	20.275	20.2322	20.2517	20.3728	20.2374	0.219798	0.749938	0.124974	-0.0241528	1.00637	0.207076	0.683869	0.0686302	1.50398	0.118917	0.924755	-0.092783
CDC27	P30260	Cell division cycle protein 27 homolog	20.0885	20.2532	20.2652	20.1	20.2203	20.2379	20.1078	20.3514	20.1936	1.94219	0.0624033	1.20479	-0.176177	2.45798	0.027994	1.55294	-0.133443	0.406927	0.583691	0.233817	-0.0427335
WEE1	P30291	Wee1-like protein kinase	13.1949	13.3128	13.3781	13.268	13.0526	13.3017	13.0379	13.2683	13.2954	0.157737	0.816308	0.0881458	-0.0442721	1.01802	0.203486	0.691465	-0.158118	0.602594	0.441329	0.355237	0.113846
CDC25C	P30307	M-phase inducer phosphatase 3	17.2117	17.337	17.4	17.2355	17.3326	17.4053	17.2971	17.3755	17.3026	1.59243	0.101671	0.992804	-0.100267	1.34926	0.123534	0.908214	-0.121181	0.226876	0.751754	0.123924	0.0209147
PPIF	P30405	Peptidyl-prolyl cis-trans isomerase F, mitochondrial	20.6555	20.6947	20.512	20.6247	20.6478	20.5553	20.6793	20.6014	20.539	0.0572761	0.930894	0.0310998	0.00517209	2.36418	0.0315634	1.50082	0.117754	1.71375	0.0911956	1.04003	-0.112582
NKTR	P30414	NK-tumor recognition protein;Putative peptidyl-prolyl cis-trans isomerase	16.4329	16.3295	16.3899	16.3669	16.459	16.2792	16.3988	16.317	16.3436	0.249279	0.719246	0.143122	0.0309868	0.763552	0.300308	0.522434	0.0619691	0.21673	0.760514	0.118893	-0.0309823
NMT1	P30419	Glycylpeptide N-tetradecanoyltransferase 1	22.0314	22.1081	22.0399	22.008	22.1007	22.0825	22.0123	22.1241	22.0546	3.14529	0.0169095	1.77187	-0.093736	1.35122	0.123243	0.909238	-0.0417404	1.65787	0.097662	1.01027	-0.0519956
HMOX2	P30519	Heme oxygenase 2	21.008	20.8927	20.9312	21.0192	20.8543	20.9615	21.0412	20.7583	21.0135	1.98601	0.0592329	1.22744	0.187688	0.978106	0.215854	0.66584	0.054074	1.34039	0.149322	0.825876	0.133614
ADSS	P30520	Adenylosuccinate synthetase isozyme 2	23.0226	23.1006	22.8768	23.0409	23.0699	22.8927	23.0419	23.0101	22.9325	0.386501	0.589807	0.22929	-0.0250518	2.79255	0.0202497	1.69358	0.134493	2.15465	0.0523245	1.2813	-0.159545
LRPAP1	P30533	Alpha-2-macroglobulin receptor-associated protein	20.1937	19.8759	19.9458	20.2582	19.8462	19.9041	20.2475	19.8084	19.9845	3.81472	0.00922082	2.03523	0.389607	3.14938	0.0158916	1.79883	0.288313	1.53911	0.11392	0.943401	0.101294
TSPO	P30536	Translocator protein	16.441	16.7512	17.3274	16.595	16.9904	16.8611	16.5204	17.2201	16.8707	1.51903	0.112524	0.948753	-0.468465	1.45269	0.10493	0.979099	-0.500962	0.0546847	0.935325	0.0290373	0.0324974
ADSL	P30566	Adenylosuccinate lyase	21.8733	22.1128	22.0562	21.9391	22.0844	22.0375	21.9169	22.1361	22.0307	2.92732	0.0205177	1.68787	-0.201364	2.4989	0.0264952	1.57683	-0.131711	1.84525	0.076307	1.11744	-0.0696526
CLIP1	P30622	CAP-Gly domain-containing linker protein 1	19.3845	19.3024	19.145	19.3203	19.3335	19.1564	19.3932	19.2411	19.1913	0.96972	0.24912	0.603592	0.0736631	2.77236	0.0205691	1.68678	0.201738	1.86215	0.0744567	1.1281	-0.128075
SRI	P30626	Sorcin	21.6936	21.7912	21.9976	21.7417	21.8265	21.8934	21.6832	21.8588	21.9283	1.96195	0.0611201	1.21382	-0.119332	2.55783	0.0248878	1.60401	-0.233631	1.46089	0.125558	0.901157	0.114299
SERPINB1	P30740	Leukocyte elastase inhibitor	18.7629	18.839	18.7435	18.7576	18.8469	18.7222	18.8525	18.7358	18.7684	0.125894	0.852094	0.0695125	-0.016229	0.620591	0.377768	0.422775	0.0463365	0.752681	0.352674	0.452627	-0.0625655
SLC7A1	P30825	High affinity cationic amino acid transporter 1	17.5899	17.9513	18.0541	17.7612	17.9361	17.8991	17.5865	18.1098	17.9674	1.93606	0.0629501	1.201	-0.35318	1.96085	0.0534078	1.2724	-0.327672	0.131446	0.849858	0.0706534	-0.0255082
ALDH1B1	P30837	Aldehyde dehydrogenase X, mitochondrial	21.7951	21.7685	21.6911	21.7393	21.7967	21.7133	21.7727	21.6837	21.7859	0.198304	0.773644	0.111459	0.0194003	0.519664	0.446222	0.350449	0.0389175	0.165578	0.813255	0.0897733	-0.0195173
POLR2B	P30876	DNA-directed RNA polymerase II subunit RPB2	21.8501	21.9317	21.8983	21.8755	21.927	21.9088	21.9013	21.88	21.9171	0.775181	0.33235	0.478404	-0.0372696	0.963974	0.220775	0.65605	-0.0324523	0.0995308	0.885311	0.052904	-0.00481733
SDHA	P31040	Succinate dehydrogenase [ubiquinone] flavoprotein subunit, mitochondrial	21.5664	21.563	21.4976	21.6081	21.6227	21.39	21.6245	21.3629	21.585	0.446098	0.538449	0.268855	0.0834611	0.856976	0.259029	0.586652	0.108774	0.0934262	0.892951	0.0491724	-0.0253131
CORO1A	P31146	Coronin-1A	17.5466	17.0679	17.3296	17.5416	16.9093	17.4359	17.5399	16.9378	17.4333	3.51426	0.0111038	1.95453	0.571039	1.82096	0.0642507	1.19212	0.143091	2.68795	0.0304575	1.51631	0.427949
GDI1	P31150	Rab GDP dissociation inhibitor alpha	21.9406	22.0909	22.1938	21.898	22.0684	22.2107	21.9399	22.1154	22.1765	2.96877	0.019735	1.70476	-0.165411	4.00072	0.00724513	2.13995	-0.267502	2.43277	0.0396244	1.40204	0.102091
MAT2A	P31153	S-adenosylmethionine synthase isoform type-2	22.9775	22.9422	22.8208	22.9834	22.9248	22.8264	22.9791	22.8651	22.8831	1.38079	0.136504	0.864856	0.069301	2.61918	0.0234471	1.62991	0.136562	1.02897	0.233772	0.631208	-0.0672607
HOXA10	P31260	Homeobox protein Hox-A10	15.4436	15.3951	15.1922	15.3652	15.4057	15.3309	15.41	15.2079	15.4761	0.441203	0.542346	0.265723	0.0700299	0.35838	0.579219	0.237157	0.0731792	0.0099617	0.987761	0.00534812	-0.00314935
HOXA11	P31270	Homeobox protein Hox-A11	15.8926	15.8426	15.9815	15.9394	15.915	15.8947	15.9362	15.9167	15.8243	0.47279	0.518836	0.28497	0.0313079	0.178972	0.765172	0.116241	0.0225547	0.0587169	0.930556	0.0312576	0.00875314
HOXC9	P31274	Homeobox protein Hox-C9	13.9737	14.0597	14.2475	13.9605	14.1036	14.2067	14.0274	14.0404	14.2731	1.35978	0.140363	0.852747	-0.0806875	3.0854	0.0163865	1.78551	-0.255259	2.53585	0.0346682	1.46007	0.174571
PRKAR1B	P31321	cAMP-dependent protein kinase type I-beta regulatory subunit	14.8344	15.0426	14.4109	15.0205	14.7899	14.4241	15.0063	14.4844	14.7374	0.454399	0.53251	0.273672	0.181451	1.60875	0.0844177	1.07357	0.429628	0.57046	0.460991	0.336307	-0.248178
PRKAR2B	P31323	cAMP-dependent protein kinase type II-beta regulatory subunit	18.2415	18.4885	18.5877	18.2723	18.4039	18.6519	18.3234	18.4135	18.5995	1.91897	0.0645143	1.19034	-0.156263	3.37769	0.0122916	1.91039	-0.333975	2.23097	0.0478163	1.32042	0.177711
CPS1	P31327	Carbamoyl-phosphate synthase [ammonia], mitochondrial	18.2583	18.3892	18.3241	18.1999	18.4226	18.328	18.1922	18.4901	18.3105	2.40632	0.0363404	1.43961	-0.217179	2.07421	0.0465969	1.33164	-0.104098	1.69909	0.0927627	1.03263	-0.113081
RRM2	P31350	Ribonucleoside-diphosphate reductase subunit M2	20.8225	20.8832	21.0583	20.9681	20.799	21.013	20.8283	20.9093	21.049	0.0541221	0.933913	0.0296935	0.00912094	1.55267	0.0909236	1.04132	-0.167141	2.09259	0.0561183	1.2509	0.176262
TIA1	P31483	Nucleolysin TIA-1 isoform p40	18.0369	18.228	18.2742	18.0277	18.2204	18.2914	18.0888	18.0661	18.344	1.00756	0.234935	0.629052	-0.120365	3.05502	0.0165775	1.78048	-0.252069	1.09104	0.213148	0.671319	0.131705
DNAJA1	P31689	DnaJ homolog subfamily A member 1	22.2704	22.1848	22.3721	22.3224	22.219	22.2884	22.3632	22.0669	22.4119	1.41331	0.130632	0.88395	0.161815	0.357128	0.580226	0.236403	-0.0387936	1.5708	0.109182	0.961848	0.200609
AKT1	P31749	RAC-alpha serine/threonine-protein kinase	18.2695	18.5426	18.4604	18.4107	18.4187	18.4339	18.2886	18.5659	18.4471	1.36707	0.138834	0.857505	-0.186139	1.2964	0.133958	0.873031	-0.12417	0.598584	0.443306	0.353296	-0.0619685
AKT2	P31751	RAC-beta serine/threonine-protein kinase	17.7629	17.8465	17.6908	17.8601	17.7703	17.7128	17.772	17.7963	17.7376	0.0550028	0.932794	0.0302142	-0.00609461	1.17606	0.159754	0.796547	0.0845757	1.59219	0.106406	0.973034	-0.0906703
UQCRC1	P31930	Cytochrome b-c1 complex subunit 1, mitochondrial	22.1444	22.2007	22.0514	22.135	22.2032	22.0401	22.2178	22.0183	22.1443	0.138931	0.83669	0.0774355	0.0250206	0.969297	0.218711	0.66013	0.0871563	0.374489	0.612448	0.21293	-0.0621357
HIBADH	P31937	3-hydroxyisobutyrate dehydrogenase, mitochondrial	20.2895	20.443	20.3487	20.3439	20.3734	20.4069	20.3448	20.2933	20.4445	0.394124	0.582722	0.234539	-0.043843	1.04251	0.195892	0.707983	-0.0739841	0.229506	0.748672	0.125708	0.0301412
ATIC	P31939	Bifunctional purine biosynthesis protein PURH;Phosphoribosylaminoimidazolecarboxamide formyltransferase;IMP cyclohydrolase	23.896	24.0186	23.9868	23.9184	23.9843	24.0289	23.9336	23.9922	24.0182	2.26401	0.042689	1.36968	-0.0823739	2.33289	0.0328152	1.48392	-0.0953217	0.32526	0.65518	0.183639	0.0129477
HNRNPH3	P31942	Heterogeneous nuclear ribonucleoprotein H3	21.9259	21.9824	22.0235	21.964	21.9624	21.9967	21.9826	21.8665	22.1041	0.198905	0.772839	0.111911	0.0204074	1.08506	0.183407	0.736585	-0.0839272	1.01604	0.238157	0.623137	0.104335
HNRNPH1	P31943	Heterogeneous nuclear ribonucleoprotein H;Heterogeneous nuclear ribonucleoprotein H, N-terminally processed	23.9457	24.0962	24.008	23.9446	24.1056	23.9746	24.0364	23.8925	24.0752	0.298871	0.671963	0.172654	-0.0558643	0.442426	0.502412	0.29894	-0.0436923	0.0555991	0.934216	0.0295525	-0.0121721
YWHAB	P31946	14-3-3 protein beta/alpha;14-3-3 protein beta/alpha, N-terminally processed	22.7533	22.7781	22.8693	22.7996	22.8334	22.7347	22.7862	22.6579	22.9047	0.162954	0.810717	0.0911305	0.0232328	0.454582	0.493468	0.306741	-0.0565281	0.471656	0.533031	0.273247	0.0797609
SFN	P31947	14-3-3 protein sigma	18.4023	18.9315	19.7915	18.0842	19.5932	19.3584	18.5243	19.7817	18.6456	1.71818	0.0848093	1.07156	-1.09854	1.21526	0.151009	0.820996	-0.928218	0.150515	0.828216	0.0818562	-0.170324
STIP1	P31948	Stress-induced-phosphoprotein 1	24.4153	24.3256	24.326	24.3973	24.4172	24.2189	24.533	24.0402	24.465	0.706022	0.366742	0.435639	0.187544	0.604416	0.38874	0.41034	0.111947	0.219792	0.757505	0.120615	0.0755965
S100A11	P31949	Protein S100-A11;Protein S100-A11, N-terminally processed	19.6223	19.5323	20.3239	19.7427	19.7301	19.9709	19.5776	20.0862	19.8758	0.328653	0.641581	0.192748	-0.135299	1.32219	0.128682	0.890483	-0.409332	0.576259	0.457131	0.33996	0.274033
INPP5B	P32019	Type II inositol 1,4,5-trisphosphate 5-phosphatase	15.4445	15.329	15.5685	15.523	15.3951	15.4693	15.3571	15.4659	15.5558	0.292286	0.677268	0.169239	0.0448437	0.717476	0.321704	0.492543	-0.089681	1.25441	0.168616	0.773102	0.134525
PRDX2	P32119	Peroxiredoxin-2	23.9522	23.8666	24.0659	23.9982	23.8925	23.9914	23.9772	23.8832	23.9823	2.46847	0.0338101	1.47095	0.0951532	0.558529	0.419252	0.377525	-0.0373338	2.06557	0.0581312	1.23559	0.132487
ARRB2	P32121	Beta-arrestin-2	17.6314	17.9011	17.8154	17.689	17.8173	17.8259	17.669	17.8586	17.8439	2.57409	0.0297225	1.52692	-0.195879	3.03185	0.0168674	1.77295	-0.165288	0.526358	0.493029	0.307127	-0.0305907
GK	P32189	Glycerol kinase;Putative glycerol kinase 3	18.8859	19.0555	19.311	18.9275	19.079	19.2644	18.9059	19.1608	19.2519	2.31182	0.0404279	1.39332	-0.192031	4.16053	0.00646613	2.18936	-0.369336	2.07623	0.0576534	1.23917	0.177305
OTX1	P32242	Homeobox protein OTX1	12.9815	13.4289	13.1071	13.1804	13.3811	12.8859	13.1555	13.3133	12.987	1.71311	0.0854338	1.06837	-0.268666	0.557167	0.419853	0.376903	0.112429	2.20927	0.049063	1.30925	-0.381095
DCTD	P32321	Deoxycytidylate deaminase	16.8831	17.3038	17.311	17.0694	17.2561	17.1451	16.9688	17.2156	17.3133	2.05699	0.0542853	1.26532	-0.284712	1.66207	0.0790479	1.10211	-0.282715	0.0107451	0.986801	0.00577041	-0.00199636
PYCR1	P32322	Pyrroline-5-carboxylate reductase 1, mitochondrial	21.7165	21.8472	21.8523	21.712	21.8123	21.93	21.6715	21.8801	21.8326	2.42155	0.0355477	1.44919	-0.146518	2.18544	0.0402806	1.3949	-0.171641	0.284365	0.695184	0.1579	0.025123
GTF2H1	P32780	General transcription factor IIH subunit 1	17.7553	17.8472	17.7115	17.7374	17.839	17.6758	17.731	17.8466	17.7104	3.73533	0.00947945	2.02322	-0.103018	1.41908	0.111005	0.954659	0.0420011	3.57099	0.0144013	1.8416	-0.14502
STX2	P32856	Syntaxin-2	13.357	13.5047	13.6087	13.5083	13.5477	13.4358	13.5067	13.3861	13.5213	0.115519	0.863176	0.0639007	-0.0221472	0.384085	0.55563	0.255215	-0.0645898	0.240923	0.74001	0.130762	0.0424426
CTH	P32929	Cystathionine gamma-lyase	20.3933	20.9598	20.946	20.3532	20.9669	20.9124	20.3863	20.9691	20.8882	5.88737	0.00355425	2.44925	-0.587641	4.87422	0.00569057	2.24484	-0.537909	1.36691	0.143788	0.842279	-0.0497316
RPL9	P32969	60S ribosomal protein L9	23.6959	23.7805	23.6807	23.6499	23.7638	23.7126	23.7554	23.556	23.8165	0.00120906	0.998571	0.000620914	0.000290553	0.285691	0.647006	0.189092	-0.0362027	0.165573	0.813255	0.0897733	0.0364933
ACSL1	P33121	Long-chain-fatty-acid--CoA ligase 1	19.7515	19.7118	19.7588	19.8136	19.6879	19.748	19.7429	19.792	19.7043	0.43031	0.552169	0.257928	0.0388076	0.509108	0.453342	0.343574	0.0323334	0.0631857	0.926895	0.0329694	0.00647418
KIF5B	P33176	Kinesin-1 heavy chain	22.7997	22.7441	22.7785	22.7944	22.7505	22.8017	22.8147	22.72	22.791	2.36719	0.0379787	1.42046	0.0647341	0.620663	0.377768	0.422775	0.0125173	1.9853	0.0644214	1.19097	0.0522168
CSTF2	P33240	Cleavage stimulation factor subunit 2	22.0877	22.0285	21.9345	22.0002	22.018	22.0313	22.0251	22.0817	21.9125	0.0531457	0.935042	0.029169	-0.00503794	0.808131	0.278919	0.554522	0.0782522	0.939231	0.266971	0.573536	-0.0832901
DUT	P33316	Deoxyuridine 5-triphosphate nucleotidohydrolase, mitochondrial	21.1648	21.3896	21.3248	21.1178	21.3639	21.3948	21.3064	21.137	21.4205	0.438401	0.544274	0.264183	-0.10047	1.35234	0.122996	0.91011	-0.18367	0.415432	0.577329	0.238576	0.0831998
ABCC1	P33527	Multidrug resistance-associated protein 1	18.1345	18.1271	18.3636	18.2595	17.9754	18.3211	18.2219	17.9198	18.4261	1.28507	0.156064	0.806697	0.197849	1.57961	0.0878201	1.05641	-0.164987	2.20194	0.0493911	1.30635	0.362836
CKS2	P33552	Cyclin-dependent kinases regulatory subunit 2	19.3272	19.3673	19.2626	19.6794	20.108	17.9129	19.6229	17.974	20.1121	0.244776	0.723303	0.14068	0.393398	0.276606	0.656838	0.182542	0.447286	0.0200489	0.975178	0.0109159	-0.0538883
MAN1A1	P33908	Mannosyl-oligosaccharide 1,2-alpha-mannosidase IA	16.9788	16.7705	16.8689	16.9277	16.7623	16.954	16.9101	16.8899	16.8529	1.33249	0.145384	0.837484	0.131298	0.554189	0.421814	0.374879	0.0469596	0.747391	0.355897	0.448675	0.0843385
TTK	P33981	Dual specificity protein kinase TTK	18.0632	18.0889	17.9832	18.1117	18.0191	18.057	18.0713	18.0182	18.0532	0.649584	0.399524	0.398457	0.0399907	0.835135	0.267863	0.572087	0.0509466	0.119049	0.862608	0.0641865	-0.0109558
MCM4	P33991	DNA replication licensing factor MCM4	23.26	23.2737	23.2229	23.2338	23.3031	23.2286	23.2569	23.2147	23.2917	0.191285	0.780618	0.107561	-0.0136274	0.0356855	0.94873	0.0228574	0.0024821	0.179682	0.798944	0.0974834	-0.0161095
MCM5	P33992	DNA replication licensing factor MCM5	23.2391	23.2339	23.1977	23.2468	23.2176	23.2118	23.2228	23.1938	23.2441	0.709032	0.364592	0.438193	0.02115	0.523306	0.444063	0.352555	0.0184015	0.0525416	0.937707	0.027933	0.00274849
MCM7	P33993	DNA replication licensing factor MCM7	23.2846	23.3494	23.3137	23.3002	23.3935	23.2587	23.332	23.2357	23.3878	0.157841	0.816246	0.0881789	-0.020654	0.133794	0.818919	0.0867593	-0.0144908	0.0346965	0.958948	0.0182051	-0.00616328
SDC2	P34741	Syndecan-2	18.6951	18.3673	18.4572	18.6745	18.4789	18.4544	18.6482	18.3634	18.5565	2.58692	0.0293632	1.5322	0.269376	2.14429	0.0422311	1.37437	0.183225	0.785413	0.335447	0.474376	0.0861511
SHMT1	P34896	Serine hydroxymethyltransferase, cytosolic	19.8481	20.0042	19.9624	19.887	19.9636	19.968	19.9043	19.9261	20.0082	1.41	0.13138	0.88147	-0.0848166	1.97549	0.0522923	1.28156	-0.0997359	0.216711	0.760514	0.118893	0.0149193
SHMT2	P34897	Serine hydroxymethyltransferase, mitochondrial	23.3172	23.5463	23.6268	23.3003	23.5813	23.5928	23.3356	23.5948	23.5725	3.87897	0.00847828	2.07169	-0.256424	3.91869	0.0078145	2.1071	-0.279664	0.468866	0.535117	0.271551	0.0232398
EPHX2	P34913	Bifunctional epoxide hydrolase 2;Cytosolic epoxide hydrolase 2;Lipid-phosphate phosphatase	15.4623	15.7077	15.9906	15.4887	15.8407	15.7995	15.3538	15.9941	15.803	1.95303	0.0616195	1.21028	-0.412584	2.32777	0.0329153	1.4826	-0.429429	0.0558674	0.933918	0.0296911	0.0168444
HSPA1L	P34931	Heat shock 70 kDa protein 1-like	14.4678	14.7349	14.5201	14.4774	14.8124	14.475	14.4501	14.6268	14.6466	2.05364	0.0544216	1.26423	-0.259618	0.723071	0.319472	0.495567	-0.0821466	1.12169	0.204633	0.689024	-0.177471
HSPA4	P34932	Heat shock 70 kDa protein 4	24.5094	24.5566	24.5815	24.4725	24.5711	24.599	24.5494	24.4633	24.6307	0.188472	0.783287	0.106079	-0.0199197	1.6146	0.0838142	1.07668	-0.0933348	0.935084	0.26866	0.570796	0.0734151
MPI	P34949	Mannose-6-phosphate isomerase	21.1933	21.2964	21.2325	21.1761	21.2433	21.3189	21.209	21.2533	21.2899	1.71807	0.0848093	1.07156	-0.0715237	1.49666	0.0981105	1.00828	-0.0876115	0.20636	0.770273	0.113356	0.0160878
GPC1	P35052	Glypican-1;Secreted glypican-1	15.7932	16.0336	16.0506	15.7667	15.9951	16.0799	15.7937	15.9987	16.0547	3.91691	0.00847828	2.07169	-0.224643	4.57328	0.00569057	2.24484	-0.277235	1.57919	0.107895	0.967	0.0525916
PFN2	P35080	Profilin-2	21.0009	21.201	21.1136	20.9686	21.1898	21.1377	21.0067	21.125	21.0822	2.60851	0.0285308	1.54469	-0.179858	2.40074	0.0299739	1.52326	-0.119095	0.994654	0.246157	0.608788	-0.0607624
CA8	P35219	Carbonic anhydrase-related protein	20.0549	20.4189	19.912	20.0802	20.322	19.925	20.0501	20.3279	19.9938	3.07464	0.0178725	1.74781	-0.294538	1.92098	0.0560448	1.25146	0.118099	3.28849	0.0177494	1.75082	-0.412637
CTNNA1	P35221	Catenin alpha-1	21.5242	21.5397	21.6257	21.5641	21.53	21.5877	21.5636	21.5324	21.5965	0.540365	0.470579	0.327367	0.0165844	1.40175	0.113754	0.944033	-0.0526937	2.3704	0.0421537	1.37516	0.0692781
CTNNB1	P35222	Catenin beta-1	20.6937	20.4862	20.61	20.7255	20.4802	20.5794	20.6886	20.516	20.5931	3.69751	0.00962119	2.01677	0.208467	2.76093	0.0208075	1.68178	0.108429	2.6736	0.0304952	1.51577	0.100038
BMI1	P35226	Polycomb complex protein BMI-1	20.0901	20.0271	19.9711	20.1089	20.0001	20.0053	20.037	20.032	20.0157	1.16783	0.18508	0.732641	0.0589237	1.48295	0.100394	0.998294	0.0812925	0.598157	0.443633	0.352976	-0.0223687
PCGF2	P35227	Polycomb group RING finger protein 2	12.3812	12.4512	12.4874	12.3734	12.3819	12.5319	12.3268	12.3531	12.5354	0.446263	0.538449	0.268855	-0.0349881	2.62915	0.0232333	1.63389	-0.157778	1.69074	0.0935837	1.0288	0.12279
PHB	P35232	Prohibitin	22.7832	22.8447	23.0469	22.8457	22.8421	22.973	22.8199	22.9066	22.9391	0.801328	0.321246	0.493162	-0.0482241	2.01291	0.0499985	1.30104	-0.170088	1.48018	0.123047	0.909928	0.121864
SERPINB6	P35237	Serpin B6	20.8203	20.8726	20.8909	20.9116	20.8403	20.8576	20.8395	20.814	20.9366	0.172355	0.800385	0.0967008	0.0148239	0.453357	0.494373	0.305945	-0.0378812	0.860145	0.297846	0.526009	0.0527051
NF2	P35240	Merlin	18.9739	18.905	18.7869	18.8606	18.9104	18.8528	18.9185	18.7581	18.8821	0.428612	0.553522	0.256865	0.0598291	0.82777	0.27084	0.567288	0.0770702	0.108759	0.874643	0.0581694	-0.0172412
RDX	P35241	Radixin	21.7046	21.5387	21.6251	21.7384	21.5452	21.5716	21.6872	21.5463	21.6317	3.40171	0.0125903	1.89996	0.166644	1.84446	0.0621384	1.20664	0.100559	1.5835	0.107304	0.969382	0.0660858
RPA3	P35244	Replication protein A 14 kDa subunit	21.5614	21.656	21.5913	21.5938	21.6597	21.5599	21.5203	21.6813	21.6324	2.03875	0.0554557	1.25605	-0.107217	0.531626	0.438101	0.358425	-0.0360775	1.47113	0.124153	0.906043	-0.071139
RFC4	P35249	Replication factor C subunit 4	21.2157	21.2759	21.3253	21.2508	21.3072	21.2743	21.2156	21.2852	21.3181	1.84707	0.0708255	1.14981	-0.0620925	1.78044	0.0673653	1.17156	-0.0784931	0.372413	0.613796	0.211976	0.0164007
RFC2	P35250	Replication factor C subunit 2	21.1466	21.2963	21.2479	21.198	21.2596	21.2366	21.1435	21.276	21.2836	2.29039	0.041553	1.3814	-0.114601	1.83523	0.0629445	1.20104	-0.093331	0.527971	0.492283	0.307785	-0.0212701
RFC1	P35251	Replication factor C subunit 1	20.6226	20.6746	20.6705	20.6016	20.6458	20.7012	20.6221	20.6534	20.6813	1.73591	0.0833171	1.07927	-0.0425072	2.4306	0.0291251	1.53573	-0.0689119	0.992806	0.246701	0.60783	0.0264047
RPL22	P35268	60S ribosomal protein L22	21.9664	21.9027	21.8578	21.9213	21.8555	21.9878	21.9535	21.9588	21.8172	0.561449	0.456098	0.340942	0.0414219	0.486856	0.469065	0.328767	0.0594578	0.109678	0.873756	0.0586097	-0.0180359
GTF2F1	P35269	General transcription factor IIF subunit 1	20.4481	20.4881	20.3703	20.3317	20.4658	20.4875	20.5071	20.3278	20.4541	0.00802069	0.990475	0.00415646	0.00175412	0.0454861	0.934462	0.0294385	-0.00827853	0.0567717	0.9327	0.0302579	0.0100327
SPR	P35270	Sepiapterin reductase	19.8206	19.6104	19.7843	19.8312	19.6019	19.7905	19.8178	19.7128	19.7419	2.14453	0.0488004	1.31158	0.181476	1.49212	0.0989283	1.00468	0.0509485	1.55148	0.112452	0.949033	0.130527
PTGS2	P35354	Prostaglandin G/H synthase 2	12.4274	12.0244	12.5756	12.5074	11.2392	13.1737	11.6152	12.3784	12.924	0.275502	0.692997	0.159268	0.302675	0.994933	0.210517	0.676714	-0.707759	1.25259	0.16903	0.772036	1.01043
HOXD13	P35453	Homeobox protein Hox-D13	16.8924	16.6806	16.5631	16.7803	16.7519	16.6411	16.8822	16.6209	16.7058	1.48624	0.117659	0.929376	0.167177	1.76921	0.0683953	1.16497	0.21497	0.355	0.629601	0.200935	-0.0477931
FAU	P35544	Ubiquitin-like protein FUBI	14.9954	15.3534	15.8953	15.2268	15.3076	15.6903	15.4537	14.7105	16.016	0.154365	0.819401	0.0865035	0.101465	1.77038	0.0682924	1.16563	-0.641911	1.50845	0.118266	0.92714	0.743376
FBN2	P35556	Fibrillin-2	12.934	13.0468	13.462	13.3022	12.9045	13.3814	12.9824	13.2408	13.3524	0.0195511	0.975517	0.0107652	0.00887775	1.27237	0.138584	0.858287	-0.32573	1.50503	0.118755	0.925347	0.334608
AGL	P35573	Glycogen debranching enzyme;4-alpha-glucanotransferase;Amylo-alpha-1,6-glucosidase	21.5581	21.677	21.6894	21.5955	21.6129	21.7291	21.5788	21.6329	21.7162	1.35976	0.140363	0.852747	-0.0634448	2.96273	0.0176118	1.7542	-0.134109	1.47219	0.124041	0.906434	0.0706647
MYH9	P35579	Myosin-9	25.0892	24.9479	25.0402	25.1282	24.9172	25.0291	25.1331	24.8719	25.0599	2.84487	0.0223737	1.65026	0.204482	1.95092	0.0539852	1.26772	0.0737832	2.26827	0.0461998	1.33536	0.130699
MYH10	P35580	Myosin-10	24.0799	24.076	24.0617	24.0673	24.0834	24.0732	24.1137	23.9982	24.1039	0.491048	0.50536	0.296399	0.0344486	0.146648	0.804873	0.0942725	0.00737826	0.378655	0.609046	0.21535	0.0270704
COPB2	P35606	Coatomer subunit beta	22.7929	22.8587	22.989	22.8651	22.8035	22.9739	22.795	22.9026	22.9441	0.427286	0.554174	0.256354	-0.0372105	2.29441	0.0343871	1.4636	-0.151313	1.64876	0.0986718	1.00581	0.114102
SOAT1	P35610	Sterol O-acyltransferase 1	19.3687	19.6848	19.6048	19.3229	19.6516	19.6647	19.4759	19.5354	19.6622	1.66755	0.0909116	1.04138	-0.234744	2.17365	0.0409121	1.38815	-0.254728	0.151179	0.827498	0.0822332	0.0199839
ADD1	P35611	Alpha-adducin	20.4516	20.5372	20.5074	20.4653	20.4932	20.5496	20.5126	20.4511	20.5743	0.218173	0.751341	0.124163	-0.0173416	1.17731	0.15957	0.797049	-0.0672607	0.723075	0.369265	0.432662	0.0499191
ADD2	P35612	Beta-adducin	18.0151	18.1212	18.1015	18.0252	18.1563	18.0668	18.0284	18.0646	18.1087	1.55459	0.107556	0.968363	-0.0911121	2.16519	0.0412876	1.38418	-0.0694453	0.296252	0.683525	0.165246	-0.0216668
BSG	P35613	Basigin	22.4754	22.7704	22.3431	22.4207	22.7179	22.4615	22.4875	22.5001	22.6302	1.11185	0.201438	0.695859	-0.201619	0.0696726	0.905645	0.0430421	-0.0170962	0.718573	0.371888	0.429587	-0.184523
TIMP3	P35625	Metalloproteinase inhibitor 3	17.3981	17.267	17.2631	17.2733	17.3197	17.3465	16.9759	17.2873	17.432	0.235556	0.73257	0.135151	-0.0755857	0.416348	0.52508	0.279774	-0.131439	0.473693	0.531462	0.274528	0.0558529
FUS	P35637	RNA-binding protein FUS	23.845	23.9365	23.7129	23.717	24.0001	23.7378	23.9251	23.5674	23.9184	0.0125539	0.983959	0.007023	-0.00562032	0.167513	0.77873	0.108613	0.0393829	0.108689	0.874643	0.0581694	-0.0450033
NUP214	P35658	Nuclear pore complex protein Nup214	21.6089	21.5308	21.5059	21.5881	21.5187	21.5487	21.6176	21.5393	21.5235	2.68295	0.0262718	1.58051	0.0752309	2.17977	0.0405635	1.39186	0.0788078	0.0924706	0.893676	0.0488199	-0.00357691
DEK	P35659	Protein DEK	22.8755	22.8403	22.8171	22.8287	22.8711	22.8646	22.8518	22.8621	22.8324	0.131773	0.846207	0.0725233	-0.0058403	0.290433	0.642729	0.191972	0.0139726	0.520224	0.497331	0.303354	-0.0198129
SOX5	P35711	Transcription factor SOX-5	13.5807	12.8616	13.5571	12.8748	13.305	13.7046	13.4705	13.1988	13.2978	0.29491	0.674863	0.170784	0.186858	0.351717	0.585327	0.232602	-0.21114	1.04523	0.227903	0.64225	0.397998
GLRX	P35754	Glutaredoxin-1	16.3746	16.3754	17.0726	16.4587	16.3623	16.9386	16.3894	16.4879	16.7819	0.00676113	0.991684	0.00362674	-0.000979106	2.39905	0.0300586	1.52203	-0.523525	2.30741	0.0443562	1.35305	0.522545
CHKA	P35790	Choline kinase alpha	16.6724	16.4844	16.4898	16.7074	16.4166	16.5643	16.6427	16.4215	16.5931	2.90077	0.0209803	1.67819	0.233319	1.59266	0.0861899	1.06454	0.125032	1.34173	0.149033	0.826718	0.108287
PPM1A	P35813	Protein phosphatase 1A	19.4617	19.4692	19.5902	19.3816	19.4941	19.6338	19.4946	19.3779	19.609	0.00741773	0.991226	0.00382728	-0.0010999	2.0003	0.0506922	1.29506	-0.165017	1.922	0.0697071	1.15672	0.163917
HMGCL	P35914	Hydroxymethylglutaryl-CoA lyase, mitochondrial	17.1287	17.4211	17.504	17.1385	17.4543	17.3665	17.1259	17.4504	17.4287	5.00864	0.00645066	2.1904	-0.310918	2.78599	0.0203386	1.69168	-0.30205	0.0758593	0.912897	0.0395781	-0.00886726
PSMC2	P35998	26S protease regulatory subunit 7	22.5952	22.6767	22.7263	22.5762	22.6887	22.7143	22.5882	22.6698	22.7121	3.52377	0.0109753	1.95958	-0.0919081	4.29666	0.00592863	2.22705	-0.131025	2.28212	0.0456296	1.34075	0.0391165
SLC16A2	P36021	Monocarboxylate transporter 8	13.7871	13.5712	13.3938	13.8645	13.3367	13.6419	13.7889	13.5166	13.8019	1.96482	0.0608207	1.21595	0.338626	0.761087	0.301319	0.520974	0.200937	0.425192	0.569515	0.244495	0.137689
ARL2	P36404	ADP-ribosylation factor-like protein 2	20.32	20.4613	20.2317	20.3751	20.4268	20.2031	20.2877	20.508	20.2464	1.78082	0.0779142	1.10838	-0.137721	1.61475	0.0838142	1.07668	0.100573	3.05709	0.0207165	1.68368	-0.238294
ARL3	P36405	ADP-ribosylation factor-like protein 3	19.7893	19.9373	19.9957	19.8104	19.8918	20.0142	19.8246	19.8857	20.0106	2.13622	0.0493429	1.30678	-0.0968469	4.15002	0.0065385	2.18452	-0.198744	2.38864	0.0412247	1.38484	0.101897
TRIM23	P36406	E3 ubiquitin-protein ligase TRIM23	16.5986	17.0909	17.0887	16.7411	17.1874	16.8302	16.8209	16.6073	17.3161	0.561951	0.455827	0.3412	-0.241685	1.08872	0.182211	0.739425	-0.358195	0.196522	0.779501	0.108183	0.11651
MAP2K2	P36507	Dual specificity mitogen-activated protein kinase kinase 2	21.4628	21.4626	21.4572	21.4636	21.47	21.4626	21.4078	21.523	21.4787	0.696165	0.371752	0.429747	-0.0405019	0.476502	0.477004	0.321478	-0.0214672	0.401074	0.588774	0.230051	-0.0190347
ATP5C1	P36542	ATP synthase subunit gamma, mitochondrial	22.2185	22.3471	22.4516	22.355	22.2312	22.3896	22.2845	22.2211	22.4808	0.126519	0.851326	0.0699044	0.0194925	1.50069	0.0975425	1.01081	-0.154694	1.63806	0.100035	0.999847	0.174186
ATP6V1E1	P36543	V-type proton ATPase subunit E 1	21.0949	20.9892	21.1386	21.1393	20.9943	21.1	21.1101	21.0143	21.1081	2.80516	0.0234004	1.63078	0.115513	0.0146828	0.979287	0.00909006	-0.000777562	2.93763	0.0231484	1.63548	0.11629
CPOX	P36551	Oxygen-dependent coproporphyrinogen-III oxidase, mitochondrial	22.0473	21.85	21.8003	22.0425	21.7958	21.8163	22.0529	21.7014	21.9289	2.43472	0.0348744	1.45749	0.265166	2.09669	0.0451167	1.34566	0.199077	0.484226	0.523619	0.280985	0.066089
RPL4	P36578	60S ribosomal protein L4	24.7704	24.8	24.8297	24.7862	24.7842	24.8201	24.8465	24.7724	24.8083	0.250905	0.718202	0.143753	0.0155137	0.312199	0.622913	0.205572	-0.0183296	1.54152	0.11368	0.944317	0.0338434
NUDT1	P36639	7,8-dihydro-8-oxoguanine triphosphatase	17.5693	17.56	17.8238	17.5858	17.5861	17.7415	17.5452	17.6453	17.7592	0.473271	0.518374	0.285357	-0.0303955	2.77644	0.0204999	1.68825	-0.208063	2.12592	0.0541405	1.26648	0.177668
LONP1	P36776	Lon protease homolog, mitochondrial	22.3187	22.4778	22.4753	22.3397	22.4532	22.4587	22.3174	22.5079	22.4317	3.05052	0.0182706	1.73825	-0.154393	3.05403	0.0165775	1.78048	-0.12998	0.529665	0.491006	0.308914	-0.0244128
PGM1	P36871	Phosphoglucomutase-1	22.5398	22.6311	22.6695	22.6702	22.4899	22.6677	22.5167	22.6509	22.6812	0.0760223	0.909931	0.0409916	-0.0150611	0.948738	0.225692	0.646485	-0.0972544	0.741097	0.359427	0.444389	0.0821934
PPP1CC	P36873	Serine/threonine-protein phosphatase PP1-gamma catalytic subunit	19.8197	19.5975	19.6007	19.7476	19.5965	19.6993	19.7571	19.6563	19.6438	2.20475	0.0457583	1.33953	0.158031	1.59737	0.0858729	1.06614	0.126851	0.376864	0.610808	0.214095	0.0311794
ACVR1B	P36896	Activin receptor type-1B	12.9346	12.6764	12.907	13.1766	12.3837	12.8811	12.7872	12.6719	12.97	1.22422	0.169286	0.77138	0.388799	0.14969	0.801034	0.096349	0.0468127	1.56723	0.109895	0.959024	0.341986
TGFBR1	P36897	TGF-beta receptor type-1	13.9768	14.0886	14.1299	14.0236	14.1259	14.0698	13.9969	14.0484	14.225	1.55809	0.107102	0.970204	-0.0885636	1.40764	0.112858	0.947469	-0.142467	0.462126	0.540289	0.267374	0.0539033
GNL1	P36915	Guanine nucleotide-binding protein-like 1	20.2716	20.5035	20.516	20.2334	20.4984	20.5254	20.2717	20.4816	20.5211	4.09162	0.00847828	2.07169	-0.235607	4.43995	0.00592863	2.22705	-0.261958	1.67719	0.0956234	1.01944	0.0263507
POLR2I	P36954	DNA-directed RNA polymerase II subunit RPB9	18.8883	18.8318	18.6546	18.8685	18.7813	18.6954	18.9019	18.7094	18.7552	1.417	0.130083	0.885779	0.112072	2.40894	0.0296332	1.52822	0.184523	0.720468	0.370878	0.430769	-0.0724506
SERPINF1	P36955	Pigment epithelium-derived factor	13.2755	13.405	14.0676	12.9921	13.5828	14.0611	13.0714	13.622	14.0235	1.76939	0.0792595	1.10095	-0.423626	3.40567	0.011994	1.92103	-0.937783	2.78165	0.0277752	1.55634	0.514158
DLST	P36957	Dihydrolipoyllysine-residue succinyltransferase component of 2-oxoglutarate dehydrogenase complex, mitochondrial	20.9386	21.048	21.1277	21.0073	21.102	20.989	20.9831	21.0678	21.0558	1.70656	0.0861754	1.06462	-0.0962677	0.840301	0.265723	0.575571	-0.0811284	0.129137	0.852802	0.0691519	-0.0151393
GMPR	P36959	GMP reductase 1	14.3157	14.0175	14.2053	14.224	14.118	14.1661	14.2089	14.1858	14.1444	1.13181	0.194814	0.71038	0.142435	0.9606	0.222053	0.653544	0.0775808	0.551993	0.47427	0.323974	0.0648546
GPX4	P36969	Phospholipid hydroperoxide glutathione peroxidase, mitochondrial	19.8831	19.9069	17.8944	20.0127	19.7741	17.7283	19.845	19.4888	18.2163	0.644595	0.402326	0.395422	0.190361	3.68722	0.00924766	2.03397	1.96729	3.14648	0.019069	1.71967	-1.77693
SRP14	P37108	Signal recognition particle 14 kDa protein	21.8356	21.7588	21.7077	21.8409	21.7624	21.7277	21.8509	21.7261	21.7794	2.78003	0.0239795	1.62016	0.0933533	2.05461	0.0475482	1.32287	0.104184	0.168338	0.811081	0.0909358	-0.0108312
NUP62	P37198	Nuclear pore glycoprotein p62	20.2029	20.4448	20.2989	20.2181	20.4545	20.3164	20.2707	20.1793	20.4991	0.628102	0.412269	0.384819	-0.129014	0.982236	0.214689	0.668189	-0.140931	0.0365071	0.956915	0.0191268	0.0119171
HPCAL1	P37235	Hippocalcin-like protein 1;Neuron-specific calcium-binding protein hippocalcin	17.6655	17.7336	17.8427	17.6543	17.6924	17.8293	17.7471	17.6197	17.8163	0.0552255	0.932574	0.0303169	0.00709216	2.0145	0.0499891	1.30112	-0.140499	1.90555	0.0709504	1.14905	0.147591
FDFT1	P37268	Squalene synthase	19.861	19.9423	19.91	19.9545	19.9114	19.8771	19.9413	19.8938	19.9175	0.0321677	0.959642	0.0178906	0.00309753	0.212435	0.727398	0.138228	0.017381	0.30922	0.670427	0.173649	-0.0142835
PIGA	P37287	Phosphatidylinositol N-acetylglucosaminyltransferase subunit A	13.546	14.9094	14.4243	14.3565	14.1817	14.4981	14.1143	14.575	14.3818	0.795492	0.32347	0.490166	-0.549781	0.819355	0.274381	0.561646	-0.429185	0.220737	0.757505	0.120615	-0.120597
TAGLN2	P37802	Transgelin-2	23.6293	23.7388	23.6505	23.6392	23.7269	23.6681	23.6092	23.7565	23.6481	3.13131	0.0171214	1.76646	-0.114865	1.28233	0.13694	0.863469	-0.0296561	2.87731	0.0247987	1.60557	-0.0852089
TALDO1	P37837	Transaldolase	23.8662	23.7768	23.7438	23.859	23.7479	23.7709	23.781	23.8144	23.7456	0.766978	0.335507	0.474298	0.0556552	1.33754	0.1255	0.901357	0.081955	0.550238	0.4754	0.322941	-0.0262998
SNCA	P37840	Alpha-synuclein	20.0026	19.8088	19.7368	20.0197	19.8369	19.6649	19.9533	19.7654	19.7478	2.54687	0.0304972	1.51574	0.188162	2.96111	0.0176118	1.7542	0.275373	1.2302	0.174413	0.758421	-0.0872103
ETFB	P38117	Electron transfer flavoprotein subunit beta	22.0938	21.9601	22.162	22.0619	22.0295	22.167	22.0496	22.065	22.1097	0.681633	0.379183	0.421151	0.0502389	1.58238	0.0874256	1.05836	-0.0777829	1.63149	0.101207	0.994791	0.128022
RBMX	P38159	RNA-binding motif protein, X chromosome;RNA-binding motif protein, X chromosome, N-terminally processed	23.8891	23.8997	23.7785	23.7971	23.9275	23.8356	23.9089	23.8375	23.8524	0.205996	0.76479	0.116458	-0.0231984	0.449117	0.497848	0.302904	0.0428632	0.885117	0.286555	0.542792	-0.0660617
BRCA1	P38398	Breast cancer type 1 susceptibility protein	16.439	16.8225	16.7011	16.4921	16.8912	16.6357	16.6561	16.502	16.918	0.69946	0.370189	0.431576	-0.209512	0.970121	0.218609	0.660332	-0.222523	0.0297433	0.965392	0.0152961	0.0130113
COIL	P38432	Coilin	20.6335	20.4503	20.4813	20.5949	20.4202	20.5416	20.6631	20.3925	20.538	2.89892	0.0209921	1.67794	0.209473	1.78043	0.0673653	1.17156	0.110203	1.74187	0.0879596	1.05572	0.0992692
GGCX	P38435	Vitamin K-dependent gamma-carboxylase	17.739	17.631	17.7467	17.7932	17.6646	17.6791	17.7738	17.6852	17.6743	2.07684	0.0532029	1.27406	0.108374	1.14251	0.16784	0.775104	0.0686232	0.635056	0.419531	0.377236	0.0397511
LIPA	P38571	Lysosomal acid lipase/cholesteryl ester hydrolase	18.4938	18.5801	18.7753	18.7317	18.4346	18.6087	18.4789	18.5694	18.7579	0.159445	0.81458	0.0890662	0.0400823	0.679894	0.342932	0.464791	-0.14583	1.23641	0.172874	0.762271	0.185912
ATP6V1A	P38606	V-type proton ATPase catalytic subunit A	22.0664	22.1025	22.1296	22.1579	22.0764	22.0906	22.1077	22.0352	22.1711	0.524765	0.482588	0.316423	0.0392818	0.218412	0.720453	0.142394	-0.019757	0.906423	0.278649	0.554942	0.0590388
HSPA9	P38646	Stress-70 protein, mitochondrial	24.8214	24.7529	24.7053	24.7622	24.7921	24.7316	24.8399	24.6971	24.7542	0.769853	0.334383	0.475755	0.0604954	1.32589	0.128125	0.892367	0.0774829	0.212728	0.764528	0.116606	-0.0169875
EIF4A3	P38919	Eukaryotic initiation factor 4A-III;Eukaryotic initiation factor 4A-III, N-terminally processed	24.1818	24.3449	24.3187	24.3631	24.2762	24.1995	24.235	24.2867	24.3182	0.299327	0.671426	0.173002	-0.0426591	0.101169	0.863643	0.0636657	-0.0188179	0.204519	0.771796	0.112497	-0.0238412
IGHMBP2	P38935	DNA-binding protein SMUBP-2	16.9918	16.9728	16.9197	16.9762	16.977	16.9395	17.0901	16.724	17.0744	0.635326	0.407919	0.389427	0.128105	0.276685	0.656834	0.182544	0.0415084	0.375473	0.61202	0.213234	0.0865968
RPS19	P39019	40S ribosomal protein S19	23.4351	23.235	23.1275	23.3369	23.3814	23.0511	23.3761	23.1165	23.293	0.780836	0.329703	0.481877	0.138419	1.36952	0.119526	0.922538	0.22552	0.344549	0.638662	0.194729	-0.0871003
RPL3	P39023	60S ribosomal protein L3	23.7254	23.7397	23.705	23.7481	23.7416	23.6518	23.7753	23.632	23.7363	0.507228	0.493285	0.306902	0.0451736	0.842444	0.264688	0.577265	0.0518589	0.0524908	0.937707	0.027933	-0.00668526
COL18A1	P39060	Collagen alpha-1(XVIII) chain;Endostatin	15.7412	15.3725	15.6841	15.6975	15.2995	15.7442	15.7256	15.3132	15.7553	3.96488	0.00847828	2.07169	0.393046	0.089518	0.88005	0.0554928	-0.00642904	3.6531	0.0136341	1.86537	0.399475
MPV17	P39210	Protein Mpv17	16.214	16.485	17.3517	16.6825	16.8051	16.4409	16.3599	17.2716	16.3746	0.748213	0.344714	0.462541	-0.43513	0.368914	0.569876	0.24422	-0.30362	0.123511	0.858035	0.0664949	-0.13151
DDOST	P39656	Dolichyl-diphosphooligosaccharide--protein glycosyltransferase 48 kDa subunit	21.9001	21.9278	22.0767	21.9679	21.8839	22.063	21.879	21.9765	22.0622	0.133485	0.843966	0.0736751	-0.0137227	2.29229	0.0345223	1.4619	-0.151615	2.15049	0.0525237	1.27964	0.137892
ANP32A	P39687	Acidic leucine-rich nuclear phosphoprotein 32 family member A	23.4029	23.3259	23.4126	23.2631	23.3847	23.4786	23.4416	23.1932	23.5257	0.361456	0.610519	0.214301	0.0679188	0.747372	0.30734	0.512381	-0.103135	1.22788	0.174984	0.757001	0.171054
FEN1	P39748	Flap endonuclease 1	22.2261	22.3426	22.353	22.2246	22.3599	22.3694	22.2845	22.2992	22.344	1.53406	0.11037	0.957149	-0.0888577	2.19836	0.0394427	1.40403	-0.110385	0.479004	0.526996	0.278193	0.0215276
CUX1	P39880	Homeobox protein cut-like 1	18.8838	18.4422	18.9758	18.8461	18.4754	18.9465	18.8856	18.4525	18.9442	4.8626	0.00686933	2.16309	0.415124	2.15756	0.0416505	1.38038	-0.0836849	5.41663	0.00611547	2.21357	0.498809
CAPG	P40121	Macrophage-capping protein	13.3985	13.5658	13.2903	13.1896	13.5432	13.3868	13.2318	13.149	13.425	0.415308	0.562983	0.249505	-0.146007	0.553172	0.422473	0.374201	-0.0940812	0.135738	0.845465	0.0729041	-0.0519257
CAP2	P40123	Adenylyl cyclase-associated protein 2	17.6821	17.7011	17.6974	17.6884	17.6933	17.7141	17.622	17.7919	17.7307	0.78257	0.329371	0.482315	-0.0645943	1.00764	0.206808	0.684433	-0.0499306	0.167259	0.812023	0.0904317	-0.0146637
IL6ST	P40189	Interleukin-6 receptor subunit beta	13.8433	13.0701	13.9833	13.9279	13.6809	13.4486	13.6233	13.7428	14.0512	0.573317	0.447716	0.348998	0.300259	0.0479423	0.931366	0.0308797	-0.029534	0.502244	0.509548	0.292815	0.329793
TXLNA	P40222	Alpha-taxilin	22.4898	22.4642	22.3299	22.5332	22.4572	22.2569	22.5182	22.3786	22.3507	1.24891	0.163516	0.786439	0.0804551	2.52944	0.0255979	1.5918	0.201247	1.42261	0.132505	0.877767	-0.120792
CCT6A	P40227	T-complex protein 1 subunit zeta	24.2839	24.3965	24.324	24.3083	24.3997	24.2998	24.3009	24.3804	24.326	3.26006	0.0150065	1.82372	-0.0944983	0.786197	0.288957	0.539166	-0.0188948	2.73331	0.0292061	1.53453	-0.0756035
VHL	P40337	Von Hippel-Lindau disease tumor suppressor	16.4941	16.6296	16.6252	16.3848	16.5952	16.6608	16.4885	16.3189	16.7557	0.219111	0.750796	0.124478	-0.0588201	1.8859	0.0586483	1.23174	-0.224788	0.717354	0.372471	0.428907	0.165968
PBX1	P40424	Pre-B-cell leukemia transcription factor 1	16.7607	17.0983	17.1076	16.8888	16.9668	17.117	16.9145	17.1702	16.884	1.37111	0.138366	0.858971	-0.223764	0.94607	0.226283	0.645349	-0.181524	0.164499	0.814586	0.0890629	-0.0422401
PBX2	P40425	Pre-B-cell leukemia transcription factor 2	18.4926	18.5878	18.4558	18.4291	18.5421	18.5642	18.5056	18.4867	18.5807	0.773717	0.332823	0.477786	-0.0631262	0.560286	0.418273	0.37854	-0.0577742	0.037119	0.956147	0.0194755	-0.00535202
PBX3	P40426	Pre-B-cell leukemia transcription factor 3	15.8138	15.8569	15.9346	15.7861	15.7041	16.0097	15.836	15.8924	15.8808	0.0329871	0.958809	0.018268	-0.00581964	1.4979	0.0979173	1.00914	-0.129721	0.835058	0.309786	0.508938	0.123901
RPL13A	P40429	60S ribosomal protein L13a	24.1747	24.0967	24.1165	24.1862	24.1133	24.0764	24.1146	24.2441	24.0358	0.0473155	0.939733	0.0269955	0.00713539	1.20221	0.154056	0.81232	0.082297	0.65233	0.408749	0.388543	-0.0751616
ARL1	P40616	ADP-ribosylation factor-like protein 1	19.1065	19.4569	19.4121	19.2684	19.4285	19.2485	19.1048	19.3768	19.4477	1.93659	0.0629201	1.20121	-0.260838	1.20272	0.153982	0.812531	-0.209548	0.320221	0.659997	0.180458	-0.0512892
STAT3	P40763	Signal transducer and activator of transcription 3	20.4211	20.4777	20.4463	20.5294	20.3969	20.4267	20.413	20.5278	20.4376	0.0862055	0.896752	0.0473275	-0.0130018	0.175875	0.768948	0.114103	0.017594	0.326051	0.654752	0.183923	-0.0305958
USP8	P40818	Ubiquitin carboxyl-terminal hydrolase 8	18.4159	18.2942	18.1928	18.3398	18.3167	18.2913	18.3869	18.3282	18.2318	1.3069	0.150957	0.821147	0.0678399	1.76544	0.0685694	1.16387	0.142213	1.15346	0.194659	0.710726	-0.0743732
PEX19	P40855	Peroxisomal biogenesis factor 19	20.8089	21.0747	20.8785	20.7788	21.083	20.869	20.9341	20.6703	21.0944	0.285419	0.684648	0.164533	-0.102072	0.537053	0.434215	0.362295	-0.106692	0.0098289	0.987761	0.00534812	0.00462023
MDH1	P40925	Malate dehydrogenase, cytoplasmic	22.7256	22.762	22.8356	22.7568	22.7631	22.79	22.735	22.7862	22.8143	1.20895	0.17375	0.760076	-0.0312964	2.0019	0.0505423	1.29634	-0.0741494	1.30871	0.156666	0.805024	0.042853
MDH2	P40926	Malate dehydrogenase, mitochondrial	24.8489	24.6733	24.9068	24.7893	24.6882	24.9406	24.8598	24.7067	24.8827	2.40624	0.0363404	1.43961	0.143277	1.31262	0.130654	0.883878	-0.0773951	3.46964	0.0159133	1.79824	0.220673
RFC5	P40937	Replication factor C subunit 5	20.9207	21.1362	21.145	21.0422	21.0047	21.1423	20.9671	21.0601	21.1495	0.802683	0.320984	0.493516	-0.0903238	2.05135	0.0477256	1.32125	-0.168941	0.964635	0.25658	0.590776	0.0786177
RFC3	P40938	Replication factor C subunit 3	20.5266	20.6617	20.6542	20.5617	20.632	20.6394	20.565	20.5846	20.6898	1.36875	0.138679	0.85799	-0.0750128	2.32572	0.0330008	1.48148	-0.110061	0.578882	0.455746	0.341277	0.0350482
HADHA	P40939	Trifunctional enzyme subunit alpha, mitochondrial;Long-chain enoyl-CoA hydratase;Long chain 3-hydroxyacyl-CoA dehydrogenase	23.3765	23.3674	23.3857	23.4414	23.3667	23.3597	23.3662	23.4095	23.3717	0.187892	0.783867	0.105758	0.0135059	0.379285	0.559965	0.251839	0.0223274	0.2142	0.763407	0.117244	-0.00882149
EIF2S3	P41091	Eukaryotic translation initiation factor 2 subunit 3;Putative eukaryotic translation initiation factor 2 subunit 3-like protein	22.5472	22.752	22.7736	22.5916	22.7688	22.7275	22.6043	22.7335	22.7762	2.97506	0.0197181	1.70514	-0.170357	2.79199	0.0202497	1.69358	-0.178043	0.152374	0.826519	0.082747	0.00768598
CETN2	P41208	Centrin-2	19.5068	19.7167	19.6074	19.7062	19.587	19.5456	19.6981	19.619	19.5937	0.0168593	0.978293	0.00953107	-0.00385857	0.333074	0.603962	0.21899	0.0547994	0.607742	0.437622	0.358901	-0.058658
EIF2D	P41214	Eukaryotic translation initiation factor 2D	19.3266	19.6127	19.6072	19.3287	19.5851	19.6049	19.4148	19.4933	19.6342	1.95488	0.0615546	1.21074	-0.206999	2.97221	0.0174639	1.75786	-0.258704	0.623626	0.426919	0.369655	0.051705
BUD31	P41223	Protein BUD31 homolog	19.277	19.4536	19.235	19.3073	19.4124	19.2765	19.3284	19.3512	19.308	1.41959	0.129719	0.886996	-0.101496	0.529379	0.439637	0.356906	0.0310904	1.65523	0.0979069	1.00919	-0.132587
NAA10	P41227	N-alpha-acetyltransferase 10	21.0967	21.196	21.143	21.1279	21.1836	21.1327	21.1051	21.1378	21.1859	1.45247	0.12334	0.908895	-0.062582	1.10108	0.178668	0.747953	-0.0439822	0.31608	0.664387	0.177579	-0.0185998
KDM5C	P41229	Lysine-specific demethylase 5C	18.2413	18.1525	18.0589	18.2314	18.0624	18.1562	18.169	18.2144	18.1009	0.64476	0.402273	0.395479	0.0707976	1.39972	0.114102	0.942708	0.108572	0.291978	0.688321	0.162209	-0.0377744
PPP1R2	P41236	Protein phosphatase inhibitor 2;Protein phosphatase inhibitor 2-like protein 3	19.0524	18.9539	18.974	18.9065	19.0164	18.9823	19.153	18.666	19.1285	0.540684	0.470348	0.327581	0.158532	0.0350513	0.949704	0.0224119	0.00905609	0.556933	0.470964	0.327012	0.149476
CSK	P41240	Tyrosine-protein kinase CSK	21.6397	21.6187	21.6594	21.6921	21.6011	21.6245	21.6489	21.6474	21.6439	0.834241	0.306028	0.514239	0.0378049	0.39015	0.549671	0.259897	0.0176156	0.527426	0.492574	0.307529	0.0201893
[truncated: 5,414 more rows]
