# Supplementary material for: Target deconvolution of HDAC pharmacopoeia highlights MBLAC2 as common off-target
Source: Research Square preprint supplement (doi:10.21203/rs.3.rs-646613/v1), 2021-07-12
Supplement: Supplementary file 9 [file 092d7d760218c0de62ec9210.xlsx]

## Sheet: Sheet1
metabolite	p-value	q-value	-log10(q-value)	log2 fold change (MBLAC2 siRNA/control siRNA)	MS-measurement mode
Adenosine 5'-monophosphate	0.179478	0.337344	0.471927	0.359959	pos
AHexCer 43:4;3O	0.0101023	0.0906313	1.04272	-0.134087	pos
AHexCer 46:1;3O	0.265629	0.425718	0.370878	0.196491	pos
beta-Nicotinamide adenine dinucleotide	0.315189	0.481501	0.317403	-0.211568	pos
CE 18:1	0.00644839	0.0906313	1.04272	1.27866	pos
CE 20:4	0.0103599	0.0906313	1.04272	1.38307	pos
Cer 31:4;2O|Cer 12:2;2O/19:2	0.96167	0.989225	0.00470476	-0.0310247	pos
Cer 34:1;2O|Cer 18:1;2O/16:0	0.0384658	0.0875428	1.05778	0.19747	neg
Cer 34:1;2O|Cer 18:1;2O/16:0	0.0338808	0.135147	0.869195	-0.240073	pos
Cer 36:1;2O|Cer 18:1;2O/18:0	0.0173735	0.0554642	1.25599	0.158502	neg
Cer 40:1;2O|Cer 18:1;2O/22:0	0.0558358	0.170759	0.767615	0.220937	pos
Cer 42:1;2O|Cer 18:1;2O/24:0	0.045997	0.161891	0.790776	0.363444	pos
Cer 42:2;2O|Cer 18:1;2O/24:1	0.0569553	0.116666	0.933057	0.412823	neg
Cer 42:2;2O|Cer 18:1;2O/24:1	0.214936	0.367438	0.434817	0.154418	pos
Cer 54:0;3O|Cer 17:0;2O/37:0;O	0.249786	0.407606	0.38976	0.303822	pos
Cer 72:3;4O	0.417508	0.584239	0.233409	0.273723	pos
CL 66:4|CL 32:2_34:2	0.859065	0.885911	0.0526098	-0.0221282	neg
CL 68:4|CL 34:2_34:2	0.176122	0.264182	0.578096	0.161243	neg
CL 70:4|CL 34:2_36:2	0.669523	0.724402	0.140021	0.0467908	neg
CoQ10	0.510297	0.66136	0.179562	0.0722835	pos
DG 20:0	0.750518	0.847283	0.0719713	0.0298851	pos
DG 25:4	0.331389	0.497776	0.302966	-0.209858	pos
DG 27:4	0.731652	0.836507	0.0775304	0.136271	pos
DG 28:0	0.180459	0.33742	0.471829	-0.100572	pos
DG 28:1	0.008122	0.0906313	1.04272	-0.294056	pos
DG 30:0	0.122876	0.270629	0.567625	0.0814916	pos
DG 30:1	0.046968	0.16213	0.790137	-0.125513	pos
DG 30:2	0.0923494	0.219918	0.65774	-0.405132	pos
DG 31:4	0.482026	0.645699	0.18997	0.167086	pos
DG 32:0	0.0375399	0.144369	0.840526	0.159598	pos
DG 32:0|DG 16:0_16:0	0.703345	0.830148	0.0808447	0.0686588	pos
DG 32:1	0.0861654	0.21889	0.659774	-0.158286	pos
DG 32:1|DG 16:0_16:1	0.149733	0.301989	0.520009	-0.278238	pos
DG 32:2	0.139136	0.291251	0.535732	-0.11859	pos
DG 32:3	0.556216	0.701902	0.153724	0.126894	pos
DG 33:0	0.26982	0.428964	0.367579	-0.102789	pos
DG 33:1	0.158855	0.311997	0.505849	-0.145256	pos
DG 34:0	0.0595741	0.175304	0.756208	0.306636	pos
DG 34:0|DG 16:0_18:0	0.158024	0.311997	0.505849	0.453216	pos
DG 34:1	0.00404455	0.0906313	1.04272	-0.135054	pos
DG 34:1|DG 16:0_18:1	0.0357689	0.14111	0.850442	-0.36203	pos
DG 34:2	0.0287671	0.125235	0.902273	-0.176685	pos
DG 34:2|DG 16:1_18:1	0.0225873	0.11108	0.954365	-0.493413	pos
DG 35:2	0.207977	0.3605	0.443094	-0.120251	pos
DG 36:0	0.00935957	0.0906313	1.04272	1.02587	pos
DG 36:1	0.0664275	0.186308	0.729768	0.251726	pos
DG 36:1|DG 18:0_18:1	0.571343	0.714677	0.14589	-0.109688	pos
DG 36:2	0.0156221	0.0906313	1.04272	-0.199647	pos
DG 36:2|DG 18:1_18:1	0.0171204	0.0975592	1.01073	-0.485712	pos
DG 36:3	0.0871409	0.21889	0.659774	-0.182497	pos
DG 36:4	0.582581	0.721126	0.141989	0.0753537	pos
DG 37:7	0.740792	0.841596	0.0748961	0.0595995	pos
DG 38:0	0.00898127	0.0906313	1.04272	0.666479	pos
DG 38:1	0.0153903	0.0906313	1.04272	1.06372	pos
DG 38:2	0.011867	0.0906313	1.04272	1.05621	pos
DG 38:3	0.0723694	0.199851	0.699294	0.593899	pos
DG 38:4	0.518874	0.667655	0.175448	0.189484	pos
DG 38:5	0.521599	0.668764	0.174727	-0.0293231	pos
DG 40:2	0.253024	0.411021	0.386136	0.168793	pos
DG 40:3	0.00748801	0.0906313	1.04272	1.4096	pos
DG 40:4	0.00766343	0.0906313	1.04272	1.55027	pos
DG 40:5	0.00589455	0.0906313	1.04272	1.35834	pos
DG 41:10	0.012872	0.0906313	1.04272	-0.489862	pos
DG 42:5	0.239302	0.39408	0.404415	0.203404	pos
DG 42:6	0.00869152	0.0906313	1.04272	1.23419	pos
DG 43:11	0.00162167	0.0582181	1.23494	-0.697455	pos
DG 44:9	0.967431	0.992308	0.00335371	-0.00573383	pos
DG 45:9	0.0120407	0.0906313	1.04272	-0.358267	pos
DG 46:0	0.758983	0.850537	0.0703067	0.0452423	pos
DG 47:11	0.000402939	0.0286195	1.54334	-0.750506	pos
DG 47:12	0.000789075	0.0354097	1.45088	-0.801885	pos
DG 47:7	0.890549	0.948685	0.0228778	-0.0132172	pos
DG 48:0	0.220493	0.373383	0.427846	0.227509	pos
DG 48:1	0.584534	0.721126	0.141989	-0.072448	pos
DG 49:1	0.997057	0.997057	0.00128006	-0.000856686	pos
DG 49:6	0.012651	0.0906313	1.04272	0.20223	pos
DG 49:7	0.574724	0.71641	0.144839	0.0313518	pos
DG 49:8	0.15904	0.311997	0.505849	-0.176099	pos
DG 50:0	0.0886768	0.21889	0.659774	0.382285	pos
DG 50:1	0.985025	0.994893	0.00222346	0.00309965	pos
DG 50:2	0.185031	0.342403	0.465462	-0.226749	pos
DG 50:9	0.0401839	0.150271	0.823125	0.254787	pos
DG 51:6	0.0305705	0.129115	0.889023	0.235366	pos
DG 51:7	0.939963	0.974011	0.0114362	0.00404366	pos
DG 51:8	0.0748571	0.203887	0.69061	-0.119069	pos
DG 51:9	0.114119	0.259296	0.586204	-0.328435	pos
DG 52:0	0.0254304	0.117005	0.931795	0.43043	pos
DG 52:1	0.625994	0.756673	0.121091	0.123538	pos
DG 52:10	0.00733593	0.0906313	1.04272	0.329397	pos
DG 52:2	0.0757371	0.204045	0.690274	-0.29896	pos
DG 52:3	0.454716	0.618345	0.208769	-0.0691234	pos
DG 52:9	0.000945954	0.0377331	1.42328	0.444384	pos
DG O-35:2|DG O-21:1_14:1	0.089266	0.21889	0.659774	-0.820674	pos
Dioctyl phthalate (also known as the production of plastic)	0.130847	0.284692	0.545624	0.130051	pos
DMPE 28:0|DMPE 14:0_14:0	0.22235	0.314467	0.502425	0.150908	neg
DMPE 30:0|DMPE 14:0_16:0	0.0917671	0.16824	0.774072	0.110486	neg
DMPE 30:1|DMPE 14:0_16:1	0.425301	0.516623	0.286826	-0.06504	neg
DMPE 32:0|DMPE 16:0_16:0	0.259947	0.350991	0.454704	0.113826	neg
DMPE 32:1|DMPE 16:0_16:1	0.614154	0.684626	0.164547	0.020697	neg
DMPE 32:2|DMPE 16:1_16:1	0.137636	0.225223	0.647387	-0.0933103	neg
DMPE 34:1|DMPE 16:0_18:1	0.0135144	0.0469448	1.32841	0.16624	neg
DMPE 34:2|DMPE 16:1_18:1	0.256096	0.350991	0.454704	-0.066795	neg
DMPE 36:2|DMPE 18:1_18:1	0.0187144	0.0559862	1.25192	-0.0903205	neg
Dodecylbenzenesulfonic acid	0.0544516	0.113489	0.945048	-0.59072	neg
FA 14:0	0.61928	0.685014	0.164301	0.0845068	neg
FA 15:4	0.398098	0.495745	0.304741	0.175865	neg
FA 16:0	0.611247	0.684626	0.164547	0.149355	neg
FA 18:0	0.506598	0.600638	0.221387	0.22338	neg
FA 18:1	0.66276	0.721025	0.14205	0.10486	neg
FA 20:4;4O	0.147355	0.237206	0.624874	-3.10158	neg
Glutathione	0.139541	0.291251	0.535732	-0.800131	pos
GM3 34:1;2O	0.0339104	0.0818812	1.08682	-0.258674	neg
GM3 42:2;2O	0.71996	0.770552	0.113198	0.106516	neg
HexCer 32:1;2O	0.00481581	0.0233432	1.63184	-0.64678	neg
HexCer 34:1;2O	0.0357356	0.0852263	1.06943	-0.422727	neg
HexCer 34:1;2O|HexCer 18:1;2O/16:0	0.000211733	0.00745063	2.12781	-0.48573	neg
HexCer 34:1;2O|HexCer 18:1;2O/16:0	0.0101466	0.0906313	1.04272	-0.593938	pos
HexCer 36:1;2O	0.00350174	0.0200435	1.69803	-0.35242	neg
HexCer 38:1;2O	0.00354305	0.0200435	1.69803	-0.382493	neg
HexCer 40:1;2O	0.00133324	0.0146657	1.8337	-0.213536	neg
HexCer 40:1;2O|HexCer 18:1;2O/22:0	0.043702	0.156379	0.805822	-0.252999	pos
HexCer 40:2;2O	0.00100967	0.0124947	1.90327	-0.754936	neg
HexCer 42:1;2O	0.944687	0.950864	0.0218815	-0.0036281	neg
HexCer 42:1;2O|HexCer 18:1;2O/24:0	0.0503637	0.164369	0.784181	-0.139894	pos
HexCer 42:2;2O	0.369627	0.468011	0.329744	-0.125488	neg
HexCer 42:2;2O|HexCer 18:1;2O/24:1	0.0629986	0.180932	0.742485	-0.150121	pos
HexCer 44:6;4O	0.000375948	0.00951863	2.02143	-0.722275	neg
HexCer 50:6;4O	0.00339613	0.0200435	1.69803	-0.541942	neg
HexCer 52:7;4O	0.3711	0.468011	0.329744	-0.218673	neg
LPC 14:0	0.762877	0.850537	0.0703067	-0.0903462	pos
LPC 16:0	0.0248745	0.0659654	1.18068	0.283238	neg
LPC 16:0	0.153582	0.308021	0.51142	0.471776	pos
LPC 16:0/0:0	0.710514	0.830148	0.0808447	0.0545746	pos
LPC 16:1	0.610551	0.745537	0.127531	-0.139909	pos
LPC 18:0	0.0519201	0.11052	0.95656	0.405058	neg
LPC 18:0	0.0132517	0.0906313	1.04272	0.498107	pos
LPC 18:0/0:0	0.031536	0.130529	0.884293	0.337501	pos
LPC 18:1	0.0507206	0.110359	0.957192	0.263899	neg
LPC 18:1	0.321019	0.48833	0.311287	0.171175	pos
LPC 20:1	0.0102661	0.0906313	1.04272	-0.421825	pos
LPC 26:0	0.960572	0.989225	0.00470476	-0.0100522	pos
LPC 28:0	0.503635	0.657981	0.181787	0.0544342	pos
LPC 28:1	0.127524	0.279153	0.554157	-0.291049	pos
LPC O-16:0	0.086481	0.21889	0.659774	0.140927	pos
LPE 16:0	0.822509	0.85487	0.0680998	-0.0319089	neg
LPE 16:0	0.472956	0.638313	0.194967	-0.11347	pos
LPE 18:0	0.0179278	0.0554642	1.25599	0.183925	neg
LPE 18:0	0.422272	0.585311	0.232613	0.0642833	pos
LPE 18:1	0.409256	0.503309	0.298166	0.0786167	neg
LPE 18:1	0.0683564	0.190232	0.720716	-0.334448	pos
LPE O-16:1	0.180127	0.268158	0.571609	-0.163233	neg
LPE O-16:1	0.0796531	0.211818	0.674037	-0.312489	pos
LPE O-18:1	0.466221	0.556095	0.254851	-0.0744188	neg
LPE O-18:1	0.562273	0.705791	0.151324	-0.114626	pos
LPE O-18:2	0.0404715	0.0900377	1.04558	-0.409521	neg
LPE O-18:2	0.00676136	0.0906313	1.04272	-0.398612	pos
LPI 16:0	0.198794	0.28942	0.538471	0.21419	neg
LPI 18:0	0.0257523	0.0670915	1.17333	0.225474	neg
LPI 18:1	0.139182	0.225886	0.646111	-0.169487	neg
LPS 18:0	0.151192	0.239488	0.620717	-0.336476	neg
MGDG 32:1|MGDG 16:0_16:1	0.00181688	0.0150294	1.82306	-0.600805	neg
MGDG 34:1|MGDG 16:0_18:1	0.00232304	0.0176908	1.75225	-0.571221	neg
MGDG 34:2|MGDG 16:1_18:1	0.00173311	0.0150294	1.82306	-0.960505	neg
MGDG O-30:0|MGDG O-14:0_16:0	0.00323529	0.0200184	1.69857	-0.275426	neg
MGDG O-32:0|MGDG O-16:0_16:0	0.224878	0.314899	0.501828	-0.133206	neg
MMPE 34:1|MMPE 16:0_18:1	0.588363	0.669517	0.174238	0.0403999	neg
NAE 14:0	0.738285	0.84141	0.0749921	-0.114453	pos
NAE 15:0	0.202892	0.3605	0.443094	0.807532	pos
NAE 16:0	0.723778	0.830148	0.0808447	-0.0589928	pos
NAE 17:0	0.110483	0.254254	0.594733	1.16918	pos
NAE 22:3	0.00252126	0.0822847	1.08468	2.11558	pos
NAE 22:4	0.0148747	0.0906313	1.04272	0.975524	pos
NAE 8:0	0.539887	0.685005	0.164307	-0.136114	pos
PC 18:0	0.00455413	0.0906313	1.04272	1.53651	pos
PC 26:0	0.0439952	0.156379	0.805822	0.370324	pos
PC 28:0	0.0257477	0.117005	0.931795	0.196502	pos
PC 28:0|PC 14:0_14:0	0.024087	0.0659654	1.18068	0.263389	neg
PC 28:0|PC 14:0_14:0	0.0577413	0.174194	0.758966	0.166565	pos
PC 28:1	0.102435	0.237254	0.624787	0.197055	pos
PC 29:0	0.598105	0.735341	0.133511	-0.0503228	pos
PC 30:0	0.500897	0.657981	0.181787	0.0679909	pos
PC 30:0|PC 14:0_16:0	0.00534919	0.0235775	1.6275	0.1331	neg
PC 30:0|PC 14:0_16:0	0.488553	0.648867	0.187844	-0.0301891	pos
PC 30:1	0.0895832	0.21889	0.659774	0.0439725	pos
PC 30:1|PC 14:0_16:1	0.131364	0.21675	0.664041	0.046597	neg
PC 30:1|PC 14:0_16:1	0.221912	0.374021	0.427104	-0.0284085	pos
PC 30:2	0.329999	0.497772	0.302969	0.0994981	pos
PC 31:0	0.721338	0.830148	0.0808447	-0.0202505	pos
PC 31:0|PC 15:0_16:0	0.0418383	0.0920443	1.036	0.0864914	neg
PC 31:0|PC 15:0_16:0	0.376551	0.542899	0.265281	-0.0742476	pos
PC 31:1	0.429405	0.590638	0.228679	-0.0493504	pos
PC 31:1|PC 15:0_16:1	0.157908	0.248141	0.605302	0.0934706	neg
PC 31:1|PC 15:0_16:1	0.145943	0.296552	0.5279	-0.19915	pos
PC 31:2	0.0195574	0.103252	0.986104	-0.203647	pos
PC 32:0	0.818548	0.898651	0.0464091	-0.0426002	pos
PC 32:0|PC 16:0_16:0	0.688394	0.740771	0.130316	0.020584	neg
PC 32:0|PC 16:0_16:0	0.477502	0.642034	0.192442	-0.070418	pos
PC 32:1	0.37114	0.537254	0.26982	0.139921	pos
PC 32:1;O|PC 16:1_16:0;O	0.647838	0.712622	0.147141	-0.028116	neg
PC 32:1|PC 16:0_16:1	0.0366779	0.085438	1.06835	0.114126	neg
PC 32:1|PC 16:0_16:1	0.986122	0.994893	0.00222346	0.000667423	pos
PC 32:2	0.138191	0.291251	0.535732	-0.073578	pos
PC 32:2|PC 16:1_16:1	0.65616	0.717788	0.144004	-0.0304351	neg
PC 32:2|PC 16:1_16:1	0.172101	0.328639	0.48328	-0.111725	pos
PC 32:3	0.0146591	0.0906313	1.04272	0.225079	pos
PC 33:0	0.913455	0.956065	0.0195128	0.0109912	pos
PC 33:0|PC 16:0_17:0	0.310631	0.476567	0.321876	-0.16895	pos
PC 33:1	0.0749668	0.203887	0.69061	-0.152258	pos
PC 33:1|PC 16:0_17:1	0.208159	0.298664	0.524818	0.0332187	neg
PC 33:1|PC 16:0_17:1	0.261689	0.421284	0.375425	-0.130147	pos
PC 33:1|PC 17:0_16:1	0.116312	0.198533	0.702168	-0.0533948	neg
PC 33:2	0.635714	0.763282	0.117315	-0.092911	pos
PC 33:2|PC 16:1_17:1	0.225837	0.314899	0.501828	-0.0898468	neg
PC 33:2|PC 16:1_17:1	0.18495	0.342403	0.465462	-0.165887	pos
PC 34:0	0.428747	0.590638	0.228679	0.0869634	pos
PC 34:0|PC 16:0_18:0	0.0307416	0.0770486	1.11324	0.25894	neg
PC 34:0|PC 16:0_18:0	0.277288	0.432811	0.363702	0.0946423	pos
PC 34:1	0.583391	0.721126	0.141989	0.11192	pos
PC 34:1;O|PC 18:1_16:0;O	0.423309	0.516623	0.286826	-0.04144	neg
PC 34:1|PC 16:0_18:1	0.00291575	0.0186232	1.72995	0.147822	neg
PC 34:1|PC 16:0_18:1	0.362075	0.528394	0.277042	0.0302722	pos
PC 34:2	0.226974	0.378994	0.421368	-0.0736581	pos
PC 34:2|PC 16:1_18:1	0.579063	0.666596	0.176137	-0.0110785	neg
PC 34:2|PC 16:1_18:1	0.0550584	0.170524	0.768215	-0.117078	pos
PC 34:3	0.304853	0.469709	0.328171	-0.166394	pos
PC 34:3|PC 16:1_18:2	0.432338	0.521969	0.282355	-0.0861718	neg
PC 34:3|PC 16:1_18:2	0.0410232	0.150982	0.821075	-0.356385	pos
PC 35:0	0.779205	0.866051	0.0624563	0.0588169	pos
PC 35:1	0.2751	0.43127	0.365251	0.0485332	pos
PC 35:1|PC 17:0_18:1	0.566037	0.659267	0.180939	-0.0380885	neg
PC 35:1|PC 17:0_18:1	0.202823	0.3605	0.443094	-0.119654	pos
PC 35:1|PC 18:0_17:1	0.0129204	0.0465134	1.33242	0.233385	neg
PC 35:2	0.121909	0.270629	0.567625	-0.141891	pos
PC 35:2|PC 17:1_18:1	0.189989	0.278651	0.55494	-0.0838669	neg
PC 35:2|PC 17:1_18:1	0.134598	0.289346	0.538582	-0.223944	pos
PC 35:3	0.379212	0.544548	0.263964	-0.127927	pos
PC 35:3;O|PC 18:1_17:2;O	0.00283332	0.0186232	1.72995	0.25643	neg
PC 35:4;O|PC 18:2_17:2;O	0.608833	0.684626	0.164547	-0.0445467	neg
PC 36:0	0.115391	0.260537	0.584131	0.262514	pos
PC 36:1	0.000478321	0.0286195	1.54334	0.16641	pos
PC 36:1|PC 16:0_20:1	8.13209e-05	0.0286195	1.54334	0.193108	pos
PC 36:1|PC 18:0_18:1	0.000477966	0.00951863	2.02143	0.369968	neg
PC 36:2	0.870365	0.93808	0.0277601	-0.0208883	pos
PC 36:2|PC 18:1_18:1	0.0287809	0.0730592	1.13632	-0.0879558	neg
PC 36:2|PC 18:1_18:1	0.0058946	0.0906313	1.04272	-0.265921	pos
PC 36:3	0.00920946	0.0906313	1.04272	-0.108447	pos
PC 36:3|PC 18:1_18:2	0.259115	0.350991	0.454704	-0.0333177	neg
PC 36:3|PC 18:1_18:2	0.327491	0.496072	0.304455	-0.120799	pos
PC 36:4	0.0146973	0.0906313	1.04272	0.392024	pos
PC 36:4|PC 16:0_20:4	0.0328107	0.080204	1.0958	0.663858	neg
PC 36:4|PC 18:2_18:2	0.0539892	0.170524	0.768215	-0.18498	pos
PC 36:5	0.0814682	0.21452	0.668532	0.227259	pos
PC 37:1	0.232562	0.386527	0.41282	-0.119619	pos
PC 37:2|PC 18:1_19:1	0.00676962	0.0285188	1.54487	-0.193167	neg
PC 37:2|PC 18:1_19:1	0.0142145	0.0906313	1.04272	-0.349006	pos
PC 37:6|PC 15:0_22:6	0.132731	0.28705	0.542042	0.151861	pos
PC 38:1	0.0994616	0.232429	0.633709	0.175629	pos
PC 38:2	0.00979178	0.0906313	1.04272	-0.400985	pos
PC 38:2|PC 18:1_20:1	0.00515414	0.0235775	1.6275	-0.257777	neg
PC 38:2|PC 18:1_20:1	0.0105587	0.0906313	1.04272	-0.401346	pos
PC 38:3	0.0256309	0.117005	0.931795	0.411661	pos
PC 38:3|PC 18:1_20:2	0.0871966	0.164428	0.784025	-0.138099	neg
PC 38:3|PC 18:1_20:2	0.048983	0.162823	0.788284	-0.271383	pos
PC 38:4	0.0604788	0.176519	0.753208	0.648537	pos
PC 38:4|PC 16:0_22:4	0.0579541	0.117091	0.931477	0.423759	neg
PC 38:4|PC 18:0_20:4	0.0236044	0.0658262	1.1816	1.14711	neg
PC 38:4|PC 18:1_20:3	0.000436633	0.0286195	1.54334	0.167976	pos
PC 38:5	0.0550708	0.170524	0.768215	0.620238	pos
PC 38:5|PC 16:0_22:5	0.0398902	0.0897529	1.04695	0.649387	neg
PC 38:5|PC 18:1_20:4	0.0520277	0.16827	0.773994	0.525566	pos
PC 38:6	0.0287898	0.125235	0.902273	0.414295	pos
PC 38:6|PC 16:0_22:6	0.0154227	0.0517576	1.28603	0.808399	neg
PC 38:6|PC 16:0_22:6	0.0135744	0.0906313	1.04272	0.648299	pos
PC 38:7	0.017875	0.100268	0.998839	0.221177	pos
PC 39:2	0.0144429	0.0906313	1.04272	-0.267739	pos
PC 40:1	0.0244214	0.115359	0.937949	0.32578	pos
PC 40:10	0.53161	0.679175	0.168018	0.0765334	pos
PC 40:2	0.170532	0.328639	0.48328	0.100115	pos
PC 40:2|PC 18:1_22:1	0.101442	0.18095	0.742442	0.331495	neg
PC 40:2|PC 18:1_22:1	0.033029	0.133229	0.8754	0.346288	pos
PC 40:3	0.00056625	0.0290405	1.537	-0.515099	pos
PC 40:4	0.00821707	0.0906313	1.04272	0.697492	pos
PC 40:5	0.0115868	0.0906313	1.04272	1.02338	pos
PC 40:6	0.0277654	0.124597	0.904491	0.765867	pos
PC 40:6|PC 18:0_22:6	0.0224759	0.0644961	1.19047	1.11368	neg
PC 40:7	0.0126017	0.0906313	1.04272	0.288101	pos
PC 42:1	0.00341897	0.089346	1.04892	0.452367	pos
PC 42:2	0.0378014	0.144369	0.840526	0.245397	pos
PC 44:2	0.0125156	0.0906313	1.04272	0.213728	pos
PC 46:2	0.823146	0.900944	0.0453023	0.0191017	pos
PC 48:2	0.0637116	0.181527	0.741058	0.101007	pos
PC 50:2	0.0896323	0.21889	0.659774	0.139723	pos
PC O-29:0	0.0969098	0.228886	0.640381	-0.255769	pos
PC O-30:0	0.392288	0.558854	0.252701	0.127066	pos
PC O-30:0|PC O-16:0_14:0	0.00419477	0.0218435	1.66068	0.331131	neg
PC O-30:1	0.0823354	0.21452	0.668532	0.134233	pos
PC O-30:1|PC O-16:1_14:0	0.00079669	0.0121342	1.91599	-0.414105	neg
PC O-31:0	0.504025	0.657981	0.181787	0.0550036	pos
PC O-32:0	0.941453	0.974011	0.0114362	0.00953726	pos
PC O-32:0|PC O-16:0_16:0	0.091129	0.16824	0.774072	0.208656	neg
PC O-32:1	0.622695	0.755744	0.121625	0.0415792	pos
PC O-32:1|PC O-16:0_16:1	0.00530651	0.0235775	1.6275	0.226678	neg
PC O-32:1|PC O-16:1_16:0	0.20429	0.295252	0.529808	-0.0160458	neg
PC O-32:2	0.205042	0.3605	0.443094	-0.142646	pos
PC O-32:3	0.143139	0.295328	0.529696	0.122794	pos
PC O-32:6	0.225568	0.378406	0.422042	-0.627763	pos
PC O-33:0	0.723518	0.830148	0.0808447	-0.0431064	pos
PC O-33:0|PC O-16:0_17:0	0.174314	0.264182	0.578096	0.10128	neg
PC O-33:1	0.420012	0.584435	0.233264	-0.103172	pos
PC O-33:2	0.189655	0.349159	0.456976	-0.24808	pos
PC O-33:6	0.39391	0.558948	0.252629	-0.0770265	pos
PC O-33:9	0.207366	0.3605	0.443094	0.167595	pos
PC O-34:0	0.166994	0.325821	0.487021	0.316776	pos
PC O-34:0|PC O-18:0_16:0	0.0520311	0.11052	0.95656	0.418991	neg
PC O-34:1	0.435665	0.596961	0.224054	-0.0702059	pos
PC O-34:1|PC O-16:0_18:1	0.212393	0.302546	0.519209	0.106177	neg
PC O-34:2	0.0925002	0.219918	0.65774	-0.157165	pos
PC O-34:3	0.053451	0.170524	0.768215	-0.271254	pos
PC O-34:4;2O|PC O-16:2_18:2;2O	0.0189448	0.0559862	1.25192	-0.239716	neg
PC O-35:0	0.695397	0.82392	0.0841151	-0.085232	pos
PC O-35:1	0.974558	0.994893	0.00222346	0.00429089	pos
PC O-35:6	0.489813	0.648867	0.187844	-0.0687452	pos
PC O-35:7	0.0209454	0.104436	0.981149	-0.20605	pos
PC O-35:9	0.804185	0.888315	0.0514329	0.0222601	pos
PC O-36:0	0.171693	0.328639	0.48328	0.31023	pos
PC O-36:1	0.72208	0.830148	0.0808447	0.0588803	pos
PC O-36:1|PC O-18:0_18:1	0.096317	0.174117	0.75916	0.220152	neg
PC O-36:2	0.0412358	0.150982	0.821075	-0.232036	pos
PC O-36:2|PC O-18:1_18:1	0.285034	0.381329	0.418701	-0.0489781	neg
PC O-36:3	0.35032	0.517551	0.286047	-0.117819	pos
PC O-36:3|PC O-18:2_18:1	0.0182696	0.0556521	1.25452	-0.121464	neg
PC O-36:4	0.645198	0.772087	0.112334	0.0346267	pos
PC O-36:5	0.0193434	0.103252	0.986104	-0.181971	pos
PC O-36:6	0.754521	0.849132	0.0710246	0.0778847	pos
PC O-37:1	0.031996	0.130529	0.884293	-0.347334	pos
PC O-37:10	0.760757	0.850537	0.0703067	0.0751025	pos
PC O-37:6	0.0147285	0.0906313	1.04272	0.240075	pos
PC O-37:7	0.460838	0.624304	0.204604	-0.109247	pos
PC O-38:0	0.271501	0.429378	0.36716	0.282012	pos
PC O-38:1	0.744826	0.84351	0.0739098	0.0366229	pos
PC O-38:2	0.0416357	0.150982	0.821075	-0.318866	pos
PC O-38:3	0.0188553	0.103252	0.986104	-0.308262	pos
PC O-38:6	0.144665	0.296552	0.5279	-0.137119	pos
PC O-38:7	0.208869	0.3605	0.443094	0.308765	pos
PC O-39:10	0.631911	0.761262	0.118466	0.110784	pos
PC O-39:2	0.0366188	0.142893	0.84499	-0.821704	pos
PC O-39:3	0.0663896	0.186308	0.729768	-0.377895	pos
PC O-39:9	0.718517	0.830148	0.0808447	-0.0316939	pos
PC O-40:1	0.920261	0.957604	0.0188139	0.00900545	pos
PC O-40:2	0.488551	0.648867	0.187844	-0.0506414	pos
PC O-40:4	0.977152	0.994893	0.00222346	0.0052398	pos
PC O-40:8	0.62312	0.755744	0.121625	0.145138	pos
PC O-42:2	0.339623	0.505912	0.295925	0.120282	pos
PE 32:0|PE 16:0_16:0	0.174597	0.264182	0.578096	0.114571	neg
PE 32:0|PE 16:0_16:0	0.721569	0.830148	0.0808447	-0.0359565	pos
PE 32:1	0.876	0.938758	0.0274461	0.00827378	pos
PE 32:1|PE 16:0_16:1	0.12027	0.203535	0.691362	0.0520076	neg
PE 32:1|PE 16:0_16:1	0.336925	0.503984	0.297583	-0.0880869	pos
PE 32:2|PE 16:1_16:1	0.0377495	0.0869116	1.06092	-0.135278	neg
PE 32:2|PE 16:1_16:1	0.246136	0.403483	0.394174	-0.111747	pos
PE 34:0	0.390662	0.558756	0.252778	0.10569	pos
PE 34:1	0.358222	0.527056	0.278143	-0.0811392	pos
PE 34:1|PE 16:0_18:1	0.0249869	0.0659654	1.18068	0.0888416	neg
PE 34:1|PE 16:0_18:1	0.514281	0.664126	0.177749	-0.074548	pos
PE 34:2|PE 16:1_18:1	0.319519	0.41081	0.386359	-0.0222633	neg
PE 34:2|PE 16:1_18:1	0.0997051	0.232429	0.633709	-0.170479	pos
PE 34:3|PE 16:1_18:2	0.270044	0.428964	0.367579	-0.163292	pos
PE 35:1|PE 17:0_18:1	0.899542	0.948964	0.0227503	0.00831668	pos
PE 35:2|PE 17:1_18:1	0.108155	0.187848	0.726194	-0.0604183	neg
PE 35:2|PE 17:1_18:1	0.367944	0.534784	0.271821	-0.103633	pos
PE 36:1	0.142078	0.294833	0.530424	0.229609	pos
PE 36:1|PE 18:0_18:1	0.00287996	0.0186232	1.72995	0.309246	neg
PE 36:1|PE 18:0_18:1	0.206417	0.3605	0.443094	0.185406	pos
PE 36:2	0.862583	0.932733	0.0302426	0.0183957	pos
PE 36:2|PE 18:1_18:1	0.167301	0.260831	0.583641	0.249423	neg
PE 36:2|PE 18:1_18:1	0.718898	0.830148	0.0808447	0.023965	pos
PE 36:3|PE 16:0_20:3	0.316245	0.409443	0.387807	0.183574	neg
PE 36:3|PE 18:1_18:2	0.128474	0.213763	0.670067	-0.0726179	neg
PE 36:4|PE 16:0_20:4	0.824647	0.85487	0.0680998	0.0114602	neg
PE 37:2|PE 18:1_19:1	0.576183	0.666596	0.176137	-0.0407294	neg
PE 38:1|PE 18:0_20:1	0.000631871	0.0113737	1.9441	0.237281	neg
PE 38:1|PE 20:0_18:1	0.00182175	0.0150294	1.82306	0.244182	neg
PE 38:2	0.0485018	0.16273	0.788532	-0.140932	pos
PE 38:2|PE 18:1_20:1	0.0236601	0.113347	0.945589	-0.313659	pos
PE 38:3|PE 18:0_20:3	0.751094	0.799551	0.0971537	-0.0288942	neg
PE 38:3|PE 18:1_20:2	0.55326	0.648199	0.188292	-0.033751	neg
PE 38:4|PE 18:0_20:4	0.0132066	0.0466949	1.33073	0.136792	neg
PE 38:4|PE 18:1_20:3	0.901681	0.92504	0.0338393	0.00779174	neg
PE 38:5	0.202099	0.3605	0.443094	-0.139487	pos
PE 38:5|PE 18:1_20:4	0.300727	0.39696	0.401254	-0.0658009	neg
PE 38:6|PE 16:0_22:6	0.17493	0.264182	0.578096	0.108022	neg
PE 38:6|PE 16:0_22:6	0.920184	0.957604	0.0188139	0.00418907	pos
PE 38:6|PE 18:1_20:5	0.0236798	0.113347	0.945589	-0.401703	pos
PE 39:7;O|PE 22:6_17:1;O	0.0571544	0.116666	0.933057	-0.141477	neg
PE 40:2|PE 20:1_20:1	0.183259	0.270786	0.567373	-0.175763	neg
PE 40:2|PE 20:1_20:1	0.0467429	0.16213	0.790137	0.375633	pos
PE 40:4|PE 20:2_20:2	0.032251	0.0798213	1.09788	0.12431	neg
PE 40:5|PE 18:0_22:5	1.06024e-05	0.00209927	2.67793	0.195525	neg
PE 40:6|PE 18:0_22:6	0.000960689	0.0124947	1.90327	0.267237	neg
PE 40:7	0.207846	0.3605	0.443094	-0.110979	pos
PE 40:7|PE 18:1_22:6	0.80382	0.846576	0.0723341	0.0160399	neg
PE O-32:1|PE O-16:1_16:0	0.110567	0.190367	0.720408	0.206494	neg
PE O-32:2|PE O-16:1_16:1	0.808511	0.847012	0.0721105	0.00518239	neg
PE O-33:2|PE O-16:1_17:1	0.148726	0.237481	0.62437	0.067013	neg
PE O-33:2|PE O-17:1_16:1	0.29654	0.39406	0.404438	-0.0779772	neg
PE O-34:0|PE O-18:0_16:0	0.0915221	0.16824	0.774072	0.199504	neg
PE O-34:1|PE O-18:1_16:0	0.0140279	0.0478885	1.31977	0.287425	neg
PE O-34:2|PE O-16:1_18:1	0.0177202	0.0554642	1.25599	0.132158	neg
PE O-34:3|PE O-16:1_18:2	0.0649472	0.129894	0.886409	-0.119119	neg
PE O-34:3|PE O-18:2_16:1	0.00368196	0.020155	1.69562	-0.192868	neg
PE O-35:2|PE O-17:1_18:1	0.0967315	0.174117	0.75916	0.110727	neg
PE O-36:1|PE O-18:0_18:1	0.450842	0.54101	0.266795	0.0728023	neg
PE O-36:2|PE O-16:1_20:1	0.00430251	0.0218435	1.66068	0.29096	neg
PE O-36:2|PE O-18:1_18:1	0.936954	0.950864	0.0218815	-0.00897659	neg
PE O-36:3|PE O-18:2_18:1	0.00842483	0.0327082	1.48534	-0.114298	neg
PE O-36:4|PE O-16:1_20:3	0.385346	0.482902	0.316141	-0.0777366	neg
PE O-36:4|PE O-18:2_18:2	0.00483368	0.0233432	1.63184	-0.22093	neg
PE O-36:5|PE O-16:1_20:4	0.24389	0.337694	0.471476	-0.0872684	neg
PE O-38:2|PE O-18:1_20:1	0.0158613	0.0523422	1.28115	0.347972	neg
PE O-38:3|PE O-16:1_22:2	0.00376634	0.020155	1.69562	-0.110185	neg
PE O-38:3|PE O-18:2_20:1	0.0524689	0.11052	0.95656	-0.0917278	neg
PE O-38:4|PE O-16:1_22:3	0.00168426	0.0150294	1.82306	-0.173314	neg
PE O-38:4|PE O-18:1_20:3	0.346126	0.442148	0.354432	0.0589987	neg
PE O-38:5|PE O-16:1_22:4	0.0246671	0.0659654	1.18068	-0.093145	neg
PE O-38:5|PE O-18:1_20:4	0.170961	0.264182	0.578096	0.107441	neg
PE O-38:5|PE O-18:2_20:3	0.316388	0.409443	0.387807	-0.0432166	neg
PE O-38:6|PE O-16:1_22:5	0.00566104	0.0243671	1.6132	-0.1204	neg
PE O-40:3|PE O-18:2_22:1	0.0791631	0.152178	0.817649	0.303476	neg
PE O-40:4|PE O-18:2_22:2	0.00226643	0.0176908	1.75225	-0.414812	neg
PE O-40:6|PE O-18:1_22:5	0.615472	0.684626	0.164547	-0.0170369	neg
PE O-40:7|PE O-18:2_22:5	7.57995e-05	0.00375207	2.42573	-0.334244	neg
PE O-40:8|PE O-18:2_22:6	0.0109396	0.0414396	1.38258	-0.122014	neg
PE P-32:0|PE P-16:0_16:0	0.113205	0.258858	0.586938	0.162661	pos
PE P-32:1|PE P-16:0_16:1	0.205995	0.3605	0.443094	-0.160026	pos
PE P-34:0|PE P-18:0_16:0	0.00675435	0.0906313	1.04272	0.341041	pos
PE P-34:1|PE P-16:0_18:1	0.690542	0.820876	0.0857226	-0.0417223	pos
PE P-34:2|PE P-16:0_18:2	0.0882705	0.21889	0.659774	-0.223745	pos
PE P-34:2|PE P-18:1_16:1	0.0477285	0.1624	0.789415	-0.268983	pos
PE P-35:1|PE P-17:0_18:1	0.901384	0.948964	0.0227503	0.011786	pos
PE P-36:1|PE P-16:0_20:1	0.122401	0.270629	0.567625	0.159253	pos
PE P-36:2|PE P-18:1_18:1	0.031659	0.130529	0.884293	-0.27067	pos
PE P-36:3|PE P-16:0_20:3	0.056127	0.170759	0.767615	-0.225551	pos
PE P-36:4|PE P-16:0_20:4	0.0615432	0.178177	0.749148	-0.205501	pos
PE P-36:5|PE P-16:0_20:5	0.203435	0.3605	0.443094	-0.154705	pos
PE P-38:1|PE P-18:0_20:1	0.0202487	0.104436	0.981149	0.230348	pos
PE P-38:2|PE P-16:0_22:2	0.0106164	0.0906313	1.04272	-0.217205	pos
PE P-38:2|PE P-18:1_20:1	0.0479509	0.1624	0.789415	-0.281736	pos
PE P-38:3|PE P-16:0_22:3	0.0908484	0.21889	0.659774	-0.242032	pos
PE P-38:4|PE P-18:0_20:4	0.872754	0.93808	0.0277601	-0.0191614	pos
PE P-38:5|PE P-16:0_22:5	0.168631	0.327235	0.48514	-0.206466	pos
PE P-40:5|PE P-18:0_22:5	0.782945	0.867522	0.0617193	-0.0353395	pos
PE P-40:6|PE P-16:0_24:6	0.216659	0.368628	0.433411	-0.101197	pos
PE P-40:7|PE P-18:1_22:6	0.0194005	0.103252	0.986104	-0.28249	pos
Pentaerythritol tetrakis(3,5-di-tert-butyl-4-hydroxyhydrocinnamate)	0.260584	0.350991	0.454704	-0.325068	neg
PG 34:1|PG 16:0_18:1	0.540608	0.637145	0.195761	-0.0295166	neg
PG 34:2|PG 16:1_18:1	0.0361566	0.0852263	1.06943	-0.178747	neg
PG 36:2|PG 18:1_18:1	0.0116439	0.0426943	1.36963	-0.245674	neg
PI 32:0|PI 16:0_16:0	0.000480739	0.00951863	2.02143	0.60372	neg
PI 32:1	0.000225777	0.00745063	2.12781	0.286058	neg
PI 32:2	0.0197136	0.0574013	1.24108	0.182043	neg
PI 34:0	0.000416668	0.00951863	2.02143	0.522263	neg
PI 34:1|PI 16:0_18:1	0.000737167	0.0121342	1.91599	0.234848	neg
PI 34:2|PI 16:1_18:1	0.778702	0.824508	0.0838051	0.00907788	neg
PI 36:1|PI 18:0_18:1	0.401293	0.4966	0.303994	-0.0352007	neg
PI 36:2	0.257112	0.415781	0.381135	0.0553656	pos
PI 36:2|PI 18:0_18:2	0.943613	0.950864	0.0218815	-0.0108541	neg
PI 36:2|PI 18:1_18:1	0.0170858	0.0554587	1.25603	0.135799	neg
PI 36:3	0.00750563	0.0303289	1.51814	-0.153184	neg
PI 36:3|PI 16:0_20:3	0.97982	0.97982	0.00885362	0.00161154	neg
PI 36:4|PI 16:0_20:4	0.0744104	0.14628	0.834816	0.254202	neg
PI 38:1|PI 18:0_20:1	0.0230035	0.0650671	1.18664	-0.142993	neg
PI 38:2|PI 18:0_20:2	0.0011813	0.0137587	1.86142	-0.287987	neg
PI 38:2|PI 18:1_20:1	0.00160414	0.0150294	1.82306	-0.175482	neg
PI 38:3|PI 18:0_20:3	0.00693111	0.0285908	1.54377	-0.197815	neg
PI 38:4|PI 18:0_20:4	0.946062	0.950864	0.0218815	-0.00428633	neg
PI 38:4|PI 18:1_20:3	0.583402	0.667709	0.175413	0.0160073	neg
PI 38:5|PI 18:1_20:4	0.0746175	0.14628	0.834816	0.119092	neg
PI 40:6	0.00775309	0.0307022	1.51283	-0.197122	neg
PS 32:1|PS 16:0_16:1	0.00251341	0.0184317	1.73443	-0.293372	neg
PS 32:1|PS 16:0_16:1	0.0824619	0.21452	0.668532	-0.699331	pos
PS 34:1	0.0583616	0.174447	0.758337	-0.402857	pos
PS 34:1|PS 16:0_18:1	0.103777	0.181839	0.740314	-0.24244	neg
PS 34:2|PS 16:1_18:1	0.000894407	0.0124947	1.90327	-0.33851	neg
PS 34:2|PS 17:1_17:1	0.0550996	0.170524	0.768215	-0.748615	pos
PS 36:1	0.410166	0.577449	0.238486	0.0575562	pos
PS 36:1|PS 18:0_18:1	0.0754718	0.146504	0.83415	0.145206	neg
PS 36:1|PS 18:0_18:1	0.508774	0.66136	0.179562	0.126247	pos
PS 36:2	0.0289542	0.125235	0.902273	-0.375158	pos
PS 36:2|PS 18:1_18:1	0.00279116	0.0186232	1.72995	-0.33319	neg
PS 36:4|PS 18:2_18:2	0.0832967	0.158584	0.79974	-0.20253	neg
PS 38:3	0.128131	0.213763	0.670067	0.23357	neg
PS 40:2|PS 18:1_22:1	0.102564	0.181319	0.741557	0.256542	neg
SM 32:1;2O	0.883798	0.944296	0.0248919	-0.0109295	pos
SM 33:1;2O	0.418244	0.584239	0.233409	-0.0496153	pos
SM 34:0;2O	0.0280299	0.0720768	1.1422	0.617438	neg
SM 34:0;2O	0.0208902	0.104436	0.981149	0.453372	pos
SM 34:1;2O	0.98988	0.995425	0.00199128	-0.00103347	pos
SM 34:1;2O|SM 18:1;2O/16:0	0.0110924	0.0414396	1.38258	0.102987	neg
SM 34:1;2O|SM 18:1;2O/16:0	0.359912	0.527381	0.277876	-0.0489399	pos
SM 34:2;2O	0.894934	0.948964	0.0227503	0.0200119	pos
SM 36:1;2O	0.0015613	0.0150294	1.82306	0.234235	neg
SM 36:1;2O	0.448317	0.611961	0.213276	0.0893685	pos
SM 36:1;2O|SM 18:1;2O/18:0	0.493806	0.651751	0.185918	0.0361314	pos
SM 38:1;2O	0.900585	0.948964	0.0227503	0.0104248	pos
SM 38:1;2O|SM 18:1;2O/20:0	0.811733	0.893902	0.0487101	-0.0211231	pos
SM 40:1;2O	3.13374e-05	0.00281327	2.55079	0.449091	neg
SM 40:1;2O	0.0156522	0.0906313	1.04272	0.306119	pos
SM 40:1;2O|SM 18:1;2O/22:0	0.0152256	0.0906313	1.04272	0.338439	pos
SM 40:2;3O	0.275091	0.43127	0.365251	0.076201	pos
SM 41:1;2O	0.00287319	0.0859562	1.06572	0.378872	pos
SM 41:3;3O	0.0304397	0.129115	0.889023	0.726763	pos
SM 42:1;2O	4.26253e-05	0.00281327	2.55079	0.689146	neg
SM 42:1;2O	0.000335568	0.0286195	1.54334	0.558142	pos
SM 42:2;2O	0.00535852	0.0235775	1.6275	0.646307	neg
SM 42:2;2O	0.00348425	0.089346	1.04892	0.394779	pos
SM 42:2;2O|SM 18:1;2O/24:1	0.00813392	0.0906313	1.04272	0.477966	pos
SM 42:3;2O	0.0499773	0.164369	0.784181	0.183712	pos
SM 44:2;2O	0.0761617	0.204045	0.690274	0.298447	pos
SPB 18:1;2O	0.213832	0.3673	0.434979	-0.683407	pos
TG 24:0|TG 8:0_8:0_8:0	0.23517	0.38906	0.409984	0.274288	pos
TG 26:0|TG 8:0_8:0_10:0	0.55722	0.701902	0.153724	0.10919	pos
TG 40:0|TG 12:0_14:0_14:0	0.201898	0.3605	0.443094	0.282457	pos
TG 44:0|TG 14:0_14:0_16:0	0.146211	0.296552	0.5279	0.175695	pos
TG 46:0|TG 14:0_16:0_16:0	0.0117094	0.0906313	1.04272	0.238896	pos
TG 46:1|TG 14:0_16:0_16:1	0.656825	0.783389	0.106023	-0.0357621	pos
TG 47:1|TG 15:0_16:0_16:1	0.53999	0.685005	0.164307	0.0892595	pos
TG 48:0|TG 14:0_14:0_20:0	0.00559621	0.0906313	1.04272	0.33042	pos
TG 48:0|TG 14:0_16:0_18:0	0.00621018	0.0906313	1.04272	0.336495	pos
TG 48:1|TG 14:0_16:0_18:1	0.982927	0.994893	0.00222346	-0.0018737	pos
TG 48:2|TG 12:0_18:1_18:1	0.1572	0.311997	0.505849	-0.139593	pos
TG 48:2|TG 14:0_16:1_18:1	0.0906509	0.21889	0.659774	-0.191596	pos
TG 49:1|TG 15:0_16:0_18:1	0.0205925	0.104436	0.981149	0.414156	pos
TG 49:2|TG 15:0_16:1_18:1	0.827518	0.902975	0.0443241	0.0180862	pos
TG 50:0|TG 16:0_16:0_18:0	0.000165925	0.0286195	1.54334	0.431013	pos
TG 50:1|TG 16:0_16:0_18:1	0.205301	0.3605	0.443094	0.0932084	pos
TG 50:2|TG 16:0_16:1_18:1	0.176121	0.334538	0.475555	-0.154399	pos
TG 50:3|TG 16:1_16:1_18:1	0.303155	0.469106	0.328729	-0.148303	pos
TG 52:0|TG 16:0_18:0_18:0	0.404655	0.571933	0.242655	0.16107	pos
TG 52:1|TG 16:0_18:0_18:1	0.013561	0.0906313	1.04272	0.303004	pos
TG 52:2|TG 16:0_18:1_18:1	0.13621	0.291068	0.536006	-0.139131	pos
TG 52:3|TG 16:1_18:1_18:1	0.345482	0.512512	0.290296	-0.146774	pos
TG 52:4|TG 16:0_18:1_18:3	0.913328	0.956065	0.0195128	0.0322404	pos
TG 52:4|TG 16:0_18:2_18:2	0.838066	0.911714	0.0401412	0.0584741	pos
TG 52:5|TG 16:0_18:2_18:3	0.610092	0.745537	0.127531	0.156528	pos
TG 54:1|TG 16:0_20:0_18:1	0.0136039	0.0906313	1.04272	0.226263	pos
TG 54:1|TG 18:0_18:0_18:1	0.139053	0.291251	0.535732	0.229757	pos
TG 54:2|TG 18:0_18:1_18:1	0.178039	0.3364	0.473144	0.082209	pos
TG 54:3|TG 18:1_18:1_18:1	0.0398274	0.150271	0.823125	-0.20702	pos
TG 54:4|TG 18:1_18:1_18:2	0.719718	0.830148	0.0808447	-0.107236	pos
TG 54:5|TG 18:1_18:2_18:2	0.992989	0.995763	0.00184418	-0.00231054	pos
TG 54:6|TG 18:2_18:2_18:2	0.851037	0.923028	0.0347853	0.0442689	pos
TG 56:2|TG 16:0_20:1_20:1	0.0879367	0.21889	0.659774	0.159961	pos
TG 56:3|TG 18:1_18:1_20:1	0.0587968	0.174447	0.758337	-0.152901	pos
TG O-53:2|TG O-17:0_18:1_18:1	0.281229	0.437061	0.359458	-0.227297	pos
TG O-57:9|TG O-15:3_21:3_21:3	0.116424	0.261226	0.582984	-0.144789	pos
Triphenylphosphine oxide (also known as chemical regent)	0.98658	0.994893	0.00222346	-0.00475432	pos
Uridine-5-diphosphoacetylglucosamine	0.30313	0.397482	0.400683	-0.691315	neg
