# Supplementary material for: Target deconvolution of HDAC pharmacopoeia highlights MBLAC2 as common off-target
Source: Research Square preprint supplement (doi:10.21203/rs.3.rs-646613/v1), 2021-07-12
Supplement: Supplementary file 10 [file 34708596e22771983368f7d0.xlsx]

## Sheet: BioPlex interactors
Interactors of MBLAC2 according to BioPlex
MBLAC2
APC2
PDPN
CD226
HYPM
ADCY9
CACNG1
CACNG5
IGSF8
RNF19B
ASIC1
BCS1L
STEAP3
PI4K2A
AGTRAP
FBRS
CD63
GMCL1
ZDHHC20
CLCN7
EPHA7
ATP11C
BLOC1S3
SLC5A6
BZW2
GRPR
IL2RA
OPCML
CDHR5
MINDY2
SELE
VAMP4
DLK1
FAM131B
RAMP3
MANSC1
BSPRY
PCDHGA5
TTYH1
SLC9A6
FLRT3
TMEM230
GJD4
SLC39A12
F11R

## Sheet: GO_annotation_BioPlex_MBLAC2
Category	Identifier	-log10(jAdjusterd p-value)
integral component of plasma membrane	GO:0005887	4.87615
response to pH	GO:0009268	3.27327
endosome to melanosome transport	GO:0035646	3.18977
plasma membrane	GO:0005886	3.01055
BLOC-1 complex (Biogenesis of lysosome-related organelles complex 1)	GO:0031083	2.86967
filopodium membrane	GO:0031527	2.72125
lysosomal membrane	GO:0005765	2.61618
positive regulation of receptor internalization	GO:0002092	2.5157
microvillus membrane	GO:0031528	2.51145
chemorepellent activity	GO:0045499	2.37675
ion transmembrane transport	GO:0034220	2.23807
membrane raft	GO:0045121	2.19791
recycling endosome	GO:0055037	2.16941
negative chemotaxis	GO:0050919	2.14569
calcium ion transmembrane transport	GO:0070588	2.10679
cell junction	GO:0030054	2.09474
cytoplasmic vesicle	GO:0031410	2.04576
voltage-gated calcium channel activity	GO:0005245	2.01368
cardiac conduction	GO:0061337	1.91364
integral component of postsynaptic membrane	GO:0099055	1.90658
brush border membrane	GO:0031526	1.81531
axon terminus	GO:0043679	1.77728
clathrin-coated pit	GO:0005905	1.75449
chloride channel activity	GO:0005254	1.70333
cell adhesion molecule binding	GO:0050839	1.65561
trans-Golgi network	GO:0005802	1.64782
cell adhesion	GO:0007155	1.63639
calcium ion transport	GO:0006816	1.45469
sodium ion transport	GO:0006814	1.37572
chloride transmembrane transport	GO:1902476	1.31247

## Sheet: ProteomeHD_MBLAC2_coregulated
# This file was downloaded from proteomehd.net. It contains proteins co-regulated with your query (above selected score cut-off).
# You query was: Q68D91. Your selected score cut-off was: 0.975
uniprot_acc	protein_names	gene_names	percentile_score	co-regulation score
Q68D91	Metallo-beta-lactamase domain-containing protein 2	MBLAC2	1	1
Q16181	Septin-7	SEPT7	0.997856	0.0340837
Q6IA69	Glutamine-dependent NAD(+) synthetase	NADSYN1	0.997743	0.0330586
P16930	Fumarylacetoacetase	FAH	0.996926	0.0276012
P52907	F-actin-capping protein subunit alpha-1	CAPZA1	0.996652	0.0262866
P20073-2	Annexin A7	ANXA7	0.996592	0.0260214
Q8WZA0-2	Protein LZIC	LZIC	0.996382	0.0251435
Q15019	Septin-2	SEPT2	0.996186	0.0244342
Q9UK41	Vacuolar protein sorting-associated protein 28 homolog	VPS28	0.995885	0.0234204
Q15477	Helicase SKI2W	SKIV2L	0.995742	0.0229796
Q99816	Tumor susceptibility gene 101 protein	TSG101	0.995606	0.0225901
P35573	Glycogen debranching enzyme	AGL	0.99539	0.0220035
Q6PGP7	Tetratricopeptide repeat protein 37	TTC37	0.994823	0.0206356
Q9NVA2	Septin-11	SEPT11	0.99482	0.0206302
Q07817-3	Bcl-2-like protein 1	BCL2L1	0.994726	0.0204295
P54619-2	5'-AMP-activated protein kinase subunit gamma-1	PRKAG1	0.994687	0.0203439
Q9HBL7	Plasminogen receptor	PLGRKT	0.994065	0.0191381
P47756-2	F-actin-capping protein subunit beta	CAPZB	0.993957	0.0189444
Q9Y2H0-1	Disks large-associated protein 4	DLGAP4	0.993926	0.0188893
O60613	Selenoprotein F	SELENOF	0.99329	0.0178769
P06132	Uroporphyrinogen decarboxylase	UROD	0.993224	0.0177782
Q9GZP4	PITH domain-containing protein 1	PITHD1	0.993123	0.0176315
P07311	Acylphosphatase-1	ACYP1	0.99299	0.0174437
P34949	Mannose-6-phosphate isomerase	MPI	0.99297	0.0174177
Q9H0R4	Haloacid dehalogenase-like hydrolase domain-containing protein 2	HDHD2	0.992325	0.0165805
Q9HAB8	Phosphopantothenate--cysteine ligase	PPCS	0.992216	0.0164559
Q86Y39	NADH dehydrogenase	NDUFA11	0.992115	0.0163384
O95825	Quinone oxidoreductase-like protein 1	CRYZL1	0.9919	0.0160881
P30041	Peroxiredoxin-6	PRDX6	0.991789	0.0159677
Q9Y478	5'-AMP-activated protein kinase subunit beta-1	PRKAB1	0.991452	0.0156165
Q5T4S7-3	E3 ubiquitin-protein ligase UBR4	UBR4	0.991303	0.0154649
O00161	Synaptosomal-associated protein 23	SNAP23	0.991176	0.0153368
O75608	Acyl-protein thioesterase 1	LYPLA1	0.991093	0.0152612
Q96CW1	AP-2 complex subunit mu	AP2M1	0.991006	0.0151829
Q15436	Protein transport protein Sec23A	SEC23A	0.990083	0.0143725
Q9UHA4	Ragulator complex protein LAMTOR3	LAMTOR3	0.989837	0.0141748
Q8N9N7	Leucine-rich repeat-containing protein 57	LRRC57	0.989719	0.0140842
O95169-3	NADH dehydrogenase	NDUFB8	0.989363	0.0138166
Q9UJW0	Dynactin subunit 4	DCTN4	0.989164	0.0136687
P62140	Serine/threonine-protein phosphatase PP1-beta catalytic subunit	PPP1CB	0.989125	0.0136419
O95630	STAM-binding protein	STAMBP	0.988847	0.0134513
O75368	SH3 domain-binding glutamic acid-rich-like protein	SH3BGRL	0.988579	0.013269
Q9UIJ7	GTP:AMP phosphotransferase AK3 mitochondrial	AK3	0.988412	0.013158
O95167	NADH dehydrogenase	NDUFA3	0.988213	0.0130316
P13489	Ribonuclease inhibitor	RNH1	0.988103	0.0129624
Q9BWS9	Chitinase domain-containing protein 1	CHID1	0.986607	0.0121043
P61981	14-3-3 protein gamma	YWHAG	0.98645	0.0120249
O43464	Serine protease HTRA2 mitochondrial	HTRA2	0.98628	0.0119382
O14618	Copper chaperone for superoxide dismutase	CCS	0.985535	0.011575
P00846	ATP synthase subunit a	MT-ATP6	0.985491	0.0115532
P42025	Beta-centractin	ACTR1B	0.985381	0.0115015
P07737	Profilin-1	PFN1	0.984505	0.0111138
P63010	AP-2 complex subunit beta	AP2B1	0.984497	0.0111102
Q86Y82	Syntaxin-12	STX12	0.984286	0.0110215
Q8NEZ2	Vacuolar protein sorting-associated protein 37A	VPS37A	0.983892	0.01086
Q9UHG3	Prenylcysteine oxidase 1	PCYOX1	0.983866	0.0108495
Q9NZ32	Actin-related protein 10	ACTR10	0.983761	0.01081
Q8IXI2-3	Mitochondrial Rho GTPase 1	RHOT1	0.983726	0.0107968
Q96QK1	Vacuolar protein sorting-associated protein 35	VPS35	0.983719	0.0107945
P08134	Rho-related GTP-binding protein RhoC	RHOC	0.982924	0.0104908
Q9NQW7-3	Xaa-Pro aminopeptidase 1	XPNPEP1	0.982015	0.0101679
Q9NYU2-2	UDP-glucose:glycoprotein glucosyltransferase 1	UGGT1	0.98191	0.0101306
Q8IWB7	WD repeat and FYVE domain-containing protein 1	WDFY1	0.98139	0.00996125
Q96IX5	Up-regulated during skeletal muscle growth protein 5	USMG5	0.981254	0.00991814
Q7Z7H5	Transmembrane emp24 domain-containing protein 4	TMED4	0.981183	0.00989596
P35813	Protein phosphatase 1A	PPM1A	0.981171	0.00989221
Q16775-2	Hydroxyacylglutathione hydrolase mitochondrial	HAGH	0.981122	0.00987645
P06753-2	Tropomyosin alpha-3 chain	TPM3	0.980944	0.00982114
O43772	Mitochondrial carnitine/acylcarnitine carrier protein	SLC25A20	0.980462	0.00967312
P16333	Cytoplasmic protein NCK1	NCK1	0.980414	0.00965733
P61020	Ras-related protein Rab-5B	RAB5B	0.97995	0.00951782
Q9UI09	NADH dehydrogenase	NDUFA12	0.979888	0.00950085
Q9UBQ7	Glyoxylate reductase/hydroxypyruvate reductase	GRHPR	0.97953	0.00939986
Q8WUM4	Programmed cell death 6-interacting protein	PDCD6IP	0.979379	0.00935669
P19367	Hexokinase-1	HK1	0.979107	0.00928138
P23786	Carnitine O-palmitoyltransferase 2 mitochondrial	CPT2	0.978236	0.00904736
P40925-3	Malate dehydrogenase cytoplasmic	MDH1	0.978175	0.00903134
Q15363	Transmembrane emp24 domain-containing protein 2	TMED2	0.978	0.00898662
O43617	Trafficking protein particle complex subunit 3	TRAPPC3	0.977915	0.0089663
P84077	ADP-ribosylation factor 1	ARF1	0.97778	0.0089318
O43414	ERI1 exoribonuclease 3	ERI3	0.977693	0.00890967
O95336	6-phosphogluconolactonase	PGLS	0.97763	0.0088938
Q96IU4	Protein ABHD14B	ABHD14B	0.977477	0.00885653
Q15642-2	Cdc42-interacting protein 4	TRIP10	0.977442	0.0088476
P45984-2	Mitogen-activated protein kinase 9	MAPK9	0.97734	0.00882254
P22059	Oxysterol-binding protein 1	OSBP	0.977295	0.0088116
Q8NBX0	Saccharopine dehydrogenase-like oxidoreductase	SCCPDH	0.977267	0.00880463
Q9BRG1	Vacuolar protein-sorting-associated protein 25	VPS25	0.977059	0.00875684
Q9Y2Q5	Ragulator complex protein LAMTOR2	LAMTOR2	0.977057	0.00875641
O75436	Vacuolar protein sorting-associated protein 26A	VPS26A	0.976873	0.00871094
Q9H7C9	Mth938 domain-containing protein	AAMDC	0.976719	0.00867453
O75964	ATP synthase subunit g mitochondrial	ATP5L	0.976612	0.00864882
Q9BXK5	Bcl-2-like protein 13	BCL2L13	0.976488	0.0086205
O95834-2	Echinoderm microtubule-associated protein-like 2	EML2	0.97627	0.00857161
P23368	NAD-dependent malic enzyme mitochondrial	ME2	0.976185	0.00855215
P47755	F-actin-capping protein subunit alpha-2	CAPZA2	0.975773	0.00846018
Q9Y2L5	Trafficking protein particle complex subunit 8	TRAPPC8	0.975347	0.00836668

## Sheet: ProteomeHD_GO_Subcellular
# This file was downloaded from proteomehd.net. It contains GO Subcellular Components enriched among proteins co-regulated with your query (above selected score cut-off)
# You query was: Q68D91. Your selected score cut-off was: 0.975
GO Subcellular Components enriched among the currently selected co-regulated proteins	No. of proteins	Adj p-value (Bonferroni)
extracellular exosome	51	3.07e-18
vesicle	56	8.41e-18
membrane-bounded vesicle	55	1.46e-17
cytosol	44	2.62e-10
extracellular region	51	6.42e-10
cytoplasmic part	64	7.95e-09
cytoplasm	73	2.26e-07
intracellular organelle part	61	2.73e-06
membrane protein complex	20	4.05e-06
membrane-bounded organelle	75	2.76e-05
organelle part	59	8.06e-05
organelle membrane	33	0.000228
protein complex	37	0.00139
ESCRT complex	4	0.00208
mitochondrion	22	0.00225
dynactin complex	3	0.00548
ESCRT I complex	3	0.00874
mitochondrial part	15	0.00966
organelle	72	0.0106
F-actin capping protein complex	3	0.0131
macromolecular complex	38	0.0168
intracellular organelle	68	0.0181
endosomal part	10	0.0193
actin cytoskeleton	10	0.0193
endosome	13	0.0362
intracellular membrane-bounded organelle	64	0.0401
mitochondrial membrane	12	0.0422
late endosome	7	0.0453
mitochondrial envelope	12	0.0673
endosome membrane	9	0.0744
cleavage furrow	4	0.0767

## Sheet: ProteomeHD_GO_BioProcess
# This file was downloaded from proteomehd.net. It contains GO Biological Processes enriched among proteins co-regulated with your query (above selected score cut-off)
# You query was: Q68D91. Your selected score cut-off was: 0.975
GO Biological Processes enriched among the currently selected co-regulated proteins	No. of proteins	Adj p-value (Bonferroni)
intracellular transport	22	0.000291
membrane organization	18	0.000376
single-organism intracellular transport	20	0.000759
establishment of localization in cell	24	0.00264
cellular localization	26	0.00498
membrane budding	6	0.00781
protein transport	19	0.0115
oxidation-reduction process	17	0.0135
ubiquitin-dependent protein catabolic process via the multivesicular body sorting pathway	4	0.0175
antigen processing and presentation of exogenous peptide antigen via MHC class II	6	0.0249
organic substance transport	23	0.035
macromolecule localization	24	0.0362
vesicle organization	8	0.0418
vesicle-mediated transport	17	0.0837
mitochondrial transport	7	0.0842
protein localization	21	0.0848
negative regulation of protein polymerization	5	0.0848
negative regulation of protein complex assembly	6	0.0989

## Sheet: ProteomeHD_KEGG
# This file was downloaded from proteomehd.net. It contains KEGG pathways enriched among proteins co-regulated with your query (above selected score cut-off)
# You query was: Q68D91. Your selected score cut-off was: 0.975
KEGG pathways enriched among the currently selected co-regulated proteins	No. of proteins	Adj p-value (Bonferroni)
Endocytosis	9	7.88e-05
Pyruvate metabolism	5	0.000322
Huntington's disease	7	0.00622
Metabolic pathways	16	0.0238
