# Supplementary material for: Target deconvolution of HDAC pharmacopoeia highlights MBLAC2 as common off-target
Source: Research Square preprint supplement (doi:10.21203/rs.3.rs-646613/v1), 2021-07-12
Supplement: Supplementary file 11 [file a57e50b8da125faa45853064.xlsx]

## Sheet: 210602_CATDStable_medianCF
CATDS score	@EC50HDAC1	@EC50HDAC2	@EC50HDAC3	@EC50MBLAC2	@EC50C21orf33	@EC50ALDH2	@EC50ISOC1	@EC50ISOC2	@EC50HDAC4	@EC50HDAC5	@EC50HDAC7	@EC50HDAC8	@EC50HDAC6	@EC50HDAC10
MC1568	NA	NA	NA	1	NA	NA	NA	NA	NA	NA	NA	NA	NA	NA
ACY-738	NA	NA	NA	NA	NA	NA	NA	NA	NA	NA	NA	NA	1	NA
PCI-34051	NA	NA	NA	NA	NA	NA	NA	NA	NA	NA	NA	1	NA	NA
M344	0.0627139	0.0746944	0.0843589	NA	0.1041	0.186131	0.11858	0.470599	NA	NA	NA	NA	0.286446	0.0799744
Ricolinostat	0.0711228	0.0696019	0.0927389	0.0912612	0.0557057	0.109761	0.0807049	0.603345	NA	NA	NA	NA	0.270352	0.131433
Citarinostat	0.0801057	0.0658026	0.107581	0.137025	0.104926	0.0960088	NA	0.167148	NA	NA	NA	NA	0.394971	0.0792891
Scriptaid	0.0866341	0.115347	0.216707	0.0722768	0.0672572	0.119415	0.081633	0.177574	NA	NA	NA	NA	0.284151	NA
Vorinostat	0.0911522	0.0849709	0.178105	NA	0.0777663	0.103387	0.16971	0.508998	NA	NA	NA	NA	0.165332	0.0743101
HDACi-XXIV	0.0960723	0.15816	0.215417	0.470436	NA	NA	NA	NA	NA	NA	NA	0.119934	0.258684	NA
Abexinostat	0.141886	0.117495	0.112414	0.238469	NA	NA	NA	NA	NA	NA	NA	NA	0.149912	0.342869
AR-42	0.147273	0.134031	0.200509	0.247655	NA	NA	NA	NA	NA	NA	NA	0.102719	0.383007	NA
LMK235	0.172064	0.136486	0.207545	NA	NA	0.0994192	0.0811749	0.289412	NA	NA	NA	NA	0.155581	0.0943798
Givinostat	0.175689	0.108035	0.391574	0.143032	NA	NA	NA	NA	NA	NA	NA	0.127253	0.191953	0.12592
Trichostatin A	0.191717	0.19293	0.190424	0.111614	NA	NA	NA	NA	NA	NA	NA	NA	0.350984	0.132903
CAY10603	0.196308	0.205176	0.129208	0.224223	NA	NA	NA	NA	NA	NA	NA	NA	0.909952	NA
Belinostat	0.228052	0.194761	0.613207	NA	NA	NA	NA	NA	NA	NA	NA	NA	0.319154	NA
Pracinostat	0.233101	0.186806	0.250969	0.712297	NA	NA	NA	NA	NA	NA	NA	NA	NA	NA
Dacinostat	0.270943	0.159794	0.280631	0.110815	NA	NA	NA	NA	NA	NA	NA	NA	0.140508	0.135285
Panobinostat	0.274204	0.209327	0.321682	0.0923191	NA	NA	NA	NA	0.0753482	NA	NA	0.0693927	0.129313	0.127296
RG2833	0.28657	0.328545	0.428371	NA	NA	NA	NA	NA	NA	NA	NA	NA	NA	NA
CUDC101	0.308991	0.286273	0.265084	0.12799	NA	0.0718547	NA	0.0974562	NA	NA	NA	NA	0.0984586	0.0785868
BG45	0.311779	0.319336	0.356304	NA	NA	NA	NA	NA	NA	NA	NA	NA	NA	NA
Romidepsin	0.319338	0.267162	0.408143	NA	NA	NA	NA	NA	0.104295	0.0721531	0.0769167	0.13784	0.0877112	NA
Fimepinostat	0.320352	0.25037	0.397389	0.121163	NA	NA	NA	NA	NA	NA	NA	0.0996016	0.112355	NA
Quisinostat	0.348977	0.246041	0.119073	0.0723349	NA	NA	NA	NA	NA	0.0788897	0.146703	0.123508	NA	0.108601
Tacedinaline	0.392106	0.306856	0.330534	NA	NA	NA	NA	NA	NA	NA	NA	NA	NA	NA
Tucidinostat	0.400809	0.334823	0.31968	NA	NA	NA	NA	NA	NA	NA	NA	NA	NA	NA
Mocetinostat	0.413135	0.458102	0.221641	NA	NA	NA	NA	NA	NA	NA	NA	NA	NA	NA
Domatinostat	0.468939	0.348335	0.214488	NA	NA	NA	NA	NA	NA	NA	NA	NA	NA	NA
Entinostat	0.532156	0.413895	0.259782	NA	NA	NA	NA	NA	NA	NA	NA	NA	NA	NA
Droxinostat	NA	NA	NA	0.155536	0.258316	0.685594	0.283833	0.115761	NA	NA	NA	NA	NA	NA
CHDI00465983	NA	NA	NA	0.256088	NA	NA	NA	NA	0.152573	0.607494	0.295421	0.117417	NA	NA
Tubastatin A	NA	NA	NA	0.319642	NA	NA	NA	NA	NA	NA	NA	NA	0.205672	0.666968
TH65	NA	NA	NA	0.369611	NA	NA	NA	NA	NA	NA	NA	NA	NA	0.831307
ACY-775	NA	NA	NA	0.476992	NA	NA	NA	NA	NA	NA	NA	NA	0.522662	NA
WT161	NA	NA	NA	0.518531	NA	NA	NA	NA	NA	NA	NA	NA	0.479484	NA
Tubacin	NA	NA	NA	0.562201	NA	NA	NA	NA	NA	NA	NA	NA	0.353464	NA
Nexturastat A	NA	NA	NA	0.860276	NA	NA	NA	NA	NA	NA	NA	NA	0.293101	0.226327
Bufexamac	NA	NA	NA	NA	0.394869	0.854254	0.204234	NA	NA	NA	NA	NA	NA	NA
CHDI00390576	NA	NA	NA	NA	NA	NA	NA	NA	0.200135	0.289259	0.832518	NA	NA	NA
TMP195	NA	NA	NA	NA	NA	NA	NA	NA	0.316101	0.239235	0.986867	NA	NA	NA
