# Supplementary material for: Target deconvolution of HDAC pharmacopoeia highlights MBLAC2 as common off-target
Source: Research Square preprint supplement (doi:10.21203/rs.3.rs-646613/v1), 2021-07-12
Supplement: Supplementary file 13 [file da4c15b89e9a4d2741e1a4db.xlsx]

## Sheet: Table S1_drug-target-landscape
Target landscape: apparent pKd values for each drug target pair		Drugs profiled by chemoproteomic assay
		Domatinostat	Abexinostat	ACY-738	ACY-775	AR-42	Belinostat	BG45	Bufexamac	CAY10603	CHDI00390576	CHDI00465983	Citarinostat	CUDC101	Fimepinostat	Dacinostat	Droxinostat	Entinostat	Givinostat	HDACi-XXIV	LMK235	M344	MC1568	Mocetinostat	Nexturastat A	Panobinostat	PCI-34051	Phenylbutanoic Acid	Pracinostat	Quisinostat	RG2833	Ricolinostat	Romidepsin	Scriptaid	Tacedinaline	TH65	TMP195	Trichostatin A	Tubacin	Tubastatin A	Tucidinostat	Valproic Acid	Vorinostat	WT161
Target proteins	ALDH2	<4.52	<4.52	<4.52	<4.52	<4.52	<4.52	<4.52	6.23264	<4.52	<4.52	<4.52	5.81581	4.66653	<4.52	<4.52	6.02539	<4.52	<4.52	<4.52	6.052	6.43468	<4.52	<4.52	<4.52	<4.52	<4.52	<2.52	<4.52	<4.52	<4.52	6.27473	<4.52	6.46535	<4.52	<4.52	<4.52	<4.52	<4.52	<4.52	<4.52	<2.52	6.26714	<4.52
	GATD3A	<4.52	<4.52	<4.52	<4.52	<4.52	<4.52	<4.52	5.79935	<4.52	<4.52	<4.52	5.73696	<4.52	<4.52	<4.52	5.61544	<4.52	<4.52	<4.52	<4.52	5.84017	<4.52	<4.52	<4.52	<4.52	<4.52	<2.52	<4.52	<4.52	<4.52	5.0678	<4.52	4.63187	<4.52	<4.52	<4.52	<4.52	<4.52	<4.52	<4.52	<2.52	5.81525	<4.52
	HDAC1	5.87708	6.13918	<4.52	<4.52	6.2177	6.02273	5.96986	<4.52	5.72247	<4.52	<4.52	5.41252	7.29424	7.93052	6.31597	<4.52	6.81256	6.01188	5.17651	6.64962	4.94907	<4.52	6.62701	<4.52	7.53061	<4.52	2.86753	5.90688	7.98012	5.99293	5.68886	8.49856	5.46011	5.99415	<4.52	<4.52	6.65774	<4.52	<4.52	6.81893	3.28156	5.96333	<4.52
	HDAC10	<4.52	7.8078	<4.52	<4.52	<4.52	<4.52	<4.52	<4.52	<4.52	<4.52	<4.52	5.47492	5.1321	<4.52	6.0745	<4.52	<4.52	5.87857	<4.52	5.76555	5.68837	<4.52	<4.52	5.9924	6.94761	<4.52	<2.52	<4.52	7.17251	<4.52	6.34114	<4.52	<4.52	<4.52	6.17277	<4.52	6.38422	<4.52	7.50708	<4.52	<2.52	5.85866	<4.52
	HDAC2	5.78661	5.59557	<4.52	<4.52	6.128	5.9963	6.09662	<4.52	5.84609	<4.52	<4.52	4.94232	7.33463	7.78947	6.21282	<4.52	6.73646	5.77946	6.21804	6.59397	5.59309	<4.52	6.78917	<4.52	7.48373	<4.52	3.49596	5.88769	7.90829	6.43609	5.76195	8.50837	6.32436	5.97315	<4.52	<4.52	6.7666	<4.52	<4.52	6.80978	2.73052	6.00016	<4.52
	HDAC3	5.06747	5.33034	<4.52	<4.52	6.75665	6.80453	6.13658	<4.52	5.57779	<4.52	<4.52	5.80935	7.20916	8.1515	6.37056	<4.52	6.3471	6.61119	6.54088	7.04167	5.72494	<4.52	6.04972	<4.52	7.65021	<4.52	<2.52	5.98882	7.25397	6.92716	6.0182	8.64797	7.41076	5.95609	<4.52	<4.52	6.69827	<4.52	<4.52	6.72104	<2.52	6.76842	<4.52
	HDAC4	<4.52	<4.52	<4.52	<4.52	<4.52	<4.52	<4.52	<4.52	<4.52	6.63387	5.98227	<4.52	<4.52	<4.52	<4.52	<4.52	<4.52	<4.52	<4.52	<4.52	<4.52	<4.52	<4.52	<4.52	5.24272	<4.52	<2.52	<4.52	<4.52	<4.52	<4.52	6.99462	<4.52	<4.52	<4.52	5.99441	<4.52	<4.52	<4.52	<4.52	<2.52	<4.52	<4.52
	HDAC5	<4.52	<4.52	<4.52	<4.52	<4.52	<4.52	<4.52	<4.52	<4.52	7.61452	7.61751	<4.52	<4.52	<4.52	<4.52	<4.52	<4.52	<4.52	<4.52	<4.52	<4.52	<4.52	<4.52	<4.52	5.90803	<4.52	<2.52	<4.52	6.53082	<4.52	<4.52	6.22434	<4.52	<4.52	<4.52	6.15354	<4.52	<4.52	<4.52	<4.52	<2.52	<4.52	<4.52
	HDAC6	<4.52	6.29797	6.66476	6.40431	7.39227	6.28375	<4.52	<4.52	6.42939	<4.52	<4.52	6.66277	5.65313	6.07282	6.03464	<4.52	<4.52	6.08129	6.72778	6.42816	6.68746	<4.52	<4.52	6.40909	6.90569	<4.52	<2.52	<4.52	<4.52	<4.52	7.08942	6.61961	7.72157	<4.52	<4.52	<4.52	7.09282	5.81358	5.02339	<4.52	<2.52	6.66045	6.14036
	HDAC7	<4.52	<4.52	<4.52	<4.52	<4.52	<4.52	<4.52	<4.52	<4.52	7.70273	6.81068	<4.52	<4.52	<4.52	<4.52	<4.52	<4.52	<4.52	<4.52	<4.52	<4.52	<4.52	<4.52	<4.52	<4.52	<4.52	<2.52	<4.52	7.19842	<4.52	<4.52	5.9892	<4.52	<4.52	<4.52	6.92463	<4.52	<4.52	<4.52	<4.52	<2.52	<4.52	<4.52
	HDAC8	<4.52	<4.52	<4.52	<4.52	5.61788	<4.52	<4.52	<4.52	<4.52	<4.52	5.94125	<4.52	<4.52	5.89484	<4.52	<4.52	<4.52	6.08627	6.03952	<4.52	<4.52	<4.52	<4.52	<4.52	5.45339	5.97489	3.90581	<4.52	7.5306	<4.52	<4.52	8.0089	<4.52	<4.52	<4.52	<4.52	<4.52	<4.52	<4.52	<4.52	<2.52	<4.52	<4.52
	ISOC1	<4.52	<4.52	<4.52	<4.52	<4.52	<4.52	<4.52	5.42865	<4.52	<4.52	<4.52	<4.52	<4.52	<4.52	<4.52	5.79132	<4.52	<4.52	<4.52	6.12719	6.06384	<4.52	<4.52	<4.52	<4.52	<4.52	<2.52	<4.52	<4.52	<4.52	5.98339	<4.52	5.51793	<4.52	<4.52	<4.52	<4.52	<4.52	<4.52	<4.52	<2.52	6.81837	<4.52
	ISOC2	<4.52	<4.52	<4.52	<4.52	<4.52	<4.52	<4.52	<4.52	<4.52	<4.52	<4.52	6.40822	5.95032	<4.52	<4.52	5.52308	<4.52	<4.52	<4.52	7.15426	7.37133	<4.52	<4.52	<4.52	<4.52	<4.52	<2.52	<4.52	<4.52	<4.52	8.08995	<4.52	7.39249	<4.52	<4.52	<4.52	<4.52	<4.52	<4.52	<4.52	<2.52	7.78451	<4.52
	MBLAC2	<4.52	7.06176	<4.52	6.13111	6.82329	<4.52	<4.52	<4.52	5.6399	<4.52	6.86665	5.80976	5.96682	6.13216	5.67953	5.2669	<4.52	5.74194	7.2757	<4.52	<4.52	5.82039	<4.52	7.59109	5.86071	<4.52	<2.52	6.26443	5.84012	<4.52	5.81762	<4.52	4.96156	<4.52	4.88977	<4.52	5.92357	5.77625	6.31099	<4.52	<2.52	<4.52	6.04038
